# Supplementary material for: Multi-omics analysis reveals glycerophospholipid metabolism mediated the improvement of meat quality by Se-enriched yeast in finishing pigs
Source: Research Square preprint supplement (doi:10.21203/rs.3.rs-8572025/v1), 2026-01-26
Supplement: Supplementary file 1 [file 3ec210ad388d46c595ab2788.xlsx]

## Sheet: Tittle page
Multi-omics analysis reveals glycerophospholipid metabolism mediated the improvement of meat quality by Se-enriched yeast in finishing pigs
Xiangqi Qiu 1, Panpan Lu 3, Mingfei Xiao 1, Sumei Zeng 1, Li Li 1, Haitao Yu 2, Aihua Deng 2, Min Zhu 1, E Xu 1*, Xiangfang Zeng 2*
1.Key Laboratory of Animal Genetics, Breeding and Reproduction in the Plateau Mountainous Region, Ministry of Education /Institute of Animal Nutrition and Feed Science, College of Animal Science, Guizhou University, Guiyang 550025, China
2. State Key Laboratory of Animal Nutrition and Feeding, College of Animal Science and Technology, China Agricultural University, Beijing 100193, China
3. College of Animal Science, South China Agricultural University/Guangdong Provincial Key Laboratory of Animal Nutrition Control/Guangdong Laboratory for Lingnan Modern Agriculture/State Key Laboratory of Swine and Poultry Breeding Industry, Guangzhou 510642, China

## Sheet: Table S1
Table S1. Composition and nutrient contents of basal diet (%, dry matter basis)
Items		Different periods
		50-75 kg	76-100 kg	101-135 kg
Ingredients (%)
Corn		79.24	83.52	87.24
Soybean meal (46%)		16.5	12.5	9
Yeast+ Se-enriched yeast		0.25	0.25	0.25
Soybean oil		0.5	0.5	0.5
NaCl		0.4	0.4	0.4
Dicalcium phosphase		0.9	0.75	0.6
Limestone flour		1	0.9	0.9
L-Lysine		0.4	0.4	0.35
DL-Methionine		0.07	0.04	0.02
L-Threonine		0.1	0.1	0.1
Tyrosine		0.02	0.02	0.02
Available P		0.02	0.02	0.02
Vitamin premix1）		0.03	0.03	0.03
Mineral premix2）		0.1	0.1	0.1
Functional enzyme		0.37	0.3	0.3
Chloride choline（50%）		0.1	0.1	0.1
Total		100	100	100
Nutrient level3）
Crude protein (%)		15.81	14.75	13.12
ME（Mcal/kg）		3302	3359	3367
Calcium (%)		0.76	0.72	0.61
Total phosphorus (%)		0.39	0.35	0.33
STTD phosphorus	0.3		0.26	0.23
SID lysine	0.9		0.81	0.68
SID methionine	0.29		0.24	0.21
SID threonine	0.54		0.48	0.44
SID tryptophan	0.16		0.14	0.12
SID valine	0.57		0.51	0.45
Note: The vitamin and mineral premix provided the following per kg of diet：1）Vitamin premix: VA 9,300 IU，VD3 2,100 IU, VE 22.5 mg, VK3 3.75 mg, VB1 2.25 mg, VB2 7.5 mg, VB6 6 mg, VB12 0.03 mg, niacin 30 mg. Pantothenic acid 11.25 mg，folic acid 7.5 mg，biotin 0.06 mg. 2）Mineral premix: Fe 90 mg，Co 0.3mg，Cu 12 mg，Zn 60 mg，Mn 52.5 mg，I 0.525 mg. 3）Crude protein, Calcium and Phosphorus were analyzed v…

## Sheet: Table S2
Table S2. Primer used for quantitative-rea ltime PCR
Gene	Primer sequence (5'→3')	PCR product (bp)	Accession No.
RLBP1	F: TGCTGCCTTGGCAGATTCC	241	XM_003356660.4
	R: TTTGGTTGTAAGCCGCTCCA
ANKRD1	F: TGCTCGGGATAAGTTGCTCA	190	NM_213922.1
	R: GGCGCCATACGTAATCAGGA
FLNC	F: GTTCCGTTGCACATACAGGC	120	XM_003134700.5
	R: TTGGGGTTACAGGCTTCTGC
	R: GGGTTCTTAGGGCCTTAATTCTCA
BMP2	F: ACCTGTACCGCCGACATTC	120
	R: GTTCTTCCAAAGATTCTTCGTGG		XM_013985060.2
	R: CGACATCCGCATCCTGAAAG
β-actin	F: TTCTAGGCGGACTTGCAGC	128	XM_021086047.1
	R: GCTTCTCAGCAGACAGGAGG

## Sheet: Table S3
Table S3. Metabolimc profile of LD muscle in SeD, CT, and SY3.
Metabolite	LipidIon	Category	Class	Class name	FattyAcid	CalcMz	Rt	IonFormula	Mode	RSD	SY3_4	SY3_1	SD_1	SD_6	CT_3	CT_1	CT_2	SY3_2	SD_3	CT_4	SY3_3	SD_2	SY3_6	CT_5	SD_4	SD_5	CT_6	SY3_5
AcCa(14:0)	AcCa(14:0)+H	FA	AcCa	Acyl Carnitine	(14:0)	372.311	124.008	C21 H42 O4 N1	pos	0.0122211	6.9465	7.1562	7.7356	7.5486	7.2739	7.5332	7.3189	6.9509	7.5761	7.4796	6.8429	7.3285	6.7818	7.4395	7.4829	7.0953	6.9209	7.1294
AcCa(14:1)	AcCa(14:1)+H	FA	AcCa	Acyl Carnitine	(14:1)	370.295	106.86	C21 H40 O4 N1	pos	0.0129659	6.7836	7.0823	7.5412	7.5254	7.2157	7.4463	7.0872	6.7727	7.4759	7.3343	6.8434	7.1917	6.7119	7.2733	7.411	6.9479	6.8535	7.0668
AcCa(16:0)	AcCa(16:0)+H	FA	AcCa	Acyl Carnitine	(16:0)	400.342	166.65	C23 H46 O4 N1	pos	0.0147176	7.7804	8.1114	8.4674	8.2788	8.096	8.3437	8.3138	7.7698	8.3584	8.3876	7.6877	8.0115	7.5772	8.3185	8.3432	7.8885	7.6476	7.9726
AcCa(16:1)	AcCa(16:1)+H	FA	AcCa	Acyl Carnitine	(16:1)	398.327	151.405	C23 H44 O4 N1	pos	0.0637939	6.34	6.8123	7.0212	7.0416	6.742	6.8499	6.5706	6.3543	6.8518	6.9539	6.4611	6.6293	6.2642	6.7791	7.0089	6.4615	6.3503	6.5586
AcCa(17:0)	AcCa(17:0)+H	FA	AcCa	Acyl Carnitine	(17:0)	414.358	199.09	C24 H48 O4 N1	pos	0.0122956	6.2124	6.6453	6.7014	6.1188	6.3919	6.5519	6.4062	6.1099	6.7378	6.5634	5.9686	6.1669	5.8708	6.5557	6.6579	6.1463	5.8476	6.2344
AcCa(17:1)	AcCa(17:1)+H	FA	AcCa	Acyl Carnitine	(17:1)	412.342	150.683	C24 H46 O4 N1	pos	0.019468	5.8319	6.3775	6.6079	6.2508	6.0294	6.3003	5.9857	5.8849	6.5975	6.3156	5.8388	6.0957	5.7111	6.353	6.6269	6.1285	5.4643	5.9653
AcCa(18:0)	AcCa(18:0)+H	FA	AcCa	Acyl Carnitine	(18:0)	428.373	238.827	C25 H50 O4 N1	pos	0.0077002	7.2696	7.4752	8.1503	7.8298	7.6337	7.8585	7.8126	7.2904	7.87	7.9615	7.1667	7.5813	7.0035	7.6934	7.7747	7.3297	7.2027	7.4204
AcCa(18:1)	AcCa(18:1)+H	FA	AcCa	Acyl Carnitine	(18:1)	426.358	218.173	C25 H48 O4 N1	pos	0.0401974	6.0787	6.2594	7.0058	7.2435	6.2371	6.6744	7.0933	6.1011	7.3809	7.4979	6.0579	6.4624	5.9246	6.4958	6.4623	6.1092	5.7393	6.0841
AcCa(18:2)	AcCa(18:2)+H	FA	AcCa	Acyl Carnitine	(18:2)	424.342	139.945	C25 H46 O4 N1	pos	0.00301285	7.6087	7.9283	8.2573	8.0042	7.957	8.0327	7.931	7.7474	8.2395	8.2769	7.5013	7.8368	7.4063	8.199	8.0829	7.6641	7.4862	7.8191
AcCa(18:3)	AcCa(18:3)+H	FA	AcCa	Acyl Carnitine	(18:3)	422.327	120.251	C25 H44 O4 N1	pos	0.0240806	6.5173	6.9006	7.139	6.9696	6.7581	6.8511	6.8955	6.7415	7.1818	7.0766	6.4936	6.8478	6.4692	7.1486	7.1791	6.5522	6.4246	6.7456
AcCa(20:0)	AcCa(20:0)+H	FA	AcCa	Acyl Carnitine	(20:0)	456.405	349.047	C27 H54 O4 N1	pos	0.0121922	6.0752	6.0105	7.4086	7.067	6.3531	6.8509	6.4721	6.3392	7.0533	6.4755	6.2689	6.5774	6.0015	6.1937	6.5025	6.3815	6.0756	5.9117
AcCa(20:1)	AcCa(20:1)+H	FA	AcCa	Acyl Carnitine	(20:1)	454.389	248.556	C27 H52 O4 N1	pos	0.00950071	6.2672	6.3451	7.6887	7.1765	6.4826	6.921	6.7458	6.4051	7.1179	6.7961	6.3328	6.7612	6.2781	6.5321	6.8757	6.5432	5.9585	6.261
AcCa(20:2)	AcCa(20:2)+H	FA	AcCa	Acyl Carnitine	(20:2)	452.373	189.274	C27 H50 O4 N1	pos	0.010512	5.8969	6.0015	7.0892	6.5923	6.3404	6.3071	6.3019	6.0744	6.6329	6.4756	5.9657	6.3812	5.6344	6.1934	6.3059	5.9533	5.4859	6.005
AcCa(20:4)	AcCa(20:4)+H	FA	AcCa	Acyl Carnitine	(20:4)	448.342	135.257	C27 H46 O4 N1	pos	0.0100408	6.6472	6.8431	7.0362	7.0212	6.9176	6.9173	6.9071	6.6013	7.1732	7.413	6.5809	6.8904	6.3719	7.151	7.1652	6.5436	6.4802	6.8336
AcCa(22:1)	AcCa(22:1)+H	FA	AcCa	Acyl Carnitine	(22:1)	482.42	354.007	C29 H56 O4 N1	pos	0.0206263	5.5468	6.4166	6.9795	6.5976	6.7028	6.5194	5.9875	5.7946	6.6797	5.9445	5.6852	5.9736	5.4829	5.2331	6.7654	5.9573	6.416	5.1344
AcCa(6:0)	AcCa(6:0)+H	FA	AcCa	Acyl Carnitine	(6:0)	260.186	73.6967	C13 H26 O4 N1	pos	0.0235439	6.7219	6.6828	7.2343	7.5277	6.9181	6.9804	6.7636	6.8277	7.306	6.8266	6.8783	7.0167	6.5876	6.9242	6.8047	6.6858	6.9764	6.388
Cer(d18:0/22:0)	Cer(d18:0/22:0)+H	SP	Cer	Ceramides	(d18:0/22:0)	624.629	933.479	C40 H82 O3 N1	pos	0.0177446	6.3554	6.5451	6.3047	6.702	6.5614	6.3942	6.9473	6.5817	6.4943	6.7786	6.5438	6.3586	6.2438	6.6099	6.528	6.1341	6.4981	6.3482
Cer(d18:0/20:0)	Cer(d18:0/20:0)+H	SP	Cer	Ceramides	(d18:0/20:0)	596.598	859.044	C38 H78 O3 N1	pos	0.00282468	6.0332	6.2316	6.1457	6.5011	6.2694	6.1888	6.6261	6.2276	6.3245	6.4889	6.2906	6.1382	5.9582	6.3732	6.4457	5.9747	6.3005	6.108
Cer(m18:0/22:0)	Cer(m18:0/22:0)+H	SP	Cer	Ceramides	(m18:0/22:0)	608.634	973.509	C40 H82 O2 N1	pos	0.0485203	5.957	6.2781	5.989	6.236	6.0956	5.9244	6.0422	5.9841	5.7755	6.2402	6.0789	6.096	6.1539	6.122	6.1461	5.8001	5.9812	5.9986
Cer(d18:0/24:1)	Cer(d18:0/24:1)+H	SP	Cer	Ceramides	(d18:0/24:1)	650.645	928.034	C42 H84 O3 N1	pos	0.0139327	6.1824	6.3723	6.076	6.4983	6.3501	6.1869	6.9432	6.3534	6.0266	6.5157	6.3004	6.2807	6.0688	6.3659	6.0128	5.8431	6.2144	6.1133
Cer(m19:0/22:2)	Cer(m19:0/22:2)+H	SP	Cer	Ceramides	(m19:0/22:2)	618.618	944.274	C41 H80 O2 N1	pos	0.0249527	7.0445	7.1947	7.0455	7.1963	7.2273	7.127	7.6528	7.1595	7.0854	7.257	7.2217	7.0782	6.7895	7.2722	7.0882	6.8242	7.1278	7.2149
Cer(d18:1/17:0)	Cer(d18:1/17:0)+H	SP	Cer	Ceramides	(d18:1/17:0)	552.535	735.803	C35 H70 O3 N1	pos	0.0420379	6.5397	6.7124	6.5761	6.2835	6.3043	6.5611	7.0053	6.4778	6.6366	6.6218	6.3573	6.3477	6.0916	6.4495	6.5364	6.3414	6.3938	6.6021
Cer(m18:1/18:1)	Cer(m18:1/18:1)+H	SP	Cer	Ceramides	(m18:1/18:1)	548.54	907.626	C36 H70 O2 N1	pos	0.0793525	6.8628	7.0689	6.4638	6.8944	6.9337	6.604	6.3642	6.892	6.7533	6.7576	6.7627	6.5481	6.203	6.9606	6.8297	6.7429	6.6631	6.8208
Cer(m19:0/21:2)	Cer(m19:0/21:2)+H	SP	Cer	Ceramides	(m19:0/21:2)	604.603	834.424	C40 H78 O2 N1	pos	0.199156	5.0788	6.0679	5.3739	5.5698	5.6985	5.4799	6.1216	5.3742	5.2453	6.7735	5.8119	4.9773	5.8324	5.5284	5.0872	4.9385	5.3275	5.2341
Cer(m19:0/24:2)	Cer(m19:0/24:2)+H	SP	Cer	Ceramides	(m19:0/24:2)	646.65	1022.43	C43 H84 O2 N1	pos	0.0188188	6.3918	6.5446	6.308	6.4544	6.5559	6.4082	6.7468	6.4165	6.0316	6.5427	6.4779	6.2992	6.0634	6.5881	6.3553	6.1316	6.3624	6.4114
Cer(m20:1/18:1)	Cer(m20:1/18:1)+H	SP	Cer	Ceramides	(m20:1/18:1)	576.571	834.446	C38 H74 O2 N1	pos	0.0116763	6.9048	7.0806	7.0107	7.0681	7.1997	6.9813	7.9845	6.9624	7.0616	7.2933	7.1425	6.9406	6.7592	7.1341	7.0042	6.7622	7.032	7.0124
Cer(m19:0/23:3)	Cer(m19:0/23:3)+H	SP	Cer	Ceramides	(m19:0/23:3)	630.618	915.257	C42 H80 O2 N1	pos	0.00350903	6.5692	6.792	6.4262	6.7552	6.7111	6.6033	7.0159	6.5651	6.6287	6.7694	6.6875	6.6695	6.3832	6.7211	6.5773	6.385	6.5573	6.6177
Cer(m19:0/23:4)	Cer(m19:0/23:4)+H	SP	Cer	Ceramides	(m19:0/23:4)	628.603	837.907	C42 H78 O2 N1	pos	0.0146531	6.747	7.0164	6.7741	7.0239	6.8838	6.7724	7.9762	6.734	6.9548	7.029	6.7874	6.8522	6.6121	6.8051	6.8173	6.6	6.689	6.8246
Cer(d15:2/18:2+2O)	Cer(d15:2/18:2+2O)+H	SP	Cer	Ceramides	(d15:2/18:2+2O)	550.447	182.977	C33 H60 O5 N1	pos	0.00888195	6.9182	7.1576	7.0332	7.2134	7.3996	6.898	7.1558	7.1916	7.3628	7.0604	6.9151	7.0444	7.3851	7.2902	8.1705	6.9006	6.8773	7.2264
Cer(d18:0/18:0)	Cer(d18:0/18:0)+H	SP	Cer	Ceramides	(d18:0/18:0)	568.566	804.744	C36 H74 O3 N1	pos	0.0122601	7.0566	7.1256	7.0375	7.4375	7.2366	7.2045	6.8232	7.4949	6.9524	7.163	7.2031	7.1428	6.9467	7.2621	7.4324	6.7609	7.1743	7.2574
Cer(t34:0)	Cer(t34:0)+H	SP	Cer	Ceramides	(t34:0)	556.53	568.938	C34 H70 O4 N1	pos	0.0405565	7.3063	7.5753	7.2986	7.6696	7.5297	7.3256	7.3573	7.4946	7.6811	7.8642	7.3494	7.6996	7.194	7.553	7.9023	7.2814	7.3411	7.8811
Cer(t36:0+O)	Cer(t36:0+O)+H	SP	Cer	Ceramides	(t36:0+O)	600.556	523.5	C36 H74 O5 N1	pos	0.00879271	6.3512	6.5211	6.2786	6.6251	6.5343	6.2592	6.2642	6.4343	6.6379	6.5773	6.2724	6.4395	5.9036	6.5007	6.7824	6.2977	6.2287	6.7407
Cer(t38:4)	Cer(t38:4)+Na	SP	Cer	Ceramides	(t38:4)	626.512	782.422	C38 H69 O4 N1 Na1	pos	0.0335268	7.1299	7.1708	7.0344	7.5649	7.3552	7.3089	6.7253	7.2847	7.3722	7.1126	7.1892	7.1624	6.7831	7.4171	7.553	6.9601	7.3824	7.2218
Cer(d18:0/23:0)	Cer(d18:0/23:0)+H	SP	Cer	Ceramides	(d18:0/23:0)	638.645	971.808	C41 H84 O3 N1	pos	0.018046	6.0399	6.2412	6.0319	6.3568	6.7395	6.0595	6.4479	6.2334	6.7878	6.3677	6.1562	6.1284	5.9382	6.2852	6.5065	5.857	6.2387	5.9876
Cer(d34:0)	Cer(d34:0)+H	SP	Cer	Ceramides	(d34:0)	540.535	670.038	C34 H70 O3 N1	pos	0.0347355	8.8077	8.9776	8.6738	9.0391	9.0502	8.7885	8.7329	8.984	9.187	9.0374	8.8647	8.9157	8.6765	9.0508	9.393	8.7737	8.7888	9.0135
Cer(d34:1)	Cer(d34:1)+H	SP	Cer	Ceramides	(d34:1)	538.519	597.639	C34 H68 O3 N1	pos	0.0192965	7.6636	7.9003	7.5563	7.9463	7.8737	7.6454	7.6257	7.7823	7.9387	7.9244	7.723	7.7177	7.6474	7.7965	8.27	7.583	7.5693	7.9505
Cer(d18:2/26:0)	Cer(d18:2/26:0)+H	SP	Cer	Ceramides	(d18:2/26:0)	676.66	935.613	C44 H86 O3 N1	pos	0.00296518	6.2231	6.5033	6.1693	6.5419	6.4687	6.2685	6.2287	6.3037	6.6795	6.3911	6.1372	6.185	5.8858	6.4012	6.7251	6.1305	6.3775	6.2346
Cer(d18:2/26:0+O)	Cer(d18:2/26:0+O)+H	SP	Cer	Ceramides	(d18:2/26:0+O)	692.655	897.48	C44 H86 O4 N1	pos	0.0165343	6.0828	6.3434	6.2099	6.7664	6.4491	6.2172	6.8724	6.4223	6.7193	6.7607	6.43	6.2871	5.9725	6.4848	6.8925	6.2413	6.2472	6.2004
Cer(d20:0/18:0)	Cer(d20:0/18:0)+H	SP	Cer	Ceramides	(d20:0/18:0)	596.598	820.005	C38 H78 O3 N1	pos	0.0199952	7.3064	7.4084	7.2724	7.6026	7.5321	7.3997	7.341	7.4363	7.6125	7.6346	7.342	7.5632	7.2371	7.526	7.9477	7.1996	7.3683	7.3046
Cer(d22:0/18:0)	Cer(d22:0/18:0)+H	SP	Cer	Ceramides	(d22:0/18:0)	624.629	902.212	C40 H82 O3 N1	pos	0.0330088	6.7143	6.9521	6.6507	7.0795	7.0574	6.8538	7.2567	6.8679	7.1119	7.1686	6.805	6.9302	6.6876	6.946	7.4662	6.7581	6.868	6.6784
Cer(d12:0/18:0+O)	Cer(d12:0/18:0+O)+H	SP	Cer	Ceramides	(d12:0/18:0+O)	500.467	398.473	C30 H62 O4 N1	pos	0.0237073	6.0134	6.2314	6.0138	6.3175	6.3445	5.92	6.1159	6.1961	6.4003	6.4523	5.992	6.2931	6.0955	6.2906	6.8953	5.8991	5.9846	5.983
Cer(t18:1/23:2)	Cer(t18:1/23:2)+H	SP	Cer	Ceramides	(t18:1/23:2)	648.592	859.04	C41 H78 O4 N1	pos	0.0418871	6.4044	6.5519	6.281	6.5158	6.2628	6.296	6.726	6.2189	6.439	6.4408	6.4149	6.2516	6.0553	6.3854	6.5649	6.0163	6.262	6.386
Cer(d32:0)	Cer(d32:0)+H	SP	Cer	Ceramides	(d32:0)	512.504	587.303	C32 H66 O3 N1	pos	0.0216038	8.8334	9.0509	8.7828	9.1325	9.0066	8.8197	8.8254	8.9813	9.1645	9.174	8.9058	9.0139	8.827	9.089	9.5618	8.8064	8.785	9.2067
Cer(d32:1)	Cer(d32:1)+H	SP	Cer	Ceramides	(d32:1)	510.488	511.658	C32 H64 O3 N1	pos	0.0252846	6.1384	6.3468	6.017	6.135	6.2437	6.0679	6.1258	6.2077	6.3779	6.1138	6.0221	5.9083	5.9892	6.4154	6.9359	5.9113	5.8365	6.0221
Cer(d33:0)	Cer(d33:0)+H	SP	Cer	Ceramides	(d33:0)	526.519	630.064	C33 H68 O3 N1	pos	0.0523516	6.5162	6.8511	6.4384	7.1705	7.2385	6.5821	6.4242	6.6454	7.059	6.9575	6.5119	6.7062	6.2744	6.6298	7.3666	6.5229	6.6565	6.8172
Cer(d33:4+O)	Cer(d33:4+O)+H	SP	Cer	Ceramides	(d33:4+O)	534.452	227.814	C33 H60 O4 N1	pos	0.0107736	7.3592	7.6117	7.3733	7.7161	7.661	7.3524	7.3571	7.5126	7.7404	7.587	7.3988	7.4714	7.1976	7.6295	7.958	7.3492	7.3644	7.6481
Cer(d36:0)	Cer(d36:0)+H	SP	Cer	Ceramides	(d36:0)	568.566	743.257	C36 H74 O3 N1	pos	0.00865431	7.7117	7.8175	7.5925	7.8925	7.9771	7.7456	7.6176	7.8606	8.1271	8.0652	7.7361	7.9097	7.6567	7.9416	8.4971	7.6613	7.701	7.7001
Cer(m19:0/23:2)	Cer(m19:0/23:2)+H	SP	Cer	Ceramides	(m19:0/23:2)	632.634	982.955	C42 H82 O2 N1	pos	0.0264598	7.6935	7.9049	7.6998	7.7202	7.89	7.7246	8.3794	7.7071	7.7082	7.8898	7.8149	7.7365	7.4727	7.8785	7.6821	7.4344	7.7329	7.8238
Cer(d34:2)	Cer(d34:2)+H	SP	Cer	Ceramides	(d34:2)	536.504	528.242	C34 H66 O3 N1	pos	0.0149198	6.8436	6.9577	6.4665	7.0599	6.9759	6.6734	6.6859	6.8858	7.0981	6.7144	6.724	6.6823	6.323	6.8361	7.4533	6.6606	6.5068	6.7065
Cer(d30:0)	Cer(d30:0)+H	SP	Cer	Ceramides	(d30:0)	484.472	513.627	C30 H62 O3 N1	pos	0.0178413	7.0174	7.228	7.0331	7.3762	7.1986	7.01	7.009	7.1841	7.3348	7.2868	7.0524	7.1272	6.9967	7.2689	7.6923	6.9376	7.0125	6.9023
Cer(d38:1)	Cer(d38:1)+H	SP	Cer	Ceramides	(d38:1)	594.582	752.383	C38 H76 O3 N1	pos	0.043344	6.8235	6.9734	6.4223	7.2329	6.8888	6.8077	6.5626	6.9734	7.1215	7.2089	6.885	7.0182	6.9317	7.0693	7.656	6.7963	6.8453	6.8566
Cer(d42:3)	Cer(d42:3)+H	SP	Cer	Ceramides	(d42:3)	646.613	933.212	C42 H80 O3 N1	pos	0.0251865	6.2031	6.3927	6.0346	6.5122	6.3742	6.2644	6.5313	6.4381	6.3401	6.6416	6.3947	6.2661	6.1015	6.5518	6.3594	5.9964	6.3484	6.2003
Cer(d28:0)	Cer(d28:0)+H	SP	Cer	Ceramides	(d28:0)	456.441	396.995	C28 H58 O3 N1	pos	0.0169865	6.3668	6.4807	6.2896	6.5914	6.6645	6.2252	6.352	6.4741	6.5982	6.5497	6.2858	6.4315	6.2537	6.5877	7.01	6.2316	6.2676	6.5652
Cer(m38:2)	Cer(m38:2)+NH4	SP	Cer	Ceramides	(m38:2)	593.598	862.347	C38 H77 O2 N2	pos	0.00201411	6.9346	6.7614	6.6559	7.0565	6.8876	6.7098	6.789	6.8046	7.057	6.6395	6.6812	6.6546	6.2709	6.8429	7.1807	6.6039	6.8059	6.7029
Cer(m18:0/18:0)	Cer(m18:0/18:0)+H	SP	Cer	Ceramides	(m18:0/18:0)	552.571	825.186	C36 H74 O2 N1	pos	0.00830443	6.7021	7.1028	6.7445	7.0488	6.9668	6.8618	6.6275	6.919	6.7923	6.8461	6.8181	6.8789	6.6333	6.9201	6.8968	6.3639	6.7705	6.8547
Cer(d44:5)	Cer(d44:5)+H	SP	Cer	Ceramides	(d44:5)	670.613	915.096	C44 H80 O3 N1	pos	0.00775251	6.8613	7.0812	6.6617	7.0099	6.957	6.9142	7.0893	6.838	6.8506	7.1087	7.0081	6.9719	6.6021	7.0625	6.8557	6.7006	6.8863	6.9359
Cer(m32:0)	Cer(m32:0)+NH4	SP	Cer	Ceramides	(m32:0)	513.535	670.541	C32 H69 O2 N2	pos	0.0242373	9.03	9.2074	9.0725	9.3886	9.3256	9.1687	9.0112	9.1833	9.4674	9.0671	9.0986	9.047	8.685	9.2996	9.5814	8.9379	9.2341	9.1305
Cer(m44:3)	Cer(m44:3)+Na	SP	Cer	Ceramides	(m44:3)	680.632	1353.9	C44 H83 O2 N1 Na1	pos	0.00372441	7.2326	7.7105	7.2789	7.9681	7.8815	7.4165	7.4199	7.6116	7.7649	7.3364	7.4493	7.4565	6.3632	7.9181	7.8404	6.5026	7.4037	7.5645
Cer(d42:5)	Cer(d42:5)+H	SP	Cer	Ceramides	(d42:5)	642.582	841.288	C42 H76 O3 N1	pos	0.00772059	6.4379	6.4871	6.382	6.5996	6.4859	5.944	6.3985	5.7855	6.487	6.8022	6.6449	6.5762	6.4457	6.697	6.442	6.3881	6.4937	6.5587
CerG3GNAc1(m37:3)	CerG3GNAc1(m37:3)+H-H2O	SP	CerG3GNAc1	Simple Glc series	(m37:3)	1231.77	546.822	C63 H111 O21 N2	pos	0.0309326	6.1567	6.3974	6.3007	6.8406	6.413	6.2424	6.2564	6.5219	6.8068	6.2315	6.3111	6.1971	5.8053	6.3721	6.7687	5.9964	6.4055	6.2751
CerP(m19:0/15:0)	CerP(m19:0/15:0)+H	SP	CerP	Ceramides phosphate	(m19:0/15:0)	604.506	767.327	C34 H71 O5 N1 P1	pos	0.0101372	7.4722	7.5351	7.402	7.7368	7.4519	7.5724	7.2595	7.6141	7.6175	7.4238	7.4939	7.4766	7.1256	7.6575	7.6521	7.1768	7.529	7.5516
CL(78:6)	CL(78:6)+H	GP	CL	Cardiolipin	(78:6)	1538.1	645.29	C87 H159 O17 P2	pos	0.0223602	8.0537	8.1161	7.9761	8.6841	8.4903	8.127	8.0093	8.1404	8.7957	8.0215	8.033	7.9907	7.6508	8.3524	8.6083	8.0644	8.3111	8.0932
Co(Q10)	Co(Q10)+NH4	PR	Co	Coenzyme	(Q10)	880.718	1097.5	C59 H94 O4 N1	pos	0.0183085	6.6465	7.0457	6.5913	6.7373	7.0421	6.9827	6.6072	6.6979	6.4109	7.1826	6.8346	6.8957	6.8461	6.8315	6.5125	6.3302	6.8363	6.7973
Co(Q9)	Co(Q9)+NH4	PR	Co	Coenzyme	(Q9)	812.655	1001.69	C54 H86 O4 N1	pos	0.00910088	6.9612	7.3676	7.2854	7.3251	7.333	7.4262	7.155	7.0626	6.7215	7.302	7.0777	7.2373	6.9916	7.3477	6.9328	6.9228	7.1097	7.2782
DG(20:1)	DG(20:1)+NH4	GL	DG	diglyceride	(20:1)	416.337	130.11	C23 H46 O5 N1	pos	0.0139596	6.3936	6.7328	7.1646	7.1682	6.8896	7.0164	6.5892	6.4452	7.0398	7.0158	6.4187	6.6952	6.4997	6.8084	6.9612	6.7446	6.1797	6.6555
DG(20:1/18:2)	DG(20:1/18:2)+NH4	GL	DG	diglyceride	(20:1/18:2)	664.587	815.741	C41 H78 O5 N1	pos	0.0162301	7.3133	7.2057	7.312	6.9931	7.0995	7.1823	7.2543	7.2273	6.8734	7.4516	7.1027	7.3983	6.86	7.3663	7.084	6.7661	7.2903	7.0952
DG(22:1)	DG(22:1)+NH4	GL	DG	diglyceride	(22:1)	444.368	177.219	C25 H50 O5 N1	pos	0.0163759	6.4416	6.1761	7.1141	6.8186	6.3897	6.69	6.5537	5.9514	6.7689	6.5881	6.3541	6.3575	5.9158	6.3364	6.4709	6.3181	6.3413	6.0952
DG(22:2)	DG(22:2)+NH4	GL	DG	diglyceride	(22:2)	442.353	133.743	C25 H48 O5 N1	pos	0.0169008	7.126	7.518	7.5485	7.7014	7.5916	7.4066	6.9466	7.2292	7.5746	7.3449	7.1841	7.123	6.9357	7.4388	7.6689	7.2578	7.1791	7.3006
DG(20:2)	DG(20:2)+NH4	GL	DG	diglyceride	(20:2)	414.321	110.091	C23 H44 O5 N1	pos	0.0175991	6.1294	6.4464	6.9527	6.9752	6.5596	6.7769	6.4517	6.108	6.8934	6.6309	6.1805	6.4009	6.2586	6.5671	6.7338	6.508	6.3362	6.3612
DG(26:3e)	DG(26:3e)+H	GL	DG	diglyceride	(26:3e)	465.394	1061.85	C29 H53 O4	pos	0.0329345	7.3299	6.5145	7.167	6.4918	6.6614	6.7443	6.6311	6.5132	6.6703	7.0766	6.9554	7.0428	7.4646	6.5495	6.3239	7.2873	6.7255	7.0506
DG(27:3)	DG(27:3)+H	GL	DG	diglyceride	(27:3)	493.389	861.933	C30 H53 O5	pos	0.0357368	6.526	6.2693	6.6058	6.3874	6.546	6.3308	7.4071	6.2189	6.589	6.4303	6.3791	6.2474	6.2024	6.2438	6.4263	6.5286	6.4181	6.4729
DG(28:2e)	DG(28:2e)+H	GL	DG	diglyceride	(28:2e)	495.441	1209.38	C31 H59 O4	pos	0.019991	7.7743	6.846	7.5855	6.9879	7.0634	7.3382	7.2099	7.3881	7.3275	7.5755	7.5677	7.6479	7.8919	7.0303	6.8881	7.8335	7.3663	7.6433
DG(19:4e)	DG(19:4e)+H	GL	DG	diglyceride	(19:4e)	365.269	147.76	C22 H37 O4	pos	0.00339095	6.9022	7.2019	7.1823	7.6273	7.537	7.1517	6.9387	6.9605	7.3473	7.0441	6.9706	6.9154	6.5071	7.1622	7.4968	6.689	7.2756	6.8069
DG(28:4)	DG(28:4)+H	GL	DG	diglyceride	(28:4)	505.389	406.616	C31 H53 O5	pos	0.0256725	5.8639	6.194	6.385	6.3854	6.3523	6.093	6.3734	6.1319	6.5684	6.1895	5.8793	6.1571	5.681	6.1719	6.4745	5.9195	6.0602	5.9073
DG(28:4e)	DG(28:4e)+H	GL	DG	diglyceride	(28:4e)	491.409	1070.46	C31 H55 O4	pos	0.00487138	7.0731	6.2881	6.8664	6.4137	6.4587	6.5294	6.3104	6.3632	6.2664	6.8496	6.6498	6.8545	7.2362	6.3577	6.095	7.1038	6.4524	6.8072
DG(30:2e)	DG(30:2e)+H	GL	DG	diglyceride	(30:2e)	523.472	1216.11	C33 H63 O4	pos	0.0560528	7.0432	6.4084	7.2186	6.6794	6.6752	6.7544	7.1526	6.8739	6.8621	7.0645	7.143	6.987	7.0605	6.5186	6.6258	7.2808	6.6316	7.0627
DG(28:3e)	DG(28:3e)+H	GL	DG	diglyceride	(28:3e)	493.425	1134.06	C31 H57 O4	pos	0.0124532	8.0229	7.065	7.6362	7.2126	7.3141	7.406	7.3239	7.3451	7.2779	7.8199	7.6508	7.7733	8.1573	7.2805	7.0398	8.0091	7.4038	7.6869
DG(23:1/11:1)	DG(23:1/11:1)+NH4	GL	DG	diglyceride	(23:1/11:1)	610.54	782.417	C37 H72 O5 N1	pos	0.0419594	7.9325	7.953	7.8317	8.2884	8.097	8.0131	7.6465	8.0497	7.9986	7.8958	7.9278	7.9207	7.5709	8.1643	8.1885	7.5917	8.0771	7.99
DG(32:3e)	DG(32:3e)+H	GL	DG	diglyceride	(32:3e)	549.488	574.939	C35 H65 O4	pos	0.112087	5.8326	6.4433	5.9072	6.3682	5.915	6.0698	6.4638	5.9241	6.0891	5.7019	5.8164	5.9064	5.6195	5.8323	5.8579	5.1887	5.6721	5.7096
DG(32:4e)	DG(32:4e)+H	GL	DG	diglyceride	(32:4e)	547.472	1142.05	C35 H63 O4	pos	0.0979643	6.2624	5.995	6.7276	5.7292	5.9234	6.0482	6.5289	6.0716	5.6928	6.6636	6.4618	6.2708	6.8436	5.6956	5.2925	6.913	5.8188	6.7857
DG(22:3)	DG(22:3)+NH4	GL	DG	diglyceride	(22:3)	440.337	115.927	C25 H46 O5 N1	pos	0.018529	6.2781	6.6237	6.8614	6.9045	6.71	6.7858	6.2974	6.2991	6.8823	6.921	6.2827	6.5625	6.4334	6.7063	6.7801	6.6535	6.0811	6.527
DG(26:2e)	DG(26:2e)+H	GL	DG	diglyceride	(26:2e)	467.409	1132.25	C29 H55 O4	pos	0.00348307	7.474	6.6827	7.2434	6.7527	6.8564	7.0644	6.8858	7.0096	7.0421	7.3402	7.2296	7.3617	7.6593	6.7781	6.6817	7.5686	7.0201	7.2757
DG(34:2e)	DG(34:2e)+H	GL	DG	diglyceride	(34:2e)	579.535	1505.2	C37 H71 O4	pos	0.0401429	8.5224	7.0194	8.0696	7.5048	7.0012	8.0388	7.4896	7.5725	7.6097	8.8791	8.0443	8.1435	8.1043	7.2894	7.1015	8.6137	8.5704	7.7758
DG(34:3e)	DG(34:3e)+H	GL	DG	diglyceride	(34:3e)	577.519	619.086	C37 H69 O4	pos	0.0275518	6.8931	7.408	7.1841	7.5624	7.2265	7.2526	7.1036	7.1324	7.4162	7.0485	7.0582	6.9609	6.6583	7.131	7.0663	6.6721	7.066	7.0183
DG(34:4e)	DG(34:4e)+H	GL	DG	diglyceride	(34:4e)	575.503	999.975	C37 H67 O4	pos	0.0397804	7.2987	7.0208	7.1026	7.0559	6.9027	6.8267	7.0131	6.7729	6.9571	7.1594	7.0854	7.1591	7.3842	6.702	6.8083	7.4593	7.064	7.0956
DG(34:5e)	DG(34:5e)+H	GL	DG	diglyceride	(34:5e)	573.488	1234.43	C37 H65 O4	pos	0.0462589	7.4205	6.8937	7.4408	6.8843	6.9449	7.2821	7.4886	7.293	6.9874	7.4222	7.3127	7.4266	7.6944	7.0383	6.9738	7.6366	7.0762	7.3948
DG(35:2e)	DG(35:2e)+H	GL	DG	diglyceride	(35:2e)	593.55	1397.2	C38 H73 O4	pos	0.0021799	7.1384	6.608	7.1378	6.3846	6.3885	6.9505	6.9298	6.8132	7.0621	7.0304	7.1148	6.9985	7.202	6.6262	6.7204	7.1729	6.2427	6.9607
DG(35:3)	DG(35:3)+H	GL	DG	diglyceride	(35:3)	605.514	847.635	C38 H69 O5	pos	0.0243936	6.3292	6.5109	6.1877	6.321	6.255	6.347	6.3095	6.4528	6.414	6.3963	6.4533	6.2849	5.9706	6.6024	6.6236	6.107	6.3177	6.3336
DG(36:2e)	DG(36:2e)+H	GL	DG	diglyceride	(36:2e)	607.566	1620.75	C39 H75 O4	pos	0.119593	7.2212	6.8206	7.4893	7.4674	6.5503	6.8526	6.6137	6.8741	6.926	7.6688	7.1869	7.4298	6.7138	7	6.8661	7.0231	7.3463	7.0186
DG(36:3e)	DG(36:3e)+H	GL	DG	diglyceride	(36:3e)	605.55	768.365	C39 H73 O4	pos	0.0180129	6.9822	7.3777	7.0847	7.3649	7.1567	7.1493	7.2514	7.2043	7.1102	7.2225	7.1653	7.1187	6.9943	7.1786	7.0648	6.8296	7.1472	7.1275
DG(36:4e)	DG(36:4e)+H	GL	DG	diglyceride	(36:4e)	603.535	721.652	C39 H71 O4	pos	0.0102471	7.8156	8.1065	7.9592	8.3215	8.0607	8.1404	7.6487	8.0392	7.9465	7.9519	8.0216	7.9417	7.6769	8.0213	7.8311	7.6135	8.0698	7.9811
DG(36:5e)	DG(36:5e)+H	GL	DG	diglyceride	(36:5e)	601.519	1066.65	C39 H69 O4	pos	0.0524882	6.8097	6.5703	6.6233	6.6843	6.5845	6.5654	7.2316	6.3867	6.7261	6.7152	6.4972	6.7743	6.8331	6.3465	6.4704	6.802	6.4837	6.6162
DG(36:6e)	DG(36:6e)+H	GL	DG	diglyceride	(36:6e)	599.503	1266.65	C39 H67 O4	pos	0.0242519	6.899	6.4094	6.7736	6.1859	6.3422	6.4287	6.5934	6.365	6.305	6.934	6.5191	6.6964	6.9687	6.4033	6.0437	6.785	6.2911	6.7525
DG(33:2e)	DG(33:2e)+H	GL	DG	diglyceride	(33:2e)	565.519	1357.14	C36 H69 O4	pos	0.0142552	7.5072	7.0824	7.4932	6.9511	6.9313	7.3067	7.5033	7.3398	7.4677	7.3588	7.5883	7.4829	7.593	7.0944	7.1069	7.6066	7.4639	7.3802
DG(33:3e)	DG(33:3e)+H	GL	DG	diglyceride	(33:3e)	563.503	1308.06	C36 H67 O4	pos	0.0165511	7.6054	7.0212	7.498	6.9122	6.958	7.238	7.4263	7.1749	7.078	7.3171	7.5561	7.3314	7.713	6.9759	6.9168	7.5763	7.2244	7.3449
DG(38:4e)	DG(38:4e)+H	GL	DG	diglyceride	(38:4e)	631.566	859.039	C41 H75 O4	pos	0.00322738	6.8154	6.9532	6.7016	6.9397	6.7599	6.7515	6.8592	6.6838	6.504	6.7761	6.8775	6.7109	6.5283	6.9277	6.5935	6.5473	6.7362	6.8601
DG(38:5e)	DG(38:5e)+H	GL	DG	diglyceride	(38:5e)	629.55	665.88	C41 H73 O4	pos	0.0491714	7.6423	8.1131	7.7594	8.0884	7.8037	7.9177	7.7206	7.9214	7.8162	7.6404	7.8088	7.7506	7.3098	7.7275	7.752	7.3369	7.7922	7.67
DG(38:6e)	DG(38:6e)+H	GL	DG	diglyceride	(38:6e)	627.535	826.841	C41 H71 O4	pos	0.0975727	6.744	6.9339	6.7237	6.9861	6.7403	6.8517	6.9471	6.8411	6.7002	6.6377	6.9852	6.6883	6.6879	6.9816	6.6398	6.4106	6.8708	6.7422
DG(39:2)	DG(39:2)+NH4	GL	DG	diglyceride	(39:2)	680.619	875.193	C42 H82 O5 N1	pos	0.00869341	6.7124	7.1412	6.8036	7.1595	7.0367	7.0083	6.8239	7.0588	6.9059	6.8184	6.9564	6.8867	6.5363	6.9848	6.9557	6.5749	6.9988	6.8752
DG(41:4)	DG(41:4)+NH4	GL	DG	diglyceride	(41:4)	704.619	815.526	C44 H82 O5 N1	pos	0.0411947	7.167	7.1162	7.1321	6.9651	6.9869	7.2226	6.7261	7.2393	6.7995	7.2433	7.1539	7.3243	6.6676	7.2917	7.0228	6.8255	7.2739	7.1725
DG(8:0/11:2)	DG(8:0/11:2)+NH4	GL	DG	diglyceride	(8:0/11:2)	400.306	132.267	C22 H42 O5 N1	pos	0.00196471	7.9442	8.2539	7.9475	8.3131	8.2502	7.9414	7.9393	8.0608	8.3022	8.0091	7.9565	7.8413	7.5369	8.1879	8.4133	7.8823	7.9802	8.0013
DG(8:1e/11:2)	DG(8:1e/11:2)+NH4	GL	DG	diglyceride	(8:1e/11:2)	384.311	135.257	C22 H42 O4 N1	pos	0.0513648	6.7115	7.1664	6.8076	7.2121	7.2162	6.8407	6.4633	6.9573	7.0626	6.6276	6.7692	6.5832	6.3732	6.9913	7.5739	6.6818	7.2155	6.7578
DG(9:0/11:2)	DG(9:0/11:2)+NH4	GL	DG	diglyceride	(9:0/11:2)	414.321	158.089	C23 H44 O5 N1	pos	0.012727	6.404	6.5143	6.6642	6.6989	6.6637	6.3239	6.9031	6.5592	6.6805	6.3444	6.477	6.5333	5.9856	6.584	6.6981	6.2676	6.5126	6.2686
DG(32:1e)	DG(32:1e)+NH4	GL	DG	diglyceride	(32:1e)	570.546	603.637	C35 H72 O4 N1	pos	0.0135264	8.04	8.3298	8.1884	8.4957	8.3153	8.077	8.2137	8.2095	8.3297	8.0903	8.1361	8.2112	7.7736	8.3506	8.2704	7.5674	8.1089	8.2006
DG(32:2e)	DG(32:2e)+H	GL	DG	diglyceride	(32:2e)	551.503	1.5919	C35 H67 O4	pos	0.0427154	6.7595	7.0222	7.2686	7.2246	7.7072	7.3843	6.6145	6.6765	7.6814	6.5066	6.4954	7.1837	5.9726	6.6799	6.9401	6.3257	7.0791	6.3536
DG(23:5e)	DG(23:5e)+H	GL	DG	diglyceride	(23:5e)	419.316	473.25	C26 H43 O4	pos	0.074112	6.9498	6.9331	7.1065	7.3948	7.0434	6.869	7.5248	6.9387	7.3686	7.0096	7.0331	7.0935	6.4681	7.1255	7.1653	6.9691	6.779	6.8362
DG(24:2e)	DG(24:2e)+H	GL	DG	diglyceride	(24:2e)	439.378	1.7344	C27 H51 O4	pos	0.0579923	5.8887	6.8447	5.8092	7.0991	6.68	6.5808	5.8098	5.87	6.2686	5.7061	5.737	5.6873	5.2555	6.5211	6.9121	5.5715	6.2791	5.5294
DG(25:2)	DG(25:2)+H	GL	DG	diglyceride	(25:2)	467.373	860.779	C28 H51 O5	pos	0.0430237	6.7437	6.5859	6.8749	6.6758	6.7975	6.6242	7.1202	6.5557	6.9586	6.6343	6.613	6.5158	6.3834	6.4552	6.747	6.845	6.6329	6.6494
DG(16:0/16:1)	DG(16:0/16:1)+NH4	GL	DG	diglyceride	(16:0/16:1)	584.525	753.901	C35 H70 O5 N1	pos	0.0256254	6.735	6.7337	6.7152	6.7953	6.3073	6.9178	7.1627	6.6495	6.5851	6.7544	6.8686	6.7525	6.6694	6.6987	6.5999	6.6749	6.6583	6.5026
DG(16:0/18:1)	DG(16:0/18:1)+NH4	GL	DG	diglyceride	(16:0/18:1)	612.556	1492.21	C37 H74 O5 N1	pos	0.0961184	6.7085	6.8731	6.705	7.6416	6.962	6.8358	6.627	6.752	7.291	6.7221	6.6867	6.6981	6.275	6.9816	6.9965	6.4074	6.4791	6.5435
DG(16:0/18:2)	DG(16:0/18:2)+NH4	GL	DG	diglyceride	(16:0/18:2)	610.54	764.883	C37 H72 O5 N1	pos	0.0133677	7.9755	8.0093	7.9267	8.1764	8.0141	8.027	8.54	8.0405	7.8026	8.0266	8.108	8.0445	7.7596	8.0335	7.7128	7.6722	7.9581	7.8908
DG(16:1e)	DG(16:1e)+H	GL	DG	diglyceride	(16:1e)	329.269	1.8035	C19 H37 O4	pos	0.113619	6.0564	5.7532	5.4094	6.6608	6.1075	6.1934	5.3979	6.1732	5.866	5.7592	5.2942	6.0276	5.3504	6.2007	6.417	5.7754	5.1631	5.7597
DG(18:0/16:0)	DG(18:0/16:0)+NH4	GL	DG	diglyceride	(18:0/16:0)	614.572	883.263	C37 H76 O5 N1	pos	0.00687079	7.3285	7.4063	7.24	7.3849	7.2688	7.2706	7.2552	7.4207	7.2589	7.3328	7.3924	7.1822	7.0371	7.5142	7.5475	7.1734	7.2547	7.2706
DG(18:0/18:0)	DG(18:0/18:0)+NH4	GL	DG	diglyceride	(18:0/18:0)	642.603	957.492	C39 H80 O5 N1	pos	0.0506191	7.2417	7.4063	6.8759	7.3379	7.152	7.0698	7.1003	7.3354	7.3671	7.0537	7.2488	6.8867	6.7506	7.473	7.3757	7.0609	7.0615	7.1159
DG(18:0/18:1)	DG(18:0/18:1)+NH4	GL	DG	diglyceride	(18:0/18:1)	640.587	887.934	C39 H78 O5 N1	pos	0.0256721	7.2953	7.3925	7.3074	7.4286	7.2291	7.4377	7.7463	7.393	7.12	7.4351	7.4012	7.4336	7.167	7.3978	7.3126	7.0144	7.3042	7.1593
DG(18:0/18:2)	DG(18:0/18:2)+NH4	GL	DG	diglyceride	(18:0/18:2)	638.572	1914.41	C39 H76 O5 N1	pos	0.241841	5.9103	6.504	5.9551	6.4333	6.3363	6.0832	5.978	6.0315	6.5346	5.827	5.8804	5.8345	5.5327	6.0471	6.2901	5.561	5.8822	5.6873
DG(18:0/20:3)	DG(18:0/20:3)+NH4	GL	DG	diglyceride	(18:0/20:3)	664.587	868.781	C41 H78 O5 N1	pos	0.0155899	6.6528	6.5752	6.6925	6.6932	6.3154	6.4626	6.5681	6.564	6.2287	6.7036	6.4913	6.6501	6.2498	6.6681	6.5848	6.0138	6.6984	6.3279
DG(18:0/20:4)	DG(18:0/20:4)+NH4	GL	DG	diglyceride	(18:0/20:4)	662.572	815.551	C41 H76 O5 N1	pos	0.00732949	8.2756	8.1928	8.2811	7.9688	8.08	8.141	8.2486	8.1953	7.8725	8.4012	8.1039	8.3647	7.8303	8.3169	8.0476	7.7461	8.267	8.069
DG(10:0/11:2)	DG(10:0/11:2)+NH4	GL	DG	diglyceride	(10:0/11:2)	428.337	133.245	C24 H46 O5 N1	pos	0.0657145	6.9204	7.3071	6.9803	7.4486	7.4238	7.0413	6.726	7.0551	7.3322	6.907	7.0758	6.7969	6.621	7.1429	7.4458	6.8521	7.1243	7.044
DG(10:0e/10:4)	DG(10:0e/10:4)+NH4	GL	DG	diglyceride	(10:0e/10:4)	396.311	111.713	C23 H42 O4 N1	pos	0.00900329	6.4505	6.7107	7.1265	6.9966	6.8277	6.9589	6.7783	6.499	7.1219	7.052	6.4452	6.7837	6.2714	7.0248	7.019	6.627	6.3801	6.7001
DG(18:1/20:5)	DG(18:1/20:5)+H	GL	DG	diglyceride	(18:1/20:5)	641.514	768.835	C41 H69 O5	pos	0.0177859	7.9832	7.896	8.0165	8.0095	7.9418	8.1704	8.7003	8.0582	7.8678	8.0525	8.0955	8.0923	7.736	8.1029	7.8696	7.7474	7.9992	7.8648
DG(18:2/18:2)	DG(18:2/18:2)+NH4	GL	DG	diglyceride	(18:2/18:2)	634.54	719.586	C39 H72 O5 N1	pos	0.0348459	7.5982	7.5551	7.4447	7.4476	7.6925	7.6151	8.3162	7.563	7.3376	7.6496	7.5828	7.5	7.2737	7.6878	7.3023	7.1776	7.4856	7.518
DG(19:3e)	DG(19:3e)+H	GL	DG	diglyceride	(19:3e)	367.284	187.722	C22 H39 O4	pos	0.0154179	6.1667	6.5497	6.4113	6.8056	6.697	6.3366	6.2515	6.253	6.7498	6.7198	6.2821	6.1515	5.9746	6.404	6.8127	5.9924	6.4972	6.0318
DG(20:5/18:2)	DG(20:5/18:2)+H	GL	DG	diglyceride	(20:5/18:2)	639.498	1040.01	C41 H67 O5	pos	0.00406687	6.4882	7.2654	6.5877	6.8764	7.2486	7.04	5.9997	7.0943	6.2922	7.0007	6.9471	6.7936	6.082	6.7081	6.6089	6.1105	7.1621	6.7796
DG(18:1/20:4)	DG(18:1/20:4)+NH4	GL	DG	diglyceride	(18:1/20:4)	660.556	753.359	C41 H74 O5 N1	pos	0.0248031	7.1249	7.0205	6.8179	7.0661	6.825	7.0843	7.3852	6.9848	6.8082	7.2674	6.9193	7.0858	6.757	7.0558	6.9043	6.6458	6.991	6.98
DG(18:0/22:4)	DG(18:0/22:4)+NH4	GL	DG	diglyceride	(18:0/22:4)	690.603	863.836	C43 H80 O5 N1	pos	0.0090667	6.6337	6.6453	6.6929	6.5664	6.5648	6.5317	6.8047	6.5216	6.354	6.8387	6.3952	6.5732	6.2668	6.6293	6.3437	6.2197	6.6327	6.4902
DG(18:1/18:2)	DG(18:1/18:2)+NH4	GL	DG	diglyceride	(18:1/18:2)	636.556	769.077	C39 H74 O5 N1	pos	0.00352874	7.844	7.8842	7.9085	7.8959	7.8913	7.9815	8.8655	7.8994	7.7157	7.9746	7.9424	7.94	7.6685	7.9105	7.6496	7.5497	7.819	7.8052
DG(38:2e)	DG(38:2e)+H	GL	DG	diglyceride	(38:2e)	635.597	1445.28	C41 H79 O4	pos	0.0206626	7.0019	6.2283	6.6961	6.483	6.4152	7.114	6.8058	6.6982	6.8842	6.9868	7.1788	6.7371	7.1043	6.4361	6.5924	7.1184	7.3981	6.882
DG(38:3e)	DG(38:3e)+H	GL	DG	diglyceride	(38:3e)	633.582	1413.53	C41 H77 O4	pos	0.0166302	7.8373	7.0977	7.5934	7.3417	7.3806	7.3382	7.5478	7.4823	7.7587	7.6975	7.9044	7.7088	7.7684	7.2601	7.3298	7.777	7.5159	7.647
DGDG(30:4)	DGDG(30:4)+NH4	SoG1	DGDG	Digalactosyldiacylglycerol	(30:4)	874.552	569.526	C45 H80 O15 N1	pos	0.0232972	6.2854	6.453	6.4435	6.7165	6.5436	6.3241	6.4338	6.4005	6.4899	6.3206	6.3493	6.4215	6.0101	6.599	6.5774	5.7945	6.3426	6.3943
DGDG(28:4)	DGDG(28:4)+NH4	SoG1	DGDG	Digalactosyldiacylglycerol	(28:4)	846.521	589.534	C43 H76 O15 N1	pos	0.0112192	6.8032	7.413	6.9635	7.6264	7.1423	7.458	7.2726	7.3874	7.135	7.0092	7.2509	7.3401	6.8905	6.9175	7.0888	6.6503	6.9798	7.3253
GM3(m40:4)	GM3(m40:4)+H	SP	GM3	Gangliosides	(m40:4)	1215.77	596.371	C63 H111 O20 N2	pos	0.0175021	7.2741	7.6568	7.256	7.7937	7.5611	7.432	7.3161	7.4551	7.7733	7.378	7.3811	7.2828	7.0635	7.4982	7.8323	7.174	7.4167	7.5087
GM3(m38:1)	GM3(m38:1)+Na	SP	GM3	Gangliosides	(m38:1)	1215.77	580.263	C61 H112 O20 N2 Na1	pos	0.0226304	6.8656	7.2274	6.9344	7.449	7.133	7.0238	6.9232	7.0533	7.4895	6.9095	7.026	6.9385	6.5739	7.1271	7.5401	6.8656	6.9911	7.0376
GM3(m36:3)	GM3(m36:3)+H-H2O	SP	GM3	Gangliosides	(m36:3)	1143.71	561.529	C59 H103 O19 N2	pos	0.0231705	5.8741	6.217	5.8008	6.2517	6.1426	5.8832	5.8435	5.9911	6.3352	5.8617	5.9207	5.5897	5.6002	6.1602	6.3917	5.9085	5.9071	6.0284
LPC(20:4e)	LPC(20:4e)+H	GP	LPC	lysophosphatidylcholine	(20:4e)	530.361	210.499	C28 H53 O6 N1 P1	pos	0.026007	6.3555	6.545	6.2115	6.0364	6.4793	6.6111	7.2796	6.3753	6.7857	6.563	6.2361	6.5919	6.1992	6.6723	6.1219	6.1637	6.3094	6.0838
LPC(20:3)	LPC(20:3)+H	GP	LPC	lysophosphatidylcholine	(20:3)	546.355	146.637	C28 H53 O7 N1 P1	pos	0.0236793	6.1245	6.9615	6.6295	6.9408	7.545	6.564	6.8551	6.3679	6.9147	7.5081	6.5178	6.7885	6.2214	6.4941	6.6665	6.2671	7.0876	6.6209
LPC(15:0)	LPC(15:0)+H	GP	LPC	lysophosphatidylcholine	(15:0)	482.324	144.451	C23 H49 O7 N1 P1	pos	0.00416965	6.2704	6.6611	6.5961	6.8448	6.8733	6.4543	7.0654	6.4988	6.8279	6.6723	6.4117	6.5803	6.0995	6.6514	6.744	6.0324	6.6007	6.4444
LPC(22:4)	LPC(22:4)+H	GP	LPC	lysophosphatidylcholine	(22:4)	572.371	162.768	C30 H55 O7 N1 P1	pos	0.0178299	6.0234	6.6949	6.4077	6.6316	7.3398	6.3005	6.6181	5.9882	6.7559	7.4093	6.1909	6.3554	5.9154	6.3616	6.4776	6.0907	6.9704	6.4326
LPC(20:2)	LPC(20:2)+H	GP	LPC	lysophosphatidylcholine	(20:2)	548.371	178.376	C28 H55 O7 N1 P1	pos	0.0422967	5.8516	6.4443	6.3355	6.5808	6.9971	6.2292	6.4206	6.0433	6.5977	6.999	6.1824	6.3635	5.8779	6.2656	6.1688	5.8935	6.6114	6.2052
LPC(22:5)	LPC(22:5)+H	GP	LPC	lysophosphatidylcholine	(22:5)	570.355	133.95	C30 H53 O7 N1 P1	pos	0.00716075	5.7592	6.7107	6.2929	6.6225	7.3942	6.1828	6.5671	6.0277	6.6072	7.3624	6.1937	6.4338	5.8564	6.2099	6.2932	5.8635	6.9385	6.3527
LPC(37:1)	LPC(37:1)+Na	GP	LPC	lysophosphatidylcholine	(37:1)	810.635	743.038	C45 H90 O7 N1 P1 Na1	pos	0.0535462	7.3489	7.6347	7.5041	6.9511	7.3263	7.519	7.2878	7.3095	7.3276	7.3579	7.3606	7.2666	6.9922	7.6624	7.2731	7.0921	7.4337	7.3822
LPC(34:0)	LPC(34:0)+Na	GP	LPC	lysophosphatidylcholine	(34:0)	770.603	788.601	C42 H86 O7 N1 P1 Na1	pos	0.0150377	7.4684	7.7673	7.3143	7.6865	7.6989	7.6228	7.6939	7.6757	7.6345	7.5906	7.7976	7.6184	7.3624	7.8213	7.5363	7.0969	7.6315	7.5435
LPC(35:1)	LPC(35:1)+Na	GP	LPC	lysophosphatidylcholine	(35:1)	782.603	702.21	C43 H86 O7 N1 P1 Na1	pos	0.0110132	8.0254	8.5642	8.1854	7.8911	8.349	8.272	8.1125	8.1174	8.1052	8.1497	8.1711	8.1517	7.8017	8.3809	8.0912	7.7378	8.228	8.165
LPC(36:1)	LPC(36:1)+Na	GP	LPC	lysophosphatidylcholine	(36:1)	796.619	792.088	C44 H88 O7 N1 P1 Na1	pos	0.00815827	7.4123	7.821	7.337	7.5655	7.5612	7.6503	8.0958	7.6403	7.411	7.4878	7.7294	7.5827	7.317	7.7775	7.5556	7.1792	7.6006	7.4122
LPC(8:1e)	LPC(8:1e)+H	GP	LPC	lysophosphatidylcholine	(8:1e)	368.22	144.728	C16 H35 O6 N1 P1	pos	0.0269159	6.2387	6.6802	6.7481	7.0411	7.1027	6.4415	6.0648	6.3399	7.3362	6.8648	6.4965	6.6324	6.2813	6.3702	7.2022	5.786	6.7873	6.3654
LPC(17:0)	LPC(17:0)+H	GP	LPC	lysophosphatidylcholine	(17:0)	510.355	202.538	C25 H53 O7 N1 P1	pos	0.0166432	6.1063	6.7363	6.4576	6.3851	6.5323	6.53	7.5302	6.3527	6.89	6.3832	6.184	6.5436	6.1073	6.4607	6.5067	6.2841	6.2853	6.2711
LPE(20:4e)	LPE(20:4e)+H	GP	LPE	lysophosphatidylethanolamine	(20:4e)	488.314	300.518	C25 H47 O6 N1 P1	pos	0.0127551	6.5885	6.9777	6.8454	6.9198	6.855	7.0467	8.2622	6.8926	6.9857	6.7443	6.7536	7.0641	6.688	7.0609	6.7841	6.5046	6.4827	6.6488
LPE(18:1p)	LPE(18:1p)+H	GP	LPE	lysophosphatidylethanolamine	(18:1p)	464.314	216.329	C23 H47 O6 N1 P1	pos	0.00903018	7.305	7.6715	7.4475	7.4689	7.5272	7.8829	7.9071	7.6323	7.8327	7.5074	7.4438	7.7438	7.4498	7.8485	7.3972	7.3122	6.9956	7.2917
MG(16:2e)	MG(16:2e)+H	GL	MG	monoglyceride	(16:2e)	313.274	1580.4	C19 H37 O3	pos	0.0451881	7.1414	7.4693	7.3057	7.7898	7.578	7.3362	7.3429	7.346	7.8505	7.2018	7.2664	7.3111	6.8696	7.5128	7.618	7.1398	7.4115	7.2297
MG(18:0)	MG(18:0)+H	GL	MG	monoglyceride	(18:0)	359.316	2.3598	C21 H43 O4	pos	0.0776456	6.7781	7.1613	6.845	6.8839	7.336	6.8426	6.7882	6.9279	7.4117	6.6987	6.7285	5.6664	6.2979	6.9105	6.2787	6.5262	6.6832	6.5256
MG(18:2e)	MG(18:2e)+H	GL	MG	monoglyceride	(18:2e)	341.305	831.281	C21 H41 O3	pos	0.0341417	7.2707	7.3856	7.2192	7.5053	7.4291	7.2401	7.4877	7.2709	7.4809	7.2566	7.1732	7.2386	6.8679	7.3252	7.3033	6.8197	7.1954	7.081
MG(18:3e)	MG(18:3e)+H	GL	MG	monoglyceride	(18:3e)	339.289	1591.24	C21 H39 O3	pos	0.0788709	6.9604	7.2293	6.9751	7.4443	7.2377	6.939	6.9834	6.5709	7.4454	6.9886	6.9151	7.0517	6.5115	7.1561	7.3904	6.8379	7.1697	6.9777
MG(16:0)	MG(16:0)+H	GL	MG	monoglyceride	(16:0)	331.284	2.3605	C19 H39 O4	pos	0.0463047	6.6676	7.1988	6.7109	7.3647	7.0279	6.7103	6.5958	6.8121	7.3683	6.6699	6.6752	6.7088	6.2197	6.8682	7.1199	6.5011	6.6682	6.5259
MGDG(47:12)	MGDG(47:12)+Na	SoG1	MGDG	Monogalactosyldiacylglycerol	(47:12)	939.596	473.256	C56 H84 O10 Na1	pos	0.0410894	7.5813	7.7638	7.62	7.968	7.7695	7.6329	7.5233	7.7436	7.9964	7.7749	7.6278	7.6848	7.3147	7.8816	8.2725	7.5138	7.5929	7.8894
MGDG(34:1e)	MGDG(34:1e)+NH4	SoG1	MGDG	Monogalactosyldiacylglycerol	(34:1e)	760.63	632.274	C43 H86 O9 N1	pos	0.0288987	8.1989	8.2829	8.1747	8.6598	8.4469	8.0448	7.8999	8.2419	8.4888	8.1062	8.1675	8.1784	7.7747	8.5079	8.4848	7.752	8.2391	8.2272
PA(18:1e)	PA(18:1e)+NH4	GP	PA	phosphatidic acid	(18:1e)	454.293	398.724	C21 H45 O7 N1 P1	pos	0.0419193	5.7945	6.363	5.9133	6.6617	6.6953	5.5286	6.5627	5.8115	6.67	6.3236	5.6129	6.3748	5.2894	5.527	6.7356	5.3835	6.4222	5.6338
PC(15:0/20:4)	PC(15:0/20:4)+H	GP	PC	phosphatidylcholine	(15:0/20:4)	768.554	604.36	C43 H79 O8 N1 P1	pos	0.028554	6.5965	7.4318	6.6276	6.7336	6.8296	6.7595	6.7895	6.7345	6.6582	6.7843	6.7482	6.8859	6.4268	6.6352	6.5904	6.0278	6.5551	6.8193
PC(16:0/13:0)	PC(16:0/13:0)+H	GP	PC	phosphatidylcholine	(16:0/13:0)	692.523	593.818	C37 H75 O8 N1 P1	pos	0.0323257	5.7848	6.2336	5.737	5.5735	5.9407	6.0143	6.8664	5.9835	5.789	6.0371	5.8834	5.9147	5.7491	5.8941	6.0227	5.5982	5.7695	5.8153
PC(17:1/20:1)	PC(17:1/20:1)+H	GP	PC	phosphatidylcholine	(17:1/20:1)	800.616	732.734	C45 H87 O8 N1 P1	pos	0.0120936	7.3897	7.7048	7.3582	7.5262	7.3507	7.5646	7.2993	7.5179	7.3682	7.4282	7.4258	7.4909	7.1193	7.4864	7.2613	7.1973	7.3781	7.7576
PC(16:1/19:0)	PC(16:1/19:0)+H	GP	PC	phosphatidylcholine	(16:1/19:0)	774.601	675.813	C43 H85 O8 N1 P1	pos	0.0203059	8.1146	8.5441	8.1784	8.0419	7.7222	8.1607	8.0626	8.2371	8.1238	7.9297	8.1501	8.1891	7.68	8.0465	8.0706	7.7516	8.1102	8.2222
PC(17:1/18:4)	PC(17:1/18:4)+Na	GP	PC	phosphatidylcholine	(17:1/18:4)	788.52	720.263	C43 H76 O8 N1 P1 Na1	pos	0.0353843	7.3265	7.4323	7.1774	8.0268	7.7608	7.2429	6.7454	7.4014	8.1096	7.2073	7.2921	7.1035	6.9187	7.5788	8.0777	7.4344	7.6211	7.3953
PC(18:3e/18:2)	PC(18:3e/18:2)+H	GP	PC	phosphatidylcholine	(18:3e/18:2)	766.574	719.033	C44 H81 O7 N1 P1	pos	0.0665209	8.0782	8.4607	8.0691	8.446	8.1463	8.1167	7.9322	8.2822	8.5434	8.045	8.1745	8.0443	7.8646	8.4434	8.4861	7.9861	8.3534	8.2345
PC(18:4)	PC(18:4)+H	GP	PC	phosphatidylcholine	(18:4)	530.288	187.776	C26 H45 O8 N1 P1	pos	0.0159997	6.3473	6.7237	6.5293	6.966	6.921	6.5674	6.3727	6.4014	6.8746	6.8594	6.4437	6.2989	6.1313	6.5068	6.9312	6.0482	6.6532	6.1715
PC(19:1/8:0)	PC(19:1/8:0)+H	GP	PC	phosphatidylcholine	(19:1/8:0)	662.476	279.581	C35 H69 O8 N1 P1	pos	0.0624388	6.4501	6.4933	6.6383	6.5859	6.9107	6.6912	6.7751	6.419	6.8875	6.1241	6.3136	6.1756	6.2073	6.7698	6.356	6.4131	6.4466	6.4572
PC(20:0/11:1)	PC(20:0/11:1)+H	GP	PC	phosphatidylcholine	(20:0/11:1)	718.538	602.644	C39 H77 O8 N1 P1	pos	0.0285489	6.2812	7.1449	6.4475	6.7432	6.4609	6.9484	6.8941	6.8051	6.7264	6.4983	6.5404	6.7123	6.3964	6.4854	6.6295	6.1623	6.3634	6.6873
PC(20:0/14:1)	PC(20:0/14:1)+H	GP	PC	phosphatidylcholine	(20:0/14:1)	760.585	767.562	C42 H83 O8 N1 P1	pos	0.0485874	7.4631	7.8113	7.5603	7.8452	7.7479	7.6789	7.6172	7.699	7.5972	7.6432	7.692	7.6404	7.3369	7.6191	7.5733	7.1968	7.8448	7.6456
PC(20:1e/12:1)	PC(20:1e/12:1)+H	GP	PC	phosphatidylcholine	(20:1e/12:1)	716.559	639.683	C40 H79 O7 N1 P1	pos	0.12746	7.5133	7.8438	7.624	7.7479	7.6842	7.8589	7.1085	7.7597	7.6469	7.3988	7.583	7.5595	7.2758	7.8018	7.6696	7.2959	7.7658	7.6433
PC(17:1/18:3)	PC(17:1/18:3)+Na	GP	PC	phosphatidylcholine	(17:1/18:3)	790.536	769.125	C43 H78 O8 N1 P1 Na1	pos	0.027368	7.0563	7.3023	7.0788	7.6274	7.2923	7.2742	6.9664	7.309	7.4017	7.1469	7.1468	7.1139	6.9056	7.3474	7.4434	6.8901	7.3704	7.1244
PC(10:0/11:2)	PC(10:0/11:2)+H	GP	PC	phosphatidylcholine	(10:0/11:2)	576.366	188.855	C29 H55 O8 N1 P1	pos	0.0138001	6.3924	6.869	6.6475	7.0981	7.1178	6.6035	6.439	6.2625	7.0317	6.8633	6.5459	6.5135	6.1896	6.5222	6.9491	6.2524	6.6543	6.4737
PC(10:0e/8:0)	PC(10:0e/8:0)+Na	GP	PC	phosphatidylcholine	(10:0e/8:0)	546.353	244.01	C26 H54 O7 N1 P1 Na1	pos	0.0157017	6.1392	6.609	6.408	6.6835	6.6007	6.5805	8.4982	6.3583	6.8859	6.5737	6.3286	6.6248	6.2495	6.5242	6.5426	6.2981	6.3105	6.3198
PC(12:1e/11:4)	PC(12:1e/11:4)+Na	GP	PC	phosphatidylcholine	(12:1e/11:4)	606.353	161.571	C31 H54 O7 N1 P1 Na1	pos	0.0256853	6.4883	6.4057	7.1938	6.3048	6.0604	6.6323	7.7042	7.4131	5.7739	6.2337	6.6478	7.1574	6.3959	7.2646	6.4809	6.7176	6.8438	6.2958
PC(18:2/22:6)	PC(18:2/22:6)+H	GP	PC	phosphatidylcholine	(18:2/22:6)	830.569	574.659	C48 H81 O8 N1 P1	pos	0.141324	6.5352	6.9845	6.6156	6.9727	6.9356	6.7122	6.4798	6.8828	6.619	6.7417	6.85	7.0664	6.4316	6.6588	6.4892	6.2064	6.6973	6.7483
PC(18:3e/18:1)	PC(18:3e/18:1)+H	GP	PC	phosphatidylcholine	(18:3e/18:1)	768.59	729.319	C44 H83 O7 N1 P1	pos	0.0458652	8.6361	8.8765	8.53	8.882	8.7646	8.8135	8.5181	8.8037	8.7904	8.6155	8.7331	8.6223	8.3246	8.966	8.9035	8.5172	8.8437	8.6714
PC(14:1e/20:4)	PC(14:1e/20:4)+H	GP	PC	phosphatidylcholine	(14:1e/20:4)	738.543	711.116	C42 H77 O7 N1 P1	pos	0.019649	8.1338	8.5867	8.3261	8.303	8.3924	8.3342	8.0717	8.2451	8.2501	8.1319	8.2054	8.1896	7.868	8.2365	8.165	7.8336	8.2242	8.3002
PC(32:3e)	PC(32:3e)+H	GP	PC	phosphatidylcholine	(32:3e)	714.543	613.802	C40 H77 O7 N1 P1	pos	0.0247118	7.3889	7.7852	7.4838	7.5864	7.6293	7.5337	7.4348	7.5339	7.4765	7.3463	7.3688	7.4784	7.1826	7.4871	7.4506	7.0671	7.3511	7.5343
PC(33:0)	PC(33:0)+H	GP	PC	phosphatidylcholine	(33:0)	748.585	717.391	C41 H83 O8 N1 P1	pos	0.0299327	7.4782	7.8934	7.3012	7.4006	7.6251	7.5284	7.9096	7.6405	7.43	7.6848	7.555	7.5549	7.2357	7.7229	7.482	7.0963	7.4594	7.6012
PC(33:0e)	PC(33:0e)+H	GP	PC	phosphatidylcholine	(33:0e)	734.606	755.888	C41 H85 O7 N1 P1	pos	0.0125344	7.4951	7.8535	7.2775	7.2799	7.5099	7.5966	7.6555	7.6841	7.4488	7.3897	7.6999	7.4082	7.2682	7.7872	7.4947	7.0201	7.542	7.4095
PC(33:1e)	PC(33:1e)+H	GP	PC	phosphatidylcholine	(33:1e)	732.59	701.235	C41 H83 O7 N1 P1	pos	0.0613269	7.6445	8.3519	7.9129	7.2861	8.2742	7.9902	8.0964	8.3797	7.7983	7.9389	7.5622	7.3725	7.6769	8.0273	7.9083	7.502	7.8594	7.3484
PC(16:2)	PC(16:2)+H	GP	PC	phosphatidylcholine	(16:2)	506.288	147.785	C24 H45 O8 N1 P1	pos	0.00365272	7.8256	8.1147	8.0866	8.5305	8.4406	8.057	7.8095	7.8716	8.2503	7.9237	7.8689	7.8138	7.4047	8.0535	8.3826	7.5703	8.1641	7.6994
PC(33:3e)	PC(33:3e)+H	GP	PC	phosphatidylcholine	(33:3e)	728.559	643.816	C41 H79 O7 N1 P1	pos	0.0302286	7.8426	8.1566	8.0093	7.9101	8.1041	8.0224	8.0052	7.8808	8.1578	7.7907	7.6938	7.7799	7.5482	8.0471	7.8852	7.5439	7.9691	7.9076
PC(34:1)	PC(34:1)+H	GP	PC	phosphatidylcholine	(34:1)	760.585	603.33	C42 H83 O8 N1 P1	pos	0.0368149	7.1843	7.504	7.3383	7.5733	7.4684	7.1994	7.3214	7.2977	7.446	7.1484	7.2764	7.3038	6.888	7.4628	7.3488	6.6876	7.2035	7.2751
PC(34:2)	PC(34:2)+H	GP	PC	phosphatidylcholine	(34:2)	758.569	588.987	C42 H81 O8 N1 P1	pos	0.0159779	7.4462	7.9697	7.6046	8.2314	7.6799	8.0069	7.9133	7.9405	7.8005	7.6256	7.8402	7.9589	7.4699	7.6103	7.7243	7.2412	7.6316	7.8944
PC(34:2e)	PC(34:2e)+H	GP	PC	phosphatidylcholine	(34:2e)	744.59	683.755	C42 H83 O7 N1 P1	pos	0.0233775	10.3426	10.4524	10.459	10.5635	10.5721	10.5466	10.3147	10.5493	10.5335	10.2622	10.4769	10.3944	10.0586	10.666	10.4738	10.1173	10.5852	10.4271
PC(34:3)	PC(34:3)+H	GP	PC	phosphatidylcholine	(34:3)	756.554	639.71	C42 H79 O8 N1 P1	pos	0.0758212	7.4239	7.9051	7.6714	7.765	7.8966	7.7742	7.5068	7.8041	7.5385	7.5102	7.6868	7.7126	7.2671	7.563	7.5332	7.1348	7.5726	7.6687
PC(34:3e)	PC(34:3e)+H	GP	PC	phosphatidylcholine	(34:3e)	742.574	1861.55	C42 H81 O7 N1 P1	pos	0.228326	6.1895	6.1765	5.3471	5.5869	5.9725	6.5846	5.8695	6.388	5.2843	5.3825	5.1972	5.6378	4.9794	5.9409	5.6865	5.2093	6.0042	6.0744
PC(34:4e)	PC(34:4e)+H	GP	PC	phosphatidylcholine	(34:4e)	740.559	609.678	C42 H79 O7 N1 P1	pos	0.0372064	6.595	7.8394	6.5053	7.3732	7.6056	7.5859	7.4307	7.3593	6.947	7.5099	6.591	7.381	7.1343	7.4295	7.3912	7.0461	6.5606	7.48
PC(34:5e)	PC(34:5e)+H	GP	PC	phosphatidylcholine	(34:5e)	738.543	599.541	C42 H77 O7 N1 P1	pos	0.0407412	6.7176	7.3625	6.8368	6.8935	7.1092	7.0013	7.0442	6.8692	6.9304	7.0997	6.8348	7.0142	6.6078	6.8328	6.7911	6.4039	6.7244	7.1046
PC(35:1e)	PC(35:1e)+H	GP	PC	phosphatidylcholine	(35:1e)	760.621	760.375	C43 H87 O7 N1 P1	pos	0.0323345	7.7941	8.2358	7.9613	7.8046	7.7455	8.0613	7.7594	7.9878	7.8773	7.593	7.943	7.793	7.6406	8.15	7.9024	7.5555	7.9891	7.6731
PC(35:2e)	PC(35:2e)+H	GP	PC	phosphatidylcholine	(35:2e)	758.606	708.759	C43 H85 O7 N1 P1	pos	0.0117167	8.8211	9.1433	9.1212	8.7649	8.9583	9.0934	8.7334	9.0181	8.7926	8.6356	8.918	8.8389	8.5755	9.1308	8.8538	8.5565	9.0372	8.8093
PC(35:3)	PC(35:3)+H	GP	PC	phosphatidylcholine	(35:3)	770.569	622.884	C43 H81 O8 N1 P1	pos	0.0256739	8.0683	8.6604	8.1552	8.3958	8.135	8.4084	8.0659	8.4139	8.0982	8.04	8.2041	8.3671	7.8674	8.0388	7.9529	7.5912	8.2005	8.2874
PC(35:3e)	PC(35:3e)+H	GP	PC	phosphatidylcholine	(35:3e)	756.59	703.28	C43 H83 O7 N1 P1	pos	0.0511661	8.672	9.1411	8.933	8.7213	8.9802	8.8885	8.7524	8.8339	8.7087	8.6114	8.7475	8.7629	8.4663	8.9761	8.6236	8.4219	8.9195	8.8427
PC(35:4e)	PC(35:4e)+H	GP	PC	phosphatidylcholine	(35:4e)	754.574	642.578	C43 H81 O7 N1 P1	pos	0.0266291	7.7339	8.2963	8.0545	7.822	8.0703	8.0585	7.9948	7.8223	8.1281	8.0006	7.8282	7.8473	7.6356	8.0759	8.0268	7.5553	7.8887	7.9578
PC(36:0e)	PC(36:0e)+H	GP	PC	phosphatidylcholine	(36:0e)	776.653	855.643	C44 H91 O7 N1 P1	pos	0.0145071	6.5887	6.8435	6.335	6.4809	6.5817	6.465	6.9422	6.5723	6.4116	6.8406	6.7676	6.4935	6.2998	6.8689	6.6304	6.2054	6.4883	6.4748
PC(36:2)	PC(36:2)+H	GP	PC	phosphatidylcholine	(18:0/18:2)	786.601	1863.28	C44 H85 O8 N1 P1	pos	0.292807	6.2024	6.1903	5.1042	5.0445	5.8351	6.5527	4.885	6.2994	5.1865	5.2153	5.3665	5.6396	5.0714	5.8353	5.7402	5.0689	5.5858	5.6635
PC(36:2e)	PC(36:2e)+Na	GP	PC	phosphatidylcholine	(36:2e)	794.603	721.476	C44 H86 O7 N1 P1 Na1	pos	0.0101258	8.517	9.0371	8.738	8.7238	9.0738	8.8267	8.5581	8.6535	8.4561	9.0445	8.846	8.9935	8.5724	8.9026	8.5277	8.2449	8.7821	8.9413
PC(36:4)	PC(36:4)+H	GP	PC	phosphatidylcholine	(18:2/18:2)	782.569	621.447	C44 H81 O8 N1 P1	pos	0.021362	8.2069	8.6522	8.2295	8.637	8.4383	8.5927	8.247	8.5837	8.2164	8.4297	8.4321	8.6907	8.0049	8.257	8.2511	7.7972	8.3191	8.5449
PC(36:5)	PC(36:5)+H	GP	PC	phosphatidylcholine	(16:1/20:4)	780.554	556.283	C44 H79 O8 N1 P1	pos	0.0188148	7.045	7.8279	7.0753	7.8221	7.6442	7.3376	7.363	7.4568	7.1215	7.1984	7.3269	7.5923	6.7779	7.1953	7.1302	6.6018	7.3043	7.2896
PC(36:5e)	PC(36:5e)+H	GP	PC	phosphatidylcholine	(36:5e)	766.574	662.705	C44 H81 O7 N1 P1	pos	0.0175186	9.2828	9.8739	9.5082	9.6106	9.7808	9.5034	9.4307	9.4312	9.3368	9.6845	9.4908	9.5702	9.247	9.5667	9.3717	9.013	9.459	9.6322
PC(37:1)	PC(37:1)+H	GP	PC	phosphatidylcholine	(37:1)	802.632	780.289	C45 H89 O8 N1 P1	pos	0.0185428	6.8482	7.268	6.8019	6.9207	6.9072	7.058	6.7915	6.8789	6.9023	7.0318	6.9561	6.9746	6.7321	6.9266	6.7881	6.6369	6.8593	6.8318
PC(37:2e)	PC(37:2e)+H	GP	PC	phosphatidylcholine	(37:2e)	786.637	769.272	C45 H89 O7 N1 P1	pos	0.0279165	7.1267	7.4744	7.2973	7.1172	6.8481	7.3098	7.1184	7.1825	7.1597	6.8826	7.2562	7.1553	6.9208	7.2969	7.1032	6.8543	7.2984	7.0701
PC(37:3e)	PC(37:3e)+H	GP	PC	phosphatidylcholine	(37:3e)	784.621	727.436	C45 H87 O7 N1 P1	pos	0.0154514	7.49	7.8997	7.6692	7.8084	7.534	7.6666	7.4978	7.5768	7.7266	7.4555	7.6059	7.6163	7.2789	7.6949	7.8867	7.2344	7.6106	7.492
PC(37:4)	PC(37:4)+H	GP	PC	phosphatidylcholine	(37:4)	796.585	751.395	C45 H83 O8 N1 P1	pos	0.0308316	7.5824	7.8608	7.4338	7.8835	7.6179	7.6796	7.4701	7.6095	7.5306	7.8133	7.6514	7.6477	7.4286	7.7042	7.4949	7.3495	7.5858	7.7094
PC(37:5e)	PC(37:5e)+H	GP	PC	phosphatidylcholine	(37:5e)	780.59	691.603	C45 H83 O7 N1 P1	pos	0.0192347	7.9034	8.5019	8.0621	7.8438	8.3099	8.0667	8.0404	7.8359	7.9184	8.1148	7.9292	8.1718	7.7004	8.1962	7.9538	7.6381	8.0893	8.1731
PC(38:1/8:0)	PC(38:1/8:0)+H	GP	PC	phosphatidylcholine	(38:1/8:0)	928.773	267.299	C54 H107 O8 N1 P1	pos	0.042618	6.625	6.7786	6.8706	6.9971	6.5224	6.7132	6.7071	6.7274	6.7887	6.823	6.9794	6.8438	6.6743	6.7711	6.9002	6.5019	6.6945	6.918
PC(38:2e)	PC(38:2e)+H	GP	PC	phosphatidylcholine	(38:2e)	800.653	800.164	C46 H91 O7 N1 P1	pos	0.0517506	7.707	7.9422	7.5617	7.8747	7.7629	7.8043	7.3393	7.7412	7.5937	7.7831	7.8766	7.7606	7.5106	7.9123	7.7306	7.437	7.6997	7.6487
PC(38:4)	PC(38:4)+H	GP	PC	phosphatidylcholine	(38:4)	810.601	705.535	C46 H85 O8 N1 P1	pos	0.0592372	7.9387	8.1755	7.8675	8.3275	8.2764	8.0562	7.934	8.1181	8.1798	7.8533	8.1446	8.0722	7.5765	8.1651	8.2014	7.8861	8.0544	8.0806
PC(38:4e)	PC(38:4e)+H	GP	PC	phosphatidylcholine	(38:4e)	796.621	713.023	C46 H87 O7 N1 P1	pos	0.00896719	9.0241	9.3137	9.0613	9.2613	9.3536	9.2212	8.8422	9.0524	8.9251	9.1514	9.1235	9.0744	8.8094	9.3249	9.0513	8.8034	9.2238	9.114
PC(38:5)	PC(38:5)+H	GP	PC	phosphatidylcholine	(38:5)	808.585	623.32	C46 H83 O8 N1 P1	pos	0.0205138	7.6245	8.07	7.6492	8.0436	7.9249	7.8631	7.6001	7.9162	7.5386	7.888	7.8504	8.2178	7.4667	7.6608	7.5032	7.2425	7.7735	7.9088
PC(38:5e)	PC(38:5e)+H	GP	PC	phosphatidylcholine	(38:5e)	794.606	675.377	C46 H85 O7 N1 P1	pos	0.0177639	9.283	9.8458	9.3655	9.4352	9.5777	9.5951	9.4643	9.426	9.466	9.5004	9.5194	9.4895	9.0963	9.5893	9.4179	9.0376	9.4484	9.5341
PC(38:6)	PC(38:6)+H	GP	PC	phosphatidylcholine	(38:6)	806.569	652.831	C46 H81 O8 N1 P1	pos	0.0227686	8.4726	8.7542	8.3412	8.8313	8.7463	8.6649	8.5175	8.6727	8.8624	8.5633	8.5353	8.6346	8.2188	8.6742	8.9352	8.2915	8.6361	8.6175
PC(38:6e)	PC(38:6e)+H	GP	PC	phosphatidylcholine	(38:6e)	792.59	699.856	C46 H83 O7 N1 P1	pos	0.0446649	7.8839	8.2321	7.8529	8.3264	8.2932	7.9407	7.8673	7.9389	8.3386	7.8969	7.981	7.9224	7.551	8.2086	8.3963	7.8636	8.1786	7.9955
PC(14:1e/20:2)	PC(14:1e/20:2)+H	GP	PC	phosphatidylcholine	(14:1e/20:2)	742.574	782.427	C42 H81 O7 N1 P1	pos	0.00387154	7.1687	7.4546	7.2282	7.3912	7.3852	7.6359	7.3004	7.3153	7.3205	7.1557	7.2611	7.8531	6.9248	7.4179	7.2181	7.5527	7.3074	7.2552
PC(14:1e/20:3)	PC(14:1e/20:3)+H	GP	PC	phosphatidylcholine	(14:1e/20:3)	740.559	639.681	C42 H79 O7 N1 P1	pos	0.0352112	8.4451	8.6627	8.7893	8.6428	8.8542	8.5212	8.4408	8.4672	8.44	8.3931	8.3355	8.4902	8.173	8.5678	8.4118	8.0038	8.3899	8.7396
PC(40:1)	PC(40:1)+H	GP	PC	phosphatidylcholine	(40:1)	844.679	878.265	C48 H95 O8 N1 P1	pos	0.0437358	6.1916	6.6071	6.1821	5.8739	6.3062	6.1954	6.2146	6.0714	5.8977	6.9895	6.5585	6.3665	6.2765	6.4184	6.0536	5.6935	6.1073	6.2355
PC(40:3e)	PC(40:3e)+H	GP	PC	phosphatidylcholine	(40:3e)	826.668	811.079	C48 H93 O7 N1 P1	pos	0.165093	6.7081	6.983	6.6465	6.6797	6.8403	7.0406	6.3814	6.6649	6.4691	7.4475	6.9332	7.0339	6.7088	6.9912	6.762	6.7846	6.5922	6.9338
PC(40:4)	PC(40:4)+H	GP	PC	phosphatidylcholine	(40:4)	838.632	734.692	C48 H89 O8 N1 P1	pos	0.0110219	7.637	7.8932	7.5637	7.6786	7.7268	7.6414	7.5793	7.6336	7.4737	8.0081	7.6998	7.7288	7.4932	7.7936	7.5099	7.4178	7.5586	7.7715
PC(40:4e)	PC(40:4e)+H	GP	PC	phosphatidylcholine	(40:4e)	824.653	772.68	C48 H91 O7 N1 P1	pos	0.0153525	7.7815	8.0502	7.9773	7.8019	7.9319	7.9122	7.8077	7.8435	7.7008	7.9478	7.9912	7.8767	7.6052	8.0638	7.7802	7.5317	7.8686	7.8034
PC(40:5)	PC(40:5)+H	GP	PC	phosphatidylcholine	(40:5)	836.616	695.74	C48 H87 O8 N1 P1	pos	0.0176388	7.6176	8.0798	7.6206	7.8463	7.8496	7.6606	7.6441	7.7506	7.4793	7.8614	7.7664	7.8149	7.4284	7.8064	7.5773	7.336	7.6086	7.7758
PC(40:6e)	PC(40:6e)+H	GP	PC	phosphatidylcholine	(40:6e)	820.621	677.152	C48 H87 O7 N1 P1	pos	0.0332283	8.2879	8.7847	8.4117	8.4205	8.5357	8.6259	8.423	8.4221	8.4522	8.4446	8.507	8.4777	8.1	8.5564	8.4354	8.0686	8.415	8.4552
PC(40:8e)	PC(40:8e)+H	GP	PC	phosphatidylcholine	(40:8e)	816.59	649.768	C48 H83 O7 N1 P1	pos	0.0127468	6.9415	7.5618	7.246	7.3828	7.6763	7.4504	6.9703	7.3264	7.4448	7.4786	7.4527	7.4618	7.0255	7.1716	7.0179	6.8205	7.4151	7.4195
PC(42:11)	PC(42:11)+H	GP	PC	phosphatidylcholine	(42:11)	852.554	571.105	C50 H79 O8 N1 P1	pos	0.0246779	6.3377	6.7222	6.5924	6.7643	6.6623	6.6268	6.6129	6.7319	6.5771	6.3763	6.5787	6.5712	6.0197	6.4919	6.2662	5.9997	6.5679	6.4874
PC(8:1e/10:2)	PC(8:1e/10:2)+H	GP	PC	phosphatidylcholine	(8:1e/10:2)	518.324	116.166	C26 H49 O7 N1 P1	pos	0.011725	6.1456	6.9649	6.6707	6.7265	7.3174	6.8537	6.988	6.646	6.9414	7.184	6.5755	6.9159	6.351	6.7381	6.7868	6.3081	6.9702	6.6712
PC(8:1e/11:3)	PC(8:1e/11:3)+H	GP	PC	phosphatidylcholine	(8:1e/11:3)	530.324	171.785	C27 H49 O7 N1 P1	pos	0.00574868	6.2821	6.8556	6.662	6.9388	7.5175	6.5245	6.8745	6.2915	6.9508	7.6694	6.4797	6.5381	6.0416	6.4297	6.6422	6.3863	7.2396	6.6838
PC(8:1e/12:3)	PC(8:1e/12:3)+H	GP	PC	phosphatidylcholine	(8:1e/12:3)	544.34	129.254	C28 H51 O7 N1 P1	pos	0.00955687	6.8854	7.6669	7.2345	7.4821	8.3382	7.1816	7.5246	7.0087	7.6066	8.3511	7.1729	7.4088	6.874	7.2296	7.3826	6.8659	7.8516	7.4355
PC(8:1e/24:0)	PC(8:1e/24:0)+H	GP	PC	phosphatidylcholine	(8:1e/24:0)	718.574	718.278	C40 H81 O7 N1 P1	pos	0.0409975	8.4255	8.7393	8.5247	8.5864	8.687	8.6058	8.431	8.6158	8.4441	8.5847	8.5806	8.4736	8.2721	8.7222	8.4062	8.1614	8.5604	8.6026
PC(22:2/11:1)	PC(22:2/11:1)+H	GP	PC	phosphatidylcholine	(22:2/11:1)	742.538	578.689	C41 H77 O8 N1 P1	pos	0.0139691	6.2516	7.1776	6.3801	6.5876	6.4561	6.6361	6.6392	6.825	6.6024	6.4256	6.4238	6.8298	6.0457	6.4048	6.6733	6.1016	6.3872	6.5279
PC(22:4/14:1)	PC(22:4/14:1)+H	GP	PC	phosphatidylcholine	(22:4/14:1)	780.554	643.927	C44 H79 O8 N1 P1	pos	0.012337	8.7671	9.0763	8.6324	9.3115	9.15	9.1363	8.9188	8.7945	9.7141	8.811	8.7188	8.7004	8.6354	9.2208	9.5615	8.7205	8.994	8.831
PC(23:0)	PC(23:0)+H	GP	PC	phosphatidylcholine	(23:0)	608.429	227.22	C31 H63 O8 N1 P1	pos	0.0303205	5.7137	6.2287	6.3753	6.4435	6.4859	6.116	6.457	5.6838	6.6378	5.8457	5.8482	5.8015	5.3699	6.2252	6.3651	5.9298	6.0483	5.7893
PC(23:0/11:1)	PC(23:0/11:1)+H	GP	PC	phosphatidylcholine	(23:0/11:1)	760.585	752.047	C42 H83 O8 N1 P1	pos	0.0348838	7.97	8.444	8.0205	7.9388	8.1953	7.7293	8.4621	7.782	8.0096	8.3706	8.3199	7.6023	8.034	8.3266	7.5743	7.2301	8.2404	8.1172
PC(23:0/11:2)	PC(23:0/11:2)+H	GP	PC	phosphatidylcholine	(23:0/11:2)	758.569	816.966	C42 H81 O8 N1 P1	pos	0.217242	7.1686	7.3929	7.3593	7.5414	7.3831	7.4376	7.2031	7.4687	7.1988	7.2786	7.4064	7.6054	6.944	7.3021	7.292	6.9464	7.2983	7.3474
PC(25:1)	PC(25:1)+H	GP	PC	phosphatidylcholine	(25:1)	634.444	251.585	C33 H65 O8 N1 P1	pos	0.0974927	6.3034	6.2978	6.7292	6.6829	6.7439	6.4504	6.4324	6.2954	6.8576	6.0709	6.3217	6.0133	6.0306	6.5063	6.479	6.2752	6.3684	6.4392
PC(25:1/11:2)	PC(25:1/11:2)+H	GP	PC	phosphatidylcholine	(25:1/11:2)	784.585	746.884	C44 H83 O8 N1 P1	pos	0.0100295	7.5121	7.6813	7.2137	7.7433	7.7656	7.6964	8.0106	7.6876	7.5679	7.7455	7.6049	7.7127	7.285	7.7773	7.5331	7.2028	7.5798	7.7166
PC(28:0)	PC(28:0)+H	GP	PC	phosphatidylcholine	(28:0)	678.507	558.543	C36 H73 O8 N1 P1	pos	0.0320812	6.2152	6.201	6.0345	6.3087	6.1187	6.3608	6.4752	6.2224	6.2044	6.339	6.0874	6.3771	6.1605	6.0743	5.9611	6.0107	5.9579	6.1422
PC(28:1)	PC(28:1)+H	GP	PC	phosphatidylcholine	(28:1)	676.491	327.798	C36 H71 O8 N1 P1	pos	0.0110069	5.915	6.2294	6.3446	6.5579	6.6614	6.3012	6.2451	6.1146	6.5989	5.9765	6.0581	5.9111	5.5819	6.3002	6.5843	5.704	6.306	5.9332
PC(20:3e/18:2)	PC(20:3e/18:2)+H	GP	PC	phosphatidylcholine	(20:3e/18:2)	794.606	744.686	C46 H85 O7 N1 P1	pos	0.00668399	8.3904	8.5792	8.3535	8.6893	8.6951	8.5742	8.3463	8.5891	8.603	8.2781	8.531	8.4487	8.0204	8.7856	8.6263	8.3019	8.6659	8.4805
PC(21:0)	PC(21:0)+H	GP	PC	phosphatidylcholine	(21:0)	580.397	207.437	C29 H59 O8 N1 P1	pos	0.110358	6.1331	6.7958	6.7107	6.685	6.9694	6.5621	6.8666	6.1998	7.0305	6.1344	6.1013	6.2572	5.9739	6.3323	6.7665	6.1038	6.0241	6.0662
PC(22:1/12:1)	PC(22:1/12:1)+H	GP	PC	phosphatidylcholine	(22:1/12:1)	758.569	751.862	C42 H81 O8 N1 P1	pos	0.0459649	7.7676	8.0349	7.7174	8.1083	7.8945	7.8665	7.7294	7.9286	7.8365	7.7107	7.8973	7.7678	7.8648	7.8124	7.6863	7.8196	8.2692	7.831
PC(22:2/10:1)	PC(22:2/10:1)+H	GP	PC	phosphatidylcholine	(22:2/10:1)	728.523	543.219	C40 H75 O8 N1 P1	pos	0.0171646	6.0384	6.4939	6.1312	6.5519	6.3144	6.5733	6.4062	6.3962	6.2436	6.2095	6.2202	6.5463	6.0092	6.0824	6.2304	5.8019	6.2072	6.3551
PC(31:0e)	PC(31:0e)+H	GP	PC	phosphatidylcholine	(31:0e)	706.574	696.801	C39 H81 O7 N1 P1	pos	0.0561959	7.6212	8.072	7.528	7.4947	7.7219	7.7733	7.8564	7.793	7.7278	7.5463	7.6855	7.436	7.2788	7.9717	7.7679	7.3024	7.6384	7.5583
PC(32:0e)	PC(32:0e)+H	GP	PC	phosphatidylcholine	(32:0e)	720.59	753.534	C40 H83 O7 N1 P1	pos	0.0468054	7.5423	7.718	7.865	7.669	7.5688	7.579	8.0035	7.6284	7.6371	7.4518	7.7263	7.3979	7.2489	7.8302	7.5481	7.1473	7.5169	8.1794
PC(32:1)	PC(32:1)+H	GP	PC	phosphatidylcholine	(32:1)	732.554	634.491	C40 H79 O8 N1 P1	pos	0.0192676	8.9468	9.463	9.0337	9.4172	8.9775	9.3922	9.1682	9.3485	9.1619	9.1084	9.1465	9.268	8.9803	9.1582	9.1375	8.7071	8.9934	9.1988
PC(32:2)	PC(32:2)+H	GP	PC	phosphatidylcholine	(32:2)	730.538	621.98	C40 H77 O8 N1 P1	pos	0.0388504	6.2144	6.5013	6.0303	7.5588	6.4148	6.6893	6.4779	6.4563	6.2402	6.3043	7.2641	7.3754	5.9674	6.1342	6.0219	5.7416	6.044	6.4477
PC(33:3)	PC(33:3)+H	GP	PC	phosphatidylcholine	(33:3)	742.538	668.049	C41 H77 O8 N1 P1	pos	0.0251453	8.0932	8.4617	8.1431	8.7076	8.3514	8.454	8.2106	8.4131	8.1558	8.389	8.3799	8.4498	8.0183	8.2573	8.2033	7.9078	8.2952	8.3115
PC(30:0e)	PC(30:0e)+H	GP	PC	phosphatidylcholine	(14:0e/16:0)	692.559	666.471	C38 H79 O7 N1 P1	pos	0.0327362	7.9632	8.1354	7.8918	7.995	8.0831	8.1796	8.1935	8.1759	8.0208	7.9313	8.1056	7.9721	7.8108	8.1803	8.0377	7.6865	7.983	6.3568
PC(30:1)	PC(30:1)+H	GP	PC	phosphatidylcholine	(30:1)	704.523	567.79	C38 H75 O8 N1 P1	pos	0.0651987	6.374	6.6853	6.3113	6.865	6.5073	6.9193	6.7385	6.6987	6.6213	6.472	6.4047	6.7627	6.4996	6.4112	6.4469	6.2139	6.3658	6.5947
PC(30:1e)	PC(30:1e)+H	GP	PC	phosphatidylcholine	(30:1e)	690.543	657.254	C38 H77 O7 N1 P1	pos	0.0221704	7.2728	7.6184	7.4247	7.3041	7.4634	7.4887	7.4104	7.5346	7.3289	7.4484	7.3897	7.3843	7.1724	7.4491	7.2569	7.1336	7.3462	7.423
PC(31:0)	PC(31:0)+H	GP	PC	phosphatidylcholine	(31:0)	720.554	658.6	C39 H79 O8 N1 P1	pos	0.0315979	7.6679	8.1834	7.4804	7.4101	7.8242	7.8006	8.0728	7.8854	7.6962	7.7966	7.7619	7.7037	7.3818	7.8786	7.7809	7.3134	7.6442	7.7887
PC(38:7e)	PC(38:7e)+H	GP	PC	phosphatidylcholine	(38:7e)	790.574	621.961	C46 H81 O7 N1 P1	pos	0.0220884	8.008	8.6874	8.1645	8.2983	8.6112	8.3507	8.184	8.1674	8.0881	8.4944	8.2497	8.3819	8.0348	8.3672	7.9283	7.7257	8.1751	8.4438
PC(39:5e)	PC(39:5e)+H	GP	PC	phosphatidylcholine	(39:5e)	808.621	732.795	C47 H87 O7 N1 P1	pos	0.0763929	7.1969	7.7415	7.3807	7.619	7.1949	7.3174	7.1244	7.1714	7.1311	7.4608	7.1018	7.1739	6.9801	7.4418	6.9825	6.9499	7.4516	7.3895
PE(14:0p/20:4)	PE(14:0p/20:4)+H	GP	PE	phosphatidylethanolamine	(14:0p/20:4)	696.496	620.101	C39 H71 O7 N1 P1	pos	0.0304782	6.5763	6.9178	6.5866	6.7003	6.7145	6.822	6.5279	6.7532	6.5038	6.7174	6.682	6.7563	6.3843	6.6261	6.5073	6.204	6.4779	6.7474
PE(14:1e/21:0)	PE(14:1e/21:0)+Na	GP	PE	phosphatidylethanolamine	(14:1e/21:0)	740.557	717.634	C40 H80 O7 N1 P1 Na1	pos	0.0284582	7.5289	7.9451	7.5888	7.8697	7.7979	7.6342	7.4658	7.6698	7.7581	7.5137	7.7722	7.5286	7.2187	7.8458	7.6687	7.4898	7.8115	7.6512
PE(10:0e/10:2)	PE(10:0e/10:2)+Na	GP	PE	phosphatidylethanolamine	(10:0e/10:2)	528.306	140.615	C25 H48 O7 N1 P1 Na1	pos	0.00425791	6.0791	6.7834	6.5157	6.9498	7.4478	6.4709	6.8763	6.3011	6.8094	7.427	6.3296	6.5102	5.8608	6.3802	6.5223	6.0978	7.1501	6.5317
PE(12:0e/6:0)	PE(12:0e/6:0)+Na	GP	PE	phosphatidylethanolamine	(12:0e/6:0)	504.306	259.646	C23 H48 O7 N1 P1 Na1	pos	0.0195685	6.392	6.8857	6.8294	7.0071	6.9932	7.0371	8.2949	6.6745	6.9967	6.8894	6.6465	6.9165	6.5949	6.8282	6.6647	6.5497	6.5372	6.5055
PE(14:1e/23:0)	PE(14:1e/23:0)+Na	GP	PE	phosphatidylethanolamine	(14:1e/23:0)	768.588	672.999	C42 H84 O7 N1 P1 Na1	pos	0.025864	9.6969	10.2079	10.0081	9.9097	10.0783	9.8956	9.8156	9.7291	9.8772	9.8485	9.853	9.7459	9.4557	10.0286	9.974	9.6155	9.8387	9.8019
PE(14:0e/22:4)	PE(14:0e/22:4)+Na	GP	PE	phosphatidylethanolamine	(14:0e/22:4)	748.525	715.174	C41 H76 O7 N1 P1 Na1	pos	0.0373101	7.6812	7.7026	7.3897	7.8556	7.6402	7.7601	7.381	7.4507	7.5091	7.1365	7.4876	7.3735	6.9449	7.4909	7.6111	7.1898	7.5879	7.4159
PE(18:0p/22:4)	PE(18:0p/22:4)+H	GP	PE	phosphatidylethanolamine	(18:0p/22:4)	780.59	783.312	C45 H83 O7 N1 P1	pos	0.0101357	8.3728	8.6411	8.3082	8.5427	8.5285	8.4762	8.3061	8.4706	8.2785	8.5935	8.5546	8.4436	8.1804	8.5692	8.2752	8.1193	8.4095	8.4996
PE(18:0p/22:5)	PE(18:0p/22:5)+H	GP	PE	phosphatidylethanolamine	(18:0p/22:5)	778.574	739.865	C45 H81 O7 N1 P1	pos	0.0312191	8.2863	8.679	8.3932	8.6091	8.5381	8.5181	8.4339	8.5448	8.3858	8.4312	8.5248	8.4898	8.1177	8.6953	8.3033	8.053	8.4062	8.48
PE(18:1e)	PE(18:1e)+H	GP	PE	phosphatidylethanolamine	(8:1e/10:0)	480.308	176.642	C23 H47 O7 N1 P1	pos	0.0300065	6.2379	6.9078	6.5915	7.0011	7.3436	6.4846	7.1921	6.4289	7.146	7.6807	6.7019	6.544	6.2739	6.5543	6.7645	6.4151	7.2586	6.4473
PE(14:1e/23:1)	PE(14:1e/23:1)+Na	GP	PE	phosphatidylethanolamine	(14:1e/23:1)	766.572	752.455	C42 H82 O7 N1 P1 Na1	pos	0.00619894	7.5778	7.8993	7.5117	7.7231	7.5621	7.6783	7.3703	7.6385	7.5936	7.5221	7.541	7.4966	7.2768	7.7263	7.5851	7.3475	7.5971	7.5901
PE(18:1p/22:3)	PE(18:1p/22:3)+H	GP	PE	phosphatidylethanolamine	(18:1p/22:3)	780.59	714.261	C45 H83 O7 N1 P1	pos	0.0308824	7.8138	8.1278	7.9216	7.825	8.0036	7.9599	7.679	7.9486	7.8876	7.4952	7.8436	7.7694	7.3951	8.1456	7.9525	7.6612	8.0521	7.781
PE(18:1p/22:5)	PE(18:1p/22:5)+H	GP	PE	phosphatidylethanolamine	(18:1p/22:5)	776.559	721.652	C45 H79 O7 N1 P1	pos	0.0282975	7.7155	7.7086	7.8675	8.254	8.1177	8.0472	7.1965	8.1651	7.7803	7.8621	8.2294	8.0104	7.5385	7.7378	7.6884	7.4614	8.1308	7.9686
PE(18:1p/22:6)	PE(18:1p/22:6)+H	GP	PE	phosphatidylethanolamine	(18:1p/22:6)	774.543	668.152	C45 H77 O7 N1 P1	pos	0.0259601	7.4221	7.722	7.4865	7.9679	7.7522	7.8611	7.4806	7.8957	7.5137	7.5254	7.9014	7.6291	7.2809	7.3915	7.3296	7.1654	7.7216	7.6426
PE(18:2e)	PE(18:2e)+H	GP	PE	phosphatidylethanolamine	(18:2e)	478.293	694.833	C23 H45 O7 N1 P1	pos	0.0783265	7.1294	7.4576	7.1716	7.4738	7.161	7.2224	7.11	7.3705	7.1843	6.9338	7.2523	7.1584	6.5209	7.358	7.2045	6.8417	7.1657	7.1766
PE(18:2p/18:2)	PE(18:2p/18:2)+H	GP	PE	phosphatidylethanolamine	(18:2p/18:2)	724.528	651.264	C41 H75 O7 N1 P1	pos	0.0133827	8.0051	8.1407	8.1054	8.2805	7.3201	8.2667	8.0995	8.139	8.1496	7.3168	8.0009	7.9892	7.6778	8.2344	8.0339	7.7803	8.0053	7.2719
PE(18:2p/20:4)	PE(18:2p/20:4)+H	GP	PE	phosphatidylethanolamine	(18:2p/20:4)	748.528	639.425	C43 H75 O7 N1 P1	pos	0.0157203	8.4371	8.5885	8.5313	8.7451	8.6089	8.6121	8.4353	8.4969	8.4348	8.5378	8.548	8.4412	8.2115	8.6308	8.375	8.1772	8.3854	8.5844
PE(12:0p/22:0)	PE(12:0p/22:0)+H	GP	PE	phosphatidylethanolamine	(12:0p/22:0)	704.559	748.078	C39 H79 O7 N1 P1	pos	0.114628	7.6753	8.0003	7.6605	8.0322	7.5994	7.8414	7.7391	7.9629	7.9621	7.7462	7.9234	7.7223	7.4421	8.0031	7.8295	7.4623	7.7778	7.75
PE(12:0p/24:0)	PE(12:0p/24:0)+H	GP	PE	phosphatidylethanolamine	(12:0p/24:0)	732.59	812.46	C41 H83 O7 N1 P1	pos	0.0120302	7.4816	7.9117	7.6429	7.6929	7.4012	7.5725	7.4507	7.8323	7.6154	7.6675	7.6968	7.5884	7.2934	7.7568	7.7787	6.9804	7.6216	7.4795
PE(20:3e)	PE(20:3e)+H	GP	PE	phosphatidylethanolamine	(20:3e)	504.308	155.523	C25 H47 O7 N1 P1	pos	0.00817028	6.04	6.7269	6.4255	6.9226	7.3566	6.3192	6.9277	6.1554	6.7026	7.2858	6.276	6.4901	5.9225	6.2896	6.422	6.0886	7.048	6.3821
PE(20:4e/18:1)	PE(20:4e/18:1)+Na	GP	PE	phosphatidylethanolamine	(20:4e/18:1)	774.541	716.879	C43 H78 O7 N1 P1 Na1	pos	0.0450912	7.5425	7.8205	7.6375	8.2737	7.9826	7.864	7.3805	7.0453	8.4337	7.5629	7.302	7.981	7.2499	7.9366	8.0856	7.4501	7.6486	7.7264
PE(21:2)	PE(21:2)+Na	GP	PE	phosphatidylethanolamine	(21:2)	556.301	147.481	C26 H48 O8 N1 P1 Na1	pos	0.0072005	6.8676	7.3235	7.079	7.6371	7.5584	7.1534	6.8602	6.8791	7.3591	7.1883	7.0207	6.9624	6.5203	6.9857	7.4367	6.5934	7.1554	6.8311
PE(21:3)	PE(21:3)+H	GP	PE	phosphatidylethanolamine	(21:3)	532.303	164.123	C26 H47 O8 N1 P1	pos	0.0107161	6.8708	7.352	7.0988	7.5758	7.5033	7.0557	6.7411	6.8505	7.2992	7.1471	6.9799	6.9872	6.5348	6.9362	7.359	6.6537	7.1428	6.8245
PE(24:2/14:3)	PE(24:2/14:3)+H	GP	PE	phosphatidylethanolamine	(24:2/14:3)	766.538	721.652	C43 H77 O8 N1 P1	pos	0.0125605	8.2858	8.4828	8.2815	8.8431	8.6512	8.484	8.028	8.4459	8.6527	8.2615	8.3296	8.307	7.9321	8.4971	8.5949	8.2096	8.5291	8.3793
PE(35:3e)	PE(35:3e)+H	GP	PE	phosphatidylethanolamine	(18:3e/17:0)	714.543	722.378	C40 H77 O7 N1 P1	pos	0.0137852	8.1592	8.4213	8.3503	8.2952	8.1901	8.3636	8.0715	8.3485	8.1895	7.8819	8.1268	8.1255	7.7955	8.3833	8.084	7.909	8.2936	8.1058
PE(16:0e)	PE(16:0e)+H	GP	PE	phosphatidylethanolamine	(16:0e)	454.293	178.404	C21 H45 O7 N1 P1	pos	0.0126754	5.9298	6.4484	6.6767	6.6349	6.7812	6.4189	8.3111	6.3586	6.688	6.6827	6.2933	6.5164	6.1122	6.4624	6.4373	6.066	6.2963	6.1453
PE(16:0e/22:2)	PE(16:0e/22:2)+Na	GP	PE	phosphatidylethanolamine	(16:0e/22:2)	780.588	749.823	C43 H84 O7 N1 P1 Na1	pos	0.00625868	7.4763	7.9858	7.462	7.8599	7.6362	7.5975	7.6369	7.6936	8.0337	7.6011	7.6507	7.6316	7.2534	7.6706	7.555	7.2773	7.5561	7.6204
PE(16:0e/22:4)	PE(16:0e/22:4)+Na	GP	PE	phosphatidylethanolamine	(16:0e/22:4)	776.557	687.193	C43 H80 O7 N1 P1 Na1	pos	0.0277019	7.9608	8.2345	7.8564	8.2856	8.1975	8.1756	7.9427	8.136	8.0792	8.0392	8.0603	7.9677	7.7013	8.0447	7.96	7.7441	7.9507	8.068
PE(16:0p/18:1)	PE(16:0p/18:1)+H	GP	PE	phosphatidylethanolamine	(16:0p/18:1)	702.543	694.088	C39 H77 O7 N1 P1	pos	0.0116418	8.1244	8.4208	8.2055	8.4554	8.2982	8.2538	8.0942	8.353	8.0535	7.9207	7.7885	8.1179	7.7566	8.3702	8.1748	7.8727	8.185	8.1182
PE(16:0p/18:2)	PE(16:0p/18:2)+H	GP	PE	phosphatidylethanolamine	(16:0p/18:2)	700.528	693.997	C39 H75 O7 N1 P1	pos	0.00744627	9.1079	9.3925	9.1873	9.442	9.2756	9.2259	9.0008	9.3469	9.0577	8.9484	9.0887	9.0992	8.7654	9.3467	9.1694	8.8554	9.179	9.0873
PE(19:1)	PE(19:1)+H	GP	PE	phosphatidylethanolamine	(19:1)	508.303	187.806	C24 H47 O8 N1 P1	pos	0.0110766	6.9722	7.35	7.1726	7.6046	7.515	7.1784	7.0816	6.9934	7.5293	7.5043	7.1026	6.9443	6.7539	7.1734	7.5582	6.7199	7.2749	6.8567
PE(20:0p/22:4)	PE(20:0p/22:4)+H	GP	PE	phosphatidylethanolamine	(20:0p/22:4)	808.621	834.329	C47 H87 O7 N1 P1	pos	0.0122697	6.4745	6.7354	6.4951	6.4222	6.2851	6.1832	5.986	6.495	6.3878	7.3912	6.3655	6.3678	6.4662	6.5419	6.4329	6.1605	6.1414	6.4041
PE(16:0p/20:4)	PE(16:0p/20:4)+H	GP	PE	phosphatidylethanolamine	(16:0p/20:4)	724.528	681.593	C41 H75 O7 N1 P1	pos	0.0195676	9.1103	9.3198	9.217	9.4614	9.377	9.3321	9.1469	9.3562	9.317	9.2129	9.282	9.247	8.8618	9.195	9.1352	8.832	9.1788	9.2949
PE(16:0p/20:5)	PE(16:0p/20:5)+H	GP	PE	phosphatidylethanolamine	(16:0p/20:5)	722.512	639.871	C41 H73 O7 N1 P1	pos	0.0225438	8.178	8.5584	8.3847	8.7769	8.2857	8.4622	8.1767	8.4762	8.2806	8.2604	8.3608	8.3725	8.0934	8.3266	8.2704	7.9231	8.1943	8.2676
PE(16:0p/22:4)	PE(16:0p/22:4)+H	GP	PE	phosphatidylethanolamine	(16:0p/22:4)	752.559	720.533	C43 H79 O7 N1 P1	pos	0.00882726	8.6838	8.8938	8.6796	8.928	8.7495	8.8075	8.4864	8.7851	8.7066	8.7774	8.7574	8.685	8.4042	8.7908	8.6457	8.41	8.6791	8.7857
PE(16:0p/22:5)	PE(16:0p/22:5)+H	GP	PE	phosphatidylethanolamine	(16:0p/22:5)	750.543	663.909	C43 H77 O7 N1 P1	pos	0.0213336	7.0403	7.3107	7.0531	7.4586	7.2804	7.2689	7.0247	7.3852	7.1882	7.0687	7.2266	7.2045	6.751	7.1028	6.8908	6.7217	7.1443	7.0627
PE(16:1p/20:0)	PE(16:1p/20:0)+Na	GP	PE	phosphatidylethanolamine	(16:1p/20:0)	752.557	693.827	C41 H80 O7 N1 P1 Na1	pos	0.0130676	8.1093	8.7069	8.2728	8.4324	8.2765	8.1532	8.3652	8.2809	8.276	8.2294	8.248	8.1686	7.8523	8.3809	8.2866	7.9051	8.1566	8.2407
PE(16:1p/22:3)	PE(16:1p/22:3)+H	GP	PE	phosphatidylethanolamine	(16:1p/22:3)	752.559	684.675	C43 H79 O7 N1 P1	pos	0.0303033	7.9993	8.247	8.0526	8.3616	8.3288	8.3017	8.0351	8.2793	8.2132	8.1742	8.2034	8.1725	7.7496	8.1054	8.0341	7.7782	8.0644	8.2858
PE(17:0/11:4)	PE(17:0/11:4)+Na	GP	PE	phosphatidylethanolamine	(17:0/11:4)	650.379	158.403	C33 H58 O8 N1 P1 Na1	pos	0.016303	6.2989	6.2566	7.0731	6.2256	5.8546	6.4827	7.568	7.2707	5.4355	6.0325	6.415	7.0678	6.2291	7.1303	6.3426	6.5343	6.6465	6.131
PE(18:0p/16:0)	PE(18:0p/16:0)+H	GP	PE	phosphatidylethanolamine	(18:0p/16:0)	704.559	799.781	C39 H79 O7 N1 P1	pos	0.00555782	6.9126	7.0952	6.8634	7.1602	7.0846	7.1255	7.1351	7.0905	6.8309	7.6154	7.2269	6.9807	6.8784	7.2045	6.9431	6.5588	7.0401	6.9465
PE(18:0p/18:1)	PE(18:0p/18:1)+H	GP	PE	phosphatidylethanolamine	(18:0p/18:1)	730.574	803.159	C41 H81 O7 N1 P1	pos	0.00389581	8.2252	8.5418	8.2882	8.5623	8.4028	8.42	8.1703	8.4939	8.2217	8.5681	8.4831	8.3499	8.209	8.4946	8.2943	7.9489	8.4342	8.2612
PE(18:0p/20:3)	PE(18:0p/20:3)+H	GP	PE	phosphatidylethanolamine	(18:0p/20:3)	754.574	766.822	C43 H81 O7 N1 P1	pos	0.0129285	8.299	8.5917	8.4327	8.6846	8.4183	8.4102	8.2842	8.505	8.181	8.4017	8.4722	8.4756	8.1754	8.437	8.2575	8.037	8.4123	8.3561
PE(16:0p/20:2)	PE(16:0p/20:2)+H	GP	PE	phosphatidylethanolamine	(16:0p/20:2)	728.559	698.394	C41 H79 O7 N1 P1	pos	0.0272029	8.1827	8.2809	8.3042	8.3123	8.0837	8.2187	8.0643	8.1842	7.9534	7.8778	8.0421	8.0599	7.711	8.2556	8.022	7.7451	8.0446	8.0808
PE(16:0p/20:3)	PE(16:0p/20:3)+H	GP	PE	phosphatidylethanolamine	(16:0p/20:3)	726.543	708.185	C41 H77 O7 N1 P1	pos	0.147447	7.794	8.5288	7.9848	9.2251	8.3932	8.3267	8.184	8.2688	8.256	8.0325	8.5997	8.2802	7.5314	7.911	8.2064	7.9978	8.4298	7.9897
PE(18:0p/22:3)	PE(18:0p/22:3)+H	GP	PE	phosphatidylethanolamine	(18:0p/22:3)	782.606	832.282	C45 H85 O7 N1 P1	pos	0.0163536	6.9766	7.1724	6.9896	7.161	7.2199	6.9809	6.8594	7.0216	6.8612	7.3184	7.0956	6.9511	6.7579	7.1516	6.9867	6.6175	6.8429	6.908
PE(42:8e)	PE(42:8e)+Na	GP	PE	phosphatidylethanolamine	(42:8e)	824.557	783.207	C47 H80 O7 N1 P1 Na1	pos	0.0199309	7.476	7.6133	7.338	7.6776	7.5998	7.561	7.2319	7.6016	7.5118	7.5371	7.4945	7.4731	7.1112	7.6994	7.5381	7.3113	7.56	7.5564
PE(52:2)	PE(52:2)+Na	GP	PE	phosphatidylethanolamine	(52:2)	990.786	1037.52	C57 H110 O8 N1 P1 Na1	pos	0.053204	5.572	6.2914	5.9681	6.3217	6.3459	5.6151	6.46	6.0215	6.0188	6.0887	5.9839	6.1063	6.0564	6.102	5.7515	6.1914	5.9995	5.9831
PE(8:1e/10:0)	PE(8:1e/10:0)+Na	GP	PE	phosphatidylethanolamine	(8:1e/10:0)	502.29	681.626	C23 H46 O7 N1 P1 Na1	pos	0.0417177	6.9656	7.2304	7.1463	7.384	7.301	7.2011	6.9198	7.0635	7.2068	7.3261	7.0463	6.9023	6.6339	7.1721	6.9594	6.6277	7.0361	7.0612
PE(8:1e/12:2)	PE(8:1e/12:2)+Na	GP	PE	phosphatidylethanolamine	(8:1e/12:2)	526.29	258.237	C25 H46 O7 N1 P1 Na1	pos	0.0248905	5.9682	6.4814	6.4476	6.6297	6.5776	6.6797	7.8663	6.3745	6.6054	6.5131	6.2896	6.5625	6.156	6.5387	6.3457	6.2102	6.1978	6.2344
PE(18:1p/18:1)	PE(18:1p/18:1)+H	GP	PE	phosphatidylethanolamine	(18:1p/18:1)	728.559	752.862	C41 H79 O7 N1 P1	pos	0.0217716	9.1179	9.4021	9.1081	9.5362	9.2222	9.3186	9.0688	9.4542	9.0692	9.166	9.2605	9.2265	8.9705	9.4198	9.127	8.9122	9.3123	9.1949
PE(8:1e/12:4)	PE(8:1e/12:4)+Na	GP	PE	phosphatidylethanolamine	(8:1e/12:4)	522.259	140.32	C25 H42 O7 N1 P1 Na1	pos	0.0224744	6.0966	6.5014	6.4268	6.8232	7.181	6.4326	6.4841	6.2973	6.5691	6.9211	6.2301	6.2953	5.769	6.4104	6.4886	6.624	7.0477	6.7441
PE(40:9e)	PE(40:9e)+Na	GP	PE	phosphatidylethanolamine	(40:9e)	794.51	612.259	C45 H74 O7 N1 P1 Na1	pos	0.0513958	6.6473	7.3248	6.9194	7.0056	6.9736	7.0857	6.7689	7.0226	6.7212	6.9863	6.9847	7.1754	6.609	6.7388	6.4227	6.3045	6.8236	7.049
PE(37:1e)	PE(37:1e)+H	GP	PE	phosphatidylethanolamine	(37:1e)	746.606	780.344	C42 H85 O7 N1 P1	pos	0.0105475	7.4104	7.8045	7.3455	7.6859	7.6705	7.6193	7.5621	7.6033	7.5728	7.5786	7.6942	7.4948	7.2532	7.7434	7.5308	7.1898	7.6575	7.4883
PE(39:2e)	PE(39:2e)+Na	GP	PE	phosphatidylethanolamine	(39:2e)	794.603	782.234	C44 H86 O7 N1 P1 Na1	pos	0.013519	7.1594	7.635	7.2026	7.3858	7.4758	7.4438	7.1938	7.4143	7.186	7.4598	7.4965	7.4345	7.22	7.5889	7.2616	6.9615	7.4456	7.3545
PE(41:4e)	PE(41:4e)+Na	GP	PE	phosphatidylethanolamine	(41:4e)	818.603	731.738	C46 H86 O7 N1 P1 Na1	pos	0.0353593	7.7935	8.1283	7.0154	8.0202	8.1598	7.9773	7.7002	7.9346	7.9153	8.0126	7.997	7.9959	7.509	8.121	8.0009	7.6567	8.0354	7.9821
PE(8:1e/12:3)	PE(8:1e/12:3)+H	GP	PE	phosphatidylethanolamine	(8:1e/12:3)	502.293	135.351	C25 H45 O7 N1 P1	pos	0.013571	7.007	7.696	7.4293	7.804	8.4289	7.4416	7.6661	7.2157	7.7549	8.3729	7.3188	7.4284	6.9143	7.3015	7.5021	7.0343	8.0525	7.5108
PE(18:0p/20:4)	PE(18:0p/20:4)+H	GP	PE	phosphatidylethanolamine	(18:0p/20:4)	752.559	763.398	C43 H79 O7 N1 P1	pos	0.0323338	7.4719	8.4563	8.0948	8.4161	8.2404	8.1365	7.9952	8.2537	8.1728	8.2514	8.4101	8.2404	7.8113	7.7961	8.0817	7.2442	8.174	8.3685
PE(18:0p/22:2)	PE(18:0p/22:2)+H	GP	PE	phosphatidylethanolamine	(18:0p/22:2)	784.621	878.524	C45 H87 O7 N1 P1	pos	0.0141719	6.6731	6.8958	6.6723	6.6361	6.4165	6.5895	6.4052	6.6666	6.2209	7.061	6.7702	6.579	6.415	6.8149	6.6358	6.2846	6.5564	6.5689
PG(27:0)	PG(27:0)+NH4	GP	PG	phosphatidylglycerol	(27:0)	670.465	526.697	C33 H69 O10 N1 P1	pos	0.0186336	7.1994	7.4217	7.1468	7.5867	7.408	7.2214	7.1718	7.2866	7.5652	7.2086	7.1768	7.0691	6.8228	7.4261	7.6656	7.1029	7.1854	7.3387
PG(29:2e)	PG(29:2e)+H	GP	PG	phosphatidylglycerol	(29:2e)	663.46	713.438	C35 H68 O9 N0 P1	pos	0.0308693	9.5625	9.749	9.5495	9.9072	9.9544	9.6439	9.5867	9.6608	9.8568	9.7345	9.5959	9.5847	9.2808	9.8207	10.2046	9.5332	9.6687	9.8037
PG(32:2e)	PG(32:2e)+NH4	GP	PG	phosphatidylglycerol	(32:2e)	722.533	1296.01	C38 H77 O9 N1 P1	pos	0.292226	5.6297	6.7563	6.2936	6.9204	6.8748	6.7822	6.2815	6.3849	7.0767	5.7805	6.2809	6.1137	5.2505	6.6869	7.0382	5.8796	6.4883	5.7737
PG(19:0/8:0)	PG(19:0/8:0)+NH4	GP	PG	phosphatidylglycerol	(19:0/8:0)	670.465	563.725	C33 H69 O10 N1 P1	pos	0.0351765	7.3967	7.6292	7.3201	7.823	7.6277	7.4145	7.4018	7.4946	7.7861	7.4074	7.3902	7.296	6.9144	7.7003	7.7222	7.3497	7.3692	7.4833
PG(46:0)	PG(46:0)+H	GP	PG	phosphatidylglycerol	(46:0)	919.736	961.64	C52 H104 O10 N0 P1	pos	0.145725	6.6835	5.6847	6.3148	6.1098	5.913	6.2385	7.8718	6.31	6.0784	6.6466	6.4918	6.5009	6.81	6.2972	6.2651	6.8612	6.2437	6.373
PG(29:5)	PG(29:5)+NH4	GP	PG	phosphatidylglycerol	(29:5)	688.418	194.512	C35 H63 O10 N1 P1	pos	0.0199254	5.7455	6.7762	6.1879	6.9725	6.9235	6.3278	6.0588	5.9739	6.8566	6.4161	5.9742	6.4521	5.4643	5.9615	6.6848	5.7441	6.4049	5.8677
PG(20:0/8:0)	PG(20:0/8:0)+NH4	GP	PG	phosphatidylglycerol	(20:0/8:0)	684.481	487.51	C34 H71 O10 N1 P1	pos	0.00240688	6.6642	6.8477	6.6529	7.0428	6.9456	6.6415	6.544	6.7197	7.0758	6.8199	6.6109	6.591	6.377	6.9532	7.1257	6.4938	6.6016	6.8273
phSM(t39:7)	phSM(t39:7)+H	SP	phSM	sphingomyelin(phytosphingosine)	(t39:7)	793.549	627.778	C44 H78 O8 N2 P1	pos	0.0123058	6.8669	6.8184	6.8469	7.5353	7.3443	6.8906	6.8499	6.9085	6.5461	6.8788	6.7547	6.8402	6.591	7.0956	7.5317	6.9259	7.0543	6.908
phSM(t37:2)	phSM(t37:2)+H	SP	phSM	sphingomyelin(phytosphingosine)	(t37:2)	775.596	661.454	C42 H84 O8 N2 P1	pos	0.0134986	8.6668	8.7814	8.5496	9.0688	8.8946	8.5943	8.572	8.7138	9.0702	8.4685	8.572	8.5959	8.1991	8.9776	9.1603	8.404	8.7903	8.6635
PI(14:1e/22:1)	PI(14:1e/22:1)+Na	GP	PI	phosphatidylinositol	(14:1e/22:1)	871.567	599.709	C45 H85 O12 N0 P1 Na1	pos	0.01215	6.1681	6.9588	6.5283	6.5793	6.6098	6.4578	6.4251	6.3223	6.5066	6.3551	6.5177	6.1293	5.7914	6.3018	6.0599	6.0328	6.4665	6.2404
PIP(17:1/18:0)	PIP(17:1/18:0)+H	GP	PIP	phosphatidylinositol	(17:1/18:0)	931.531	622.215	C44 H85 O16 N0 P2	pos	0.0292234	7.5556	7.5186	7.2745	8.1919	7.9574	7.4388	7.1937	7.3076	8.2584	7.2912	7.2701	7.1895	7.1119	7.642	8.1259	7.5121	7.7766	7.3084
PIP3(22:4e)	PIP3(22:4e)+NH4	GP	PIP3	phosphatidylinositol	(22:4e)	906.26	903.764	C31 H60 O21 N1 P4	pos	0.023596	7.3909	8.0028	6.8414	7.9746	7.8365	7.2121	7.2919	7.4001	7.5079	7.4668	7.7532	7.4457	6.7096	7.6899	8.0861	7.4786	7.5277	7.1694
PS(39:3e)	PS(39:3e)+Na	GP	PS	phosphatidylserine	(39:3e)	836.578	729.825	C45 H84 O9 N1 P1 Na1	pos	0.023621	7.5267	7.6632	7.2946	7.8988	7.6619	7.5985	7.1841	7.6746	7.9291	7.3475	7.5492	7.4894	7.1123	7.8612	8.0705	7.5147	7.7752	7.504
PS(16:2e/23:0)	PS(16:2e/23:0)+Na	GP	PS	phosphatidylserine	(16:2e/23:0)	838.593	788.832	C45 H86 O9 N1 P1 Na1	pos	0.0133879	6.4583	6.6601	6.1142	6.4281	6.7137	6.5845	6.6549	6.6532	6.4579	6.5228	6.8141	6.5892	6.2959	6.8752	6.5435	6.0436	6.6524	6.5084
PS(31:7e)	PS(31:7e)+H	GP	PS	phosphatidylserine	(31:7e)	694.408	155.073	C37 H61 O9 N1 P1	pos	0.0130688	5.9726	6.0277	6.8533	5.7774	5.2928	6.2671	7.3122	7.0499	5.5846	5.8347	6.1646	6.8086	5.9483	6.9077	6.074	6.1967	6.4329	5.8838
SM(d19:0/21:4)	SM(d19:0/21:4)+H	SP	SM	sphingomyelin	(d19:0/21:4)	781.622	750.528	C45 H86 O6 N2 P1	pos	0.0687893	7.5101	7.7533	7.3194	7.8999	7.789	7.5918	7.9085	7.6531	7.6812	7.821	7.7354	7.4857	7.2531	7.7633	7.7104	7.4297	7.7221	7.6367
SM(d20:0/23:4)	SM(d20:0/23:4)+H	SP	SM	sphingomyelin	(d20:0/23:4)	823.669	849.248	C48 H92 O6 N2 P1	pos	0.00963745	7.031	7.4798	7.2345	7.2739	7.3715	7.328	7.3786	7.3834	7.088	7.4243	7.4232	7.176	7.0128	7.4244	7.0962	6.8482	7.2671	7.2401
SM(d34:0)	SM(d34:0)+H	SP	SM	sphingomyelin	(d34:0)	705.591	651.177	C39 H82 O6 N2 P1	pos	0.0563355	7.7543	8.2476	7.8383	8.0424	8.1751	7.9581	8.369	7.8902	7.3063	7.9826	7.94	7.8631	7.7212	7.9622	7.9736	7.7024	7.868	8.0126
SM(d18:1/24:3)	SM(d18:1/24:3)+H	SP	SM	sphingomyelin	(d18:1/24:3)	809.653	814.848	C47 H90 O6 N2 P1	pos	0.00893975	7.7926	8.2041	7.9727	8.0009	8.0575	8.0713	8.1404	8.1048	7.7453	8.5319	8.1963	8.0355	7.9134	8.132	7.8072	7.596	7.9975	7.985
SM(d20:1/24:3)	SM(d20:1/24:3)+H	SP	SM	sphingomyelin	(d20:1/24:3)	837.684	884.676	C49 H94 O6 N2 P1	pos	0.0100924	7.7744	8.1305	7.8677	7.9463	8.0601	7.9584	7.9926	8.0208	7.7471	8.3591	8.1231	7.8916	7.7754	8.089	7.7879	7.5132	7.9302	7.9121
SM(d33:1)	SM(d33:1)+H	SP	SM	sphingomyelin	(d33:1)	689.559	591.779	C38 H78 O6 N2 P1	pos	0.0271151	6.9054	7.5097	7.1679	7.1657	7.1904	7.2352	7.3307	7.1236	7.2854	7.2006	7.0525	7.1209	6.8526	7.1438	7.0178	6.7569	7.0755	7.0721
SM(d18:2/24:1)	SM(d18:2/24:1)+H	SP	SM	sphingomyelin	(d18:2/24:1)	811.669	840.825	C47 H92 O6 N2 P1	pos	0.0218081	5.7247	6.6018	6.1783	6.4099	6.299	6.1822	6.6489	6.275	6.125	7.297	6.5127	6.104	6.4071	6.2757	6.0721	5.7627	6.2261	6.0891
SM(d38:5)	SM(d38:5)+H	SP	SM	sphingomyelin	(d38:5)	751.575	635.796	C43 H80 O6 N2 P1	pos	0.0159335	7.6922	7.9841	7.7016	8.1591	7.8322	7.7419	7.5726	7.9679	7.9585	7.7824	7.7951	7.7786	7.4045	7.9828	7.8486	7.5325	7.8337	7.8262
SM(d42:0)	SM(d42:0)+H	SP	SM	sphingomyelin	(d42:0)	817.716	911.782	C47 H98 O6 N2 P1	pos	0.000956828	6.7767	7.1822	6.9188	6.8321	7.2675	6.8861	7.0265	6.9359	6.7899	7.7007	7.1462	6.8295	6.8786	7.0043	6.8892	6.4891	6.9983	6.8919
SM(d43:5)	SM(d43:5)+H	SP	SM	sphingomyelin	(d43:5)	821.653	780.41	C48 H90 O6 N2 P1	pos	0.0290851	6.453	6.8411	6.3982	6.3647	6.3729	6.595	6.3145	6.5062	6.4687	6.8413	6.5959	6.5629	6.4059	6.453	6.2438	6.2863	6.4108	6.2894
SM(d44:3)	SM(d44:3)+H	SP	SM	sphingomyelin	(d44:3)	839.7	816.4	C49 H96 O6 N2 P1	pos	0.0302895	6.4807	6.9631	6.6037	6.5478	6.6873	6.6581	6.9374	6.6751	6.4205	7.3497	6.7264	6.6755	6.5392	6.69	6.4941	6.2625	6.5858	6.5402
SM(d44:4)	SM(d44:4)+H	SP	SM	sphingomyelin	(d44:4)	837.684	835.823	C49 H94 O6 N2 P1	pos	0.0315478	5.9467	6.609	6.2051	6.4524	6.0568	6.6726	6.3408	6.3227	6.3061	7.1989	6.4255	6.2481	6.3796	6.2728	6.0366	6.149	6.1526	6.215
SM(d34:1)	SM(d34:1)+H	SP	SM	sphingomyelin	(d34:1)	703.575	626.086	C39 H80 O6 N2 P1	pos	0.0200913	9.2476	9.7768	9.3579	9.515	9.5549	9.547	9.7936	9.5364	9.3038	9.4901	9.514	9.4603	9.1683	9.4677	9.0996	8.9361	9.3857	9.4694
SM(d35:1)	SM(d35:1)+H	SP	SM	sphingomyelin	(d35:1)	717.591	659.749	C40 H82 O6 N2 P1	pos	0.0201101	7.8704	8.4652	8.128	7.9479	8.041	8.1355	8.1053	8.2192	7.9847	7.9237	8.0348	8.0026	7.6954	8.0925	7.9779	7.5778	8.0453	8.0246
SM(d36:4)	SM(d36:4)+H	SP	SM	sphingomyelin	(d36:4)	725.559	628.075	C41 H78 O6 N2 P1	pos	0.0323831	8.1423	8.4539	8.1318	8.6233	8.4822	8.2349	8.4539	8.2519	8.5978	8.2829	8.2151	8.183	8.0002	8.4174	8.507	8.0627	8.324	8.2729
SM(d18:1/24:4)	SM(d18:1/24:4)+H	SP	SM	sphingomyelin	(d18:1/24:4)	807.638	758.056	C47 H88 O6 N2 P1	pos	0.0298695	6.7552	7.0358	6.7179	7.0956	6.8623	6.9723	6.6589	7.0495	6.7377	7.2726	7.1087	6.9622	6.7131	7.1104	6.7158	6.6408	6.9156	6.9193
SM(d18:2/22:1)	SM(d18:2/22:1)+H	SP	SM	sphingomyelin	(d18:2/22:1)	783.638	774.172	C45 H88 O6 N2 P1	pos	0.0585236	5.7607	6.8999	6.5005	6.6454	6.5185	6.5612	6.0751	6.2709	5.894	7.1869	6.7315	6.0947	6.4651	6.5905	6.02	5.7655	6.1997	6.5754
SM(d38:4)	SM(d38:4)+H	SP	SM	sphingomyelin	(d38:4)	753.591	690.186	C43 H82 O6 N2 P1	pos	0.031138	8.0744	8.284	7.9399	8.6338	8.494	8.0373	7.9469	8.1743	8.8299	7.944	8.1284	8.0226	7.6145	8.2977	8.8602	8.0617	8.3544	8.2023
SM(t18:0/16:1)	SM(t18:0/16:1)+H	SP	SM	sphingomyelin	(t18:0/16:1)	719.57	604.355	C39 H80 O7 N2 P1	pos	0.0179125	7.1105	7.5246	7.1786	7.368	7.2868	7.3462	7.4361	7.4173	7.3709	7.4828	7.29	7.3622	6.9449	7.3508	7.219	6.8199	7.161	7.2596
SM(t40:7)	SM(t40:7)+H	SP	SM	sphingomyelin	(t40:7)	791.57	671.639	C45 H80 O7 N2 P1	pos	0.0218174	8.1883	8.5851	8.0766	8.5491	8.6161	8.3113	8.1466	8.2189	8.6362	8.2918	8.2515	8.2083	7.8194	8.5163	8.7701	8.0886	8.317	8.2517
SM(d44:5)	SM(d44:5)+H	SP	SM	sphingomyelin	(d44:5)	835.669	810.345	C49 H92 O6 N2 P1	pos	0.0111645	7.8824	8.3691	7.9142	8.1055	8.064	8.1217	7.8905	8.1377	7.8056	8.6393	8.2193	8.1506	8.0195	8.0909	7.8939	7.5923	7.9915	8.0069
SM(d44:6)	SM(d44:6)+H	SP	SM	sphingomyelin	(d44:6)	833.653	756.302	C49 H90 O6 N2 P1	pos	0.0192012	7.4506	7.7933	7.2945	7.7311	7.5434	7.6566	7.6162	7.6405	7.4768	7.8098	7.611	7.5932	7.3037	7.6364	7.5028	7.3126	7.5631	7.5762
SM(d36:5)	SM(d36:5)+H	SP	SM	sphingomyelin	(d36:5)	723.544	565.274	C41 H76 O6 N2 P1	pos	0.0286	6.4215	6.819	6.5937	6.8906	6.7838	6.6397	6.6781	6.6368	6.8216	6.7724	6.587	6.6524	6.3447	6.7385	6.5455	6.3343	6.6059	6.632
SM(d38:0)	SM(d38:0)+H	SP	SM	sphingomyelin	(d38:0)	761.653	774.346	C43 H90 O6 N2 P1	pos	0.0209074	6.4518	7.1291	6.6935	6.9906	6.8908	6.6313	6.9813	6.7921	6.6852	7.6525	7.0668	6.7006	6.9657	6.7801	6.6516	6.4003	6.7674	6.6455
ST(m19:0/25:2)	ST(m19:0/25:2)+NH4	SP	ST	Sulfatide	(m19:0/25:2)	919.702	1193.26	C50 H99 O10 N2 S1	pos	0.0443909	6.9445	6.7596	6.8877	6.597	6.8541	6.7303	6.8489	6.7029	7.1285	7.0543	6.8214	6.9013	6.8723	6.7853	6.7352	6.928	6.7663	6.9837
ST(m19:1/14:0+O)	ST(m19:1/14:0+O)+H	SP	ST	Sulfatide	(m19:1/14:0+O)	766.513	753.312	C39 H76 O11 N1 S1	pos	0.0165834	7.1555	7.3082	7.0481	7.6076	7.223	7.2436	6.8156	7.3101	7.1812	6.9442	7.165	7.1412	6.7145	7.367	7.2541	6.9632	7.3323	7.202
StE(33:6)	StE(33:6)+NH4	ST	StE	Stigmasterol Ester	(33:6)	894.806	1108.55	C62 H104 O2 N1	pos	0.0232982	8.0215	7.1889	7.9033	7.2751	7.3572	7.5046	7.5803	7.4325	7.539	8.1786	7.9112	7.9037	8.1949	7.3376	7.3221	8.2295	7.8812	7.836
TG(10:0/17:1/18:1)	TG(10:0/17:1/18:1)+NH4	GL	TG	triglyceride	(10:0/17:1/18:1)	778.692	1097.06	C48 H92 O6 N1	pos	0.0286902	7.2147	6.5228	7.0396	6.3798	6.6797	6.7079	6.7674	6.6187	6.5128	6.9463	6.9323	6.9411	7.3079	6.6715	6.7825	7.1394	6.7277	6.9045
TG(10:0/18:1/20:5)	TG(10:0/18:1/20:5)+H	GL	TG	triglyceride	(10:0/18:1/20:5)	795.65	1086.01	C51 H87 O6	pos	0.022273	7.374	6.7421	7.0866	6.7562	6.9555	6.9085	6.8018	6.9045	6.8015	7.1622	7.0908	7.2091	7.3339	6.7596	6.7672	7.3239	6.8079	7.1053
TG(10:0/18:1/18:2)	TG(10:0/18:1/18:2)+NH4	GL	TG	triglyceride	(10:0/18:1/18:2)	790.692	1006.37	C49 H92 O6 N1	pos	0.0206529	6.8583	6.06	6.6298	6.0296	6.2644	6.3303	6.3527	6.3351	5.9368	6.3959	6.4097	6.7256	7.0659	6.3557	6.0602	6.9564	6.1903	6.6412
TG(10:0/18:1/20:4)	TG(10:0/18:1/20:4)+H	GL	TG	triglyceride	(10:0/18:1/20:4)	797.665	1135.34	C51 H89 O6	pos	0.0360702	8.8374	8.2712	8.5763	8.3833	8.4813	8.6059	8.2988	8.5306	8.4198	8.6694	8.5605	8.6714	8.6802	8.4637	8.284	8.7648	8.5334	8.6966
TG(12:0e/18:3/22:5)	TG(12:0e/18:3/22:5)+Na	GL	TG	triglyceride	(12:0e/18:3/22:5)	855.684	1245.26	C55 H92 O5 Na1	pos	0.0484729	7.0089	7.0737	7.0092	6.7846	6.9102	6.975	7.0033	6.9802	6.9255	6.8286	7.088	6.8049	6.868	6.9297	6.8627	6.971	7.0229	6.93
TG(12:0e/20:3/22:5)	TG(12:0e/20:3/22:5)+Na	GL	TG	triglyceride	(12:0e/20:3/22:5)	883.715	1308.24	C57 H96 O5 Na1	pos	0.0408319	7.7226	7.8318	7.7181	7.6778	7.7506	7.7321	7.7265	7.824	8.0315	7.657	7.9336	7.6241	7.4716	7.8102	7.9382	7.674	7.9145	7.7711
TG(12:0e/22:4/22:5)	TG(12:0e/22:4/22:5)+Na	GL	TG	triglyceride	(12:0e/22:4/22:5)	909.731	1308.94	C59 H98 O5 Na1	pos	0.0259138	7.5604	7.7479	7.4478	7.4922	7.7213	7.6202	7.6174	7.4638	7.7996	7.3449	7.5779	7.3829	7.2094	7.5602	7.6744	7.4151	7.6103	7.6935
TG(12:1e/22:3/22:3)	TG(12:1e/22:3/22:3)+Na	GL	TG	triglyceride	(12:1e/22:3/22:3)	913.762	1397.03	C59 H102 O5 Na1	pos	0.0112649	7.2811	7.3368	7.4211	7.1799	7.2573	7.145	7.2278	7.3435	7.7789	7.1708	7.3247	7.2996	6.8282	7.313	7.4755	7.6308	7.4103	7.2721
TG(12:1e/22:5/22:5)	TG(12:1e/22:5/22:5)+Na	GL	TG	triglyceride	(12:1e/22:5/22:5)	905.699	1192.75	C59 H94 O5 Na1	pos	0.0965634	6.3354	6.4331	6.706	5.9733	6.3564	6.5127	6.5416	6.7008	5.9121	6.3204	6.5059	6.6834	6.4998	6.7396	6.542	6.8169	6.5253	6.5683
TG(12:1e/22:5/23:1)	TG(12:1e/22:5/23:1)+Na	GL	TG	triglyceride	(12:1e/22:5/23:1)	927.778	1414.13	C60 H104 O5 Na1	pos	0.0129058	7.9297	7.9372	7.8632	8.0941	8.0553	7.6868	7.9205	7.9734	8.4744	7.8986	7.9461	7.9994	7.6488	7.986	8.1638	7.7518	7.7117	7.9161
TG(10:0/18:2/18:2)	TG(10:0/18:2/18:2)+NH4	GL	TG	triglyceride	(10:0/18:2/18:2)	788.676	1006.51	C49 H90 O6 N1	pos	0.0106932	7.5721	6.9695	7.4065	6.9751	7.0768	7.1113	7.1022	7.0719	6.889	7.4011	7.2212	7.4404	7.8073	7.0762	6.9535	7.6592	6.9788	7.4088
TG(11:0/18:1/18:1)	TG(11:0/18:1/18:1)+NH4	GL	TG	triglyceride	(11:0/18:1/18:1)	806.723	1170.41	C50 H96 O6 N1	pos	0.0119781	7.3355	6.7433	7.2517	6.7493	6.781	6.9278	7.202	6.8358	6.7556	7.0111	7.101	7.1128	7.5136	6.7789	6.7429	7.3192	6.8543	7.0764
TG(11:0/18:1/18:3)	TG(11:0/18:1/18:3)+H	GL	TG	triglyceride	(11:0/18:1/18:3)	785.665	1171.88	C50 H89 O6	pos	0.0315194	6.8604	6.3672	6.7933	6.4317	6.6823	6.7293	6.3523	6.5996	6.6362	6.5731	6.7298	6.6988	6.6702	6.6309	6.5596	6.8474	6.7127	6.6316
TG(11:0/18:1/20:4)	TG(11:0/18:1/20:4)+H	GL	TG	triglyceride	(11:0/18:1/20:4)	811.681	1170.55	C52 H91 O6	pos	0.0419765	7.027	6.5441	6.9111	6.4102	6.5842	6.8245	6.4152	6.6273	6.3858	6.7037	6.8452	6.8428	6.8141	6.6013	6.5902	6.9185	6.6509	6.8025
TG(12:0/23:1/24:0)	TG(12:0/23:1/24:0)+NH4	GL	TG	triglyceride	(12:0/23:1/24:0)	976.927	1444.09	C62 H122 O6 N1	pos	0.0125842	7.6293	7.3338	7.5427	7.4855	7.4893	7.373	7.5955	7.5684	7.9524	7.5867	7.7451	7.5511	7.4622	7.4129	7.4578	7.5047	7.5108	7.5491
TG(12:0e/11:0/11:0)	TG(12:0e/11:0/11:0)+Na	GL	TG	triglyceride	(12:0e/11:0/11:0)	619.527	882.642	C37 H72 O5 Na1	pos	0.0279691	8.6152	8.5841	8.3671	8.5612	8.4859	8.5897	8.1918	8.7425	8.595	8.5861	8.6557	8.4917	8.2543	8.843	8.9433	8.4929	8.6022	8.67
TG(12:0e/12:4/16:0)	TG(12:0e/12:4/16:0)+H	GL	TG	triglyceride	(12:0e/12:4/16:0)	673.577	961.57	C43 H77 O5	pos	0.0598912	6.3181	6.5705	6.0569	6.4262	6.1881	6.501	6.5049	6.2532	6.0257	6.3529	6.4879	6.5104	5.9711	6.3471	6.0456	6.0951	6.2407	6.257
TG(10:0/10:0/18:1)	TG(10:0/10:0/18:1)+NH4	GL	TG	triglyceride	(10:0/10:0/18:1)	682.598	902.293	C41 H80 O6 N1	pos	0.016239	6.7406	5.9367	6.456	6.1439	6.1585	6.2614	5.8706	6.4015	6.205	6.5296	6.3127	6.5355	6.8239	6.1272	5.7561	6.892	6.1443	6.5029
TG(16:0/16:0/17:0)	TG(16:0/16:0/17:0)+NH4	GL	TG	triglyceride	(16:0/16:0/17:0)	838.786	1357.36	C52 H104 O6 N1	pos	0.0154504	7.8898	7.7119	7.9519	7.6376	7.55	8.0025	8.3611	7.8512	8.0151	7.8466	8.0823	7.9193	8.0458	7.6175	7.7551	8.0992	8.2565	7.8894
TG(16:0/16:0/18:1)	TG(16:0/16:0/18:1)+Na	GL	TG	triglyceride	(16:0/16:0/18:1)	855.741	1334.76	C53 H100 O6 Na1	pos	0.150237	8.4534	8.7284	8.5528	8.9161	8.7295	8.7551	8.662	8.6339	9.2953	8.7114	8.4999	8.4928	7.8098	8.6601	8.8726	8.3489	8.7428	8.5456
TG(16:0/16:0/18:2)	TG(16:0/16:0/18:2)+NH4	GL	TG	triglyceride	(16:0/16:0/18:2)	848.77	1253.8	C53 H102 O6 N1	pos	0.113605	8.348	8.0318	8.5761	8.0054	7.6606	8.3183	8.2621	8.5865	8.0971	8.6625	8.5236	8.3694	8.3896	7.4779	7.3098	8.5078	8.3903	8.2699
TG(16:0/16:0/20:4)	TG(16:0/16:0/20:4)+NH4	GL	TG	triglyceride	(16:0/16:0/20:4)	872.77	1266.76	C55 H102 O6 N1	pos	0.00635902	8.2815	7.6934	8.1124	7.5054	7.7057	7.8951	8.1211	7.8783	7.8577	8.385	7.9753	8.1369	8.4879	7.7302	7.5674	8.3114	7.7552	8.2179
TG(16:0/16:1/16:1)	TG(16:0/16:1/16:1)+NH4	GL	TG	triglyceride	(16:0/16:1/16:1)	820.739	1135.54	C51 H98 O6 N1	pos	0.0385316	8.228	7.3902	8.1338	7.6614	7.6641	7.6981	7.8448	7.6669	7.5278	8.0277	7.9291	8.0024	8.4876	7.6268	7.382	8.1184	7.7227	7.9849
TG(16:0/16:1/17:1)	TG(16:0/16:1/17:1)+NH4	GL	TG	triglyceride	(16:0/16:1/17:1)	834.755	1273.08	C52 H100 O6 N1	pos	0.0423959	8.1616	8.5017	8.1894	8.6919	8.6089	8.2233	8.2056	8.2667	8.8037	8.1089	8.1797	8.1008	7.4523	8.7127	8.8518	7.6169	8.3092	8.2023
TG(16:0/16:1/18:1)	TG(16:0/16:1/18:1)+NH4	GL	TG	triglyceride	(16:0/16:1/18:1)	848.77	1278.98	C53 H102 O6 N1	pos	0.0343268	10.4454	9.9042	10.298	9.9929	9.9966	10.2442	10.2374	10.2895	9.8774	10.2492	10.3009	10.2867	10.3244	9.9466	9.9097	10.4146	10.1057	10.2935
TG(16:0/16:1/18:2)	TG(16:0/16:1/18:2)+NH4	GL	TG	triglyceride	(16:0/16:1/18:2)	846.755	1180.37	C53 H100 O6 N1	pos	0.00601799	7.6883	6.7971	7.3447	6.9444	6.9822	7.0421	7.2304	7.3123	6.8199	7.4121	7.2451	7.3137	7.7379	6.8732	6.6677	7.553	6.9384	7.3294
TG(16:0/17:0/18:1)	TG(16:0/17:0/18:1)+NH4	GL	TG	triglyceride	(16:0/17:0/18:1)	864.802	1277.46	C54 H106 O6 N1	pos	0.020028	8.0221	8.1953	8.1285	8.217	8.2225	8.2015	8.2027	8.247	8.577	8.0457	8.182	8.1001	7.711	8.1714	8.3141	8.0972	8.2554	8.1408
TG(16:0/17:1/18:1)	TG(16:0/17:1/18:1)+NH4	GL	TG	triglyceride	(16:0/17:1/18:1)	862.786	1308.12	C54 H104 O6 N1	pos	0.019747	9.2287	8.6743	9.1294	8.4864	8.5983	8.832	9.071	8.8102	8.7608	8.9618	9.1616	8.9574	9.2975	8.696	8.5925	9.17	8.8565	8.9926
TG(16:0/18:1/18:1)	TG(16:0/18:1/18:1)+NH4	GL	TG	triglyceride	(16:0/18:1/18:1)	876.802	1759.06	C55 H106 O6 N1	pos	0.0664992	7.6999	7.0002	7.1657	7.048	7.3508	7.1151	6.9235	6.8913	7.1193	7.2699	7.706	7.2623	7.4444	7.3611	6.9586	7.1571	7.1375	7.3482
TG(16:0/18:1/18:2)	TG(16:0/18:1/18:2)+NH4	GL	TG	triglyceride	(16:0/18:1/18:2)	874.786	1219.73	C55 H104 O6 N1	pos	0.0495629	9.01	8.4485	9.1756	8.4027	8.837	8.6124	8.8914	8.6195	8.717	9.1989	8.65	8.8969	9.4554	8.4985	8.3358	8.9957	8.4752	8.7877
TG(16:0/18:1/18:3)	TG(16:0/18:1/18:3)+NH4	GL	TG	triglyceride	(16:0/18:1/18:3)	872.77	1226.51	C55 H102 O6 N1	pos	0.0393997	9.5702	9.1412	9.8808	9.077	9.3126	9.4538	10.0104	9.6017	9.1318	9.5526	9.6163	9.6413	10.2073	9.2918	9.3967	10.1276	9.5488	9.692
TG(16:0/18:1/19:0)	TG(16:0/18:1/19:0)+NH4	GL	TG	triglyceride	(16:0/18:1/19:0)	892.833	1333.76	C56 H110 O6 N1	pos	0.283167	8.0018	8.5195	8.0215	8.7269	8.5493	8.4479	8.2115	8.449	9.1605	7.9271	8.3567	8.31	7.5702	8.4302	8.7873	7.9152	8.6466	8.3788
TG(16:0/18:1/20:5)	TG(16:0/18:1/20:5)+H	GL	TG	triglyceride	(16:0/18:1/20:5)	879.744	1286.47	C57 H99 O6	pos	0.0975472	9.2861	9.3789	9.0603	9.1906	9.2912	9.1889	9.2033	9.2196	9.3264	9.2092	9.2947	9.113	8.8694	9.346	9.419	9.1689	9.444	9.1186
TG(16:0/18:1/22:0)	TG(16:0/18:1/22:0)+NH4	GL	TG	triglyceride	(16:0/18:1/22:0)	934.88	1413.08	C59 H116 O6 N1	pos	0.0178306	8.699	8.1834	8.6358	8.3563	8.3665	8.3241	8.4946	8.3899	8.7466	8.6148	8.6982	8.6389	8.605	8.3028	8.3907	8.6233	8.387	8.5504
TG(16:0/18:1/22:5)	TG(16:0/18:1/22:5)+NH4	GL	TG	triglyceride	(16:0/18:1/22:5)	924.802	1193.18	C59 H106 O6 N1	pos	0.166459	7.7553	7.4973	7.6928	7.5487	7.8079	7.5136	7.6435	7.4193	8.0248	8.0452	7.5903	7.6842	7.6878	7.3364	7.7862	7.7884	7.7015	7.6758
TG(12:1e/6:0/18:1)	TG(12:1e/6:0/18:1)+H	GL	TG	triglyceride	(12:1e/6:0/18:1)	621.545	822.583	C39 H73 O5	pos	0.0203144	6.3168	6.1958	6.6415	6.5226	6.2015	6.51	7.3326	6.2833	6.2039	6.4446	6.3844	6.3537	6.3997	6.2968	6.1207	6.1909	6.2777	6.2073
TG(12:1e/6:0/18:3)	TG(12:1e/6:0/18:3)+H	GL	TG	triglyceride	(12:1e/6:0/18:3)	617.514	582.556	C39 H69 O5	pos	0.0671681	5.2108	5.5194	5.1032	4.7787	4.6113	4.3313	7.7115	4.6456	4.9032	4.4525	4.2489	4.3426	3.8409	4.4477	4.7451	4.1199	4.4053	4.2982
TG(12:1e/6:0/20:5)	TG(12:1e/6:0/20:5)+H	GL	TG	triglyceride	(12:1e/6:0/20:5)	641.514	782.964	C41 H69 O5	pos	0.0314729	7.0755	7.1353	6.89	7.1488	7.0469	7.1844	7.4851	7.167	6.9127	7.2519	7.2497	7.23	6.9209	7.1933	6.9029	6.8284	7.0841	7.0562
TG(15:0/16:0/16:0)	TG(15:0/16:0/16:0)+NH4	GL	TG	triglyceride	(15:0/16:0/16:0)	810.755	1307.57	C50 H100 O6 N1	pos	0.0584722	7.2272	7.1838	7.2506	7.0997	7.1019	7.199	7.8968	7.1721	7.4821	7.1631	7.3494	7.203	7.3471	7.0794	7.2425	7.3118	7.2815	7.1589
TG(15:0/16:0/18:1)	TG(15:0/16:0/18:1)+NH4	GL	TG	triglyceride	(15:0/16:0/18:1)	836.77	1308.04	C52 H102 O6 N1	pos	0.0186015	8.4329	7.962	8.3945	7.7949	7.8756	8.153	8.5072	8.1515	8.2586	8.2314	8.4627	8.2603	8.572	7.8897	7.9095	8.4626	8.2034	8.2336
TG(15:0/16:0/24:0)	TG(15:0/16:0/24:0)+NH4	GL	TG	triglyceride	(15:0/16:0/24:0)	922.88	1550.61	C58 H116 O6 N1	pos	0.0562467	8.4046	6.1558	8.5232	7.9255	6.0802	8.2932	8.3037	8.0991	6.5554	8.6387	8.3223	8.5218	8.2039	7.6876	6.663	8.3353	8.643	8.1442
TG(15:0/18:2/20:5)	TG(15:0/18:2/20:5)+H	GL	TG	triglyceride	(15:0/18:2/20:5)	863.712	1189.59	C56 H95 O6	pos	0.143904	7.2652	6.8969	7.1903	6.4112	6.7132	6.9154	7.5264	7.0654	6.509	6.9211	7.3143	7.0629	7.0746	6.9232	7.0218	7.554	7.1417	7.125
TG(15:0/22:6/24:1)	TG(15:0/22:6/24:1)+NH4	GL	TG	triglyceride	(15:0/22:6/24:1)	992.864	1264.07	C64 H114 O6 N1	pos	0.00482771	7.3585	7.0441	7.2022	6.7697	6.9397	6.8005	6.6094	6.8648	6.8009	7.3742	6.9544	7.2244	7.3044	7.0094	6.8743	7.2902	6.7865	7.2916
TG(16:0/10:0/14:0)	TG(16:0/10:0/14:0)+NH4	GL	TG	triglyceride	(16:0/10:0/14:0)	712.645	1052.04	C43 H86 O6 N1	pos	0.0254968	7.1596	6.6625	7.1437	6.6984	6.7919	6.9849	6.8768	6.9763	6.9577	7.1437	7.006	7.1998	7.5322	6.5932	6.6522	7.3903	6.8904	7.1119
TG(16:0/10:0/16:0)	TG(16:0/10:0/16:0)+NH4	GL	TG	triglyceride	(16:0/10:0/16:0)	740.676	1130.78	C45 H90 O6 N1	pos	0.0192977	8.029	7.314	7.8633	7.3939	7.3975	7.7814	7.648	7.7638	7.8954	7.9816	7.8858	8.0304	8.3017	7.3511	7.3636	8.243	7.7903	7.9057
TG(16:0/10:0/18:1)	TG(16:0/10:0/18:1)+NH4	GL	TG	triglyceride	(16:0/10:0/18:1)	766.692	1132.43	C47 H92 O6 N1	pos	0.0316972	8.9016	8.0636	8.6373	8.2156	8.26	8.483	8.3379	8.4367	8.3095	8.8085	8.6565	8.7544	9.1023	8.2335	8.0773	8.9902	8.4229	8.6754
TG(16:0/10:1/10:1)	TG(16:0/10:1/10:1)+NH4	GL	TG	triglyceride	(16:0/10:1/10:1)	652.551	803.159	C39 H74 O6 N1	pos	0.0203359	6.472	6.2907	6.2631	7.4324	6.0925	6.4713	5.8337	6.0596	6.1928	6.5108	6.5678	5.8866	5.9395	6.2205	6.6111	6.263	6.8792	7.043
TG(16:0/10:2/12:2)	TG(16:0/10:2/12:2)+H	GL	TG	triglyceride	(16:0/10:2/12:2)	659.524	859.03	C41 H71 O6	pos	0.020533	6.0217	5.7044	5.8872	6.8729	5.2776	6.2117	5.6209	5.7181	6.0971	6.0018	6.1022	5.5017	5.9149	5.8861	6.2814	5.8904	6.2619	6.522
TG(16:0/11:3/22:1)	TG(16:0/11:3/22:1)+NH4	GL	TG	triglyceride	(16:0/11:3/22:1)	830.723	1006.54	C52 H96 O6 N1	pos	0.0207948	6.8748	6.1379	6.7451	6.0912	6.3369	6.347	7.0619	6.3166	6.0548	6.6706	6.4572	6.708	7.0384	6.3856	6.1028	6.914	6.2127	6.7226
TG(16:0/14:0/16:0)	TG(16:0/14:0/16:0)+NH4	GL	TG	triglyceride	(16:0/14:0/16:0)	796.739	1354.35	C49 H98 O6 N1	pos	0.0888045	6.6935	6.2455	6.1588	6.3699	6.1987	6.7777	6.3769	6.2062	6.5955	6.7966	6.6336	6.6056	7.0866	6.0122	6.1921	7.5243	7.1049	6.4777
TG(16:0/14:0/17:1)	TG(16:0/14:0/17:1)+NH4	GL	TG	triglyceride	(16:0/14:0/17:1)	808.739	1244.38	C50 H98 O6 N1	pos	0.00901298	7.4885	7.0658	7.4863	6.9018	7.0592	7.2471	7.4062	7.2539	7.1696	7.2857	7.4532	7.3416	7.6598	7.0043	7.1392	7.5612	7.1395	7.3253
TG(16:0/14:0/18:1)	TG(16:0/14:0/18:1)+NH4	GL	TG	triglyceride	(16:0/14:0/18:1)	822.755	1324.53	C51 H100 O6 N1	pos	0.187596	6.9888	6.4738	6.9767	6.6343	6.1164	6.7542	6.9193	6.8086	6.9608	6.992	6.8266	6.8802	7.3413	6.4581	6.4627	7.0496	6.8187	6.6147
TG(16:0/14:0/18:3)	TG(16:0/14:0/18:3)+Na	GL	TG	triglyceride	(16:0/14:0/18:3)	823.679	1159.72	C51 H92 O6 Na1	pos	0.0489975	7.582	7.0676	7.4101	7.0639	7.2607	7.3636	7.3602	7.4269	7.2041	7.4469	7.4066	7.5511	7.6001	7.2362	7.1879	7.6272	7.1784	6.8875
TG(16:0/14:2/18:1)	TG(16:0/14:2/18:1)+NH4	GL	TG	triglyceride	(16:0/14:2/18:1)	818.723	1194.92	C51 H96 O6 N1	pos	0.0229355	6.2279	5.3965	6.1609	5.264	5.2892	5.8944	7.0013	5.8826	5.6515	6.3807	6.0755	6.1338	6.4882	5.6628	4.8118	6.2909	5.6449	6.1709
TG(16:0/14:3/19:0)	TG(16:0/14:3/19:0)+NH4	GL	TG	triglyceride	(16:0/14:3/19:0)	832.739	1068.89	C52 H98 O6 N1	pos	0.0109885	7.8602	7.1946	7.7001	7.2991	7.3733	7.3763	7.2219	7.3203	7.1341	7.752	7.5102	7.7205	7.9408	7.2614	7.0947	7.8831	7.3157	7.6634
TG(16:0/16:0/16:0)	TG(16:0/16:0/16:0)+NH4	GL	TG	triglyceride	(16:0/16:0/16:0)	824.77	1486.37	C51 H102 O6 N1	pos	0.104728	8.0116	6.4733	7.7939	7.1546	6.3551	7.9133	7.9717	7.2006	6.6583	7.967	7.8089	8.0188	8.362	7.1099	6.5076	8.1452	8.5536	7.5804
TG(16:1/17:0/18:1)	TG(16:1/17:0/18:1)+NH4	GL	TG	triglyceride	(16:1/17:0/18:1)	862.786	1208.87	C54 H104 O6 N1	pos	0.0335175	8.6123	8.1715	8.4622	8.257	8.1722	8.4363	8.2364	8.4355	8.2405	8.4234	8.4838	8.4609	8.486	8.2109	7.9545	8.5847	8.2758	8.6013
TG(16:1/17:1/18:1)	TG(16:1/17:1/18:1)+NH4	GL	TG	triglyceride	(16:1/17:1/18:1)	860.77	1253.87	C54 H102 O6 N1	pos	0.0190503	8.3278	7.9433	8.3474	7.6047	7.7964	8.0666	8.4316	8.0719	7.8046	8.2844	8.2091	8.3245	8.583	7.9336	7.9207	8.4869	7.9627	8.2741
TG(16:1/17:1/18:2)	TG(16:1/17:1/18:2)+NH4	GL	TG	triglyceride	(16:1/17:1/18:2)	858.755	1183.52	C54 H100 O6 N1	pos	0.00210967	7.558	7.1542	7.228	6.64	6.8292	7.0459	7.3648	7.4013	7.0597	7.1491	7.0746	7.2536	7.5583	6.9367	6.6609	7.82	6.8899	7.1877
TG(16:1/18:1/18:1)	TG(16:1/18:1/18:1)+NH4	GL	TG	triglyceride	(16:1/18:1/18:1)	874.786	1285.57	C55 H104 O6 N1	pos	0.00822079	10.4468	10.2178	10.3438	10.0992	10.1851	10.2679	10.3897	10.3548	10.1473	10.4298	10.3333	10.4548	10.5912	10.1461	10.1648	10.5165	10.1892	10.3467
TG(16:1/18:2/18:2)	TG(16:1/18:2/18:2)+NH4	GL	TG	triglyceride	(16:1/18:2/18:2)	870.755	1154.46	C55 H100 O6 N1	pos	0.0572979	8.6697	7.9444	8.5771	8.1274	8.3271	8.2099	9.0283	8.2299	7.9539	8.519	8.3023	8.517	8.9637	8.0913	8.0414	8.6969	8.0168	8.3413
TG(16:1/18:2/18:3)	TG(16:1/18:2/18:3)+NH4	GL	TG	triglyceride	(16:1/18:2/18:3)	868.739	1095.67	C55 H98 O6 N1	pos	0.00333865	7.1844	6.8948	7.2444	6.6558	6.8626	6.9861	8.188	7.0172	6.6716	7.2141	7.0315	7.3263	7.7382	6.8743	6.8692	7.4211	6.809	7.1575
TG(16:1/6:0/18:1)	TG(16:1/6:0/18:1)+NH4	GL	TG	triglyceride	(16:1/6:0/18:1)	708.614	916.499	C43 H82 O6 N1	pos	0.0964349	6.7848	5.8778	6.558	6.0134	6.0381	6.2482	6.1357	6.2621	5.9363	6.4802	6.3551	6.5044	6.8883	6.0905	5.9329	6.763	6.1542	6.5171
TG(16:1e/18:0/18:0)	TG(16:1e/18:0/18:0)+Na	GL	TG	triglyceride	(16:1e/18:0/18:0)	869.793	1430.14	C55 H106 O5 Na1	pos	0.0101414	6.7593	7.4339	7.0848	7.3265	7.0934	6.7021	7.5871	7.0755	7.6875	6.727	7.1092	6.7947	6.1273	7.426	6.971	6.2378	5.9949	6.8686
TG(16:2e/17:1/22:6)	TG(16:2e/17:1/22:6)+Na	GL	TG	triglyceride	(16:2e/17:1/22:6)	895.715	1287.04	C58 H96 O5 Na1	pos	0.0952055	8.2177	8.6961	8.4359	8.6692	8.6412	8.5223	8.1939	8.7308	8.7649	8.3312	8.4744	8.238	8.1583	8.6148	8.8324	8.5565	8.582	8.5081
TG(16:2e/18:3/20:5)	TG(16:2e/18:3/20:5)+Na	GL	TG	triglyceride	(16:2e/18:3/20:5)	879.684	1188.43	C57 H92 O5 Na1	pos	0.0307804	6.5901	6.3406	6.6056	6.2309	6.0891	6.4476	6.718	6.7868	6.3142	6.4667	6.6396	6.7574	6.7578	6.6284	6.5682	6.5863	6.6209	6.5009
TG(16:2e/19:1/22:6)	TG(16:2e/19:1/22:6)+Na	GL	TG	triglyceride	(16:2e/19:1/22:6)	923.746	1338.71	C60 H100 O5 Na1	pos	0.0319777	7.7632	8.4215	7.8659	8.2274	8.204	7.9649	8.0558	7.9809	8.1997	8.2065	7.8597	8.0588	7.2857	8.3508	8.346	7.7953	7.7186	7.9411
TG(16:2e/20:3/20:3)	TG(16:2e/20:3/20:3)+Na	GL	TG	triglyceride	(16:2e/20:3/20:3)	911.746	1356.63	C59 H100 O5 Na1	pos	0.0054892	7.7596	7.6567	7.6986	7.555	7.6066	7.597	7.575	7.6332	7.8161	7.5643	7.7539	7.6965	7.399	7.5961	7.7246	7.649	7.7129	7.6763
TG(16:2e/20:5/20:5)	TG(16:2e/20:5/20:5)+H	GL	TG	triglyceride	(16:2e/20:5/20:5)	881.702	1253.82	C59 H93 O5	pos	0.0365343	7.2836	7.3147	7.3809	7.0103	7.1464	7.3098	7.3794	7.3822	7.2541	7.2714	7.3409	7.3938	7.1775	7.2784	7.3764	7.3832	7.3027	7.3573
TG(16:2e/20:5/21:1)	TG(16:2e/20:5/21:1)+Na	GL	TG	triglyceride	(16:2e/20:5/21:1)	925.762	1376.19	C60 H102 O5 Na1	pos	0.0107194	7.7871	8.0986	7.761	8.2406	8.1311	7.8049	7.7164	7.8088	8.1508	7.6666	7.8407	7.6949	7.2095	8.0376	8.15	7.5029	7.9069	7.7925
TG(17:0/10:0/18:1)	TG(17:0/10:0/18:1)+NH4	GL	TG	triglyceride	(17:0/10:0/18:1)	780.708	1170.97	C48 H94 O6 N1	pos	0.0399903	7.1644	6.6605	7.1073	6.5762	6.7603	6.8009	6.9498	6.7665	6.8578	6.9509	7.008	7.0309	7.2866	6.6927	6.7835	7.2037	6.8144	7.0033
TG(17:0/11:1/12:3)	TG(17:0/11:1/12:3)+H	GL	TG	triglyceride	(17:0/11:1/12:3)	687.556	903.483	C43 H75 O6	pos	0.0379207	6.6488	6.6962	6.2771	6.6867	6.5547	6.0664	6.8442	6.2627	6.4156	6.3191	6.2169	6.4142	6.6973	5.9967	5.5934	6.7908	6.4021	6.4502
TG(17:0/17:0/22:0)	TG(17:0/17:0/22:0)+NH4	GL	TG	triglyceride	(17:0/17:0/22:0)	936.895	1414.24	C59 H118 O6 N1	pos	0.0191169	7.8725	7.5237	7.7163	7.6784	7.6172	7.9648	7.7379	7.6985	8.1465	7.8102	7.8848	7.8163	7.5288	7.5862	7.8522	7.7896	8.0497	7.9866
TG(17:0/18:3/20:5)	TG(17:0/18:3/20:5)+Na	GL	TG	triglyceride	(17:0/18:3/20:5)	911.71	1058.59	C58 H96 O6 Na1	pos	0.0211121	7.335	6.521	7.1479	6.9523	6.5382	7.1541	6.9285	6.8713	6.6324	7.106	7.0975	6.9521	7.301	6.9903	6.8678	7.3337	7.0866	6.8607
TG(17:0/19:0/19:0)	TG(17:0/19:0/19:0)+NH4	GL	TG	triglyceride	(17:0/19:0/19:0)	922.88	1699.46	C58 H116 O6 N1	pos	0.0881901	8.0456	5.7596	8.3793	7.9489	5.9005	7.1249	6.803	7.2796	6.1602	8.4193	7.7782	8.0928	7.7233	7.7449	6.5566	7.6048	8.4518	7.5452
TG(17:0/21:0/21:0)	TG(17:0/21:0/21:0)+NH4	GL	TG	triglyceride	(17:0/21:0/21:0)	978.942	1473.23	C62 H124 O6 N1	pos	0.0301046	6.6634	6.5304	6.746	6.8496	6.6862	7.2122	6.9319	6.8022	7.1228	6.5492	7.2665	6.761	6.5633	6.6295	6.8916	6.7253	7.0123	6.8925
TG(18:0/10:0/16:0)	TG(18:0/10:0/16:0)+NH4	GL	TG	triglyceride	(18:0/10:0/16:0)	768.708	1208.73	C47 H94 O6 N1	pos	0.0226471	8.5405	7.7629	8.4354	7.7749	7.8808	8.2794	8.1239	8.3017	8.4719	8.4385	8.3922	8.5448	8.7392	7.8559	7.9065	8.7263	8.3014	8.4445
TG(18:0/10:0/18:1)	TG(18:0/10:0/18:1)+NH4	GL	TG	triglyceride	(18:0/10:0/18:1)	794.723	1209.23	C49 H96 O6 N1	pos	0.00962649	9.3082	8.4514	9.1094	8.5344	8.628	8.89	8.8156	8.8874	8.7579	9.1277	9.0605	9.1707	9.4255	8.5787	8.4675	9.386	8.8353	9.0977
TG(18:0/10:0/20:4)	TG(18:0/10:0/20:4)+NH4	GL	TG	triglyceride	(18:0/10:0/20:4)	816.708	1119.71	C51 H94 O6 N1	pos	0.0104683	6.7986	6.1912	6.6912	5.5657	6.2415	6.4134	6.9332	6.3425	6.2585	6.8983	6.4623	6.7509	7.0029	6.147	5.9939	6.7732	6.2822	6.7878
TG(18:0/16:0/16:0)	TG(18:0/16:0/16:0)+NH4	GL	TG	triglyceride	(18:0/16:0/16:0)	852.802	1379.08	C53 H106 O6 N1	pos	0.013092	9.4792	9.2551	9.4631	9.5154	9.2951	9.86	9.7064	9.555	9.8179	9.5292	9.6298	9.4886	10.0058	9.2703	9.5897	9.9157	10.083	9.6058
TG(18:0/16:0/17:0)	TG(18:0/16:0/17:0)+NH4	GL	TG	triglyceride	(18:0/16:0/17:0)	866.817	1356.91	C54 H108 O6 N1	pos	0.00815112	8.429	7.9516	8.3948	7.847	7.8337	8.2312	8.2991	8.2023	8.377	8.3412	8.4939	8.394	8.5126	7.9522	7.9681	8.5193	8.3675	8.2575
TG(18:0/16:0/18:0)	TG(18:0/16:0/18:0)+Na	GL	TG	triglyceride	(18:0/16:0/18:0)	885.788	1732.43	C55 H106 O6 Na1	pos	0.0683538	7.4249	4.8379	8.373	7.201	5.4601	6.814	6.5719	7.2202	5.9132	8.1783	7.1723	7.9197	7.6515	7.6511	6.2314	7.2989	8.0328	7.2908
TG(18:0/16:0/18:1)	TG(18:0/16:0/18:1)+NH4	GL	TG	triglyceride	(18:0/16:0/18:1)	878.817	1852.14	C55 H108 O6 N1	pos	0.0712413	6.7766	6.2935	6.4256	7.0612	6.1736	6.7426	6.9268	6.466	7.0432	6.2481	6.3643	6.8531	6.1345	6.5356	6.4372	6.566	6.5369	6.4506
TG(18:0/16:0/18:2)	TG(18:0/16:0/18:2)+NH4	GL	TG	triglyceride	(18:0/16:0/18:2)	876.802	1134.11	C55 H106 O6 N1	pos	0.0472942	7.5649	7.0194	7.3056	7.125	7.1566	7.0979	7.0803	7.0976	7.2109	7.4178	7.2796	7.4193	7.4236	7.1556	6.8752	7.4882	7.1281	7.3693
TG(18:0/16:0/18:3)	TG(18:0/16:0/18:3)+NH4	GL	TG	triglyceride	(18:0/16:0/18:3)	874.786	1069.61	C55 H104 O6 N1	pos	0.0926552	6.8502	6.3453	6.7409	6.2966	6.4669	6.4456	7.2367	6.3828	7.0254	6.7576	7.0716	6.7384	6.8924	6.3532	6.6643	6.8057	7.1836	6.7739
TG(18:0/16:0/19:0)	TG(18:0/16:0/19:0)+NH4	GL	TG	triglyceride	(18:0/16:0/19:0)	894.848	1387.44	C56 H112 O6 N1	pos	0.0469874	8.2771	8.1006	8.113	8.3105	8.0767	8.6851	8.2761	8.4847	8.8302	8.3085	8.3437	8.2478	8.1268	8.0988	8.447	8.6095	9.1872	8.3393
TG(18:0/16:0/21:0)	TG(18:0/16:0/21:0)+NH4	GL	TG	triglyceride	(18:0/16:0/21:0)	922.88	1502.74	C58 H116 O6 N1	pos	0.0121408	8.7938	6.1617	8.3351	7.787	6.2826	8.4996	7.7813	8.0328	7.1306	8.7214	8.4616	8.5258	8.3537	7.6155	6.7322	8.5438	8.7518	8.475
TG(18:0/16:0/22:6)	TG(18:0/16:0/22:6)+H	GL	TG	triglyceride	(18:0/16:0/22:6)	907.775	1363.82	C59 H103 O6	pos	0.0462873	7.9339	7.7003	7.7892	8.3248	7.5775	7.6444	7.8386	7.7157	7.8055	7.8852	7.7946	7.8692	7.7443	7.6995	8.2659	7.8577	8.4274	7.8627
TG(18:0/16:0/23:0)	TG(18:0/16:0/23:0)+NH4	GL	TG	triglyceride	(18:0/16:0/23:0)	950.911	1446.71	C60 H120 O6 N1	pos	0.023459	7.9601	7.8161	8.0998	8.0171	7.8399	8.4101	8.0996	7.9951	8.2628	8.1303	8.1578	7.9524	7.7757	7.8254	8.1406	8.1755	8.1434	8.1102
TG(18:0/16:0/24:0)	TG(18:0/16:0/24:0)+NH4	GL	TG	triglyceride	(18:0/16:0/24:0)	964.927	1415.83	C61 H122 O6 N1	pos	0.0589517	7.7759	7.5831	7.7429	7.8772	7.6211	8.1448	7.7664	7.794	8.185	7.9776	7.9656	7.7421	7.4466	7.6	8.017	8.0965	8.4094	7.9942
TG(18:0/16:1/18:0)	TG(18:0/16:1/18:0)+NH4	GL	TG	triglyceride	(18:0/16:1/18:0)	878.817	1208.96	C55 H108 O6 N1	pos	0.0444899	7.3414	6.9693	7.2912	7.1508	6.9793	7.1392	6.9122	7.1736	7.1832	7.1493	7.326	7.2424	6.8775	7.1073	6.8815	6.9744	7.145	7.2484
TG(18:0/17:0/18:0)	TG(18:0/17:0/18:0)+NH4	GL	TG	triglyceride	(18:0/17:0/18:0)	894.848	1617.81	C56 H112 O6 N1	pos	0.0866367	8.0043	5.555	8.2551	8.2037	5.4848	7.3738	7.6256	7.8218	5.9414	8.412	7.9684	8.2281	7.8185	7.7276	6.582	7.8326	8.1791	7.7386
TG(18:0/17:0/18:1)	TG(18:0/17:0/18:1)+NH4	GL	TG	triglyceride	(18:0/17:0/18:1)	892.833	1397.02	C56 H110 O6 N1	pos	0.0133132	8.8275	8.2267	8.7656	8.0287	8.1421	8.476	8.5108	8.4444	8.7499	8.6939	8.7626	8.6348	8.9005	8.3524	8.3098	8.824	8.6284	8.5643
TG(18:0/17:0/20:4)	TG(18:0/17:0/20:4)+H	GL	TG	triglyceride	(18:0/17:0/20:4)	897.791	1397.03	C58 H105 O6	pos	0.00741567	7.9763	7.8837	8.0389	7.7107	7.8187	7.8025	7.8868	7.9686	8.3544	7.8653	8.0183	7.9873	7.6203	7.8765	8.0013	7.8005	7.8604	7.9419
TG(18:0/18:0/18:0)	TG(18:0/18:0/18:0)+Na	GL	TG	triglyceride	(18:0/18:0/18:0)	913.819	1446.52	C57 H110 O6 Na1	pos	0.0187977	7.6726	7.9539	8.0533	8.1705	7.99	8.3848	8.1198	8.0826	8.4373	7.7775	8.1024	7.9607	7.6294	7.9889	8.3364	7.7292	8.324	8.2073
TG(18:0/18:0/18:1)	TG(18:0/18:0/18:1)+NH4	GL	TG	triglyceride	(18:0/18:0/18:1)	906.848	1377.43	C57 H112 O6 N1	pos	0.00686227	9.6542	9.2983	9.5248	9.484	9.4306	9.3976	9.482	9.4418	9.598	9.5923	9.601	9.5391	9.3813	9.3836	9.4535	9.5762	9.5008	9.5489
TG(18:0/18:0/19:0)	TG(18:0/18:0/19:0)+NH4	GL	TG	triglyceride	(18:0/18:0/19:0)	922.88	1523.47	C58 H116 O6 N1	pos	0.0613424	8.5858	6.2217	8.648	8.1566	6.2048	8.7144	8.0303	8.1115	6.8146	8.5561	8.6493	8.8384	8.2747	8.0453	6.8074	8.9508	8.8661	8.3626
TG(18:0/18:0/20:0)	TG(18:0/18:0/20:0)+Na	GL	TG	triglyceride	(18:0/18:0/20:0)	941.851	1472.05	C59 H114 O6 Na1	pos	0.0361786	6.7932	6.3586	6.6156	6.8323	6.3742	7.169	7.0199	6.815	7.1829	6.7196	6.8757	6.7042	6.1566	6.6666	6.9553	6.8615	7.2642	6.8887
TG(18:0/18:0/20:1)	TG(18:0/18:0/20:1)+NH4	GL	TG	triglyceride	(18:0/18:0/20:1)	934.88	1397.01	C59 H116 O6 N1	pos	0.00328509	8.0145	7.7012	8.0384	7.5523	7.6645	7.7862	7.8048	7.8119	8.2123	7.938	7.9603	7.9264	7.7809	7.7614	7.8691	7.9146	7.8962	7.8731
TG(18:0/18:0/20:2)	TG(18:0/18:0/20:2)+NH4	GL	TG	triglyceride	(18:0/18:0/20:2)	932.864	1335.13	C59 H114 O6 N1	pos	0.0336758	7.8224	7.7638	7.9719	8.2501	8.207	8.116	7.8295	7.8582	8.3539	7.8217	7.8363	7.5526	7.4633	7.8499	8.1115	7.8436	7.8859	7.8542
TG(18:0/18:0/20:4)	TG(18:0/18:0/20:4)+NH4	GL	TG	triglyceride	(18:0/18:0/20:4)	928.833	1371.64	C59 H110 O6 N1	pos	0.0200412	7.7112	7.3112	7.6909	7.2667	7.3416	7.4202	7.542	7.4557	7.6719	7.91	7.6264	7.7787	7.9909	7.414	7.2594	7.8484	7.5128	7.7578
TG(18:0/18:0/22:2)	TG(18:0/18:0/22:2)+NH4	GL	TG	triglyceride	(18:0/18:0/22:2)	960.895	1376.21	C61 H118 O6 N1	pos	0.0235716	7.1014	7.4496	7.0725	7.6659	7.5205	7.3879	7.1079	7.304	7.5381	7.1921	7.1228	7.29	6.8898	7.4821	7.7525	7.2315	7.2797	7.3375
TG(18:0/18:1/18:1)	TG(18:0/18:1/18:1)+NH4	GL	TG	triglyceride	(18:0/18:1/18:1)	904.833	1810.52	C57 H110 O6 N1	pos	0.117539	6.5179	5.9861	6.2192	5.8582	5.7835	6.2659	6.1551	6.149	6.1828	6.4825	6.7728	6.2577	6.4776	6.3048	6.0953	6.7141	6.476	6.4854
TG(18:0/18:1/19:0)	TG(18:0/18:1/19:0)+NH4	GL	TG	triglyceride	(18:0/18:1/19:0)	920.864	1379.08	C58 H114 O6 N1	pos	0.100949	9.0781	9.1417	9.0573	9.4075	9.2228	9.1097	8.9756	9.2479	9.6395	9.2181	8.9297	9.1625	8.5299	9.1711	9.4024	8.8523	9.2774	9.0984
TG(18:0/18:1/20:0)	TG(18:0/18:1/20:0)+NH4	GL	TG	triglyceride	(18:0/18:1/20:0)	934.88	1446.04	C59 H116 O6 N1	pos	0.0195445	8.573	7.8121	7.2602	8.0108	7.9894	8.2574	8.3314	8.2563	8.4751	8.5331	8.6444	8.3897	8.6834	7.9924	7.9966	8.6547	7.772	8.3571
TG(18:0/18:1/20:1)	TG(18:0/18:1/20:1)+NH4	GL	TG	triglyceride	(18:0/18:1/20:1)	932.864	1356.82	C59 H114 O6 N1	pos	0.0050181	8.3062	8.0311	8.1943	7.9327	7.9422	8.06	8.064	8.0482	8.1461	8.1497	8.27	8.2301	8.0947	7.9663	8.0675	8.2875	8.1672	8.1705
TG(18:0/18:1/20:2)	TG(18:0/18:1/20:2)+NH4	GL	TG	triglyceride	(18:0/18:1/20:2)	930.848	1308.61	C59 H112 O6 N1	pos	0.0987857	8.33	8.085	8.2042	7.912	8.0941	8.1645	8.2664	8.1592	8.1032	7.9977	8.3292	8.0665	8.0455	8.0985	8.0857	8.1758	8.2278	8.3713
TG(18:0/18:1/21:1)	TG(18:0/18:1/21:1)+NH4	GL	TG	triglyceride	(18:0/18:1/21:1)	946.88	1376.19	C60 H116 O6 N1	pos	0.0420514	8.1941	8.6556	8.3312	8.8522	8.761	8.5213	8.2912	8.4096	8.6698	8.5966	8.43	8.354	8.0285	8.6702	8.7976	8.0479	8.1628	8.4462
TG(18:0/18:1/22:4)	TG(18:0/18:1/22:4)+NH4	GL	TG	triglyceride	(18:0/18:1/22:4)	954.848	1358.07	C61 H112 O6 N1	pos	0.0167665	8.2379	7.744	7.9205	7.6211	7.6981	7.6782	7.801	7.7725	7.7671	8.2349	7.86	8.0551	8.2682	7.7619	7.6115	8.1694	7.8259	8.0775
TG(18:0/18:1/24:0)	TG(18:0/18:1/24:0)+NH4	GL	TG	triglyceride	(18:0/18:1/24:0)	990.942	1496.27	C63 H124 O6 N1	pos	0.0142069	6.0628	6.3226	5.719	6.4041	6.4769	6.6421	6.9078	6.5519	6.8537	6.0848	7.0019	5.6805	6.2377	6.4596	6.3624	6.0531	6.1441	6.7026
TG(18:0/8:0/11:4)	TG(18:0/8:0/11:4)+NH4	GL	TG	triglyceride	(18:0/8:0/11:4)	662.535	808.13	C40 H72 O6 N1	pos	0.0310367	7.5689	7.5459	7.4575	7.793	7.7304	7.6692	7.2325	7.6888	7.6419	7.5814	7.6488	7.5818	7.2042	7.7943	8.0033	7.4479	7.5681	7.6391
TG(18:0e/14:0/16:1)	TG(18:0e/14:0/16:1)+NH4	GL	TG	triglyceride	(18:0e/14:0/16:1)	808.775	1355.04	C51 H102 O5 N1	pos	0.0149508	7.1356	6.9531	6.8942	6.8516	6.6499	6.8548	7.3484	6.8993	7.1124	6.8667	7.2527	6.8117	7.0448	7.0162	6.5472	6.8139	6.8699	6.9327
TG(18:0e/16:0/16:0)	TG(18:0e/16:0/16:0)+Na	GL	TG	triglyceride	(18:0e/16:0/16:0)	843.778	1431.85	C53 H104 O5 Na1	pos	0.0190554	5.1278	7.5146	6.8955	7.3627	7.2174	6.8685	7.7932	7.0553	7.7892	6.4998	7.1143	6.7964	5.8102	7.5532	7.0703	5.0276	6.9815	6.8698
TG(18:0e/16:0/18:0)	TG(18:0e/16:0/18:0)+NH4	GL	TG	triglyceride	(18:0e/16:0/18:0)	866.854	1460.81	C55 H112 O5 N1	pos	0.033898	6.8338	7.0687	6.7817	6.7964	6.5941	7.0094	7.7146	6.6297	7.1047	6.7884	7.2268	6.6421	6.5026	7.1167	6.0668	6.6255	7.406	6.7706
TG(18:0e/18:1/18:1)	TG(18:0e/18:1/18:1)+NH4	GL	TG	triglyceride	(18:0e/18:1/18:1)	890.854	1430.65	C57 H112 O5 N1	pos	0.020983	6.8782	6.9137	6.881	6.7855	6.6117	6.5235	7.618	6.5863	7.0672	6.8653	7.1772	6.662	6.6075	7.0053	6.3936	5.7683	6.9157	6.7245
TG(18:1/10:1/18:1)	TG(18:1/10:1/18:1)+NH4	GL	TG	triglyceride	(18:1/10:1/18:1)	790.692	1086.06	C49 H92 O6 N1	pos	0.0251225	7.6893	6.9066	7.4314	6.9439	7.1281	7.1293	7.3327	7.1113	6.8391	7.3894	7.3278	7.4875	7.8076	6.9565	6.8883	7.6308	7.0602	7.3974
TG(18:1/10:3/10:3)	TG(18:1/10:3/10:3)+H	GL	TG	triglyceride	(18:1/10:3/10:3)	653.478	877.047	C41 H65 O6	pos	0.00759311	7.9039	7.9947	7.7466	7.9139	7.9959	7.954	7.5686	8.0095	8.1002	7.863	7.9572	7.9045	7.5338	8.1737	8.4095	7.8102	7.9608	7.9817
TG(18:1/11:2/24:1)	TG(18:1/11:2/24:1)+NH4	GL	TG	triglyceride	(18:1/11:2/24:1)	886.786	1151.46	C56 H104 O6 N1	pos	0.0729602	7.4539	7.169	7.8965	7.0671	7.5727	7.2492	8.1229	7.5009	7.0462	7.8855	7.4085	7.9715	7.8306	7.1546	7.208	7.712	7.3315	7.5075
TG(18:1/12:0/20:4)	TG(18:1/12:0/20:4)+NH4	GL	TG	triglyceride	(18:1/12:0/20:4)	842.723	1118.61	C53 H96 O6 N1	pos	0.0192477	7.0299	6.4438	6.9659	6.1319	6.6728	6.7217	7.1075	6.6342	6.5082	7.0854	6.6297	6.9722	7.2767	6.5724	6.2064	6.9974	6.4445	7.0627
TG(18:1/12:4/23:0)	TG(18:1/12:4/23:0)+NH4	GL	TG	triglyceride	(18:1/12:4/23:0)	884.77	1338.26	C56 H102 O6 N1	pos	0.0518152	7.6175	8.1258	7.6612	8.3964	8.2322	7.8155	7.5105	7.6596	8.2135	7.7383	7.6678	7.7532	7.3162	8.1911	7.8764	7.8506	7.8547	7.9024
TG(18:1/13:0/20:5)	TG(18:1/13:0/20:5)+H	GL	TG	triglyceride	(18:1/13:0/20:5)	837.697	1198.54	C54 H93 O6	pos	0.0220596	6.4	6.1369	6.5007	5.7827	5.9999	6.1827	6.6795	6.217	5.965	6.3208	6.3137	6.3413	6.3575	6.1891	6.3871	6.5055	6.0225	6.2826
TG(18:1/14:0/17:1)	TG(18:1/14:0/17:1)+NH4	GL	TG	triglyceride	(18:1/14:0/17:1)	834.755	1244.97	C52 H100 O6 N1	pos	0.020668	8.2741	7.7223	8.2257	7.5077	7.6717	7.9256	7.8689	7.8909	7.6583	8.0055	8.121	8.0316	8.4212	7.6603	7.4924	8.2757	7.7713	8.0265
TG(18:1/14:0/18:2)	TG(18:1/14:0/18:2)+NH4	GL	TG	triglyceride	(18:1/14:0/18:2)	846.755	1144.04	C53 H100 O6 N1	pos	0.0195416	7.7417	7.26	7.6734	7.1292	7.304	7.4857	8.0505	7.3963	7.1148	7.5537	7.8309	7.6098	8.0344	7.1786	6.9864	7.8123	7.1099	7.6647
TG(18:1/17:1/18:1)	TG(18:1/17:1/18:1)+NH4	GL	TG	triglyceride	(18:1/17:1/18:1)	888.802	1308.53	C56 H106 O6 N1	pos	0.0332951	9.2992	8.7696	9.1558	8.502	8.7448	8.87	9.1087	8.8497	8.7221	9.1029	9.1719	9.0549	9.3793	8.7821	8.7105	9.1653	8.9071	9.1183
TG(18:1/17:1/18:2)	TG(18:1/17:1/18:2)+NH4	GL	TG	triglyceride	(18:1/17:1/18:2)	886.786	1255.37	C56 H104 O6 N1	pos	0.0246609	8.4346	7.9342	8.3713	7.6761	7.9607	8.0534	8.3105	8.0637	7.8075	8.32	8.1823	8.358	8.5769	8.0176	7.9112	8.6192	7.9774	8.274
TG(18:1/17:1/20:4)	TG(18:1/17:1/20:4)+NH4	GL	TG	triglyceride	(18:1/17:1/20:4)	910.786	1232.78	C58 H104 O6 N1	pos	0.0224605	7.0486	6.542	7.0746	5.548	6.5024	6.6289	6.5004	6.3783	5.8761	7.0587	6.6327	6.7992	7.181	6.6005	5.8666	6.8838	6.447	6.7837
TG(18:1/17:1/23:0)	TG(18:1/17:1/23:0)+NH4	GL	TG	triglyceride	(18:1/17:1/23:0)	960.895	1338.03	C61 H118 O6 N1	pos	0.103965	7.8861	8.3153	8.0553	8.2055	8.4336	8.2354	7.9011	7.9415	8.4156	8.0152	7.7157	8.0034	7.5884	8.3307	8.5549	7.8781	8.1215	7.9842
TG(18:1/18:1/18:1)	TG(18:1/18:1/18:1)+H	GL	TG	triglyceride	(18:1/18:1/18:1)	885.791	1337.24	C57 H105 O6	pos	0.0499943	7.2677	7.3	7.4736	7.2993	6.9734	7.118	7.8666	6.9467	7.148	7.5749	7.2392	7.5396	7.3889	7.3939	7.1362	7.6881	7.3362	7.6503
TG(18:1/18:1/18:2)	TG(18:1/18:1/18:2)+NH4	GL	TG	triglyceride	(18:1/18:1/18:2)	900.802	1254.05	C57 H106 O6 N1	pos	0.0254725	8.2735	8.0532	8.1682	7.6375	7.606	7.8302	8.2633	7.8809	7.8353	8.3553	8.1763	8.0607	8.3123	7.6015	7.7059	8.6153	7.5866	8.3697
TG(18:1/18:1/18:3)	TG(18:1/18:1/18:3)+NH4	GL	TG	triglyceride	(18:1/18:1/18:3)	898.786	1194.92	C57 H104 O6 N1	pos	0.0175568	7.7032	7.251	7.5269	7.0721	7.3233	7.2751	7.5564	7.2019	7.5642	8.0903	7.378	7.4857	7.9131	7.1693	7.1596	7.6574	7.2448	7.5602
TG(18:1/18:1/20:2)	TG(18:1/18:1/20:2)+NH4	GL	TG	triglyceride	(18:1/18:1/20:2)	928.833	1289.87	C59 H110 O6 N1	pos	0.0951155	8.4964	8.3475	8.4546	8.2203	8.4381	8.1822	8.5538	8.412	8.4094	8.7745	8.4439	8.5661	8.4604	8.4503	8.4339	8.5501	8.2843	8.4994
TG(18:1/18:1/20:3)	TG(18:1/18:1/20:3)+NH4	GL	TG	triglyceride	(18:1/18:1/20:3)	926.817	1325.04	C59 H108 O6 N1	pos	0.0242036	8.7693	8.1965	8.6317	8.1414	8.2461	8.3821	8.433	8.3631	8.3726	8.871	8.5456	8.6906	8.9245	8.3461	8.1951	8.7931	8.2915	8.6442
TG(18:1/18:1/21:1)	TG(18:1/18:1/21:1)+NH4	GL	TG	triglyceride	(18:1/18:1/21:1)	944.864	1365.12	C60 H114 O6 N1	pos	0.0103402	7.8809	7.8068	7.962	7.743	7.6422	7.7167	8.1905	7.9926	7.6975	7.8675	7.9217	7.9327	7.7071	7.9815	8.1002	7.8367	7.7467	7.8519
TG(18:1/18:1/22:1)	TG(18:1/18:1/22:1)+NH4	GL	TG	triglyceride	(18:1/18:1/22:1)	958.88	1286.98	C61 H116 O6 N1	pos	0.0514288	7.6645	8.0307	7.6424	8.0157	8.0518	7.6765	7.6879	7.8067	8.1306	7.6949	7.8916	7.6937	7.2903	8.0299	8.107	7.5701	7.7878	7.7349
TG(18:1/18:1/22:3)	TG(18:1/18:1/22:3)+NH4	GL	TG	triglyceride	(18:1/18:1/22:3)	954.848	1341.22	C61 H112 O6 N1	pos	0.0381806	7.7876	7.3405	7.6436	7.2377	7.5192	7.3468	7.6328	7.3523	7.4018	8.0278	7.7109	7.6331	7.9432	7.4043	7.4576	7.8963	7.3391	7.8704
TG(18:1/18:1/22:4)	TG(18:1/18:1/22:4)+NH4	GL	TG	triglyceride	(18:1/18:1/22:4)	952.833	1311.04	C61 H110 O6 N1	pos	0.0266783	8.4768	7.923	8.1386	7.6899	7.8993	7.8082	8.1242	7.7557	7.8928	8.49	8.1001	8.208	8.5581	7.9409	7.7307	8.3432	7.8108	8.2715
TG(18:1/18:1/22:5)	TG(18:1/18:1/22:5)+NH4	GL	TG	triglyceride	(18:1/18:1/22:5)	950.817	1264.76	C61 H108 O6 N1	pos	0.049871	8.1726	7.68	7.9947	7.4589	7.6807	7.5197	7.5537	7.5434	7.4287	8.1876	7.6682	7.9706	8.3077	7.7339	7.5885	8.0781	7.482	8.0158
TG(18:1/18:1/24:0)	TG(18:1/18:1/24:0)+NH4	GL	TG	triglyceride	(18:1/18:1/24:0)	988.927	1470.36	C63 H122 O6 N1	pos	0.032461	7.3486	6.6997	7.0092	6.6893	6.7797	6.8493	7.2595	6.9208	7.0761	7.2998	7.2238	7.1199	7.3783	6.8208	6.7021	7.2325	6.9772	7.0045
TG(18:1/18:1/24:1)	TG(18:1/18:1/24:1)+NH4	GL	TG	triglyceride	(18:1/18:1/24:1)	986.911	1440.66	C63 H120 O6 N1	pos	0.0135068	7.2756	6.8066	7.0231	6.6398	6.8269	6.8277	6.9439	6.9327	6.9932	7.3198	7.196	7.051	7.3788	6.8193	6.656	7.2695	5.6613	7.0519
TG(18:1/18:2/18:2)	TG(18:1/18:2/18:2)+NH4	GL	TG	triglyceride	(18:1/18:2/18:2)	898.786	1228.8	C57 H104 O6 N1	pos	0.0321356	9.4957	8.972	9.4704	8.8546	9.1656	9.135	9.9519	9.2582	8.9337	9.555	9.3877	9.5511	9.6911	9.1351	9.2179	9.7106	9.1077	9.4454
TG(18:1/18:2/20:2)	TG(18:1/18:2/20:2)+NH4	GL	TG	triglyceride	(18:1/18:2/20:2)	926.817	1229.65	C59 H108 O6 N1	pos	0.056051	8.3765	7.8058	8.3565	7.6752	8.0015	8.077	8.2372	8.0304	7.7866	8.2747	8.1207	8.2658	8.1677	7.9567	8.0488	8.47	7.9203	8.1889
TG(18:1/18:2/20:4)	TG(18:1/18:2/20:4)+NH4	GL	TG	triglyceride	(18:1/18:2/20:4)	922.786	1205.57	C59 H104 O6 N1	pos	0.0641827	8.2001	7.616	8.1829	7.404	7.7144	7.7184	8.0814	7.7237	7.5284	8.208	7.9876	8.0618	8.3619	7.7778	7.5199	8.132	7.5535	8.0593
TG(18:1/18:2/21:1)	TG(18:1/18:2/21:1)+NH4	GL	TG	triglyceride	(18:1/18:2/21:1)	942.848	1324.88	C60 H112 O6 N1	pos	0.0224927	7.8363	7.6539	7.7581	7.5519	7.5712	7.6548	7.7095	7.7328	8.0163	7.9622	7.7903	7.8494	7.9926	7.605	7.6266	7.8698	7.6419	7.8195
TG(18:1/18:2/22:5)	TG(18:1/18:2/22:5)+NH4	GL	TG	triglyceride	(18:1/18:2/22:5)	948.802	1203.07	C61 H106 O6 N1	pos	0.0116234	7.2948	6.8476	7.237	6.4816	6.9006	6.8163	7.1735	6.8416	6.6402	7.344	6.9183	7.3027	7.6014	6.9927	6.7685	7.3583	6.5799	7.3246
TG(18:1/18:2/22:6)	TG(18:1/18:2/22:6)+NH4	GL	TG	triglyceride	(18:1/18:2/22:6)	946.786	1175.41	C61 H104 O6 N1	pos	0.0207112	6.8902	6.4773	6.981	6.1123	6.3412	6.3771	6.6914	6.4865	6.2018	6.6381	6.4829	6.7784	7.2946	6.317	6.2712	6.9299	6.3429	6.691
TG(18:1/18:2/24:1)	TG(18:1/18:2/24:1)+NH4	GL	TG	triglyceride	(18:1/18:2/24:1)	984.895	1411.65	C63 H118 O6 N1	pos	0.0406246	7.0953	6.4402	6.7788	6.1099	6.6312	6.0808	6.8472	6.2693	6.6275	7.0823	6.0526	6.9853	7.1601	6.3501	5.9808	7.0984	5.641	6.8805
TG(18:1/20:5/20:5)	TG(18:1/20:5/20:5)+H	GL	TG	triglyceride	(18:1/20:5/20:5)	925.728	1141.91	C61 H97 O6	pos	0.0519686	6.8963	6.6332	6.9071	6.3659	6.7444	6.6264	7.0677	6.7232	6.4243	6.8046	6.6951	6.9868	6.9841	6.5738	6.6385	6.9503	6.5788	6.8071
TG(18:1e/16:0/16:0)	TG(18:1e/16:0/16:0)+NH4	GL	TG	triglyceride	(18:1e/16:0/16:0)	836.807	1395.97	C53 H106 O5 N1	pos	0.0101009	7.7382	7.597	7.7137	7.4957	7.2068	7.4566	7.9346	7.4338	7.8412	7.6233	7.8775	7.3421	7.6348	7.6883	7.1347	7.548	7.5293	7.4528
TG(18:1e/16:0/18:1)	TG(18:1e/16:0/18:1)+NH4	GL	TG	triglyceride	(18:1e/16:0/18:1)	862.822	1394.9	C55 H108 O5 N1	pos	0.00568022	7.6845	7.5403	7.6385	7.4368	7.2475	7.4152	7.9845	7.3848	7.7118	7.4423	7.709	7.3947	7.5265	7.6703	7.1252	7.3745	7.321	7.46
TG(18:1e/18:1/18:1)	TG(18:1e/18:1/18:1)+NH4	GL	TG	triglyceride	(18:1e/18:1/18:1)	888.838	1398.41	C57 H110 O5 N1	pos	0.0107788	6.969	6.8744	7.005	6.764	6.6496	6.8969	7.5959	6.6844	6.9451	6.9535	7.2245	6.6977	6.6203	7.039	6.3954	6.7432	7.041	6.8015
TG(16:0/18:1/24:0)	TG(16:0/18:1/24:0)+NH4	GL	TG	triglyceride	(16:0/18:1/24:0)	962.911	1472.38	C61 H120 O6 N1	pos	0.020012	7.1997	7.0826	7.0619	7.2178	7.1962	7.6387	7.6149	7.5025	7.6774	7.1568	7.8531	7.6779	7.9188	7.2837	7.1771	7.2418	7.2687	7.541
TG(16:0/18:1/24:1)	TG(16:0/18:1/24:1)+NH4	GL	TG	triglyceride	(16:0/18:1/24:1)	960.895	1442.45	C61 H118 O6 N1	pos	0.0129704	8.0295	7.3856	7.7487	7.457	7.4805	7.6433	7.8397	7.6182	7.7738	7.9943	8.0285	7.7788	8.085	7.46	7.3475	8.018	7.7156	7.7495
TG(16:0/18:2/20:5)	TG(16:0/18:2/20:5)+H	GL	TG	triglyceride	(16:0/18:2/20:5)	877.728	1225.38	C57 H97 O6	pos	0.0838296	8.9521	8.485	8.8767	8.4881	8.6706	8.8521	8.5523	8.6925	8.5682	8.5513	8.7298	8.715	8.4966	8.7089	8.8532	9.0022	8.8191	8.5707
TG(16:0/18:2/22:6)	TG(16:0/18:2/22:6)+NH4	GL	TG	triglyceride	(16:0/18:2/22:6)	920.77	1172.37	C59 H102 O6 N1	pos	0.051216	7.0205	6.3184	7.0686	6.335	6.4609	6.5531	6.8036	6.5183	6.1408	7.001	6.7071	6.8172	7.2639	6.4673	6.3787	6.9929	6.5942	6.8224
TG(16:0/22:6/22:6)	TG(16:0/22:6/22:6)+H	GL	TG	triglyceride	(16:0/22:6/22:6)	951.744	1175.62	C63 H99 O6	pos	0.0901363	6.2171	6.2451	6.5258	5.6935	6.1368	5.8609	6.443	6.1656	5.7167	6.4982	6.28	6.3303	6.6247	6.0277	5.9514	6.3059	5.9209	6.2687
TG(16:0/6:0/16:0)	TG(16:0/6:0/16:0)+NH4	GL	TG	triglyceride	(16:0/6:0/16:0)	684.614	986.027	C41 H82 O6 N1	pos	0.00746427	6.5762	5.934	6.4734	5.9759	5.9487	6.3563	6.2124	6.3651	6.4567	6.5719	6.5412	6.465	6.9232	6.0147	6.2238	6.8494	6.4214	6.45
TG(16:0/6:0/18:1)	TG(16:0/6:0/18:1)+NH4	GL	TG	triglyceride	(16:0/6:0/18:1)	710.629	988.317	C43 H84 O6 N1	pos	0.01124	7.5025	6.6935	7.3159	7.0173	6.7579	7.2138	6.9815	6.9869	7.1036	7.3127	7.2355	7.1915	7.6964	6.9417	6.7758	7.608	7.1117	7.2317
TG(16:0/8:0/18:1)	TG(16:0/8:0/18:1)+NH4	GL	TG	triglyceride	(16:0/8:0/18:1)	738.661	1055.04	C45 H88 O6 N1	pos	0.00366558	8.2915	7.4191	8.0767	7.5125	7.6101	7.8165	7.6689	7.6893	7.5293	8.1071	7.929	8.0338	8.3729	7.4663	7.372	8.366	7.6601	7.9872
TG(16:0e/16:0/20:5)	TG(16:0e/16:0/20:5)+H	GL	TG	triglyceride	(16:0e/16:0/20:5)	839.749	1360.06	C55 H99 O5	pos	0.0454072	7.0938	7.2455	7.0222	7.282	6.9642	6.9956	7.4216	7.0697	7.4404	6.936	7.3495	6.9314	6.5317	7.4105	6.9616	6.8459	7.1755	7.0351
TG(16:0e/16:1/18:1)	TG(16:0e/16:1/18:1)+NH4	GL	TG	triglyceride	(16:0e/16:1/18:1)	834.791	1359.21	C53 H104 O5 N1	pos	0.0020057	7.5116	7.3872	7.3919	7.3261	7.1099	7.2811	7.853	7.3051	7.4893	7.4196	7.7351	7.3566	7.4439	7.552	6.9324	7.4125	7.4471	7.3983
TG(16:0e/20:5/22:2)	TG(16:0e/20:5/22:2)+H	GL	TG	triglyceride	(16:0e/20:5/22:2)	919.811	1060.54	C61 H107 O5	pos	0.0107112	7.8695	6.7327	7.4575	7.0617	6.9746	7.1643	7.9769	7.1505	6.8826	7.5914	7.458	7.4654	7.7073	7.0052	6.9855	7.7322	7.2606	7.3208
TG(16:1/10:0/18:1)	TG(16:1/10:0/18:1)+NH4	GL	TG	triglyceride	(16:1/10:0/18:1)	764.676	1062.54	C47 H90 O6 N1	pos	0.00693296	8.7157	7.673	8.5702	7.9315	8.0965	8.2224	8.0742	8.0204	8.0088	8.4893	8.4047	8.5006	8.8552	7.9916	7.8422	8.7543	8.1116	8.4553
TG(16:1/10:0/18:2)	TG(16:1/10:0/18:2)+NH4	GL	TG	triglyceride	(16:1/10:0/18:2)	762.661	995.412	C47 H88 O6 N1	pos	0.00591943	7.7449	7.1063	7.5717	7.0736	7.19	7.2188	7.2437	7.1613	7.1123	7.5024	7.3274	7.5386	7.9253	7.1596	7.0106	7.789	7.1436	7.5284
TG(16:1/14:0/18:1)	TG(16:1/14:0/18:1)+NH4	GL	TG	triglyceride	(16:1/14:0/18:1)	820.739	1209.21	C51 H98 O6 N1	pos	0.0288002	9.5903	8.9307	9.4507	8.9984	8.9286	9.2291	9.2313	9.216	8.9868	9.3837	9.3948	9.4288	9.79	8.8875	8.644	9.6594	9.069	9.4339
TG(16:1/14:0/19:0)	TG(16:1/14:0/19:0)+NH4	GL	TG	triglyceride	(16:1/14:0/19:0)	836.77	1209.23	C52 H102 O6 N1	pos	0.0420378	8.3089	7.7938	8.1581	7.8842	7.9842	8.1857	7.9573	8.1801	8.1358	8.1619	8.2305	8.2452	7.9189	7.9488	7.8779	8.3582	8.1933	8.1628
TG(16:1/14:1/18:2)	TG(16:1/14:1/18:2)+NH4	GL	TG	triglyceride	(16:1/14:1/18:2)	816.708	1080.14	C51 H94 O6 N1	pos	0.0786921	7.29	6.7954	7.1357	6.8996	6.9517	7.0307	7.385	7.1963	6.9613	7.1933	7.1228	7.1504	7.6694	6.8901	6.8855	7.492	6.8046	7.3636
TG(16:1/16:1/16:1)	TG(16:1/16:1/16:1)+NH4	GL	TG	triglyceride	(16:1/16:1/16:1)	818.723	1141.87	C51 H96 O6 N1	pos	0.0230048	8.6104	7.9262	8.5329	7.9756	8.108	8.2986	8.5927	8.2404	8.0095	8.4741	8.4308	8.512	8.9472	8.0062	7.9419	8.7001	8.0348	8.4526
TG(16:1/16:1/17:1)	TG(16:1/16:1/17:1)+NH4	GL	TG	triglyceride	(16:1/16:1/17:1)	832.739	1179.62	C52 H98 O6 N1	pos	0.0187265	7.236	6.952	7.2362	6.7563	6.8255	6.989	7.437	6.9669	6.8285	7.1293	7.1689	7.1702	7.5617	6.8089	6.7913	7.3762	6.8623	7.1442
TG(16:1/16:1/18:2)	TG(16:1/16:1/18:2)+NH4	GL	TG	triglyceride	(16:1/16:1/18:2)	844.739	1151.79	C53 H98 O6 N1	pos	0.201236	8.294	7.6932	8.677	7.7926	8.2815	8.0107	8.6233	8.258	8.1294	8.3541	8.3331	8.7187	8.7685	8.0425	8.0076	8.5248	7.9312	8.2484
TG(16:1/16:1/20:4)	TG(16:1/16:1/20:4)+Na	GL	TG	triglyceride	(16:1/16:1/20:4)	873.694	1128.26	C55 H94 O6 Na1	pos	0.172154	6.8415	6.5714	7.2114	6.11	6.598	6.6795	7.4829	6.6997	6.3413	6.9663	6.5551	6.8433	6.9179	6.7974	6.6098	6.7508	6.4076	6.9398
TG(18:4/6:0/10:0)	TG(18:4/6:0/10:0)+Na	GL	TG	triglyceride	(18:4/6:0/10:0)	625.444	808.097	C37 H62 O6 Na1	pos	0.0240591	8.2773	8.2944	8.1668	8.6249	8.5306	8.3873	7.9125	8.3976	8.5273	8.246	8.288	8.2508	7.8901	8.5522	8.8166	8.1795	8.4141	8.3465
TG(18:4/9:0/9:0)	TG(18:4/9:0/9:0)+H	GL	TG	triglyceride	(18:4/9:0/9:0)	631.493	877.064	C39 H67 O6	pos	0.0131418	7.8641	7.898	7.7013	7.8206	7.9285	7.7868	7.7226	7.8792	7.9572	7.844	7.8939	7.7917	7.4487	8.101	8.2016	7.7738	7.7902	7.9097
TG(19:0/10:0/18:1)	TG(19:0/10:0/18:1)+NH4	GL	TG	triglyceride	(19:0/10:0/18:1)	808.739	1132.28	C50 H98 O6 N1	pos	0.0166133	8.0607	7.3615	7.8385	7.5441	7.5954	7.7872	7.5981	7.7296	7.6019	7.9956	7.8812	7.9513	8.0904	7.5753	7.3729	8.1273	7.7329	7.8832
TG(19:0/12:4/22:2)	TG(19:0/12:4/22:2)+Na	GL	TG	triglyceride	(19:0/12:4/22:2)	887.71	1019.02	C56 H96 O6 Na1	pos	0.0242561	6.7738	6.0938	6.6943	6.3764	6.1732	6.5533	6.175	6.5815	6.3424	6.678	6.8112	6.7459	6.7273	6.3382	6.3297	6.9661	6.7626	6.5637
TG(19:0/13:0/23:0)	TG(19:0/13:0/23:0)+NH4	GL	TG	triglyceride	(19:0/13:0/23:0)	922.88	1582.8	C58 H116 O6 N1	pos	0.142804	8.3304	6.3247	8.4069	8.2693	6.3365	8.2351	7.781	8.0571	6.5511	9.1759	8.2934	8.3869	7.9007	8.1118	6.798	8.605	8.6739	8.0644
TG(19:0/14:0/14:0)	TG(19:0/14:0/14:0)+NH4	GL	TG	triglyceride	(19:0/14:0/14:0)	810.755	1208.61	C50 H100 O6 N1	pos	0.0167281	7.5523	7.0226	7.3991	7.0411	7.1431	7.4872	7.1798	7.57	7.8075	7.4728	7.5275	7.5952	7.4436	7.1335	7.1952	7.6538	7.5609	7.5024
TG(19:0/18:1/18:1)	TG(19:0/18:1/18:1)+NH4	GL	TG	triglyceride	(19:0/18:1/18:1)	918.848	1395.77	C58 H112 O6 N1	pos	0.0101855	8.41	7.7956	8.1754	7.5997	7.7588	7.9244	8.0396	7.8788	8.0332	8.1886	8.2246	8.197	8.2865	7.8528	7.7853	8.2584	8.0136	8.0654
TG(19:0/18:1/18:2)	TG(19:0/18:1/18:2)+NH4	GL	TG	triglyceride	(19:0/18:1/18:2)	916.833	1286.04	C58 H110 O6 N1	pos	0.0226286	8.9861	9.2206	9.1376	9.1076	9.1225	9.0042	9.0543	9.0832	9.1787	8.9844	9.1787	9.1613	8.2971	9.2149	9.2338	8.9038	9.079	9.0472
TG(19:0/18:1/19:0)	TG(19:0/18:1/19:0)+NH4	GL	TG	triglyceride	(19:0/18:1/19:0)	934.88	1376.22	C59 H116 O6 N1	pos	0.233701	7.8098	8.011	7.8542	8.1824	8.1026	7.8901	7.8474	7.782	8.2865	7.7517	7.8113	7.6902	7.4094	7.9543	8.1278	7.6268	8.061	7.8308
TG(19:0/18:2/18:2)	TG(19:0/18:2/18:2)+NH4	GL	TG	triglyceride	(19:0/18:2/18:2)	914.817	1266.02	C58 H108 O6 N1	pos	0.00333887	7.5413	7.6628	7.3842	6.9377	7.1528	7.2273	7.3962	7.2596	7.2341	7.5949	7.3084	7.4463	7.4622	7.1423	7.9268	7.5633	7.5908	7.4924
TG(19:0/18:3/18:3)	TG(19:0/18:3/18:3)+Na	GL	TG	triglyceride	(19:0/18:3/18:3)	915.741	1108.56	C58 H100 O6 Na1	pos	0.0163156	7.3995	6.7344	7.345	6.8633	6.9167	7.0866	7.3985	6.9744	7.1363	7.3149	7.388	7.391	7.3614	6.9291	6.9646	7.5804	7.3787	7.3242
TG(19:1/16:0/18:1)	TG(19:1/16:0/18:1)+NH4	GL	TG	triglyceride	(19:1/16:0/18:1)	890.817	1278.83	C56 H108 O6 N1	pos	0.0177493	8.708	8.8745	8.8097	8.9552	8.8525	8.7966	8.8245	8.7987	8.8051	8.6365	8.8416	8.7044	8.3546	8.8157	8.8473	8.6765	8.8855	8.7139
TG(19:1/16:1/18:1)	TG(19:1/16:1/18:1)+NH4	GL	TG	triglyceride	(19:1/16:1/18:1)	888.802	1216.86	C56 H106 O6 N1	pos	0.0403416	8.7323	8.2634	8.5041	8.2524	8.3464	8.4228	8.3656	8.6505	8.3099	8.5103	8.6192	8.677	8.3687	8.2976	8.2917	8.7432	8.2762	8.6179
TG(19:1/16:1/18:4)	TG(19:1/16:1/18:4)+Na	GL	TG	triglyceride	(19:1/16:1/18:4)	887.71	996.971	C56 H96 O6 Na1	pos	0.0137121	6.7342	5.8639	6.6375	6.2149	6.0805	6.4556	6.0781	6.4191	6.4449	6.5732	6.7804	6.6632	6.7425	6.2143	6.3209	6.9514	6.7216	6.6094
TG(19:1/18:1/18:1)	TG(19:1/18:1/18:1)+NH4	GL	TG	triglyceride	(19:1/18:1/18:1)	916.833	1355.23	C58 H110 O6 N1	pos	0.00276701	8.6783	8.1471	8.3676	7.9466	8.1578	8.1588	8.2778	8.12	8.0819	8.4357	8.4532	8.4415	8.5228	8.0989	8.0387	8.5297	8.2274	8.3611
TG(19:1/18:1/18:2)	TG(19:1/18:1/18:2)+NH4	GL	TG	triglyceride	(19:1/18:1/18:2)	914.817	1313.25	C58 H108 O6 N1	pos	0.0241186	8.1171	7.6009	7.9058	7.3444	7.6319	7.653	8.0553	7.6645	7.5493	8	7.9223	7.9959	8.1265	7.6678	7.5767	8.076	7.683	7.9286
TG(19:1/18:2/18:2)	TG(19:1/18:2/18:2)+NH4	GL	TG	triglyceride	(19:1/18:2/18:2)	912.802	1194.55	C58 H106 O6 N1	pos	0.0255424	7.301	6.9644	7.2288	6.6846	6.8904	6.9805	7.2645	6.9648	6.8461	7.4466	7.0623	7.1476	7.5098	6.9153	6.7744	7.3848	6.8173	7.2601
TG(19:1/18:2/20:5)	TG(19:1/18:2/20:5)+H	GL	TG	triglyceride	(19:1/18:2/20:5)	917.759	1261.11	C60 H101 O6	pos	0.0361581	6.8153	6.6259	6.8457	6.7882	6.503	6.7004	6.8608	6.7631	6.5376	6.8473	6.7253	6.941	6.7681	6.6352	6.7987	7.0251	6.6421	6.8687
TG(19:1/18:3/18:3)	TG(19:1/18:3/18:3)+Na	GL	TG	triglyceride	(19:1/18:3/18:3)	913.726	1060.66	C58 H98 O6 Na1	pos	0.0503408	7.4703	6.6684	7.2287	6.9329	6.9207	7.1039	7.0984	7.1251	6.9451	7.2798	7.2737	7.1909	7.217	6.9667	7.0309	7.5456	7.2051	7.1596
TG(20:0e/18:1/20:5)	TG(20:0e/18:1/20:5)+H	GL	TG	triglyceride	(20:0e/18:1/20:5)	921.827	1131.16	C61 H109 O5	pos	0.0821141	7.3092	6.1581	7.1574	6.5418	6.5043	6.9466	7.2411	6.8057	7.0933	7.2502	7.2504	7.0839	7.4186	6.8171	6.8012	7.6891	7.2708	7.1157
TG(20:1/18:1/18:1)	TG(20:1/18:1/18:1)+NH4	GL	TG	triglyceride	(20:1/18:1/18:1)	930.848	1286.18	C59 H112 O6 N1	pos	0.0356104	7.8456	7.9866	7.803	7.888	8.0358	7.8844	7.7653	7.9309	7.8997	7.8698	7.6893	7.8693	7.5906	7.9781	8.1492	7.7501	7.9204	7.7916
TG(20:1/18:1/20:1)	TG(20:1/18:1/20:1)+NH4	GL	TG	triglyceride	(20:1/18:1/20:1)	958.88	1410.73	C61 H116 O6 N1	pos	0.0183753	8.2516	7.615	7.8966	7.6912	7.7587	7.7153	7.9863	7.7023	7.9097	8.1643	8.1123	8.0104	8.2111	7.6415	7.5739	8.1293	7.688	8.0501
TG(20:1/18:1/20:2)	TG(20:1/18:1/20:2)+NH4	GL	TG	triglyceride	(20:1/18:1/20:2)	956.864	1376.22	C61 H114 O6 N1	pos	0.0617158	7.7234	7.5232	7.2797	7.084	7.668	7.1147	7.3707	7.2707	7.1492	7.6901	7.4466	7.7196	7.2989	7.4958	7.4756	7.4249	7.2359	7.5852
TG(20:1/18:1/22:4)	TG(20:1/18:1/22:4)+NH4	GL	TG	triglyceride	(20:1/18:1/22:4)	980.864	1355.11	C63 H114 O6 N1	pos	0.0294176	7.1777	6.9499	6.9378	6.6396	6.8824	6.7836	7.0836	6.7585	6.8135	7.4602	6.7586	7.0369	7.5027	6.98	6.7529	7.0929	6.6937	7.2065
TG(20:1/18:1/22:5)	TG(20:1/18:1/22:5)+NH4	GL	TG	triglyceride	(20:1/18:1/22:5)	978.848	1312.83	C63 H112 O6 N1	pos	0.0968445	7.1591	6.4787	6.5288	6.0107	6.2032	6.2602	6.9517	6.3146	6.3389	6.9178	6.5949	6.7529	7.0018	6.2237	6.0095	6.8162	6.2681	6.814
TG(20:1e/11:4/22:6)	TG(20:1e/11:4/22:6)+H	GL	TG	triglyceride	(20:1e/11:4/22:6)	841.67	1208	C56 H89 O5	pos	0.0468935	8.0146	8.1366	7.9682	8.1251	8.1663	8.0777	7.9764	8.1726	8.2353	7.8839	8.0026	7.9651	7.9015	8.1988	8.032	8.0673	8.1546	7.9667
TG(20:2e/18:4/19:0)	TG(20:2e/18:4/19:0)+Na	GL	TG	triglyceride	(20:2e/18:4/19:0)	929.793	1446.14	C60 H106 O5 Na1	pos	0.0196239	7.259	7.4443	7.3798	7.6439	7.4424	7.6815	7.4587	7.4539	7.9045	7.0667	7.4123	7.2406	6.8884	7.4027	7.7838	7.2159	7.5847	7.5271
TG(20:3e/14:4/19:1)	TG(20:3e/14:4/19:1)+Na	GL	TG	triglyceride	(20:3e/14:4/19:1)	869.699	1278.15	C56 H94 O5 Na1	pos	0.223783	8.0534	8.4115	8.0428	8.4293	8.4071	8.1849	8.0751	8.2714	8.2376	8.0399	8.0984	8.0468	7.5887	8.3413	8.4721	8.0074	8.25	8.1291
TG(20:4e/11:1/14:3)	TG(20:4e/11:1/14:3)+Na	GL	TG	triglyceride	(20:4e/11:1/14:3)	757.574	992.297	C48 H78 O5 Na1	pos	0.172627	7.2007	6.2756	7.095	6.3758	6.6613	6.5382	6.0162	6.7195	6.4382	6.9709	6.6906	6.8531	6.8497	6.4931	6.5328	6.9531	6.7372	6.8406
TG(20:4e/11:3/22:5)	TG(20:4e/11:3/22:5)+H	GL	TG	triglyceride	(20:4e/11:3/22:5)	839.655	1142.12	C56 H87 O5	pos	0.0508217	7.4474	7.3614	7.4688	7.356	7.5233	7.5985	7.5405	7.6067	7.4228	7.4204	7.4715	7.5506	7.514	7.4437	7.3225	7.616	7.4827	7.5088
TG(20:4e/14:4/19:1)	TG(20:4e/14:4/19:1)+Na	GL	TG	triglyceride	(20:4e/14:4/19:1)	867.684	1216.36	C56 H92 O5 Na1	pos	0.0798098	8.2044	8.3282	8.1418	8.152	8.1775	8.2237	7.8796	7.8284	8.2515	8.2713	8.3256	8.1911	7.9737	8.1632	8.3144	8.2231	8.3425	8.3434
TG(20:5/14:1/18:2)	TG(20:5/14:1/18:2)+H	GL	TG	triglyceride	(20:5/14:1/18:2)	847.681	1092.51	C55 H91 O6	pos	0.175252	6.8622	6.6843	6.9894	6.7628	6.7384	6.8453	7.6287	7.1829	6.5987	7.0535	6.9507	7.0815	7.5095	6.7216	6.7682	7.4	6.6741	7.057
TG(20:5/17:1/18:2)	TG(20:5/17:1/18:2)+H	GL	TG	triglyceride	(20:5/17:1/18:2)	889.728	1192.99	C58 H97 O6	pos	0.0333512	7.0783	6.8881	7.2248	6.5296	6.7663	7.135	7.1617	7.1801	6.7451	7.0999	7.0569	7.2111	7.3223	6.9825	7.0355	7.4019	7.0137	7.1277
TG(21:1)	TG(21:1)+H	GL	TG	triglyceride	(21:1)	427.305	130.363	C24 H43 O6	pos	0.0168349	7.1806	7.4618	7.131	7.4918	7.4937	7.1513	7.1339	7.3068	7.5271	7.2638	7.1623	7.0424	6.7374	7.462	7.6922	7.153	7.2442	7.2361
TG(22:0/11:2/24:1)	TG(22:0/11:2/24:1)+NH4	GL	TG	triglyceride	(22:0/11:2/24:1)	944.864	1338.25	C60 H114 O6 N1	pos	0.0699171	8.4407	8.5626	8.4353	8.6806	8.69	8.686	8.5618	8.464	8.7447	8.5478	8.4724	8.5715	8.2075	8.6359	8.7515	8.3809	8.7691	8.56
TG(22:0/11:3/24:1)	TG(22:0/11:3/24:1)+NH4	GL	TG	triglyceride	(22:0/11:3/24:1)	942.848	1289.95	C60 H112 O6 N1	pos	0.102717	8.6059	8.8225	8.6834	8.7587	8.8835	8.7176	8.7062	8.9146	8.7145	8.8594	8.8164	8.9007	8.5687	8.8179	8.8838	8.6917	8.7974	8.8325
TG(22:3/10:3/21:0)	TG(22:3/10:3/21:0)+Na	GL	TG	triglyceride	(22:3/10:3/21:0)	887.71	1068.2	C56 H96 O6 Na1	pos	0.0506135	6.9086	6.1537	6.868	6.5503	6.4019	6.9333	6.6002	6.6822	6.7393	6.8429	6.8879	6.8948	6.7885	6.4822	6.4891	7.0828	6.889	6.7926
TG(22:5/11:2/12:2)	TG(22:5/11:2/12:2)+NH4	GL	TG	triglyceride	(22:5/11:2/12:2)	764.582	713.515	C48 H78 O6 N1	pos	0.0197855	8.1147	8.2972	8.1684	8.8104	8.5651	8.1325	7.9898	8.1639	8.7805	8.2829	8.17	8.1569	7.7746	8.366	8.8427	8.0742	8.2521	8.3216
TG(23:1/12:1/12:1)	TG(23:1/12:1/12:1)+NH4	GL	TG	triglyceride	(23:1/12:1/12:1)	804.708	995.478	C50 H94 O6 N1	pos	0.021139	7.03	6.3156	6.8548	6.3923	6.4792	6.4797	6.4574	6.4353	6.3223	6.7879	6.6186	6.8159	7.1655	6.4654	6.2224	7.061	6.4375	6.83
TG(24:0/11:2/24:1)	TG(24:0/11:2/24:1)+NH4	GL	TG	triglyceride	(24:0/11:2/24:1)	972.895	1373.2	C62 H118 O6 N1	pos	0.0584979	7.9462	7.8405	7.7079	7.9324	8.0716	7.6565	7.5794	7.6508	7.8539	7.7807	7.7932	7.7056	7.4809	7.772	7.7958	7.7867	7.7041	7.8535
TG(24:0/12:1/23:1)	TG(24:0/12:1/23:1)+NH4	GL	TG	triglyceride	(24:0/12:1/23:1)	974.911	1411.24	C62 H120 O6 N1	pos	0.0211221	8.0055	7.7351	7.8323	7.9037	7.9157	7.5984	7.8147	7.7591	8.0669	7.8797	7.9895	7.9299	7.7375	7.8085	7.8746	7.8064	7.5617	7.8992
TG(24:1/11:2/24:1)	TG(24:1/11:2/24:1)+NH4	GL	TG	triglyceride	(24:1/11:2/24:1)	970.88	1357.79	C62 H116 O6 N1	pos	0.108984	7.4245	7.2356	7.389	7.188	7.7737	7.1911	7.4071	7.1887	7.6233	7.5563	7.3005	7.9385	7.3744	7.125	7.2678	7.5291	7.2748	7.4803
TG(24:1/11:2/24:2)	TG(24:1/11:2/24:2)+NH4	GL	TG	triglyceride	(24:1/11:2/24:2)	968.864	1309.7	C62 H114 O6 N1	pos	0.0529537	8.0085	7.6831	7.7957	7.5527	7.6535	7.5895	7.7555	7.5902	7.7694	8.0274	7.8276	7.8592	7.8387	7.7505	7.6162	7.8568	7.6386	7.9698
TG(24:1/11:3/22:1)	TG(24:1/11:3/22:1)+NH4	GL	TG	triglyceride	(24:1/11:3/22:1)	940.833	1229.52	C60 H110 O6 N1	pos	0.0282236	8.3813	8.2163	8.6203	8.0616	8.3827	8.3966	8.5938	8.451	8.164	8.4839	8.5233	8.5003	8.3408	8.3433	8.4562	8.5553	8.3234	8.5669
TG(24:1/11:3/24:1)	TG(24:1/11:3/24:1)+NH4	GL	TG	triglyceride	(24:1/11:3/24:1)	968.864	1294.51	C62 H114 O6 N1	pos	0.057238	7.6815	7.5833	7.5346	7.4529	7.5803	7.8067	7.6555	7.5993	7.5809	7.7772	7.6221	7.7694	7.4992	7.6179	7.6547	7.6398	7.5898	7.6246
TG(24:1/11:4/24:1)	TG(24:1/11:4/24:1)+NH4	GL	TG	triglyceride	(24:1/11:4/24:1)	966.848	1239.01	C62 H112 O6 N1	pos	0.185342	7.0077	6.7793	7.0863	6.9067	7.0581	7.0421	7.2354	7.2889	6.9607	7.3154	7.1417	7.0791	7.2251	7.2687	6.9957	7.1456	6.9405	7.025
TG(24:7)	TG(24:7)+NH4	GL	TG	triglyceride	(24:7)	474.285	92.2256	C27 H40 O6 N1	pos	0.00675527	8.56	8.9958	8.5253	9.0156	8.8289	8.5817	8.5374	8.6685	8.8986	8.6779	8.6566	8.704	8.2457	8.8018	9.1317	8.4304	8.7129	8.7831
TG(25:0/11:1/11:1)	TG(25:0/11:1/11:1)+NH4	GL	TG	triglyceride	(25:0/11:1/11:1)	806.723	1062.3	C50 H96 O6 N1	pos	0.0226435	8.0988	7.2752	7.9778	7.481	7.5498	7.6418	7.4192	7.5796	7.335	7.8913	7.737	7.9345	8.1542	7.3878	7.2148	8.0943	7.5005	7.8291
TG(25:1/16:0/16:0)	TG(25:1/16:0/16:0)+NH4	GL	TG	triglyceride	(25:1/16:0/16:0)	948.895	1414.13	C60 H118 O6 N1	pos	0.0163364	8.7157	8.4655	8.6216	8.6349	8.6145	8.4313	8.6375	8.6211	9.1153	8.6678	8.725	8.7558	8.4275	8.5417	8.7156	8.5853	7.8382	8.6433
TG(25:7)	TG(25:7)+NH4	GL	TG	triglyceride	(25:7)	488.301	87.0739	C28 H42 O6 N1	pos	0.0408085	7.8481	8.35	8.0016	8.4784	8.3447	7.9881	7.9113	7.8438	8.3351	8.0276	7.8734	7.8379	7.6238	8.2381	8.3965	7.8479	7.9691	7.9361
TG(27:0/12:4/20:3)	TG(27:0/12:4/20:3)+NH4	GL	TG	triglyceride	(27:0/12:4/20:3)	964.833	1204.5	C62 H110 O6 N1	pos	0.0543854	7.0909	6.6869	6.8543	6.5954	6.8619	6.9498	7.1131	6.8083	6.6203	7.1136	7.0064	6.9722	7.0044	6.9355	6.6912	6.9304	6.677	6.9594
TG(27:1/10:1/18:2)	TG(27:1/10:1/18:2)+NH4	GL	TG	triglyceride	(27:1/10:1/18:2)	914.817	1226.42	C58 H108 O6 N1	pos	0.0440138	8.8923	8.3515	8.8951	8.0666	8.5266	8.4737	8.7193	8.7628	8.3407	8.6011	8.6841	8.7154	8.7951	8.4447	8.5897	8.8219	8.6684	8.5907
TG(27:1/10:4/24:1)	TG(27:1/10:4/24:1)+NH4	GL	TG	triglyceride	(27:1/10:4/24:1)	994.88	1311.92	C64 H116 O6 N1	pos	0.0194045	7.5173	7.2826	7.2296	6.9803	7.1648	6.966	7.1864	6.9885	7.2527	7.5636	7.2298	7.401	7.3397	7.479	7.1276	7.3387	7.0728	7.4637
TG(28:1/10:0/18:1)	TG(28:1/10:0/18:1)+NH4	GL	TG	triglyceride	(28:1/10:0/18:1)	932.864	1278.83	C59 H114 O6 N1	pos	0.0315512	7.548	7.9294	7.6452	7.9763	7.9913	7.7282	7.7213	7.7214	7.7274	7.5764	7.6275	7.6039	7.1051	7.8189	7.9146	7.3658	7.8285	7.6867
TG(28:1/14:4/18:1)	TG(28:1/14:4/18:1)+NH4	GL	TG	triglyceride	(28:1/14:4/18:1)	980.864	1311.2	C63 H114 O6 N1	pos	0.0433758	7.0549	6.8672	6.8532	6.5346	6.9146	6.5491	6.795	6.5719	6.8681	7.2346	6.8823	7.2364	7.0538	7.072	6.6929	6.9953	6.6762	7.1111
TG(29:1/12:2/14:4)	TG(29:1/12:2/14:4)+Na	GL	TG	triglyceride	(29:1/12:2/14:4)	913.726	1041.09	C58 H98 O6 Na1	pos	0.0462403	7.3752	6.8365	7.3352	6.9813	7.054	6.9446	7.1427	7.0587	6.929	7.2359	7.1908	7.2201	7.2701	7.1355	6.9211	7.5386	7.3522	7.41
TG(30:1/11:3/16:1)	TG(30:1/11:3/16:1)+NH4	GL	TG	triglyceride	(30:1/11:3/16:1)	940.833	1266.99	C60 H110 O6 N1	pos	0.0665114	8.283	7.8986	8.0601	7.6909	7.9244	7.8993	7.868	7.8682	7.7864	8.3507	8.0093	8.1119	8.1537	7.9242	7.7327	8.2062	7.8085	8.2174
TG(30:1/11:4/18:1)	TG(30:1/11:4/18:1)+NH4	GL	TG	triglyceride	(30:1/11:4/18:1)	966.848	1266.64	C62 H112 O6 N1	pos	0.00535092	8.0772	7.702	7.8377	7.5163	7.722	7.6177	7.6364	7.5978	7.5088	8.1038	7.7492	7.9138	8.0783	7.7142	7.5001	7.9652	7.6219	7.9773
TG(30:1/12:4/17:0)	TG(30:1/12:4/17:0)+NH4	GL	TG	triglyceride	(30:1/12:4/17:0)	968.864	1324.58	C62 H114 O6 N1	pos	0.0255122	7.8504	7.497	7.7582	7.4537	7.5221	7.7926	7.5929	7.5839	7.7373	7.9326	7.7163	7.7986	7.7891	7.591	7.5644	7.8622	7.5028	7.7362
TG(30:1/8:0/11:1)	TG(30:1/8:0/11:1)+NH4	GL	TG	triglyceride	(30:1/8:0/11:1)	834.755	1134.68	C52 H100 O6 N1	pos	0.032266	8.5102	7.7549	8.191	7.905	8.0018	8.1036	7.9298	8.0071	7.8954	8.3411	8.2088	8.3411	8.429	7.9925	7.7116	8.4587	8.0414	8.3019
TG(34:3e)	TG(34:3e)+H	GL	TG	triglyceride	(34:3e)	591.498	812.631	C37 H67 O5	pos	0.0747654	8.16	8.0783	8.0222	8.2367	8.0827	8.1573	8.1238	8.2895	8.2258	8.0284	8.2064	8.0852	7.8141	8.4008	8.4618	8.0384	8.1419	8.2633
TG(37:10e)	TG(37:10e)+Na	GL	TG	triglyceride	(37:10e)	641.418	808.032	C40 H58 O5 Na1	pos	0.0241012	7.4693	7.5235	7.4333	7.92	7.7826	7.6033	7.0339	7.6228	7.7373	7.5155	7.5352	7.5055	7.1282	7.7558	8.0111	7.3769	7.6846	7.5608
TG(39:3e)	TG(39:3e)+NH4	GL	TG	triglyceride	(39:3e)	678.603	818.481	C42 H80 O5 N1	pos	0.010858	6.4842	6.8497	6.7425	6.8816	6.7923	6.8087	6.8857	6.8488	6.6433	6.5596	6.7504	6.7175	6.3842	6.7562	6.5217	6.3527	6.7902	6.6551
TG(4:0/11:0/12:3)	TG(4:0/11:0/12:3)+H	GL	TG	triglyceride	(4:0/11:0/12:3)	507.368	387.369	C30 H51 O6	pos	0.0528737	5.4397	5.8936	6.2491	6.0502	6.3507	5.9418	7.2342	5.785	6.214	5.4263	5.4281	5.601	4.9253	5.6223	6.145	5.7773	5.8689	5.5927
TG(4:0/11:2/12:0)	TG(4:0/11:2/12:0)+NH4	GL	TG	triglyceride	(4:0/11:2/12:0)	526.41	198.29	C30 H56 O6 N1	pos	0.0100671	6.7741	7.0026	6.8363	7.1089	7.0722	6.7521	6.6799	6.804	7.1788	6.8401	6.7732	6.7466	6.5324	7.0081	7.3529	6.737	6.768	6.8871
TG(4:0/11:4/17:0)	TG(4:0/11:4/17:0)+H	GL	TG	triglyceride	(4:0/11:4/17:0)	575.431	744.086	C35 H59 O6	pos	0.041057	8.3312	8.3418	8.1941	8.5096	8.5525	8.4519	8.2088	8.4278	8.6224	8.3433	8.3525	8.3235	7.9473	8.5952	8.6993	8.2435	8.3431	8.4318
TG(4:0/16:0/18:1)	TG(4:0/16:0/18:1)+NH4	GL	TG	triglyceride	(4:0/16:0/18:1)	682.598	924.799	C41 H80 O6 N1	pos	0.0191261	6.5148	5.9849	6.2598	6.6355	6.0787	6.2929	6.1989	6.2762	6.0512	6.3413	6.5514	6.232	6.7288	6.0061	6.0679	6.568	6.2953	6.2688
TG(4:0/16:1/18:1)	TG(4:0/16:1/18:1)+NH4	GL	TG	triglyceride	(4:0/16:1/18:1)	680.582	863.911	C41 H78 O6 N1	pos	0.0193018	6.4216	6.0136	6.5564	7.1653	5.8319	6.6108	5.9628	5.9177	6.2433	6.5397	6.3552	6.004	6.3193	5.8467	6.697	6.2373	6.6121	6.8114
TG(4:0/18:1/18:1)	TG(4:0/18:1/18:1)+NH4	GL	TG	triglyceride	(4:0/18:1/18:1)	708.614	929.424	C43 H82 O6 N1	pos	0.0177874	6.7371	5.7966	6.3374	6.4093	6.1099	6.3664	6.3055	6.2291	6.0625	6.5946	6.4495	6.4284	6.7786	6.0362	6.0737	6.7356	6.3747	6.5001
TG(4:0/8:0/10:1)	TG(4:0/8:0/10:1)+NH4	GL	TG	triglyceride	(4:0/8:0/10:1)	458.348	154.228	C25 H48 O6 N1	pos	0.0116938	6.5302	6.7044	6.9385	6.9664	6.9766	6.5897	7.0465	6.7901	6.9506	6.5954	6.6552	6.8149	6.1784	6.8409	6.9822	6.4944	6.8027	6.4874
TG(41:9)	TG(41:9)+NH4	GL	TG	triglyceride	(41:9)	708.52	713.396	C44 H70 O6 N1	pos	0.0182105	8.4193	8.6021	8.5061	8.9243	8.787	8.5028	8.3427	8.5676	8.8268	8.5153	8.4641	8.4195	8.0262	8.6238	9.0868	8.364	8.6295	8.5867
TG(42:9e)	TG(42:9e)+Na	GL	TG	triglyceride	(42:9e)	713.511	276.382	C45 H70 O5 Na1	pos	0.0475376	6.1118	6.1916	6.1308	6.4228	6.2828	6.0211	7.0184	6.2459	6.3321	6.1406	6.0024	5.8817	5.2555	6.5142	6.4134	6.18	5.9573	6.0054
TG(43:1)	TG(43:1)+NH4	GL	TG	triglyceride	(43:1)	752.676	988.883	C46 H90 O6 N1	pos	0.0536187	6.9572	5.974	6.7952	5.9618	5.9977	6.4202	6.2505	6.4577	6.0543	6.6495	6.5632	6.7304	6.9614	5.9993	6	6.8995	6.41	6.4841
TG(43:4e)	TG(43:4e)+NH4	GL	TG	triglyceride	(43:4e)	732.65	897.656	C46 H86 O5 N1	pos	0.0597633	6.2905	6.615	6.2977	6.8569	6.6998	6.4623	6.123	6.5318	6.8867	6.6556	6.4576	6.4317	6.1577	6.5204	6.985	6.3333	6.6617	6.4237
TG(44:6e)	TG(44:6e)+NH4	GL	TG	triglyceride	(44:6e)	742.634	390.599	C47 H84 O5 N1	pos	0.0152771	6.6175	6.6352	6.6095	6.8067	6.8964	6.4679	6.6988	6.7247	6.6582	6.4162	6.5391	6.164	5.6699	6.7059	6.7115	6.6179	6.5101	6.2766
TG(45:0)	TG(45:0)+NH4	GL	TG	triglyceride	(45:0)	782.723	1130.73	C48 H96 O6 N1	pos	0.0119248	7.1661	6.6501	7.0708	6.7828	6.7932	7.0611	6.8746	7.0784	7.217	7.2215	7.1856	7.2937	7.2827	6.7041	6.6851	7.3456	7.1023	7.2292
TG(45:2)	TG(45:2)+NH4	GL	TG	triglyceride	(45:2)	778.692	993.179	C48 H92 O6 N1	pos	0.114824	7.1364	6.0589	6.8344	6.2379	6.364	6.6184	6.4731	6.3722	6.3291	6.7556	6.6115	6.8009	7.0652	6.3407	6.2288	7.2036	6.4671	6.7788
TG(45:7e)	TG(45:7e)+Na	GL	TG	triglyceride	(45:7e)	759.59	1054.13	C48 H80 O5 Na1	pos	0.0254391	7.1219	6.5757	7.0721	6.7489	6.8951	7.0339	6.3143	6.9968	6.7977	6.926	6.9629	7.0598	6.8659	6.7655	6.6811	7.077	6.9857	7.0499
TG(45:8)	TG(45:8)+Na	GL	TG	triglyceride	(45:8)	771.553	768.393	C48 H76 O6 Na1	pos	0.286084	6.5418	7.1177	6.8595	6.1793	7.0023	6.1207	6.9286	6.0046	6.7623	6.9717	5.9828	6.9925	5.7381	6.0687	5.8946	6.5162	6.9637	6.9984
TG(47:7e)	TG(47:7e)+Na	GL	TG	triglyceride	(47:7e)	787.621	1132.03	C50 H84 O5 Na1	pos	0.0285692	7.6875	7.2842	7.449	7.3847	7.4197	7.6675	7.1716	7.6218	7.5531	7.3999	7.4659	7.6348	7.4465	7.4202	7.4135	7.5811	7.5931	7.4814
TG(48:9)	TG(48:9)+H	GL	TG	triglyceride	(48:9)	789.603	928.138	C51 H81 O6	pos	0.0270962	6.6276	6.2136	6.7296	6.4089	6.6441	6.4973	6.4934	6.5826	7.0991	6.5808	6.6765	6.7219	6.3135	6.3603	6.8484	6.9215	6.7553	6.72
TG(53:9e)	TG(53:9e)+Na	GL	TG	triglyceride	(53:9e)	867.684	1235.74	C56 H92 O5 Na1	pos	0.051258	7.2747	6.4486	7.2885	7.4214	7.6199	7.3426	7.2849	7.3816	7.5161	6.52	7.2572	7.2858	7.0481	7.2752	7.4338	7.3495	7.3568	7.3054
TG(54:3)	TG(54:3)+NH4	GL	TG	triglyceride	(54:3)	902.817	1142.98	C57 H108 O6 N1	pos	0.050051	6.6376	6.3148	6.5864	6.148	6.367	6.4292	6.747	6.2765	7.0271	6.4693	6.2545	6.5594	6.7964	6.26	5.7911	7.3611	7.3114	6.5518
TG(55:0)	TG(55:0)+NH4	GL	TG	triglyceride	(55:0)	922.88	1628.76	C58 H116 O6 N1	pos	0.138689	8.1076	6.1238	8.4667	7.9331	6.1888	7.7687	7.4348	7.8067	6.4644	8.5595	7.9476	8.3886	8.1992	7.9023	6.7491	8.6165	8.2464	8.1046
TG(55:1)	TG(55:1)+NH4	GL	TG	triglyceride	(55:1)	920.864	1699.46	C58 H114 O6 N1	pos	0.0389859	7.2035	6.1962	7.5367	6.7942	5.7788	7.0121	6.476	6.6021	6.7009	7.6277	7.0555	7.4542	7.455	7.213	6.509	7.1424	7.0398	6.9386
TG(55:3)	TG(55:3)+NH4	GL	TG	triglyceride	(55:3)	916.833	1253.87	C58 H110 O6 N1	pos	0.037583	7.8136	7.3867	7.6064	7.2859	7.6466	7.4314	7.4769	7.433	7.3433	7.737	7.6014	7.6375	7.7709	7.3012	7.4181	7.8077	7.4051	7.6566
TG(56:4e)	TG(56:4e)+Na	GL	TG	triglyceride	(56:4e)	919.809	1123.61	C59 H108 O5 Na1	pos	0.00537645	7.7307	6.5567	7.3051	7.039	6.5999	7.2411	7.2163	7.103	6.8609	7.3058	7.2526	7.1225	7.8495	7.0172	6.8732	7.5747	7.0432	7.0236
TG(57:10e)	TG(57:10e)+Na	GL	TG	triglyceride	(57:10e)	921.731	1323.36	C60 H98 O5 Na1	pos	0.0983675	7.6003	7.2737	7.5665	7.1907	7.5391	7.2816	7.5742	7.3412	7.8288	7.5283	7.3294	7.4346	7.1901	7.2801	7.4231	7.5505	7.2949	7.3936
TG(57:6)	TG(57:6)+NH4	GL	TG	triglyceride	(57:6)	938.817	1203.05	C60 H108 O6 N1	pos	0.0289973	7.2913	7.3747	7.1775	6.7149	7.083	7.4183	7.7266	7.4379	7.0047	7.3035	7.1202	7.2102	7.2715	7.0971	7.2828	7.5528	6.8599	7.2364
TG(57:7)	TG(57:7)+NH4	GL	TG	triglyceride	(57:7)	936.802	1105.73	C60 H106 O6 N1	pos	0.0341164	6.5575	6.1283	6.9514	5.9811	6.2979	6.4309	7.504	6.7264	6.1952	6.6632	6.7523	6.9098	7.2368	6.5157	6.7509	7.0837	6.4454	6.5818
TG(58:12e)	TG(58:12e)+NH4	GL	TG	triglyceride	(58:12e)	926.76	1374.83	C61 H100 O5 N1	pos	0.0125704	7.5247	7.8326	7.412	8.1138	7.8519	7.5235	7.4547	7.5866	7.973	7.3862	7.3679	7.5203	7.0179	7.8432	7.9813	7.3969	7.6081	7.6327
TG(59:10)	TG(59:10)+H	GL	TG	triglyceride	(59:10)	941.759	1109.36	C62 H101 O6	pos	0.0324821	7.2377	6.6802	7.03	6.6372	6.7898	6.7279	6.6451	6.6764	6.6362	7.1848	7.01	7.4731	7.1061	6.8909	6.609	7.2858	7.0842	7.4388
TG(59:8e)	TG(59:8e)+H	GL	TG	triglyceride	(59:8e)	931.811	1058.19	C62 H107 O5	pos	0.080733	6.7568	6.0883	6.684	6.7549	6.1553	6.4219	6.8978	6.3592	6.3906	6.697	6.6179	6.4368	6.8076	6.321	6.3449	6.6992	6.3387	6.2774
TG(6:0/12:0/12:3)	TG(6:0/12:0/12:3)+H	GL	TG	triglyceride	(6:0/12:0/12:3)	549.415	397.259	C33 H57 O6	pos	0.0273499	6.0615	6.3709	6.586	6.5977	6.6001	6.2228	6.5977	6.2477	6.8452	6.4109	6.0942	6.3372	5.8329	6.4958	6.7077	6.0041	6.263	6.1573
TG(6:0/18:1/18:1)	TG(6:0/18:1/18:1)+NH4	GL	TG	triglyceride	(6:0/18:1/18:1)	736.645	992.756	C45 H86 O6 N1	pos	0.0677004	7.8084	6.8736	7.7415	6.9682	7.1221	7.3264	7.1814	7.0852	7.0175	7.4882	7.3182	7.6596	7.8658	7.2325	6.9856	7.9167	7.1378	7.4757
TG(6:0/18:1/18:2)	TG(6:0/18:1/18:2)+NH4	GL	TG	triglyceride	(6:0/18:1/18:2)	734.629	929.335	C45 H84 O6 N1	pos	0.044308	6.7393	5.9725	6.4136	5.9222	6.1814	6.1737	6.3708	6.089	5.8805	6.4808	6.2893	6.5039	6.8463	6.1313	5.8701	6.7582	6.1034	6.5424
TG(60:7)	TG(60:7)+NH4	GL	TG	triglyceride	(60:7)	978.848	1263.84	C63 H112 O6 N1	pos	0.020177	6.944	6.6126	6.7481	6.3295	6.6288	6.3515	6.5525	6.3538	6.3929	7.059	6.6489	6.8457	6.8927	6.4328	6.5888	6.9097	6.383	6.8788
TG(8:0/18:2/18:2)	TG(8:0/18:2/18:2)+NH4	GL	TG	triglyceride	(8:0/18:2/18:2)	760.645	932.463	C47 H86 O6 N1	pos	0.0172994	6.542	5.7618	6.3732	5.7634	5.9152	6.5193	6.1999	6.0829	6.5246	6.1105	6.1599	6.4244	6.7799	6.4517	5.914	6.6214	5.8903	6.381
TG(8:0/18:2/20:5)	TG(8:0/18:2/20:5)+H	GL	TG	triglyceride	(8:0/18:2/20:5)	765.603	932.46	C49 H81 O6	pos	0.0287092	6.3316	6.0524	5.8849	6.0948	6.281	5.8695	5.6585	5.7091	6.2333	6.0165	5.9777	6.206	6.5688	5.6326	6.1382	6.4397	5.7225	6.0263
TG(9:0/18:1/20:4)	TG(9:0/18:1/20:4)+H	GL	TG	triglyceride	(9:0/18:1/20:4)	783.65	1096.89	C50 H87 O6	pos	0.0100998	6.9965	6.5488	6.8155	6.2329	6.5578	6.5944	6.3838	6.4659	6.3712	6.6874	6.6746	6.7531	6.8738	6.4863	6.6464	6.8794	6.5744	6.7291
TG(18:1e/18:2/18:2)	TG(18:1e/18:2/18:2)+H	GL	TG	triglyceride	(18:1e/18:2/18:2)	867.78	1395.41	C57 H103 O5	pos	0.109865	6.866	7.434	7.2333	7.3846	7.1701	8.1682	7.6192	6.9731	7.3938	6.8514	7.1072	7.788	8.0182	7.5037	7.0931	8.1943	8.4324	6.9462
TG(18:1e/18:4/19:1)	TG(18:1e/18:4/19:1)+Na	GL	TG	triglyceride	(18:1e/18:4/19:1)	901.762	1486.34	C58 H102 O5 Na1	pos	0.112276	7.958	5.9137	7.6336	7.3664	5.5369	8.266	7.1398	7.8396	6.4057	7.6778	7.7742	7.8893	7.2866	7.0219	6.2636	7.8068	8.0491	7.7358
TG(18:2/14:1/18:2)	TG(18:2/14:1/18:2)+NH4	GL	TG	triglyceride	(18:2/14:1/18:2)	842.723	1092.27	C53 H96 O6 N1	pos	0.0846199	7.5005	7.0113	7.2315	6.6707	7.0146	6.9824	8.0315	6.9914	6.67	7.2527	7.0496	7.3376	7.6903	6.8006	7.0539	7.4511	6.8145	7.1225
TG(18:2/17:1/18:2)	TG(18:2/17:1/18:2)+NH4	GL	TG	triglyceride	(18:2/17:1/18:2)	884.77	1193.36	C56 H102 O6 N1	pos	0.00917876	7.4675	7.1051	7.5788	6.7914	7.0168	7.2184	7.636	7.2604	7.0005	7.4605	7.3224	7.4955	7.7892	7.202	7.196	7.7347	7.1429	7.4866
TG(18:2/18:2/18:2)	TG(18:2/18:2/18:2)+NH4	GL	TG	triglyceride	(18:2/18:2/18:2)	896.77	1164.6	C57 H102 O6 N1	pos	0.158689	8.6714	8.1077	8.5689	8.0447	8.2253	8.3611	9.368	8.5762	8.1797	8.6486	8.7249	8.6458	8.8737	8.3198	8.4982	8.9595	8.3636	8.6306
TG(18:2e/16:0/18:1)	TG(18:2e/16:0/18:1)+NH4	GL	TG	triglyceride	(18:2e/16:0/18:1)	860.807	1357.87	C55 H106 O5 N1	pos	0.00977073	7.4731	7.2607	7.2955	7.2889	7.0355	7.1951	7.8774	7.1992	7.3044	7.3987	7.656	7.2825	7.3961	7.4168	6.8841	7.3828	7.453	7.2841
TG(18:3/18:2/18:2)	TG(18:3/18:2/18:2)+NH4	GL	TG	triglyceride	(18:3/18:2/18:2)	894.755	1105.47	C57 H100 O6 N1	pos	0.0915565	7.277	7.0818	7.67	6.9293	7.0639	7.1507	8.2923	7.4093	7.0311	7.344	7.4285	7.5912	7.9697	7.2945	7.4639	7.8038	7.2112	7.331
TG(18:3/18:3/21:0)	TG(18:3/18:3/21:0)+NH4	GL	TG	triglyceride	(18:3/18:3/21:0)	938.817	1164.88	C60 H108 O6 N1	pos	0.0188866	7.8102	7.2946	7.6658	7.2587	7.4441	7.5459	8.2508	7.7248	7.2027	7.8658	7.8284	7.9262	7.8942	7.5419	7.6871	8.0981	7.5933	7.5555
TG(18:3e/10:4/21:1)	TG(18:3e/10:4/21:1)+Na	GL	TG	triglyceride	(18:3e/10:4/21:1)	813.637	1134.46	C52 H86 O5 Na1	pos	0.0387733	8.151	7.7718	7.904	7.9102	7.9917	8.0411	7.6708	8.0461	7.9496	7.982	7.9327	8.0507	7.9558	8.0058	7.824	8.0839	8.0653	7.9857
TG(18:3e/17:0/20:5)	TG(18:3e/17:0/20:5)+Na	GL	TG	triglyceride	(18:3e/17:0/20:5)	897.731	1365.36	C58 H98 O5 Na1	pos	0.0331466	7.6573	7.4249	7.5995	7.9099	7.3978	7.5901	7.52	7.6241	7.714	7.6304	7.7115	7.7028	7.5284	7.5492	8.016	7.7487	8.068	7.6459
TG(18:3e/17:1/20:4)	TG(18:3e/17:1/20:4)+Na	GL	TG	triglyceride	(18:3e/17:1/20:4)	897.731	1337.82	C58 H98 O5 Na1	pos	0.0533736	8.2403	8.6199	8.209	8.4659	8.6969	8.2759	8.2514	8.3115	8.9518	8.2011	8.253	8.1698	7.7837	8.6268	8.6573	8.0767	8.3925	8.2002
TG(18:3e/18:1/18:3)	TG(18:3e/18:1/18:3)+Na	GL	TG	triglyceride	(18:3e/18:1/18:3)	885.731	1357.33	C57 H98 O5 Na1	pos	0.0205794	7.4706	7.4486	7.5472	7.3811	7.3321	7.4806	7.3962	7.5622	7.9301	7.3571	7.6387	7.5171	7.2478	7.3821	7.5655	7.4983	7.6506	7.4528
TG(18:3e/18:2/22:3)	TG(18:3e/18:2/22:3)+H	GL	TG	triglyceride	(18:3e/18:2/22:3)	917.796	1021.7	C61 H105 O5	pos	0.0187911	7.5387	6.5716	7.1931	6.9032	6.7002	7.0404	8.0008	6.9591	6.6603	7.4317	7.289	7.1621	7.6732	6.949	6.8721	7.6161	7.0912	7.0372
TG(18:3e/18:3/19:0)	TG(18:3e/18:3/19:0)+Na	GL	TG	triglyceride	(18:3e/18:3/19:0)	901.762	1454.83	C58 H102 O5 Na1	pos	0.0405776	7.9192	6.1842	7.9341	7.5925	6.0056	8.3033	7.4593	7.6151	7.1301	7.8478	7.9216	7.8113	7.5711	7.1643	6.4346	8.4283	8.1697	8.1622
TG(18:3e/18:4/19:0)	TG(18:3e/18:4/19:0)+Na	GL	TG	triglyceride	(18:3e/18:4/19:0)	899.746	1380.14	C58 H100 O5 Na1	pos	0.0301404	8.1044	8.5455	8.3608	8.7124	8.5862	8.3882	8.3633	8.4725	8.9804	8.4792	8.5518	8.0202	7.7582	8.4944	8.8079	8.4729	8.6081	8.5241
TG(18:3e/20:5/20:5)	TG(18:3e/20:5/20:5)+H	GL	TG	triglyceride	(18:3e/20:5/20:5)	907.717	1255.61	C61 H95 O5	pos	0.0241989	7.3354	7.3056	7.3342	6.9482	7.1776	7.3119	7.3119	7.3555	7.191	7.21	7.2971	7.3926	7.1741	7.3254	7.3464	7.4193	7.2832	7.3298
TG(18:3e/8:0/10:0)	TG(18:3e/8:0/10:0)+H	GL	TG	triglyceride	(18:3e/8:0/10:0)	619.53	768.928	C39 H71 O5	pos	0.0252545	6.7108	6.7675	6.8719	6.815	6.7496	6.8608	7.7684	6.7584	6.6146	6.8591	6.845	6.8193	6.557	6.7469	6.6279	6.4771	6.6642	6.6578
TG(18:4/11:2/24:0)	TG(18:4/11:2/24:0)+Na	GL	TG	triglyceride	(18:4/11:2/24:0)	887.71	1038.22	C56 H96 O6 Na1	pos	0.0488485	6.9039	6.2547	6.955	6.4552	6.441	6.5132	6.6031	6.6923	6.5332	6.8416	6.9238	6.7987	6.8843	6.6394	6.5088	7.064	6.885	6.9
TG(18:4/18:0/18:0)	TG(18:4/18:0/18:0)+H	GL	TG	triglyceride	(18:4/18:0/18:0)	883.775	1378.97	C57 H103 O6	pos	0.0138932	8.9843	9.1171	9.0297	9.3469	9.1704	9.1662	8.9737	9.1548	9.6343	9.1339	9.0659	9.1748	8.5669	9.1762	9.4158	8.7387	9.2177	9.1064
TG(18:4/18:4/19:0)	TG(18:4/18:4/19:0)+Na	GL	TG	triglyceride	(18:4/18:4/19:0)	911.71	1020.71	C58 H96 O6 Na1	pos	0.0610312	7.3345	6.4242	7.1587	6.853	6.592	7.0224	7.3704	6.9805	6.5966	7.2072	7.2349	7.0802	7.3767	6.9479	6.8906	7.433	7.035	6.8955
WE(2:0/18:2)	WE(2:0/18:2)+NH4	FA	WE	wax esters	(2:0/18:2)	326.305	184.457	H40 C20 O2 N1	pos	0.138377	6.4058	6.7097	6.2953	6.9629	6.7176	6.2607	5.9844	6.5906	6.6857	6.8904	6.5895	6.607	6.3493	6.5088	6.8625	6.1174	6.3961	6.5684
WE(2:0/18:3)	WE(2:0/18:3)+NH4	FA	WE	wax esters	(2:0/18:3)	324.29	146.316	H38 C20 O2 N1	pos	0.0891623	6.796	7.1208	6.7523	7.239	7.0736	6.9202	6.9797	6.79	7.0578	7.0698	6.9521	7.0416	6.6403	7.0565	7.3959	6.7328	6.9648	7.0189
WE(2:0/20:2)	WE(2:0/20:2)+NH4	FA	WE	wax esters	(2:0/20:2)	354.337	250.174	H44 C22 O2 N1	pos	0.00622736	6.8279	7.0832	7.0316	7.4018	7.3279	7.1049	7.1746	7.0387	7.3413	6.9513	6.9155	7.0264	6.4553	7.3385	7.5559	6.9032	6.9617	7.0786
WE(2:0/22:3)	WE(2:0/22:3)+NH4	FA	WE	wax esters	(2:0/22:3)	380.352	374.799	H46 C24 O2 N1	pos	0.0290948	6.6425	6.8611	6.7563	6.8833	6.7342	6.5727	6.4903	6.4897	6.5283	6.6531	6.6553	6.6799	6.2757	6.4935	6.6326	5.8979	6.6728	6.5661
WE(2:0/24:3)	WE(2:0/24:3)+NH4	FA	WE	wax esters	(2:0/24:3)	408.384	470.137	H50 C26 O2 N1	pos	0.0528985	6.6072	6.9922	6.8602	7.0317	6.9522	6.7005	6.6013	6.5569	6.7478	6.9461	6.806	6.8518	6.3368	6.5293	6.809	5.8368	6.9573	6.6427
WE(2:0/25:3)	WE(2:0/25:3)+NH4	FA	WE	wax esters	(2:0/25:3)	422.399	512.944	H52 C27 O2 N1	pos	0.0166379	6.5198	7.1457	6.5033	7.3877	7.1297	6.5949	6.3685	6.5025	7.1154	7.1394	6.4717	7.0411	6.0839	6.6486	7.407	6.3629	7.1687	6.6283
WE(14:0/16:3)	WE(14:0/16:3)+NH4	FA	WE	wax esters	(14:0/16:3)	464.446	568.384	H58 C30 O2 N1	pos	0.0203295	6.8759	7.2667	6.9039	7.5202	7.2101	6.9638	6.9447	6.9875	7.3215	7.1949	6.9861	7.1112	6.5858	7.2068	7.4635	6.7517	7.1997	6.9938
WE(18:4/23:6)	WE(18:4/23:6)+NH4	FA	WE	wax esters	(18:4/23:6)	604.509	785.013	H66 C41 O2 N1	pos	0.0276838	6.3034	6.5487	5.9822	6.413	6.1278	6.4707	6.3743	6.4279	6.2653	6.3163	6.2995	6.3106	5.8241	6.4774	6.0026	6.0631	6.367	6.4753
WE(2:0/14:2)	WE(2:0/14:2)+NH4	FA	WE	wax esters	(2:0/14:2)	270.243	103.895	H32 C16 O2 N1	pos	0.0922837	6.7873	7.1865	7.1483	7.2901	7.3481	7.0227	6.9955	7.0074	7.6223	7.0438	6.9576	6.9125	6.6156	7.0948	7.5567	6.8101	6.9783	6.9815
WE(2:0/16:2)	WE(2:0/16:2)+H	FA	WE	wax esters	(2:0/16:2)	281.248	1.7337	H33 C18 O2	pos	0.0386624	7.2592	7.7162	6.5055	7.8389	7.3885	6.469	6.4919	6.4982	7.6611	6.3167	6.344	6.9606	5.928	7.3802	6.8563	6.9082	7.2036	6.1477
WE(2:0/16:3)	WE(2:0/16:3)+NH4	FA	WE	wax esters	(2:0/16:3)	296.258	98.0071	H34 C18 O2 N1	pos	0.02387	6.7497	7.7434	7.3452	7.8051	7.8607	7.2601	7.0582	7.3879	7.6928	7.409	7.2846	7.4898	6.8544	7.5381	7.3981	7.2934	7.3742	7.1194
WE(2:0/16:4)	WE(2:0/16:4)+NH4	FA	WE	wax esters	(2:0/16:4)	294.243	84.1526	H32 C18 O2 N1	pos	0.0412872	6.6789	5.4894	6.6401	7.588	7.2447	6.9502	7.0214	6.7353	7.2754	7.2853	7.0184	6.8437	7.0077	7.1047	7.5533	6.9325	6.9407	7.1992
WE(8:0/18:3)	WE(8:0/18:3)+NH4	FA	WE	wax esters	(8:0/18:3)	408.384	426.23	H50 C26 O2 N1	pos	0.0252189	6.4497	6.7357	6.6248	6.9429	6.9537	6.4495	6.3126	6.3586	6.5885	6.7077	6.5277	6.6046	6.1203	6.2789	6.6419	5.8305	6.7583	6.3871
WE(8:0/19:3)	WE(8:0/19:3)+NH4	FA	WE	wax esters	(8:0/19:3)	422.399	471.63	H52 C27 O2 N1	pos	0.024786	6.7485	7.2364	6.6949	7.5346	7.2986	6.7186	6.6686	6.6789	7.2342	7.3772	6.7706	7.1918	6.353	6.8043	7.5788	6.4756	7.3229	6.8702
WE(23:1/21:3)	WE(23:1/21:3)+NH4	FA	WE	wax esters	(23:1/21:3)	658.65	1137.16	H84 C44 O2 N1	pos	0.0401181	6.2171	6.7008	6.527	6.5256	7.0439	6.7267	6.402	6.5856	6.7715	7.0583	6.8474	6.4231	6.2278	7.2105	6.9676	6.6255	6.352	6.8417
WE(2:0/23:3)	WE(2:0/23:3)+NH4	FA	WE	wax esters	(2:0/23:3)	394.368	423.199	H48 C25 O2 N1	pos	0.0193158	6.3973	6.9073	6.3874	7.0964	6.9464	6.4127	6.2247	6.3125	6.7973	7.0544	6.3551	6.826	5.969	6.4359	7.0197	6.1526	6.9581	6.4782
WE(47:10)	WE(47:10)+NH4	FA	WE	wax esters	(47:10)	688.603	982.955	H78 C47 O2 N1	pos	0.0398581	6.7808	7.1378	6.8187	6.8626	7.0128	6.902	7.0691	6.9131	6.8616	6.9725	6.9686	6.8911	6.4236	7.1002	6.9197	6.5364	6.9234	6.972
WE(5:0/16:4)	WE(5:0/16:4)+H	FA	WE	wax esters	(5:0/16:4)	319.263	1.6634	H35 C21 O2	pos	0.231632	5.821	6.6638	5.8349	6.8794	6.4384	5.8535	5.7846	6.4129	6.9526	6.2437	6.3456	5.665	5.2158	5.9367	6.1482	5.8724	6.2776	5.1927
WE(6:0/16:3)	WE(6:0/16:3)+NH4	FA	WE	wax esters	(6:0/16:3)	352.321	189.433	H42 C22 O2 N1	pos	0.00778351	6.8556	7.2459	7.116	7.4192	7.4135	7.2669	7.5483	7.0544	7.4533	7.2013	7.0816	7.091	6.6546	7.6536	7.6112	6.9848	7.0294	7.1632
WE(24:5/14:1)	WE(24:5/14:1)+NH4	FA	WE	wax esters	(24:5/14:1)	570.524	908.459	H68 C38 O2 N1	pos	0.0313202	6.5251	6.6279	6.285	6.7539	6.446	6.4497	6.1538	6.6564	6.4722	6.2345	6.646	6.2757	5.7079	6.5151	6.2713	6.4788	6.3692	6.3179
WE(8:0/16:3)	WE(8:0/16:3)+NH4	FA	WE	wax esters	(8:0/16:3)	380.352	321.956	H46 C24 O2 N1	pos	0.0192978	6.3251	6.5337	6.4137	6.6123	6.4272	6.2024	6.1615	6.1407	6.2027	6.2526	6.2823	6.3015	6.0104	6.1043	6.396	5.5618	6.369	6.196
ZyE(33:6)	ZyE(33:6)+NH4	ST	ZyE	Zymosterol Ester	(33:6)	866.775	997.269	C60 H100 O2 N1	pos	0.00352735	7.3081	6.4008	7.1884	6.7008	6.5613	6.9078	7.3687	6.8914	6.853	7.1488	7.2581	7.171	7.528	6.6716	6.7019	7.5259	7.1693	7.1041
ZyE(35:6)	ZyE(35:6)+NH4	ST	ZyE	Zymosterol Ester	(35:6)	894.806	1020.15	C62 H104 O2 N1	pos	0.0129135	7.3084	6.2623	7.0366	6.5987	6.4711	6.7686	6.8631	6.7255	6.5451	7.1294	7.174	7.0148	7.4835	6.5827	6.6316	7.433	7.0251	7.0308
ZyE(38:6)	ZyE(38:6)+NH4	ST	ZyE	Zymosterol Ester	(38:6)	936.853	1108.35	C65 H110 O2 N1	pos	0.106935	7.2645	6.7896	7.576	6.6559	6.7152	6.9175	6.8825	6.821	6.8238	7.2067	7.2884	7.2812	7.5455	6.7351	6.6724	7.5997	7.3199	7.4133
Cer(d18:1/24:0)	Cer(d18:1/24:0)+HCOO	SP	Cer	Ceramides	(d18:1/24:0)	694.635	982.609	C43 H84 O5 N1	neg	0.00728412	7.684	7.5505	7.5996	7.4955	7.7043	7.4863	8.3048	7.5044	7.5427	7.7656	7.7017	7.4903	7.6267	7.6675	7.496	7.6352	7.6115	7.6536
Cer(d18:1/20:0)	Cer(d18:1/20:0)+HCOO	SP	Cer	Ceramides	(d18:1/20:0)	638.573	833.755	C39 H76 O5 N1	neg	0.00728506	6.8321	6.6914	6.7961	6.6691	6.9211	6.531	7.8071	6.6941	6.7999	7.122	6.8167	6.5647	6.9057	6.8424	6.6796	6.901	6.8365	6.8243
Cer(d18:1/22:0)	Cer(d18:1/22:0)+HCOO	SP	Cer	Ceramides	(d18:1/22:0)	666.604	905.827	C41 H80 O5 N1	neg	0.00729564	7.3589	7.213	7.3007	7.2121	7.3271	7.1249	8.1825	7.1884	7.2424	7.5179	7.2141	7.2167	7.3892	7.3316	7.1388	7.3614	7.2983	7.3438
Cer(d18:1/23:0)	Cer(d18:1/23:0)+HCOO	SP	Cer	Ceramides	(d18:1/23:0)	680.62	944.101	C42 H82 O5 N1	neg	0.0224031	7.0386	6.9199	7.0442	6.8923	7.046	6.8583	7.5096	6.9214	6.9365	7.1949	6.9339	6.8216	6.897	7.0634	6.8958	7.0752	7.0122	7.0581
Cer(d18:2/22:0)	Cer(d18:2/22:0)+HCOO	SP	Cer	Ceramides	(d18:2/22:0)	664.588	841.365	C41 H78 O5 N1	neg	0.00902312	6.1077	5.9458	6.0551	5.9438	6.1022	5.8217	6.351	5.9184	6.056	6.433	6.0387	5.9025	6.1965	6.2141	5.9078	6.2771	6.0808	6.1034
Cer(d18:2/24:0)	Cer(d18:2/24:0)+HCOO	SP	Cer	Ceramides	(d18:2/24:0)	692.62	914.809	C43 H82 O5 N1	neg	0.00837869	6.615	6.4816	6.4673	6.4461	6.5433	6.3426	6.3925	6.3586	6.5332	6.7436	6.4292	6.358	6.5426	6.5887	6.373	6.6637	6.5046	6.5353
Cer(d18:1/25:0)	Cer(d18:1/25:0)+HCOO	SP	Cer	Ceramides	(d18:1/25:0)	708.651	1021.35	C44 H86 O5 N1	neg	0.00703452	6.2993	6.1502	6.2222	6.0666	6.3417	6.1938	6.5743	6.1476	6.2372	6.4417	6.4234	6.0216	6.0914	6.34	6.4357	6.3221	6.2318	6.341
Cer(d18:2/18:0)	Cer(d18:2/18:0)+HCOO	SP	Cer	Ceramides	(d18:2/18:0)	608.526	711.342	C37 H70 O5 N1	neg	0.00725177	7.0999	6.8872	7.0241	7.0711	6.9373	6.9165	7.0608	6.9963	7.2286	7.1553	7.1365	7.2415	7.0895	7.1074	7.1911	7.2276	6.9651	7.1227
Cer(d42:1)	Cer(d42:1+O)+HCOO	SP	Cer	Ceramides	(d42:1)	710.63	860.91	C43 H84 O6 N1	neg	0.0194378	6.1365	6.0618	6.0507	5.9386	6.1688	5.7974	6.3222	5.9884	6.3482	6.3942	5.8163	5.8179	5.9819	6.1345	6.3433	6.2658	6.065	6.0952
Cer(d43:2)	Cer(d43:2)+HCOO	SP	Cer	Ceramides	(d43:2)	706.635	936.461	C44 H84 O5 N1	neg	0.00873809	5.9343	6.0021	5.7825	5.6336	5.8579	5.6663	6.4324	5.6341	5.6988	5.9854	5.5637	5.7506	5.8998	5.8785	5.6075	5.8371	5.6998	5.7622
Cer(d44:1)	Cer(d44:1+O)+HCOO	SP	Cer	Ceramides	(d44:1)	738.662	1022.58	C45 H88 O6 N1	neg	0.0315347	5.6243	5.5274	5.6618	5.7522	5.8076	5.5382	5.8064	5.5091	6.0233	5.9713	5.7253	5.4562	5.5553	5.5686	6.2414	5.9991	5.6788	5.4988
Cer(d46:0)	Cer(d46:0+O)+HCOO	SP	Cer	Ceramides	(d46:0)	768.709	1092.69	C47 H94 O6 N1	neg	0.00693841	6.1024	6.0254	6.0758	6.128	6.1512	6.0418	5.9895	6.0193	6.3933	6.0704	6.1099	5.9648	5.9638	6.1831	6.5455	6.2978	6.0224	6.0473
Cer(d48:0)	Cer(d48:0+O)+HCOO	SP	Cer	Ceramides	(d48:0)	796.74	1169.74	C49 H98 O6 N1	neg	0.0380676	5.8723	5.8201	5.8644	5.9229	5.967	5.7915	5.7959	5.7782	6.1683	5.8769	5.8715	5.6857	5.7845	5.8747	6.3765	6.0351	5.7999	5.882
Cer(m21:1/15:0)	Cer(m21:1/15:0+O)+HCOO	SP	Cer	Ceramides	(m21:1/15:0)	610.542	766.365	C37 H72 O5 N1	neg	0.0106996	8.4041	8.2988	8.3785	8.3284	8.3246	8.216	8.4917	8.2968	8.3437	8.4312	8.252	8.3407	8.3108	8.3475	8.2954	8.3096	8.2838	8.5047
Cer(d18:1/24:2)	Cer(d18:1/24:2)+HCOO	SP	Cer	Ceramides	(d18:1/24:2)	690.604	837.495	C43 H80 O5 N1	neg	0.0109164	6.8116	6.743	6.7059	6.6593	6.71	6.4403	7.9246	6.5478	6.6875	7.0127	6.6127	6.5776	6.8987	6.6075	6.5084	6.848	6.6055	6.7205
Cer(m40:0)	Cer(m40:0+O)+HCOO	SP	Cer	Ceramides	(m40:0)	668.62	932.839	C41 H82 O5 N1	neg	0.0121324	6.0233	5.812	5.9186	6.0159	6.0341	5.7136	6.69	6.0021	5.8737	6.4081	5.8485	5.7262	6.0299	6.1172	5.8121	6.0371	6.0223	5.8763
Cer(m44:0)	Cer(m44:0+O)+HCOO	SP	Cer	Ceramides	(m44:0)	724.682	1089.2	C45 H90 O5 N1	neg	0.0112605	5.7894	5.6488	5.7344	5.802	5.8274	5.7435	5.9746	5.6827	6.0037	5.9606	5.7075	5.6534	5.6582	5.7726	6.2302	5.9644	5.7644	5.7698
Cer(m46:0)	Cer(m46:0+O)+HCOO	SP	Cer	Ceramides	(m46:0)	752.714	1166.49	C47 H94 O5 N1	neg	0.0102241	5.7118	5.6094	5.677	5.6423	5.7473	5.7312	5.7094	5.6831	6.0498	5.798	5.709	5.5796	5.5699	5.783	6.2065	5.9517	5.6926	5.6849
Cer(t17:0/25:0)	Cer(t17:0/25:0)+HCOO	SP	Cer	Ceramides	(t17:0/25:0)	712.646	938.918	C43 H86 O6 N1	neg	0.0211963	6.114	5.9619	6.0897	6.0027	6.1842	5.8227	6.3953	6.0037	6.354	6.2217	5.8828	5.9688	5.9112	6.1076	6.2487	6.1896	6.0924	6.1366
Cer(t18:0/24:0)	Cer(t18:0/24:0+O)+HCOO	SP	Cer	Ceramides	(t18:0/24:0)	728.641	909.505	C43 H86 O7 N1	neg	0.0499711	5.9803	5.8981	5.9918	5.9441	6.0875	5.7458	6.2396	5.8731	6.3061	6.1033	5.6624	5.868	5.859	5.9243	6.1965	6.0753	5.9719	5.8719
Cer(t18:0/26:0)	Cer(t18:0/26:0)+HCOO	SP	Cer	Ceramides	(t18:0/26:0)	740.677	1015.75	C45 H90 O6 N1	neg	0.0271901	5.9209	5.8561	6.0231	5.9327	6.0844	5.9031	6.0076	5.868	6.2227	6.0864	5.977	5.7071	5.6725	5.9797	6.4737	6.161	5.9307	5.8234
Cer(t18:1/24:0)	Cer(t18:1/24:0+O)+HCOO	SP	Cer	Ceramides	(t18:1/24:0)	726.625	827.485	C43 H84 O7 N1	neg	0.0264	6.1029	5.9609	6.1949	6.1526	6.1571	5.7934	6.2454	6.0072	6.3912	6.41	5.8906	5.8363	5.969	6.1512	6.188	6.2572	6.0996	6.0949
Cer(t20:1/24:0)	Cer(t20:1/24:0+O)+HCOO	SP	Cer	Ceramides	(t20:1/24:0)	754.657	897.693	C45 H88 O7 N1	neg	0.0292531	6.2387	6.1272	6.2719	6.2707	6.2606	5.9916	6.1172	6.1489	6.5385	6.4393	5.9808	6.0097	6.2128	6.3039	6.6109	6.469	6.2124	6.2041
Cer(t38:0)	Cer(t38:0)+HCOO	SP	Cer	Ceramides	(t38:0)	656.583	801.498	C39 H78 O6 N1	neg	0.020893	5.7703	5.7584	5.9492	5.6225	5.8213	5.6663	5.8509	5.8537	5.5467	5.958	5.7361	5.4387	5.5901	5.8272	5.3029	5.7811	5.8305	5.874
Cer(t43:1)	Cer(t43:1+O)+HCOO	SP	Cer	Ceramides	(t43:1)	740.641	862.703	C44 H86 O7 N1	neg	0.0206565	5.8874	5.8449	5.9477	6.0038	6.0259	5.6322	5.9394	5.802	6.2609	6.1251	5.6027	5.5228	5.7337	6.0108	6.1331	6.1428	5.9142	5.7744
Cer(t44:0)	Cer(t44:0+O)+HCOO	SP	Cer	Ceramides	(t44:0)	756.672	984.645	C45 H90 O7 N1	neg	0.0239209	5.9164	5.7818	5.9627	5.9747	5.9598	5.696	5.8385	5.7791	6.2417	5.9481	5.888	5.6912	5.7955	5.9407	6.2137	6.0719	5.8385	5.882
Cer(t45:0)	Cer(t45:0)+HCOO	SP	Cer	Ceramides	(t45:0)	754.693	1054.59	C46 H92 O6 N1	neg	0.0104343	5.7309	5.6327	5.7353	5.8276	5.9028	5.7324	5.7498	5.6624	6.0135	5.8265	5.7919	5.6969	5.5392	5.7696	6.3474	5.9866	5.7419	5.7348
Cer(t46:0)	Cer(t46:0+O)+HCOO	SP	Cer	Ceramides	(t46:0)	784.704	1061.13	C47 H94 O7 N1	neg	0.00716863	5.8885	5.8806	5.9557	5.91	6.0659	5.8466	5.905	5.8217	6.2667	5.9384	5.8958	5.7006	5.7407	5.9493	6.5072	6.1023	5.8979	5.9238
Cer(t46:1)	Cer(t46:1)+HCOO	SP	Cer	Ceramides	(t46:1)	766.693	1011.26	C47 H92 O6 N1	neg	0.00734101	5.8143	5.82	5.9022	5.8298	5.8922	5.7438	5.8641	5.6645	6.1639	5.9685	5.7985	5.6201	5.7193	5.7979	6.2962	6.0549	5.7719	5.7499
Cer(t46:1+O)	Cer(t46:1+O)+HCOO	SP	Cer	Ceramides	(t46:1)	782.688	969.65	C47 H92 O7 N1	neg	0.00767391	5.9195	5.8361	5.9861	5.9378	5.9875	5.7366	5.8442	5.8555	6.2474	6.0423	5.7723	5.7358	5.6586	5.9255	6.3601	6.0553	5.8708	5.8142
Cer(d23:0/19:0)	Cer(d23:0/19:0)+HCOO	SP	Cer	Ceramides	(d23:0/19:0)	696.651	1010.26	C43 H86 O5 N1	neg	0.00692363	6.1946	5.9643	6.0723	6.1259	6.2547	6.0332	6.6479	6.1649	6.1181	6.458	6.2827	5.9487	6.1175	6.2462	6.2731	6.1722	6.1526	6.0383
Cer(d19:0/25:1)	Cer(d19:0/25:1)+HCOO	SP	Cer	Ceramides	(d19:0/25:1)	722.667	1061.09	C45 H88 O5 N1	neg	0.0125244	5.867	5.7358	5.8807	5.7818	6.0119	5.7975	6.3967	5.7391	6.0477	6.1948	5.9782	5.7605	5.7906	5.9616	6.3307	5.9524	5.8571	5.8221
Cer(m36:0)	Cer(m36:0+O)+HCOO	SP	Cer	Ceramides	(m36:0)	612.557	789.706	C37 H74 O5 N1	neg	0.0163076	6.5569	6.3393	6.5745	6.585	6.5212	5.6249	6.7107	6.7978	6.2861	6.6617	6.5467	5.6194	6.5834	6.6874	6.215	6.4259	6.6468	6.524
CerG2GNAc1(t31:2)	CerG2GNAc1(t31:2)-H	SoG1	CerG2GNAc1	Simple Glc series	(t31:2)	1035.62	814.517	C51 H91 O19 N2	neg	0.00717683	6.4555	6.4925	6.4231	6.4883	6.5605	5.8936	6.5654	6.4705	6.4559	6.6202	6.0227	6.0384	6.2597	6.5394	6.0245	6.5612	6.5079	6.4752
CerG2GNAc1(m30:0)	CerG2GNAc1(m30:0)-H	SoG1	CerG2GNAc1	Simple Glc series	(m30:0)	993.648	809.806	C50 H93 O17 N2	neg	0.00706217	6.8807	6.9572	6.7756	6.8722	6.9236	6.379	6.877	6.8437	6.8455	7.0637	6.4656	6.5698	6.6757	6.8365	6.5124	6.8831	6.8312	6.833
CerP(t41:2)	CerP(t41:2)-H	SP	CerP	Ceramides phosphate	(t41:2)	728.56	982.708	C41 H79 O7 N1 P1	neg	0.0644725	5.8641	5.8449	5.8556	5.8005	6.0071	5.7148	6.2466	5.8095	5.7794	6.042	6.0196	5.6762	5.8281	5.9724	5.6159	5.9633	5.8776	5.9082
CL(20:2/18:2/18:2/18:2)	CL(20:2/18:2/18:2/18:2)-H	GP	CL	Cardiolipin	(20:2/18:2/18:2/18:2)	1476	1095.41	C83 H145 O17 P2	neg	0.0137948	6.3818	6.739	6.8421	6.8814	6.6053	6.4467	6.4104	6.5003	6.3509	6.9193	6.8006	6.6001	6.5375	6.5363	6.2895	6.5227	6.7663	6.7726
CL(22:6/22:2/20:0/18:0)	CL(22:6/22:2/20:0/18:0)-H	GP	CL	Cardiolipin	(22:6/22:2/20:0/18:0)	1588.12	625.913	C91 H161 O17 P2	neg	0.0405657	6.5781	6.926	6.7226	6.4086	6.6273	6.6661	7.0617	6.5717	6.5239	6.7683	6.7107	6.414	6.7642	6.4803	6.358	6.4741	6.6122	6.6718
CL(77:6)	CL(77:6)-2H	GP	CL	Cardiolipin	(77:6)	760.534	692.866	C86 H154 O17 P2	neg	0.100003	6.1599	6.117	6.2158	5.9854	6.2016	6.4109	5.9583	6.3537	6.0685	5.9545	6.3685	6.0042	6.1372	5.7266	5.1306	6.1982	6.4183	6.2325
CL(85:14)	CL(85:14)-2H	GP	CL	Cardiolipin	(85:14)	808.534	603.543	C94 H154 O17 P2	neg	0.00683323	7.2788	7.0779	7.2778	7.3174	7.2107	7.091	7.112	7.1748	7.3068	7.1588	7.2437	7.0793	7.1217	7.3657	7.4604	7.0719	7.1908	7.2124
CL(85:5)	CL(85:5)-2H	GP	CL	Cardiolipin	(85:5)	817.604	687.419	C94 H172 O17 P2	neg	0.00894841	6.8597	6.8601	6.7644	6.6869	6.8884	6.9103	6.7119	6.7681	6.8588	6.7321	6.8507	6.6947	6.7328	6.9025	6.93	6.8504	6.8464	6.7506
CL(76:11)	CL(76:11)-H	GP	CL	Cardiolipin	(76:11)	1497.98	1096.55	C85 H143 O17 P2	neg	0.0507907	6.0524	5.9802	6.0442	6.2813	5.9284	5.8458	5.9264	5.7341	5.281	6.4238	6.1883	5.791	6.1038	5.9194	4.7987	5.6411	6.0791	5.9863
CL(89:3)	CL(89:3)-2H	GP	CL	Cardiolipin	(89:3)	847.651	809.407	C98 H184 O17 P2	neg	0.00768701	6.4223	6.5169	6.3835	6.4512	6.4615	6.042	6.5502	6.3885	6.2896	6.6481	6.1594	6.2302	6.308	6.4149	6.0548	6.4537	6.3659	6.3704
CL(18:2/18:2/18:2/16:1)	CL(18:2/18:2_18:2_16:1)-H	GP	CL	Cardiolipin	(18:2/18:2_18:2_16:1)	1421.95	1030.51	C79 H139 O17 P2	neg	0.0367037	5.9504	6.3578	6.0151	6.0787	6.1324	6.3469	6.3023	5.9829	5.2865	6.274	6.0819	5.8861	6.049	5.8267	4.6889	5.881	6.094	6.0372
CL(10:3/16:1/14:1/16:1)	CL(10:3/16:1_14:1_16:1)-H	GP	CL	Cardiolipin	(10:3/16:1_14:1_16:1)	1227.75	596.591	C65 H113 O17 P2	neg	0.0152157	6.4984	6.4108	6.4553	6.5209	6.465	6.4411	6.295	6.4603	6.746	6.5097	6.58	6.49	6.6301	6.607	7.0352	6.6413	6.437	6.6239
CL(87:1)	CL(87:1)-2H	GP	CL	Cardiolipin	(87:1)	835.651	848.382	C96 H184 O17 P2	neg	0.0424069	5.737	5.8686	5.8649	5.6589	5.8115	5.315	6.0218	5.8339	5.2717	5.9031	5.3976	5.1189	5.4757	5.8068	5.518	5.7954	5.8369	5.7517
DGDG(28:1e)	DGDG(28:1e)-H	SoG1	DGDG	Digalactosyldiacylglycerol	(28:1e)	819.548	651.336	C43 H79 O14	neg	0.0239519	6.7992	6.6098	6.5816	6.8906	6.7792	6.6533	6.6765	6.6277	7.1425	6.6538	6.7232	6.6784	6.5069	6.9231	7.379	7.0781	6.6952	6.7315
GD1a(m38:2)	GD1a(m38:2)-2H	SP	GD1a	Gangliosides	(m38:2)	922.489	801.977	C86 H148 O38 N4	neg	0.00689927	6.1732	6.104	6.0474	6.1856	6.1589	5.6653	6.0591	6.1945	6.2211	6.1341	5.6962	5.2154	5.6772	6.2218	5.5688	6.2016	6.2769	6.1422
GM2(d34:5)	GM2(d34:5)-2H	SP	GM2	Gangliosides	(d34:5)	672.858	1836.34	C65 H107 O26 N3	neg	0.0075658	7.0126	6.9037	6.9388	7.0968	7.1382	6.9211	6.8933	6.921	7.3905	6.9041	6.9934	6.908	6.9488	7.0303	7.5198	7.2311	6.9547	6.9765
GM3(d33:5)	GM3(d33:5)-H	SP	GM3	Gangliosides	(d33:5)	1129.63	809.378	C56 H93 O21 N2	neg	0.00216499	6.2639	6.2883	6.122	6.3122	6.2875	5.6043	6.1483	6.2211	6.3746	6.2667	5.6734	5.7709	5.8039	6.1976	5.7643	6.2695	6.2536	6.2668
GM3(t43:6)	GM3(t43:6)-2H	SP	GM3	Gangliosides	(t43:6)	641.378	177.666	C66 H110 O22 N2	neg	0.00916162	6.9233	6.8214	6.9636	6.9973	6.8133	6.7813	6.8236	6.8523	7.0043	6.8177	6.9621	7.0718	7.0004	7.0719	7.3071	6.8116	6.9041	6.8834
LPC(16:0)	LPC(16:0)+HCOO	GP	LPC	lysophosphatidylcholine	(16:0)	540.331	169.329	C25 H51 O9 N1 P1	neg	0.00980304	7.1242	7.2362	7.3134	7.3163	7.2319	7.4323	8.5184	7.1889	7.6387	7.4319	7.3886	7.6394	7.5256	7.2754	7.58	7.4783	7.2224	7.1942
LPC(16:0e)	LPC(16:0e)+HCOO	GP	LPC	lysophosphatidylcholine	(16:0e)	526.351	200.826	C25 H53 O8 N1 P1	neg	0.0117426	6.9855	6.9218	7.0255	6.8109	6.9601	7.1902	7.8728	6.8889	7.3081	7.1525	7.0385	7.3019	7.3376	7.3477	7.2923	7.1898	6.875	6.7559
LPC(18:0)	LPC(18:0)+HCOO	GP	LPC	lysophosphatidylcholine	(18:0)	568.362	224.196	C27 H55 O9 N1 P1	neg	0.0229198	4.5481	4.8845	4.8616	4.781	5.1156	5.0269	7.1261	4.8076	5.1607	5.2584	5.3746	5.4514	5.4652	5.0355	4.7136	5.3042	5.0317	4.8874
LPC(18:0e)	LPC(18:0e)+HCOO	GP	LPC	lysophosphatidylcholine	(18:0e)	554.383	293.438	C27 H57 O8 N1 P1	neg	0.00754399	5.7656	5.8315	5.8988	5.5382	6.0233	6.1154	7.3632	5.8898	6.167	6.1065	6.0447	6.3277	6.2287	6.2232	6.092	6.099	5.8935	5.6718
LPC(18:1)	LPC(18:1)+HCOO	GP	LPC	lysophosphatidylcholine	(18:1)	566.346	180.431	C27 H53 O9 N1 P1	neg	0.0181419	6.0843	6.3073	6.1974	6.2459	6.3169	6.5398	7.4324	6.2244	6.532	6.595	6.3628	6.8083	6.6222	6.2026	6.6843	6.4193	6.3281	6.2494
LPC(16:1e)	LPC(16:1e)+HCOO	GP	LPC	lysophosphatidylcholine	(16:1e)	524.336	191.791	C25 H51 O8 N1 P1	neg	0.0189794	6.6369	6.7276	6.7502	6.5042	6.5512	6.9244	7.0554	6.6389	7.051	6.7061	6.7318	7.0977	7.1668	6.9921	6.8401	6.8901	6.3469	6.5745
LPC(18:2)	LPC(18:2)+HCOO	GP	LPC	lysophosphatidylcholine	(18:2)	564.331	133.919	C27 H51 O9 N1 P1	neg	0.00795803	7.199	7.4492	7.4663	7.3634	7.9055	7.5122	7.5442	7.3108	7.6033	7.9287	7.5895	7.6906	7.6277	7.448	7.5457	7.5353	7.7931	7.4007
LPC(18:2e)	LPC(18:2e)+HCOO	GP	LPC	lysophosphatidylcholine	(18:2e)	550.351	202.397	C27 H53 O8 N1 P1	neg	0.0182149	5.8337	5.9961	5.857	5.4062	5.7758	6.2535	6.2913	5.8658	6.2629	6.0168	5.977	6.4126	6.4672	6.2321	5.856	6.0271	5.5184	5.7774
LPC(20:4)	LPC(20:4)+HCOO	GP	LPC	lysophosphatidylcholine	(20:4)	588.331	129.963	C29 H51 O9 N1 P1	neg	0.00698556	6.0454	6.4922	6.2953	6.2477	7.1591	6.2075	6.4614	5.9404	6.5107	7.4024	6.3427	6.5672	6.4586	6.2675	6.4262	6.284	6.85	6.4611
LPC(18:1e)	LPC(18:1e)+HCOO	GP	LPC	lysophosphatidylcholine	(18:1e)	552.367	210.562	C27 H55 O8 N1 P1	neg	0.00842563	6.3625	6.4246	6.319	6.0613	6.4408	6.651	7.2332	6.2982	6.759	6.6325	6.5056	6.8268	6.8071	6.6895	6.5505	6.5703	6.2485	6.1549
LPE(16:0)	LPE(16:0)-H	GP	LPE	lysophosphatidylethanolamine	(16:0)	452.278	178.721	C21 H43 O7 N1 P1	neg	0.00995886	5.4335	5.8494	6.2945	5.8523	5.9758	6.0089	7.8909	5.8288	6.185	6.3033	6.0804	6.2437	6.1941	5.9226	6.0689	6.0269	5.9644	5.7333
LPE(16:0e)	LPE(16:0e)-H	GP	LPE	lysophosphatidylethanolamine	(16:0e)	438.299	213.74	C21 H45 O6 N1 P1	neg	0.0076812	6.1017	6.1507	6.2838	5.9641	5.9284	6.122	7.0397	6.1091	6.4529	6.2362	6.1693	6.4522	6.391	6.3187	6.3191	6.3415	5.8677	5.8884
LPE(18:0)	LPE(18:0)-H	GP	LPE	lysophosphatidylethanolamine	(18:0)	480.31	239.447	C23 H47 O7 N1 P1	neg	0.00816076	4.4758	3.9859	4.0897	4.6416	4.2349	4.1302	7.4373	4.0447	4.4893	5.1479	4.2046	4.9353	4.2016	4.355	5.3869	4.3187	4.1243	4.0712
LPE(18:0e)	LPE(18:0e)-H	GP	LPE	lysophosphatidylethanolamine	(18:0e)	466.33	312.673	C23 H49 O6 N1 P1	neg	0.00721313	5.5283	5.8246	5.8983	5.2485	5.5154	5.7984	7.1715	5.6091	5.8457	5.8354	5.8043	5.9942	6.003	5.8693	5.6423	5.9467	5.5425	5.3724
LPE(18:1)	LPE(18:1)-H	GP	LPE	lysophosphatidylethanolamine	(18:1)	478.294	189.626	C23 H45 O7 N1 P1	neg	0.017477	5.6316	6.0791	6.0348	6.0052	6.2638	6.1643	7.587	5.842	6.1887	6.6122	6.1274	6.4888	6.4203	5.9927	6.155	6.2156	6.1556	5.8698
LPE(16:1e)	LPE(16:1e)-H	GP	LPE	lysophosphatidylethanolamine	(16:1e)	436.283	205.288	C21 H43 O6 N1 P1	neg	0.0078445	7.1794	7.1747	7.3304	7.1578	7.0219	7.5394	8.1369	7.2419	7.5087	7.1568	7.3073	7.6134	7.6578	7.4585	7.4554	7.4054	6.9204	7.0598
LPE(18:2)	LPE(18:2)-H	GP	LPE	lysophosphatidylethanolamine	(18:2)	476.278	140.685	C23 H43 O7 N1 P1	neg	0.00762934	6.8704	7.0481	7.2215	7.2565	7.7533	7.1358	7.2495	6.8985	7.3555	7.8298	7.0876	7.2354	7.105	7.0692	7.3124	7.1928	7.7977	7.0118
LPE(18:2e)	LPE(18:2e)-H	GP	LPE	lysophosphatidylethanolamine	(18:2e)	462.299	216.235	C23 H45 O6 N1 P1	neg	0.00944989	6.9875	6.9946	7.0154	6.7491	6.8428	7.4322	7.403	7.0826	7.2878	7.0189	7.131	7.4798	7.5383	7.3329	7.1102	7.2274	6.5668	6.8174
LPE(18:3e)	LPE(18:3e)-H	GP	LPE	lysophosphatidylethanolamine	(18:3e)	460.283	166.963	C23 H43 O6 N1 P1	neg	0.00738466	6.0169	5.8623	5.9482	5.6889	5.8616	6.3855	6.2939	6.0361	6.3288	5.9476	6.067	6.3564	6.4083	6.3874	5.9911	6.2634	5.3092	5.7435
LPE(18:1e)	LPE(18:1e)-H	GP	LPE	lysophosphatidylethanolamine	(18:1e)	464.315	223.895	C23 H47 O6 N1 P1	neg	0.00971052	5.8295	6.0874	5.8955	4.9588	5.741	6.1122	6.4696	5.9148	6.3763	6.0702	6.0111	6.2409	6.2296	6.2162	5.8305	6.1618	5.4036	5.5707
LPE(20:4)	LPE(20:4)-H	GP	LPE	lysophosphatidylethanolamine	(20:4)	500.278	136.106	C25 H43 O7 N1 P1	neg	0.0071651	6.7882	7.1299	7.0846	7.1532	7.833	7.0112	7.2273	6.754	7.2879	8.0826	7.1134	7.2507	7.1051	6.898	7.2537	7.0539	7.7109	7.114
LPE(20:5)	LPE(20:5)-H	GP	LPE	lysophosphatidylethanolamine	(20:5)	498.263	115.93	C25 H41 O7 N1 P1	neg	0.0554684	4.8292	5.6512	5.3753	5.6645	6.2247	5.4424	5.4433	5.3041	5.7766	6.4581	5.4612	5.738	5.44	4.9728	5.4441	5.1061	6.1862	5.4155
LPE(22:4)	LPE(22:4)-H	GP	LPE	lysophosphatidylethanolamine	(22:4)	528.31	171.625	C27 H47 O7 N1 P1	neg	0.00770944	6.0958	6.2651	6.2864	6.2602	6.9111	6.1749	6.5568	5.8924	6.5259	7.3057	6.2577	6.4383	6.2955	6.0844	6.4961	6.369	6.8854	6.3463
LPE(22:5)	LPE(22:5)-H	GP	LPE	lysophosphatidylethanolamine	(22:5)	526.294	141.66	C27 H45 O7 N1 P1	neg	0.0152493	5.8305	6.1816	6.2146	6.2997	6.86	6.1316	6.3751	5.8721	6.4528	7.1044	6.2085	6.3215	6.0515	5.8302	6.3022	6.0961	6.8466	6.1627
LPE(20:3)	LPE(20:3)-H	GP	LPE	lysophosphatidylethanolamine	(20:3)	502.294	155.459	C25 H45 O7 N1 P1	neg	0.00729745	5.6975	6.0916	6.1574	6.2126	6.7347	5.9471	6.1468	5.7854	6.2744	6.9349	6.0566	6.332	6.0308	5.7783	6.278	6.052	6.7308	6.0433
LPG(18:2)	LPG(18:2)-H	GP	LPG	lysophosphatidylglycerol	(18:2)	507.273	115.149	C24 H44 O9 N0 P1	neg	0.00786054	5.6786	5.6419	5.8855	5.8979	5.7227	5.8032	6.6078	5.7129	5.8642	5.685	5.8377	5.8065	5.9288	5.7037	5.8658	5.5943	5.6993	5.7459
LPG(18:1)	LPG(18:1)-H	GP	LPG	lysophosphatidylglycerol	(18:1)	509.288	139.503	C24 H46 O9 N0 P1	neg	0.00843428	5.9635	5.8825	6.3652	6.1379	5.8217	6.2638	7.0472	5.9591	6.3423	6.0284	6.1698	6.1435	6.2802	6.0901	6.4857	6.0847	6.052	5.9764
LPI(18:0)	LPI(18:0)-H	GP	LPI	lysophosphatidylinositol	(18:0)	599.32	181.767	C27 H52 O12 N0 P1	neg	0.00346025	6.3436	6.4155	6.4725	6.5504	6.4662	6.3967	6.6797	6.0891	6.8329	6.3932	6.382	6.5396	6.1826	6.183	6.608	6.5757	6.7294	6.4185
LPI(20:4)	LPI(20:4)-H	GP	LPI	lysophosphatidylinositol	(20:4)	619.289	106.818	C29 H48 O12 N0 P1	neg	0.00887445	6.031	6.2884	6.3303	6.3895	6.3635	6.1692	6.0465	6.0433	6.6497	6.4235	6.2844	6.3313	6.0845	5.9552	6.6064	6.2439	6.4254	6.3885
MGDG(41:8)	MGDG(41:8)-H	SoG1	MGDG	Monogalactosyldiacylglycerol	(41:8)	839.568	684.582	C50 H79 O10	neg	0.0262961	6.9909	6.7878	6.8113	6.7443	6.5972	7.2067	6.7719	6.5559	6.9755	6.8544	7.0115	6.5139	6.5177	6.4842	7.1997	7.0808	7.1278	6.6672
MGDG(43:12)	MGDG(43:12)-H	SoG1	MGDG	Monogalactosyldiacylglycerol	(43:12)	859.537	358.128	C52 H75 O10	neg	0.0105665	5.4706	5.5231	5.4268	5.5221	5.3931	5.5467	5.3014	5.5436	5.7341	5.6781	5.4882	5.5726	5.5747	5.4989	6.0348	5.6867	5.4627	5.771
MGDG(38:1e)	MGDG(38:1e)-H	SoG1	MGDG	Monogalactosyldiacylglycerol	(38:1e)	797.651	809.767	C47 H89 O9	neg	0.0128428	6.2617	6.398	6.2485	6.2419	6.2536	6.1018	6.4674	6.2288	6.1142	6.679	6.1335	6.2448	6.3446	6.2268	6.1407	6.2396	6.2601	6.2151
PC(10:0/11:3)	PC(10:0/11:3)+HCOO	GP	PC	phosphatidylcholine	(10:0/11:3)	618.341	153.778	C30 H53 O10 N1 P1	neg	0.013906	6.0684	6.2239	6.1589	6.2764	6.4024	6.046	5.8932	5.6551	6.3026	6.3509	6.2043	6.2371	6.1687	5.8243	6.4916	6.036	6.1561	5.9942
PC(11:0/12:4)	PC(11:0/12:4)+HCOO	GP	PC	phosphatidylcholine	(11:0/12:4)	644.357	170.676	C32 H55 O10 N1 P1	neg	0.016343	5.9463	5.9709	6.0334	5.9761	6.1627	5.894	5.4559	5.4262	6.1283	6.2573	5.9345	5.8836	5.979	5.9733	6.4281	5.9818	6.0112	5.8357
PC(14:0/18:2)	PC(14:0/18:2)+HCOO	GP	PC	phosphatidylcholine	(14:0/18:2)	774.529	581.174	C41 H77 O10 N1 P1	neg	0.00713622	7.0512	6.9802	7.0394	7.1724	6.9578	7.274	7.0794	7.1415	6.9813	6.9475	7.1832	7.4438	7.2848	6.8559	7.0737	6.9625	7.0009	7.1196
PC(14:0e/18:2)	PC(14:0e/18:2)+HCOO	GP	PC	phosphatidylcholine	(14:0e/18:2)	760.55	621.591	C41 H79 O9 N1 P1	neg	0.0343504	6.754	6.6822	6.7554	6.6329	6.6406	6.747	6.629	6.6477	6.5878	6.5658	6.6843	6.54	6.7583	6.7842	6.8738	6.783	6.7271	6.6612
PC(14:1e/18:2)	PC(14:1e/18:2)+HCOO	GP	PC	phosphatidylcholine	(14:1e/18:2)	758.534	612.681	C41 H77 O9 N1 P1	neg	0.0235698	6.3684	6.3441	6.4002	6.1502	6.2633	6.395	6.3201	6.3051	6.2365	6.1714	6.3215	6.1884	6.3406	6.2723	6.3817	6.2821	6.2402	6.3682
PC(15:0/10:0)	PC(15:0/10:0)+HCOO	GP	PC	phosphatidylcholine	(15:0/10:0)	680.451	266.936	C34 H67 O10 N1 P1	neg	0.0588318	5.8365	5.9904	6.3893	6.0696	6.3371	6.0887	5.9697	5.8609	6.3484	5.4333	6.0604	5.8606	5.9656	6.1179	6.3111	6.1946	5.9731	5.7439
PC(15:0/18:2)	PC(15:0/18:2)+HCOO	GP	PC	phosphatidylcholine	(15:0/18:2)	788.545	615.116	C42 H79 O10 N1 P1	neg	0.0206023	7.2674	7.4634	7.3645	7.201	7.1502	7.3733	7.301	7.3551	7.3181	7.1876	7.3603	7.264	7.2497	7.1889	7.3306	7.2179	7.2876	7.3732
PC(16:0/11:2)	PC(16:0/11:2)+HCOO	GP	PC	phosphatidylcholine	(16:0/11:2)	704.451	543.125	C36 H67 O10 N1 P1	neg	0.0295282	5.483	6.0224	5.9862	6.3573	6.4168	5.9994	5.6335	5.5944	6.3005	6.1138	5.8651	6.0751	5.4719	5.4119	6.332	5.3096	6.1515	5.6349
PC(16:0/14:0)	PC(16:0/14:0)+HCOO	GP	PC	phosphatidylcholine	(16:0/14:0)	750.529	627.542	C39 H77 O10 N1 P1	neg	0.00476544	6.975	6.7851	6.8367	6.7416	6.8099	7.0022	7.2863	6.9089	6.8557	7.0613	6.9695	6.9831	7.1503	6.8467	6.9363	6.9323	6.7848	6.8857
PC(16:0/16:0)	PC(16:0/16:0)+HCOO	GP	PC	phosphatidylcholine	(16:0/16:0)	778.56	720.451	C41 H81 O10 N1 P1	neg	0.00468723	6.2655	6.9592	6.7507	6.8493	6.8519	6.8866	6.7992	6.9747	6.8207	7.0153	6.9658	6.3162	6.9597	7.1445	6.9596	7.0673	6.2417	6.8997
PC(16:0/16:1)	PC(16:0/16:1)+HCOO	GP	PC	phosphatidylcholine	(16:0/16:1)	776.545	633.942	C41 H79 O10 N1 P1	neg	0.0149538	7.7474	7.8221	7.6834	7.8007	7.6284	7.9771	7.8472	7.8656	7.8047	7.7544	7.7909	7.8527	7.9941	7.6979	7.9533	7.7639	7.6462	7.8155
PC(16:0/18:1)	PC(16:0/18:1)+HCOO	GP	PC	phosphatidylcholine	(16:0/18:1)	804.576	692.241	C43 H83 O10 N1 P1	neg	0.00740857	8.8393	8.9314	8.8017	8.8911	8.8401	8.9906	8.7891	8.88	8.9354	8.9335	8.8487	8.8277	8.9751	8.8239	8.8785	8.8732	8.8418	8.8184
PC(16:0/18:2)	PC(16:0/18:2)-CH3	GP	PC	phosphatidylcholine	(16:0/18:2)	742.539	668.688	C41 H77 O8 N1 P1	neg	0.0124782	6.9004	6.968	6.8247	7.1567	6.988	7.134	6.8016	6.97	6.8312	7.0449	7.0093	6.6691	6.9686	6.8666	6.9209	6.9717	7.0164	6.9785
PC(10:0/11:4)	PC(10:0/11:4)+HCOO	GP	PC	phosphatidylcholine	(10:0/11:4)	616.326	134.697	C30 H51 O10 N1 P1	neg	0.00841736	6.7456	6.9432	6.8674	6.8688	7.2305	6.7872	6.6658	6.3874	6.9921	7.2465	6.9196	6.9054	6.903	6.7505	7.2236	6.6528	6.9394	6.7968
PC(16:0/20:4)	PC(16:0/20:4)+HCOO	GP	PC	phosphatidylcholine	(16:0/20:4)	826.56	667.411	C45 H81 O10 N1 P1	neg	0.0170006	6.0907	6.3234	6.0652	6.0966	6.3911	6.1738	6.0916	5.9374	6.2196	6.4001	6.1526	6.367	6.0788	6.196	6.1646	6.0678	6.2471	6.2414
PC(16:0/20:5)	PC(16:0/20:5)+HCOO	GP	PC	phosphatidylcholine	(16:0/20:5)	824.545	592.453	C45 H79 O10 N1 P1	neg	0.0180251	6.4877	6.8862	6.5531	6.5731	6.6755	6.6584	6.474	6.6033	6.4217	6.7037	6.7193	6.9697	6.8425	6.4116	6.6155	6.4103	6.6328	6.5172
PC(16:0/22:5)	PC(16:0/22:5)+HCOO	GP	PC	phosphatidylcholine	(16:0/22:5)	852.576	638.711	C47 H83 O10 N1 P1	neg	0.00958892	7.4031	7.4572	7.2483	7.2721	7.3729	7.2011	7.2497	7.3414	7.1814	7.482	7.4005	7.503	7.4524	7.2852	7.3207	7.2285	7.2572	7.4021
PC(16:0e/16:0)	PC(16:0e/16:0)+HCOO	GP	PC	phosphatidylcholine	(16:0e/16:0)	764.581	726.438	C41 H83 O9 N1 P1	neg	0.00972306	7.8345	7.7117	7.5188	7.5618	7.7953	7.6415	8.3387	7.7519	7.8122	7.6845	7.7773	7.6544	7.6421	7.9626	7.8159	7.6801	7.7277	7.6612
PC(16:0e/18:1)	PC(16:0e/18:1)+HCOO	GP	PC	phosphatidylcholine	(16:0e/18:1)	790.597	729.615	C43 H85 O9 N1 P1	neg	0.00792581	8.3937	8.4435	8.2926	8.3042	8.3351	8.2584	8.3218	8.3577	8.3973	8.3004	8.2892	8.3438	8.2603	8.5173	8.4273	8.3977	8.4192	8.2408
PC(16:0e/18:2)	PC(16:0e/18:2)+HCOO	GP	PC	phosphatidylcholine	(16:0e/18:2)	788.581	683.617	C43 H83 O9 N1 P1	neg	0.00735281	8.9837	8.9094	8.9678	8.959	8.9598	8.9437	8.9068	8.9646	9.0337	8.7833	8.9423	8.7997	8.9694	9.1208	8.9932	9.0123	9.0378	8.8921
PC(16:0e/19:1)	PC(16:0e/19:1)+HCOO	GP	PC	phosphatidylcholine	(16:0e/19:1)	804.612	760.107	C44 H87 O9 N1 P1	neg	0.0107773	6.7661	6.8607	6.8627	6.4029	6.471	6.638	6.5142	6.6604	6.7068	6.6752	6.4336	6.4866	6.4904	6.8737	6.6982	6.7241	6.8694	6.4479
PC(16:0e/20:4)	PC(16:0e/20:4)+HCOO	GP	PC	phosphatidylcholine	(16:0e/20:4)	812.581	672.926	C45 H83 O9 N1 P1	neg	0.010828	8.5491	8.6151	8.4962	8.4338	8.6365	8.5773	8.523	8.4427	8.5786	8.6328	8.5076	8.5259	8.6282	8.6544	8.5761	8.5449	8.379	8.4124
PC(16:1/18:1)	PC(16:1/18:1)+HCOO	GP	PC	phosphatidylcholine	(16:1/18:1)	802.56	646.6	C43 H81 O10 N1 P1	neg	0.010229	9.3868	9.3795	9.4529	9.4132	9.3417	9.4375	9.3122	9.4134	9.4322	9.3321	9.4859	9.421	9.3088	9.3052	9.531	9.3848	9.3632	9.4006
PC(16:1/18:2)	PC(16:1/18:2)+HCOO	GP	PC	phosphatidylcholine	(16:1/18:2)	800.545	589.123	C43 H79 O10 N1 P1	neg	0.00747548	7.3362	7.4836	7.3947	7.6603	7.2887	7.6989	7.4956	7.5754	7.3981	7.381	7.6173	7.8021	7.7001	7.244	7.5501	7.3057	7.3988	7.5908
PC(16:1/18:3)	PC(16:1/18:3)+HCOO	GP	PC	phosphatidylcholine	(16:1/18:3)	798.529	543.386	C43 H77 O10 N1 P1	neg	0.295993	5.2362	5.6406	5.4387	6.144	5.6891	5.6734	6.1672	5.7187	5.0667	5.5316	5.7314	6	5.7062	5.4488	5.4008	5.4615	5.6106	5.9673
PC(16:1e/16:0)	PC(16:1e/16:0)+HCOO	GP	PC	phosphatidylcholine	(16:1e/16:0)	762.565	717.601	C41 H81 O9 N1 P1	neg	0.0135687	7.1974	7.2371	7.1527	7.117	7.2724	6.9787	7.2221	7.1592	7.2365	7.1883	7.1329	7.1318	7.2362	7.2697	7.0635	7.1962	7.1776	7.164
PC(16:1e/16:1)	PC(16:1e/16:1)+HCOO	GP	PC	phosphatidylcholine	(16:1e/16:1)	760.55	664.15	C41 H79 O9 N1 P1	neg	0.0639305	6.5758	6.4308	6.655	6.5954	6.5341	6.7495	6.6872	6.6259	6.6938	6.5557	6.4671	6.5328	6.6761	6.6288	6.6743	6.6945	6.6231	6.6565
PC(16:1e/18:2)	PC(16:1e/18:2)+HCOO	GP	PC	phosphatidylcholine	(16:1e/18:2)	786.565	674.947	C43 H81 O9 N1 P1	neg	0.00649967	8.7702	8.8358	8.8884	8.8163	8.8532	8.7931	8.7666	8.7573	8.8217	8.6785	8.6493	8.722	8.8652	8.8285	8.7631	8.8053	8.843	8.8261
PC(16:1e/18:3)	PC(16:1e/18:3)+HCOO	GP	PC	phosphatidylcholine	(16:1e/18:3)	784.55	640.112	C43 H79 O9 N1 P1	neg	0.0036309	6.9758	7.0169	7.0735	6.8822	7.3064	7.0021	7.0153	6.9108	6.9118	7.1785	6.9805	7.0298	7.0323	7.0538	7.021	6.9658	6.992	7.1035
PC(16:1e/20:5)	PC(16:1e/20:5)+HCOO	GP	PC	phosphatidylcholine	(16:1e/20:5)	808.55	620.939	C45 H79 O9 N1 P1	neg	0.0148522	6.6049	6.9304	6.908	6.7218	6.8288	6.6354	6.749	6.5918	6.7874	6.9751	6.7882	6.8832	6.8494	6.6626	6.8199	6.7021	6.6375	6.8312
PC(16:1e/22:4)	PC(16:1e/22:4)+HCOO	GP	PC	phosphatidylcholine	(16:1e/22:4)	838.597	703.457	C47 H85 O9 N1 P1	neg	0.0090157	7.4748	7.4909	7.4733	7.4642	7.4808	7.3604	7.3991	7.252	7.4901	7.5306	7.3523	7.573	7.4839	7.4787	7.4814	7.5104	7.3996	7.5167
PC(16:2e/19:0)	PC(16:2e/19:0)+HCOO	GP	PC	phosphatidylcholine	(16:2e/19:0)	802.597	714.013	C44 H85 O9 N1 P1	neg	0.0109542	7.6532	7.6094	7.6572	7.2917	7.5084	7.5681	7.555	7.5549	7.5883	7.2402	7.5297	7.5148	7.5214	7.7409	7.5158	7.5713	7.705	7.4001
PC(16:2e/22:5)	PC(16:2e/22:5)-CH3	GP	PC	phosphatidylcholine	(16:2e/22:5)	774.544	707.702	C45 H77 O7 N1 P1	neg	0.00772826	7.1936	7.099	7.0406	7.0135	7.0778	7.194	6.9015	7.068	6.9269	7.1265	7.0483	6.9777	7.143	7.0007	6.8918	7.1129	7.1221	7.1957
PC(17:0/18:1)	PC(17:0/18:1)+HCOO	GP	PC	phosphatidylcholine	(17:0/18:1)	818.592	720.47	C44 H85 O10 N1 P1	neg	0.00822876	7.2961	7.4805	7.3086	7.1224	7.1731	7.1905	7.1608	7.2604	7.3621	7.2191	7.0828	7.3103	7.2799	7.1989	7.2492	7.2983	7.2462	7.179
PC(17:0/18:2)	PC(17:0/18:2)+HCOO	GP	PC	phosphatidylcholine	(17:0/18:2)	816.576	676.708	C44 H83 O10 N1 P1	neg	0.00897777	7.6616	7.7361	7.6305	7.4413	7.5346	7.6427	7.5465	7.6889	7.7092	7.4921	7.4897	7.6136	7.6029	7.5268	7.6751	7.6566	7.6075	7.6191
PC(17:0/20:4)	PC(17:0/20:4)+HCOO	GP	PC	phosphatidylcholine	(17:0/20:4)	840.576	665.976	C46 H83 O10 N1 P1	neg	0.0109949	6.1014	6.5174	5.9063	5.8257	6.0771	5.8643	5.9172	5.9784	6.0895	6.1005	5.9	6.0581	5.9711	6	6.0528	5.9637	5.8018	5.9306
PC(17:1/16:0)	PC(17:1/16:0)+HCOO	GP	PC	phosphatidylcholine	(17:1/16:0)	790.56	664.17	C42 H81 O10 N1 P1	neg	0.0539992	7.0863	7.345	7.155	6.926	6.9593	7.2137	7.0635	7.1775	7.2095	6.9544	6.948	7.0595	7.1015	6.9982	7.2863	7.0818	7.0875	6.9834
PC(17:1/18:2)	PC(17:1/18:2)+HCOO	GP	PC	phosphatidylcholine	(17:1/18:2)	814.56	621.367	C44 H81 O10 N1 P1	neg	0.0543941	6.618	6.7763	6.7152	6.5819	6.3961	6.8648	6.6119	6.7374	6.5871	6.5543	6.6818	6.722	6.6847	6.266	6.7799	6.4005	6.582	6.6267
PC(18:0/16:0)	PC(18:0/16:0)+HCOO	GP	PC	phosphatidylcholine	(18:0/16:0)	806.592	746.217	C43 H85 O10 N1 P1	neg	0.00840495	7.331	7.3102	7.1892	7.1588	7.4032	7.0566	7.8478	7.2741	7.2892	7.5312	7.2333	7.3581	7.3764	7.3717	7.2045	7.2615	7.2666	7.3227
PC(18:0/18:0)	PC(18:0/18:0)+HCOO	GP	PC	phosphatidylcholine	(18:0/18:0)	834.623	809.653	C45 H89 O10 N1 P1	neg	0.0281867	5.932	5.806	5.6188	5.7036	5.8899	5.5847	6.2555	5.8331	6.1125	7.1988	5.5794	5.822	6.6094	5.7766	5.6143	5.7614	5.7906	5.8607
PC(18:0/18:1)	PC(18:0/18:1)+HCOO	GP	PC	phosphatidylcholine	(18:0/18:1)	832.607	750.453	C45 H87 O10 N1 P1	neg	0.00747101	8.0714	8.099	7.8742	7.9319	7.9707	7.8967	7.9403	8.0177	7.9605	8.2044	7.8583	8.0828	8.2917	7.9403	7.9536	8.0999	7.9002	7.9712
PC(18:0/20:1)	PC(18:0/20:1)+HCOO	GP	PC	phosphatidylcholine	(18:0/20:1)	860.639	810.385	C47 H91 O10 N1 P1	neg	0.0511035	6.0243	6.1402	6.005	6.0588	6.0801	5.7724	6.2058	5.8132	6.0013	6.714	5.9193	5.908	6.3577	6.0153	5.5355	6.0986	5.8859	5.9928
PC(18:0/20:2)	PC(18:0/20:2)+HCOO	GP	PC	phosphatidylcholine	(18:0/20:2)	858.623	757.311	C47 H89 O10 N1 P1	neg	0.0113023	6.7206	6.7119	6.5903	6.6261	6.7261	6.5561	6.6906	6.6031	6.5599	6.8971	6.426	6.6465	6.7198	6.5395	6.5539	6.7618	6.5429	6.6901
PC(18:0/20:4)	PC(18:0/20:4)+HCOO	GP	PC	phosphatidylcholine	(18:0/20:4)	854.592	695.04	C47 H85 O10 N1 P1	neg	0.034251	7.3097	7.3428	7.2099	7.1722	7.4058	7.2642	7.1961	7.1456	7.2597	7.5247	7.2706	7.2845	7.4259	7.3025	7.1467	7.3899	7.2406	7.3405
PC(18:0/22:4)	PC(18:0/22:4)+HCOO	GP	PC	phosphatidylcholine	(18:0/22:4)	882.623	734.771	C49 H89 O10 N1 P1	neg	0.012514	6.4666	6.4143	7.0632	6.2214	6.4249	6.6237	6.3149	6.2007	7.1546	6.6325	6.1825	6.5239	6.2987	6.4438	6.0474	6.5369	6.2373	6.4413
PC(18:0e/16:0)	PC(18:0e/16:0)+HCOO	GP	PC	phosphatidylcholine	(18:0e/16:0)	792.612	788.171	C43 H87 O9 N1 P1	neg	0.0061339	7.2066	7.2086	6.9134	6.9389	7.3025	7.0293	7.5302	7.1529	7.0259	7.1926	7.2205	7.0027	7.1648	7.31	7.0454	7.0071	7.2193	7.066
PC(18:0e/18:1)	PC(18:0e/18:1)+HCOO	GP	PC	phosphatidylcholine	(18:0e/18:1)	818.628	791.778	C45 H89 O9 N1 P1	neg	0.00435676	7.2987	7.4198	7.2454	7.2071	7.3067	7.2217	7.298	7.3207	7.2182	7.2418	7.3046	7.1686	7.2709	7.4865	7.3031	7.3355	7.4371	7.1306
PC(18:0e/18:2)	PC(18:0e/18:2)+HCOO	GP	PC	phosphatidylcholine	(18:0e/18:2)	816.612	742.379	C45 H87 O9 N1 P1	neg	0.0049647	8.1756	8.1707	8.1405	8.1163	8.2616	8.0977	8.1289	8.2165	8.1382	8.012	8.2094	8.3489	8.1025	8.3577	8.2318	8.1894	8.329	8.2298
PC(18:0e/20:2)	PC(18:0e/20:2)+HCOO	GP	PC	phosphatidylcholine	(18:0e/20:2)	844.644	799.734	C47 H91 O9 N1 P1	neg	0.00245211	6.6946	6.6932	6.5724	6.5241	6.5987	6.4034	6.5039	6.468	6.5316	6.73	6.5395	6.3746	6.5436	6.6748	6.4395	6.6503	6.5877	6.463
PC(18:0e/20:3)	PC(18:0e/20:3)+HCOO	GP	PC	phosphatidylcholine	(18:0e/20:3)	842.628	758.446	C47 H89 O9 N1 P1	neg	0.0292727	6.9882	7.069	6.9364	6.8814	7.0422	6.8714	6.8444	6.8544	6.8711	7.0535	6.9044	7.0383	7.0037	7.0216	6.8606	6.9805	6.9559	6.8941
PC(18:0e/20:4)	PC(18:0e/20:4)+HCOO	GP	PC	phosphatidylcholine	(18:0e/20:4)	840.612	731.518	C47 H87 O9 N1 P1	neg	0.00757095	7.5193	7.6667	7.4533	7.3965	7.7376	7.3753	7.5101	7.4508	7.5016	7.7079	7.5296	7.6993	7.416	7.6466	7.4562	7.5177	7.572	7.5673
PC(18:0e/22:4)	PC(18:0e/22:4)+HCOO	GP	PC	phosphatidylcholine	(18:0e/22:4)	868.644	772.639	C49 H91 O9 N1 P1	neg	0.120529	7.0376	6.8356	6.7227	6.7132	6.8216	6.6229	6.7248	6.6467	6.6282	6.8856	6.6349	6.6634	6.6506	6.9082	6.6342	6.8186	6.7523	6.6967
PC(18:0e/22:5)	PC(18:0e/22:5)+HCOO	GP	PC	phosphatidylcholine	(18:0e/22:5)	866.628	731.696	C49 H89 O9 N1 P1	neg	0.00759395	6.8218	6.8554	6.7023	6.6366	6.8677	6.5289	6.6963	6.6844	6.7793	6.9233	6.6341	6.8698	6.6252	6.8741	6.7383	6.812	6.7628	6.7413
PC(18:1/18:1)	PC(18:1/18:1)+HCOO	GP	PC	phosphatidylcholine	(18:1/18:1)	830.592	704.845	C45 H85 O10 N1 P1	neg	0.00252969	8.8107	8.6763	8.6262	8.7026	8.7269	8.8403	8.7547	8.6888	8.7116	8.7461	8.7205	8.8239	8.7571	8.6908	8.7244	8.7435	8.605	8.7375
PC(18:1/18:2)	PC(18:1/18:2)+HCOO	GP	PC	phosphatidylcholine	(18:1/18:2)	828.576	651.341	C45 H83 O10 N1 P1	neg	0.0152761	8.4621	8.4538	8.3274	8.4112	8.3577	8.5989	8.449	8.5374	8.3849	8.5127	8.557	8.6588	8.4878	8.3803	8.6613	8.3393	8.4013	8.5412
PC(18:1e/18:2)	PC(18:1e/18:2)+HCOO	GP	PC	phosphatidylcholine	(18:1e/18:2)	814.597	686.43	C45 H85 O9 N1 P1	neg	0.00680903	8.4025	8.414	8.332	8.3036	8.4255	8.4295	8.3173	8.3446	8.4617	8.249	8.4176	8.2936	8.3215	8.4709	8.4594	8.4342	8.4582	8.3572
PC(18:1e/20:2)	PC(18:1e/20:2)+HCOO	GP	PC	phosphatidylcholine	(18:1e/20:2)	842.628	731.191	C47 H89 O9 N1 P1	neg	0.0177839	6.7345	6.8453	6.645	6.4889	6.9585	6.5168	6.7254	6.6252	6.6688	6.9075	6.7756	6.8654	6.5993	6.8647	6.6396	6.7432	6.7857	6.7554
PC(18:1e/20:3)	PC(18:1e/20:3)+HCOO	GP	PC	phosphatidylcholine	(18:1e/20:3)	840.612	747.411	C47 H87 O9 N1 P1	neg	0.015929	6.9788	7.0621	6.9234	6.8793	7.13	6.6442	6.8826	6.7903	6.9535	7.1077	6.8529	7.1129	7.0919	7.0631	6.9436	6.977	6.9657	7.1037
PC(18:1e/22:4)	PC(18:1e/22:4)+HCOO	GP	PC	phosphatidylcholine	(18:1e/22:4)	866.628	716.57	C49 H89 O9 N1 P1	neg	0.0397828	7.1708	7.2414	7.0536	6.9369	7.158	7.0681	7.0728	6.9496	7.1565	7.2579	7.1354	7.1514	7.322	7.207	7.0556	7.1883	7.1191	7.1289
PC(18:2/20:4)	PC(18:2/20:4)+HCOO	GP	PC	phosphatidylcholine	(18:2/20:4)	850.56	590.13	C47 H81 O10 N1 P1	neg	0.0301452	6.5983	6.6122	6.5729	6.4511	6.639	6.5951	6.5058	6.5344	6.3401	6.7051	6.7181	7.0626	6.8218	6.5267	6.5176	6.4654	6.54	6.6514
PC(18:2e/18:3)	PC(18:2e/18:3)+HCOO	GP	PC	phosphatidylcholine	(18:2e/18:3)	810.565	632.129	C45 H81 O9 N1 P1	neg	0.0424663	7.5539	7.632	7.6308	7.4723	7.6029	7.6312	7.5362	7.4734	7.5325	7.5562	7.5834	7.5247	7.6738	7.6585	7.636	7.5493	7.5578	7.6407
PC(18:2e/20:4)	PC(18:2e/20:4)+HCOO	GP	PC	phosphatidylcholine	(18:2e/20:4)	836.581	665.714	C47 H83 O9 N1 P1	neg	0.00811698	7.6978	7.8468	7.7008	7.7289	7.8636	7.7601	7.8355	7.5611	7.7069	7.9256	7.6912	7.7845	7.808	7.7525	7.752	7.6606	7.6911	7.8817
PC(18:2e/22:4)	PC(18:2e/22:4)+HCOO	GP	PC	phosphatidylcholine	(18:2e/22:4)	864.612	710.405	C49 H87 O9 N1 P1	neg	0.00910077	6.8014	6.9058	6.7208	6.6302	6.9315	6.6874	6.7807	6.6436	6.7371	7.1622	7.0973	6.8428	6.9474	6.8562	6.8452	6.7971	6.8409	6.8522
PC(18:2e/22:5)	PC(18:2e/22:5)+HCOO	GP	PC	phosphatidylcholine	(18:2e/22:5)	862.597	668.352	C49 H85 O9 N1 P1	neg	0.00799077	6.6554	6.846	6.6342	6.4947	6.7861	7.0319	6.742	6.5692	6.6751	6.8436	6.6633	6.7353	6.9591	6.7643	6.6397	6.6472	6.6939	6.8209
PC(19:3)	PC(19:3)+HCOO	GP	PC	phosphatidylcholine	(19:3)	590.31	119.523	C28 H49 O10 N1 P1	neg	0.0155119	5.6997	5.8641	5.8776	5.7661	6.0693	5.8053	5.5921	5.4532	5.9681	5.8884	5.8135	5.798	5.6958	5.5675	6.3067	5.5453	5.9267	5.541
PC(20:1/18:2)	PC(20:1/18:2)+HCOO	GP	PC	phosphatidylcholine	(20:1/18:2)	856.607	703.562	C47 H87 O10 N1 P1	neg	0.0294954	6.7921	6.8126	6.5945	6.7746	6.7754	6.8298	6.7454	6.8208	6.8558	6.93	6.9336	7.0817	6.9373	6.6795	6.8365	6.7918	6.6949	6.8267
PC(33:2e)	PC(33:2e)+HCOO	GP	PC	phosphatidylcholine	(33:2e)	774.565	654.45	C42 H81 O9 N1 P1	neg	0.0240404	7.2829	7.2963	7.4125	6.9625	7.0968	7.3137	7.2446	7.1835	7.2794	6.9798	7.1112	7.0051	7.1042	7.3596	7.3981	7.2709	7.2932	7.0743
PC(36:1e)	PC(36:1e)-CH3	GP	PC	phosphatidylcholine	(36:1e)	758.607	875.654	C43 H85 O7 N1 P1	neg	0.0104127	6.0538	6.0708	5.9058	5.7937	5.2868	5.2597	5.7017	5.8961	5.7136	6.2156	5.845	5.6804	5.9263	6.0998	5.3516	5.8669	5.6799	5.6654
PC(8:0/11:1)	PC(8:0/11:1)+HCOO	GP	PC	phosphatidylcholine	(8:0/11:1)	594.341	175.91	C28 H53 O10 N1 P1	neg	0.0134733	6.4517	6.6274	6.6139	6.6637	6.6948	6.52	6.334	6.2731	6.7513	6.6045	6.5544	6.5349	6.6236	6.5275	7.0623	6.4798	6.7236	6.289
PC(8:0/11:2)	PC(8:0/11:2)+HCOO	GP	PC	phosphatidylcholine	(8:0/11:2)	592.326	140.081	C28 H51 O10 N1 P1	neg	0.00570089	7.5465	7.5688	7.715	7.7228	7.8381	7.5313	7.3847	7.3073	7.7667	7.6659	7.6171	7.5423	7.5848	7.521	8.0024	7.4865	7.7828	7.4449
PE(10:0/11:2)	PE(10:0/11:2)-H	GP	PE	phosphatidylethanolamine	(10:0/11:2)	532.304	301.143	C26 H47 O8 N1 P1	neg	0.00823191	6.1735	6.2213	6.3523	6.1193	5.9647	6.4924	7.5647	6.2745	6.3257	6.2221	6.4054	6.708	6.657	6.5051	6.2632	6.4201	6.0581	6.089
PE(14:1e/20:4)	PE(14:1e/20:4)-H	GP	PE	phosphatidylethanolamine	(14:1e/20:4)	694.482	619.583	C39 H69 O7 N1 P1	neg	0.0200542	6.2906	6.1827	6.1138	6.0845	6.0798	6.2541	5.9961	6.1497	6.0748	6.2927	6.1184	6.1569	6.2395	5.9862	6.0306	6.1621	6.1122	6.1526
PE(16:0/18:1)	PE(16:0/18:1)-H	GP	PE	phosphatidylethanolamine	(16:0/18:1)	716.524	709.312	C39 H75 O8 N1 P1	neg	0.0074242	7.4098	7.4434	7.5605	7.4542	7.4383	7.3648	7.5539	7.49	7.4174	7.559	7.5107	7.5002	7.5779	7.4015	7.492	7.3351	7.5188	7.3801
PE(16:0/18:2)	PE(16:0/18:2)-H	GP	PE	phosphatidylethanolamine	(16:0/18:2)	714.508	664.042	C39 H73 O8 N1 P1	neg	0.0184893	7.9146	7.9245	8.2279	7.9719	7.9315	7.9018	7.7451	7.9621	7.8061	7.8531	7.9883	7.8552	7.8648	7.8198	7.8856	7.8098	8.043	7.8925
PE(10:0/11:3)	PE(10:0/11:3)-H	GP	PE	phosphatidylethanolamine	(10:0/11:3)	530.289	216.332	C26 H45 O8 N1 P1	neg	0.0110556	6.1493	6.1524	6.1897	5.9278	5.931	6.5727	6.5756	6.2734	6.4205	6.1892	6.3146	6.6273	6.6433	6.5069	6.3075	6.4814	5.6828	5.9737
PE(16:0e/18:1)	PE(16:0e/18:1)-H	GP	PE	phosphatidylethanolamine	(16:0e/18:1)	702.544	747.49	C39 H77 O7 N1 P1	neg	0.00737915	7.4249	7.4019	7.4206	7.3709	7.1606	7.1622	7.379	7.4204	7.4641	7.3704	7.4084	7.2642	7.3968	7.4516	7.4251	7.4137	7.3902	7.307
PE(16:0e/22:6)	PE(16:0e/22:6)-H	GP	PE	phosphatidylethanolamine	(16:0e/22:6)	748.529	664.121	C43 H75 O7 N1 P1	neg	0.0830795	7.1372	7.1797	6.8239	7.2432	7.1689	7.3505	7.0309	6.8641	7.0196	7.2495	7.2409	7.1395	7.1626	6.9843	7.074	7.2278	6.8252	7.1596
PE(16:1e/16:0)	PE(16:1e/16:0)-H	GP	PE	phosphatidylethanolamine	(16:1e/16:0)	674.513	736.486	C37 H73 O7 N1 P1	neg	0.00802505	6.6125	6.3587	6.4999	6.4827	6.496	6.3303	6.884	6.4745	6.4636	6.9117	6.5526	6.5205	6.5619	6.6013	6.3103	6.464	6.4664	6.4887
PE(16:0/20:4)	PE(16:0/20:4)-H	GP	PE	phosphatidylethanolamine	(16:0/20:4)	738.508	652.909	C41 H73 O8 N1 P1	neg	0.0148031	7.0887	7.3644	7.4048	7.1658	7.197	7.1383	7.0102	7.1211	7.023	7.3503	7.4317	7.1801	7.1765	7.0975	7.2171	7.0927	7.2014	7.197
PE(16:1e/18:2)	PE(16:1e/18:2)-H	GP	PE	phosphatidylethanolamine	(16:1e/18:2)	698.513	693.674	C39 H73 O7 N1 P1	neg	0.00519989	8.7693	8.5968	8.7398	8.7905	8.6779	8.7814	8.6299	8.7841	8.6736	8.5494	8.6771	8.6103	8.7513	8.7766	8.5869	8.7813	8.7343	8.6376
PE(16:1e/18:3)	PE(16:1e/18:3)-H	GP	PE	phosphatidylethanolamine	(16:1e/18:3)	696.497	651.504	C39 H71 O7 N1 P1	neg	0.0167872	7.0235	7.0127	7.1013	6.9742	6.8347	7.1346	6.9714	7.1569	6.8756	6.7932	7.1273	6.9532	6.8465	7.0076	7.1204	7.0228	6.9701	6.8586
PE(16:1e/19:1)	PE(16:1e/19:1)-H	GP	PE	phosphatidylethanolamine	(16:1e/19:1)	714.544	770.625	C40 H77 O7 N1 P1	neg	0.00996186	7.1071	7.0943	7.1399	6.8218	6.8376	6.9486	7.0116	7.0877	7.0106	6.9243	6.8343	6.8145	7.0108	7.0922	6.8646	7.0121	7.1453	6.8855
PE(16:1e/20:3)	PE(16:1e/20:3)-H	GP	PE	phosphatidylethanolamine	(16:1e/20:3)	724.529	726.434	C41 H75 O7 N1 P1	neg	0.0356233	7.3572	7.3045	7.229	7.3367	7.2253	7.246	7.0918	7.2915	7.2466	7.2721	7.1901	7.37	7.3052	7.2156	7.3695	7.328	7.2937	7.2876
PE(16:1e/20:4)	PE(16:1e/20:4)-H	GP	PE	phosphatidylethanolamine	(16:1e/20:4)	722.513	665.734	C41 H73 O7 N1 P1	neg	0.0128633	7.2766	7.1927	7.163	7.1175	7.065	7.3673	7.1528	7.193	7.119	7.0835	7.0436	7.2345	7.145	7.2436	7.2237	7.2388	7.1889	7.2093
PE(16:1e/20:5)	PE(16:1e/20:5)-H	GP	PE	phosphatidylethanolamine	(16:1e/20:5)	720.497	640.177	C41 H71 O7 N1 P1	neg	0.013097	7.5437	7.6611	7.5897	7.6506	7.4454	7.6647	7.4814	7.6749	7.4056	7.6386	7.7216	7.8088	7.9326	7.4356	7.4674	7.4255	7.4991	7.5625
PE(16:1e/22:4)	PE(16:1e/22:4)-H	GP	PE	phosphatidylethanolamine	(16:1e/22:4)	750.544	722.094	C43 H77 O7 N1 P1	neg	0.00198115	8.3875	8.2776	8.2531	8.2751	8.2432	8.2112	8.1528	8.2549	8.2317	8.3506	8.2111	8.3266	8.2984	8.2873	8.1486	8.3684	8.2033	8.365
PE(16:1e/22:6)	PE(16:1e/22:6)-H	GP	PE	phosphatidylethanolamine	(16:1e/22:6)	746.513	664.067	C43 H73 O7 N1 P1	neg	0.00601506	7.4079	7.4485	7.484	7.6084	7.4852	7.5979	7.3191	7.6662	7.318	7.4052	7.6215	7.5202	7.4479	7.1375	7.2793	7.3691	7.5744	7.4832
PE(17:0/18:2)	PE(17:0/18:2)-H	GP	PE	phosphatidylethanolamine	(17:0/18:2)	728.524	692.857	C40 H75 O8 N1 P1	neg	0.0117397	7.1088	7.1156	7.2578	6.9521	7.1865	7.1608	7.0175	7.0424	7.151	7.0625	7.0215	6.8462	7.1283	7.0821	6.9944	7.1472	7.2478	7.0593
PE(17:0/20:4)	PE(17:0/20:4)-H	GP	PE	phosphatidylethanolamine	(17:0/20:4)	752.524	681.959	C42 H75 O8 N1 P1	neg	0.0369926	6.3118	6.6774	6.4634	6.1031	6.4769	6.2489	6.1646	6.0748	6.2982	6.5349	6.3285	6.183	6.3421	6.343	6.3074	6.4344	6.271	6.3679
PE(18:0/18:1)	PE(18:0/18:1)-H	GP	PE	phosphatidylethanolamine	(18:0/18:1)	744.555	767.944	C41 H79 O8 N1 P1	neg	0.00447238	7.937	7.9885	7.8528	7.9673	7.8829	7.8081	8.0983	7.9532	7.8527	8.0844	7.7682	7.8526	8.0329	7.9167	7.743	7.8129	8.0315	7.8743
PE(18:0/18:3)	PE(18:0/18:3)-H	GP	PE	phosphatidylethanolamine	(18:0/18:3)	740.524	691.219	C41 H75 O8 N1 P1	neg	0.0181764	6.6829	6.6784	6.6706	6.8059	6.8214	6.8648	6.5901	6.6987	6.6638	6.8002	6.7239	6.7799	6.7647	6.66	6.6086	6.7201	6.7412	6.7531
PE(16:1e/18:1)	PE(16:1e/18:1)-H	GP	PE	phosphatidylethanolamine	(16:1e/18:1)	700.529	740.968	C39 H75 O7 N1 P1	neg	0.0195196	8.1042	8.0579	8.0426	8.0875	7.9484	7.8517	8.031	8.0904	8.0819	8.3124	8.0131	8.0127	8.1504	8.1068	7.9136	8.0645	8.0713	7.9347
PE(18:0/20:3)	PE(18:0/20:3)-H	GP	PE	phosphatidylethanolamine	(18:0/20:3)	768.555	754.616	C43 H79 O8 N1 P1	neg	0.0102193	6.6266	6.7494	6.6379	6.7242	6.6814	6.6492	6.5597	6.4916	6.5239	6.9307	6.5692	6.7388	6.8025	6.6793	6.6918	6.7838	6.6179	6.6816
PE(18:0/20:4)	PE(18:0/20:4)-H	GP	PE	phosphatidylethanolamine	(18:0/20:4)	766.539	710.913	C43 H77 O8 N1 P1	neg	0.00770826	8.2281	8.4338	8.2447	8.3876	8.4463	8.3517	8.2748	8.218	8.1838	8.5972	8.3883	8.4734	8.4087	8.3284	8.3061	8.4075	8.2813	8.3875
PE(18:0/20:5)	PE(18:0/20:5)-H	GP	PE	phosphatidylethanolamine	(18:0/20:5)	764.524	672.189	C43 H75 O8 N1 P1	neg	0.0240459	6.5895	6.954	6.6965	6.8871	6.7741	6.9069	6.6594	6.6291	6.622	7.0559	6.6466	6.8585	6.757	6.6922	6.6393	6.7902	6.6852	6.7461
PE(18:0/22:4)	PE(18:0/22:4)-H	GP	PE	phosphatidylethanolamine	(18:0/22:4)	794.571	750.561	C45 H81 O8 N1 P1	neg	0.00791185	7.3152	7.2675	7.2029	7.172	7.2409	7.0488	7.1719	7.1008	7.1345	7.4117	7.1131	7.1503	7.4151	7.2401	7.1627	7.3193	7.1853	7.3092
PE(18:0e/16:0)	PE(18:0e/16:0)-H	GP	PE	phosphatidylethanolamine	(18:0e/16:0)	704.56	808.18	C39 H79 O7 N1 P1	neg	0.00335397	6.7103	6.6461	6.4912	6.4367	6.5288	6.3276	6.7537	6.7248	6.5693	6.6237	6.6704	6.4342	6.5128	6.7884	6.4315	6.4023	6.6181	6.5538
PE(18:0e/18:1)	PE(18:0e/18:1)-H	GP	PE	phosphatidylethanolamine	(18:0e/18:1)	730.576	810.936	C41 H81 O7 N1 P1	neg	0.0151059	7.1539	7.2702	7.1786	7.0735	7.0021	6.9389	7.1892	7.201	7.1727	7.2777	7.0668	6.9793	7.0626	7.1564	7.0331	7.1228	7.1424	6.9735
PE(18:0e/22:4)	PE(18:0e/22:4)-H	GP	PE	phosphatidylethanolamine	(18:0e/22:4)	780.591	793.17	C45 H83 O7 N1 P1	neg	0.00645527	7.3292	7.3856	7.3181	7.1185	7.211	6.9131	7.1472	7.163	7.3824	7.3991	7.1254	7.0733	7.113	7.2401	7.01	7.2936	7.1584	7.2783
PE(18:1/18:1)	PE(18:1/18:1)-H	GP	PE	phosphatidylethanolamine	(18:1/18:1)	742.539	721.839	C41 H77 O8 N1 P1	neg	0.0015406	8.7988	8.75	8.8363	9.0074	8.879	8.8438	8.7592	8.8167	8.7793	8.8618	8.7666	8.8885	8.8795	8.8294	8.6569	8.8814	8.8657	8.8554
PE(18:1/18:2)	PE(18:1/18:2)-H	GP	PE	phosphatidylethanolamine	(18:1/18:2)	740.524	667.732	C41 H75 O8 N1 P1	neg	0.00553413	7.8258	7.8661	7.7554	8.0118	7.8835	8.0131	7.7522	7.8423	7.7022	7.971	7.9303	7.9716	7.8465	7.7711	7.8021	7.829	7.9314	7.8817
PE(18:1/20:3)	PE(18:1/20:3)-H	GP	PE	phosphatidylethanolamine	(18:1/20:3)	766.539	693.519	C43 H77 O8 N1 P1	neg	0.199235	6.4895	6.4588	6.351	6.4785	6.515	7.1692	7.0349	7.1596	7.5445	6.5888	6.5922	6.4637	6.5208	5.8521	7.3463	7.4778	7.1479	6.4557
PE(18:1/20:4)	PE(18:1/20:4)-H	GP	PE	phosphatidylethanolamine	(18:1/20:4)	764.524	609.937	C43 H75 O8 N1 P1	neg	0.0228597	6.2815	6.2584	5.9272	6.1796	5.8388	6.1593	6.19	6.1621	6.2154	6.0704	6.5349	6.3196	6.4718	6.2042	6.2748	5.9764	6.0669	6.1964
PE(18:1/22:0)	PE(18:1/22:0)-H	GP	PE	phosphatidylethanolamine	(18:1/22:0)	800.617	899.865	C45 H87 O8 N1 P1	neg	0.00733732	5.6357	5.6966	5.5821	5.5891	5.4033	5.439	6.2266	5.3775	5.2482	6.472	5.524	4.946	6.0821	5.5651	5.4442	5.4777	5.4672	5.2836
PE(18:1/22:1)	PE(18:1/22:1)-H	GP	PE	phosphatidylethanolamine	(18:1/22:1)	798.602	828.857	C45 H85 O8 N1 P1	neg	0.0587529	5.804	5.8451	5.6137	5.6659	5.7188	5.3874	5.9021	5.559	5.3649	6.3704	5.7098	5.2032	5.7719	5.4638	5.1789	5.5744	5.6631	5.6406
PE(18:1/24:0)	PE(18:1/24:0)-H	GP	PE	phosphatidylethanolamine	(18:1/24:0)	828.649	973.215	C47 H91 O8 N1 P1	neg	0.0326414	5.1904	5.3705	5.3227	5.3665	5.408	4.9789	5.6489	5.143	4.8625	6.454	5.441	5.0298	5.8336	5.5138	4.7961	4.985	4.9529	5.2041
PE(18:1e/16:0)	PE(18:1e/16:0)-H	GP	PE	phosphatidylethanolamine	(18:1e/16:0)	702.544	798.757	C39 H77 O7 N1 P1	neg	0.0159066	6.7232	6.5836	6.6547	6.6396	6.7002	6.6406	6.9803	6.6813	6.5013	7.3217	6.7869	6.4856	6.7517	6.783	6.4264	6.5913	6.7298	6.6521
PE(18:1e/18:1)	PE(18:1e/18:1)-H	GP	PE	phosphatidylethanolamine	(18:1e/18:1)	728.56	802.014	C41 H79 O7 N1 P1	neg	0.00313287	8.0133	8.0285	8.0138	8.01	7.953	7.8914	8.0253	8.1012	7.9017	8.2335	8.01	7.8189	8.0261	8.0697	7.8369	7.9749	8.1089	7.9258
PE(18:1e/18:2)	PE(18:1e/18:2)-H	GP	PE	phosphatidylethanolamine	(18:1e/18:2)	726.544	752.116	C41 H77 O7 N1 P1	neg	0.00917963	8.8665	8.788	8.9171	8.8825	8.8574	8.7064	8.7732	8.9706	8.7224	8.694	8.7274	8.7587	8.8953	8.9678	8.752	8.8767	8.93	8.8208
PE(18:1e/20:1)	PE(18:1e/20:1)-H	GP	PE	phosphatidylethanolamine	(18:1e/20:1)	756.591	865.877	C43 H83 O7 N1 P1	neg	0.015487	6.6392	6.5474	6.3749	6.5114	6.3111	6.1952	6.5269	6.4062	6.4284	7.2658	6.5756	6.2704	6.7219	6.5912	6.4212	6.5817	6.3651	6.382
PE(18:1e/20:2)	PE(18:1e/20:2)-H	GP	PE	phosphatidylethanolamine	(18:1e/20:2)	754.576	808.556	C43 H81 O7 N1 P1	neg	0.00925201	7.1633	7.0347	7.0525	7.1078	7.0651	6.9298	7.1001	7.0472	6.9657	7.3924	7.0482	7.0301	7.1443	7.1285	6.9405	7.1655	7.0847	7.0692
PE(18:1e/20:4)	PE(18:1e/20:4)-H	GP	PE	phosphatidylethanolamine	(18:1e/20:4)	750.544	739.604	C43 H77 O7 N1 P1	neg	0.0039541	8.8053	8.896	8.7733	8.7986	8.9182	8.5892	8.7457	8.7959	8.7073	8.9334	8.7675	9.0206	8.8118	8.8187	8.5606	8.7816	8.8215	8.9408
PE(18:1e/20:5)	PE(18:1e/20:5)-H	GP	PE	phosphatidylethanolamine	(18:1e/20:5)	748.529	701.493	C43 H75 O7 N1 P1	neg	0.0150125	7.9392	7.9653	7.8651	7.8985	7.9096	7.9826	7.8439	7.9059	7.7772	7.9172	7.9756	8.0183	8.0069	7.8317	7.74	7.8363	7.8721	7.9701
PE(18:1e/22:2)	PE(18:1e/22:2)-H	GP	PE	phosphatidylethanolamine	(18:1e/22:2)	782.607	877.304	C45 H85 O7 N1 P1	neg	0.0160864	6.5037	6.4498	6.2323	6.2294	5.9414	5.9792	6.1768	6.1274	5.9714	6.9958	6.322	6.0685	6.2117	6.3245	6.1236	6.2691	6.1514	6.1746
PE(18:1e/22:3)	PE(18:1e/22:3)-H	GP	PE	phosphatidylethanolamine	(18:1e/22:3)	780.591	831.529	C45 H83 O7 N1 P1	neg	0.0147121	6.7299	6.6102	6.8615	6.5824	6.3958	6.3296	6.431	6.5189	6.3754	6.9216	6.5578	6.409	6.6493	6.6865	6.4693	6.651	6.5084	6.4744
PE(18:1e/22:4)	PE(18:1e/22:4)-H	GP	PE	phosphatidylethanolamine	(18:1e/22:4)	778.576	741.134	C45 H81 O7 N1 P1	neg	0.124575	7.2905	6.9532	7.2372	7.2306	7.2296	7.0083	6.9858	7.2032	7.1947	7.2396	6.9581	7.2775	7.1371	7.0357	7.0149	7.3081	7.1929	7.1858
PE(18:1e/22:5)	PE(18:1e/22:5)-H	GP	PE	phosphatidylethanolamine	(18:1e/22:5)	776.56	739.379	C45 H79 O7 N1 P1	neg	0.0448123	8.2361	8.0495	7.9925	8.0482	8.0112	7.7559	8.1229	8.0324	7.8683	8.0395	7.954	8.1196	7.9612	7.9809	7.9518	8.1896	7.9853	8.0314
PE(18:1e/22:6)	PE(18:1e/22:6)-H	GP	PE	phosphatidylethanolamine	(18:1e/22:6)	774.544	721.188	C45 H77 O7 N1 P1	neg	0.0162751	7.3519	7.4358	7.4259	7.5857	7.6282	7.4145	7.3255	7.6876	7.2678	7.4629	7.6753	7.6438	7.4407	7.213	7.0971	7.3983	7.6225	7.532
PE(18:2e/17:1)	PE(18:2e/17:1)-H	GP	PE	phosphatidylethanolamine	(18:2e/17:1)	712.529	723.343	C40 H75 O7 N1 P1	neg	0.0143333	7.9012	7.8423	7.9358	7.6281	7.6671	7.7737	7.7299	7.8763	7.7571	7.4921	7.6063	7.7722	7.6843	7.8954	7.6331	7.8628	7.8501	7.7008
PE(18:2e/18:2)	PE(18:2e/18:2)-H	GP	PE	phosphatidylethanolamine	(18:2e/18:2)	724.529	698.433	C41 H75 O7 N1 P1	neg	0.00855853	8.6629	8.5212	8.5948	8.5884	8.5454	8.7335	8.548	8.6103	8.5442	8.4661	8.5529	8.6091	8.5807	8.6738	8.3956	8.6583	8.587	8.5712
PE(18:2e/20:3)	PE(18:2e/20:3)-H	GP	PE	phosphatidylethanolamine	(18:2e/20:3)	750.544	689.486	C43 H77 O7 N1 P1	neg	0.00963275	7.7793	7.8948	7.801	7.7049	7.7084	7.7777	7.6218	7.7153	7.8433	7.7518	7.7808	7.6525	7.7747	7.7275	7.7171	7.8495	8.0889	8.1982
PE(18:2e/20:4)	PE(18:2e/20:4)-H	GP	PE	phosphatidylethanolamine	(18:2e/20:4)	748.529	685.859	C43 H75 O7 N1 P1	neg	0.007242	8.6295	8.6382	8.5324	8.6038	8.6006	8.6584	8.5056	8.5893	8.5477	8.6571	8.6617	8.577	8.6105	8.5354	8.4637	8.5953	8.5483	8.7186
PE(18:2e/22:5)	PE(18:2e/22:5)-H	GP	PE	phosphatidylethanolamine	(18:2e/22:5)	774.544	687.496	C45 H77 O7 N1 P1	neg	0.00674252	7.6568	7.6269	7.5427	7.6458	7.5368	7.6889	7.4852	7.6059	7.5524	7.6148	7.671	7.5824	7.5752	7.5544	7.5134	7.6447	7.5293	7.663
PE(18:2e/22:6)	PE(18:2e/22:6)-H	GP	PE	phosphatidylethanolamine	(18:2e/22:6)	772.529	667.556	C45 H75 O7 N1 P1	neg	0.00790766	7.1716	7.18	7.1443	7.2911	7.2253	7.4196	7.0586	7.3634	7.0244	7.1599	7.4657	7.2019	7.1097	6.8936	6.8942	7.1043	7.3466	7.2591
PE(18:3e/18:2)	PE(18:3e/18:2)-H	GP	PE	phosphatidylethanolamine	(18:3e/18:2)	722.513	651.286	C41 H73 O7 N1 P1	neg	0.00732801	7.7327	7.5388	7.7574	7.5929	7.5872	7.7803	7.6446	7.6931	7.5815	7.474	7.6561	7.5652	7.5813	7.7387	7.7141	7.7086	7.6147	7.6445
PE(18:3e/20:4)	PE(18:3e/20:4)-H	GP	PE	phosphatidylethanolamine	(18:3e/20:4)	746.513	638.635	C43 H73 O7 N1 P1	neg	0.0167684	7.8094	7.7132	7.7544	7.6848	7.7907	7.8583	7.7305	7.7494	7.5607	7.9234	7.8478	7.8812	8.0553	7.754	7.6195	7.7252	7.6936	7.9048
PE(20:1/18:1)	PE(20:1/18:1)-H	GP	PE	phosphatidylethanolamine	(20:1/18:1)	770.571	774.205	C43 H81 O8 N1 P1	neg	0.0323948	6.4383	6.454	6.3842	6.5817	6.5627	6.4559	6.7014	6.3851	6.5575	6.8652	6.4091	6.5092	6.6202	6.4999	6.2507	6.5394	6.3852	6.4614
PE(22:0/18:2)	PE(22:0/18:2)-H	GP	PE	phosphatidylethanolamine	(22:0/18:2)	798.602	844.943	C45 H85 O8 N1 P1	neg	0.0112885	5.9323	5.7201	5.8419	5.905	5.9012	5.6873	5.9927	5.8771	5.6845	6.0886	5.7369	5.657	5.9096	5.9616	5.5201	5.809	5.9082	5.8851
PE(34:1/20:4)	PE(34:1/20:4)-H	GP	PE	phosphatidylethanolamine	(34:1/20:4)	988.774	1036.92	C59 H107 O8 N1 P1	neg	0.0179128	5.4687	5.2815	5.2706	5.4523	5.5762	4.8861	6.0471	5.1942	5.6729	5.4016	5.2055	5.0791	5.4407	5.2104	5.4915	5.9468	5.2602	5.3168
PE(37:2e)	PE(37:2e)-H	GP	PE	phosphatidylethanolamine	(37:2e)	742.576	832.183	C42 H81 O7 N1 P1	neg	0.0132633	6.082	6.0503	5.9748	5.6962	5.8261	5.7873	5.9816	5.8824	5.8196	6.1397	5.902	5.7572	6.0601	6.0044	5.7099	5.99	6.0042	5.8065
PE(37:3e)	PE(37:3e)-H	GP	PE	phosphatidylethanolamine	(37:3e)	740.56	782.429	C42 H79 O7 N1 P1	neg	0.0227424	6.6541	6.5293	6.613	6.3878	6.5024	6.5637	6.5601	6.5275	6.4	6.3958	6.4306	6.4187	6.5276	6.5996	6.4273	6.6531	6.7779	6.5796
PE(18:0/20:1)	PE(18:0/20:1)-H	GP	PE	phosphatidylethanolamine	(18:0/20:1)	772.586	827.654	C43 H83 O8 N1 P1	neg	0.00725531	6.0468	5.9937	5.9379	6.0452	6.0223	5.8637	6.5039	5.7913	6.0595	6.6842	5.9468	5.792	6.2953	5.9886	5.6099	6.0186	5.9704	5.9957
PE(8:0/11:2)	PE(8:0/11:2)-H	GP	PE	phosphatidylethanolamine	(8:0/11:2)	504.273	147.79	C24 H43 O8 N1 P1	neg	0.00818416	7.5807	7.49	7.7036	7.845	7.817	7.6592	7.3647	7.4259	7.759	7.5704	7.6178	7.5902	7.5464	7.599	8.1101	7.5891	7.7851	7.3436
PE(9:0/10:2)	PE(9:0/10:2)-H	GP	PE	phosphatidylethanolamine	(9:0/10:2)	504.273	205.558	C24 H43 O8 N1 P1	neg	0.0125359	6.398	6.3404	6.5145	6.3755	6.1634	6.6908	7.2691	6.4423	6.6837	6.3543	6.4792	6.7423	6.7613	6.6563	6.5794	6.6555	6.1362	6.28
PE(9:0/12:4)	PE(9:0/12:4)-H	GP	PE	phosphatidylethanolamine	(9:0/12:4)	528.273	141.474	C26 H43 O8 N1 P1	neg	0.00761116	7.5452	7.6123	7.6034	7.765	7.8806	7.6271	7.3261	7.2998	7.7541	7.8373	7.6948	7.6536	7.5673	7.4601	8.038	7.4813	7.7086	7.4462
PE(9:0/14:4)	PE(9:0/14:4)-H	GP	PE	phosphatidylethanolamine	(9:0/14:4)	556.304	180.767	C28 H47 O8 N1 P1	neg	0.0116257	6.843	6.7521	6.8177	6.9516	6.9872	6.8278	6.5098	6.4654	7.0083	7.0614	6.8685	6.8131	6.7787	6.7116	7.3142	6.8056	6.8833	6.6401
PE(42:5e)	PE(42:5e)-H	GP	PE	phosphatidylethanolamine	(42:5e)	806.607	833.648	C47 H85 O7 N1 P1	neg	0.0560087	6.1729	6.1029	5.9687	5.7566	5.6812	5.3947	5.8432	5.9238	5.8621	7.0109	5.8066	5.8096	6.4165	6.032	5.6473	6.0552	5.6288	5.9411
PG(16:0/18:2)	PG(16:0/18:2)-H	GP	PG	phosphatidylglycerol	(16:0/18:2)	745.503	588.86	C40 H74 O10 N0 P1	neg	0.013452	6.8224	6.8925	6.8299	6.8823	6.8786	7.0175	6.9279	6.9221	6.5559	6.8365	7.018	7.0211	7.0597	6.7804	6.7381	6.6134	6.8684	6.7869
PG(18:1/18:1)	PG(18:1/18:1)-H	GP	PG	phosphatidylglycerol	(18:1/18:1)	773.534	641.832	C42 H78 O10 N0 P1	neg	0.0100846	7.0053	7.2565	7.077	7.1642	7.0807	7.2939	7.1054	7.0735	6.852	7.1725	7.2609	7.27	7.4369	6.9742	6.9162	6.9511	7.106	7.0602
PG(18:1/18:2)	PG(18:1/18:2)-H	GP	PG	phosphatidylglycerol	(18:1/18:2)	771.518	548.524	C42 H76 O10 N0 P1	neg	0.0239615	6.0116	5.9328	6.3827	6.2725	5.9273	6.2753	6.1564	6.0338	5.9284	6.0833	6.2445	6.2772	6.3083	6.123	6.062	6.0844	6.1059	6.1937
PG(33:0)	PG(33:0)-H	GP	PG	phosphatidylglycerol	(33:0)	735.518	276.139	C39 H76 O10 N0 P1	neg	0.0229435	5.954	5.929	5.8575	5.8048	5.9712	5.9645	6.6859	5.9354	5.7512	5.9971	6.1068	5.9555	6.1168	5.9743	6.1448	6.0468	5.962	6.0407
PG(18:0/20:4)	PG(18:0/20:4)-H	GP	PG	phosphatidylglycerol	(18:0/20:4)	797.534	638.645	C44 H78 O10 N0 P1	neg	0.00770443	6.1883	6.5742	6.0251	6.0897	5.8981	6.4137	6.0932	6.1571	5.1262	6.1804	6.4495	6.4728	6.7258	5.91	5.8413	5.9257	6.2186	6.2108
phSM(t36:1)	phSM(t36:1)-CH3	SP	phSM	sphingomyelin(phytosphingosine)	(t36:1)	747.566	626.315	C40 H80 O8 N2 P1	neg	0.0117993	7.991	8.0731	8.0124	7.9559	8.0382	8.045	8.5214	7.9769	8.111	8.1049	8.1267	7.9961	8.1921	8.0125	8.1883	8.0695	8.0033	8.0203
PI(16:0/18:1)	PI(16:0/18:1)-H	GP	PI	phosphatidylinositol	(16:0/18:1)	835.534	619.623	C43 H80 O13 N0 P1	neg	0.0276843	6.8745	6.9694	7.1953	7.1724	6.7863	7.0046	6.9404	6.997	7.1149	6.8869	7.0281	6.82	6.9224	6.9748	6.9637	6.9368	7.0302	6.8526
PI(16:0/18:2)	PI(16:0/18:2)-H	GP	PI	phosphatidylinositol	(16:0/18:2)	833.519	576.524	C43 H78 O13 N0 P1	neg	0.0084801	6.8037	6.777	6.9907	6.877	6.761	6.9802	6.9419	7.0205	6.923	6.7128	7.0291	6.9293	6.862	6.7678	6.8037	6.7363	6.9112	6.8149
PI(16:0/20:3)	PI(16:0/20:3)-H	GP	PI	phosphatidylinositol	(16:0/20:3)	859.534	590.578	C45 H80 O13 N0 P1	neg	0.00686601	6.5423	6.6562	6.7116	6.5025	6.5156	6.7865	6.6104	6.6702	6.5727	6.5645	6.771	6.7339	6.6003	6.4842	6.4889	6.5366	6.6561	6.6096
PI(17:0/18:2)	PI(17:0/18:2)-H	GP	PI	phosphatidylinositol	(17:0/18:2)	847.534	603.531	C44 H80 O13 N0 P1	neg	0.00741945	6.2537	6.4964	6.5234	6.0787	6.2441	6.4865	6.3935	6.3673	6.393	6.1247	6.3194	6.0427	6.1513	6.319	6.0821	6.2324	6.4033	6.3661
PI(17:0/20:3)	PI(17:0/20:3)-H	GP	PI	phosphatidylinositol	(17:0/20:3)	873.55	638.657	C46 H82 O13 N0 P1	neg	0.0128971	6.493	6.6599	6.7669	6.319	6.3328	6.608	6.4291	6.6084	6.6757	6.3467	6.4361	6.4066	6.4707	6.3883	6.2669	6.8197	6.5099	6.2324
PI(18:0/18:1)	PI(18:0/18:1)-H	GP	PI	phosphatidylinositol	(18:0/18:1)	863.566	676.856	C45 H84 O13 N0 P1	neg	0.00273664	7.3761	7.6786	7.6132	7.7575	7.4287	7.7137	7.4879	7.5047	7.6799	7.4117	7.3706	7.4289	7.5894	7.3834	7.4532	7.5663	7.6495	7.4342
PI(18:0/18:2)	PI(18:0/18:2)-H	GP	PI	phosphatidylinositol	(18:0/18:2)	861.55	654.507	C45 H82 O13 N0 P1	neg	0.0498982	6.6711	6.8965	7.0747	7.0134	6.6888	7.2201	7.0665	6.7998	6.9856	6.7193	7.0662	6.5266	6.9118	6.8844	6.9703	6.9304	7.1255	6.8976
PI(18:0/18:3)	PI(18:0/18:3)-H	GP	PI	phosphatidylinositol	(18:0/18:3)	859.534	602.249	C45 H80 O13 N0 P1	neg	0.0158451	6.4497	6.5642	6.6355	6.5397	6.4267	6.7137	6.4921	6.4953	6.5137	6.4772	6.5825	6.5529	6.3665	6.3966	6.341	6.4756	6.508	6.4868
PI(18:0/20:3)	PI(18:0/20:3)-H	GP	PI	phosphatidylinositol	(18:0/20:3)	887.566	665.727	C47 H84 O13 N0 P1	neg	0.0166101	7.7486	7.9657	7.8724	7.8174	7.6656	7.9149	7.719	7.8002	7.7359	7.6515	8.1126	7.7705	7.6454	7.6288	7.7888	7.6827	7.83	7.6613
PI(18:0/20:4)	PI(18:0/20:4)-H	GP	PI	phosphatidylinositol	(18:0/20:4)	885.55	624.244	C47 H82 O13 N0 P1	neg	0.00684935	9.0803	9.134	9.1596	9.0242	9.0886	9.1049	9.0683	9.1349	9.1041	9.0278	9.1892	9.0451	8.9671	9.0268	9.0394	9.0194	9.0897	9.1291
PI(18:0/20:5)	PI(18:0/20:5)-H	GP	PI	phosphatidylinositol	(18:0/20:5)	883.534	583.952	C47 H80 O13 N0 P1	neg	0.016803	6.626	7.0159	6.7091	6.4548	6.5096	6.865	6.7289	6.8247	6.6437	6.6413	6.807	6.9663	6.6976	6.5071	6.6677	6.5712	6.6442	6.7634
PI(18:0/22:4)	PI(18:0/22:4)-H	GP	PI	phosphatidylinositol	(18:0/22:4)	913.581	664.111	C49 H86 O13 N0 P1	neg	0.00826434	7.185	7.4552	7.359	7.1883	7.2517	7.3552	7.2336	7.2651	7.2224	7.2756	7.0298	7.2303	7.0942	7.0117	7.0974	7.2143	7.2661	7.2566
PI(18:1/18:2)	PI(18:1/18:2)-H	GP	PI	phosphatidylinositol	(18:1/18:2)	859.534	577.571	C45 H80 O13 N0 P1	neg	0.00767013	7.2347	7.3286	7.274	7.2856	7.12	7.488	7.3346	7.5111	7.2933	7.2193	7.4857	7.5461	7.3362	7.17	7.2141	6.9959	7.3851	7.3914
PI(18:1/20:3)	PI(18:1/20:3)-H	GP	PI	phosphatidylinositol	(18:1/20:3)	885.55	593.812	C47 H82 O13 N0 P1	neg	0.00859135	6.3864	6.4579	6.3404	6.4892	6.2258	6.6308	6.3884	6.6021	6.2565	6.2292	6.5997	6.7215	6.5249	5.6889	6.354	6.316	6.4379	6.4235
PI(16:0/20:4)	PI(16:0/20:4)-H	GP	PI	phosphatidylinositol	(16:0/20:4)	857.519	561.144	C45 H78 O13 N0 P1	neg	0.00881036	6.9126	7.0097	6.914	6.7241	6.848	6.973	6.863	6.9976	6.9099	6.9038	7.1158	7.0254	6.9873	6.8487	6.9218	6.8132	6.8739	6.8897
PIP(42:10e)	PIP(42:10e)-H	GP	PIP	phosphatidylinositol	(42:10e)	995.506	576.576	C51 H81 O15 N0 P2	neg	0.00945859	6.1988	6.2409	6.2262	6.2851	6.0814	6.4298	6.2292	6.4418	6.183	5.0769	6.3959	6.4853	6.2935	6.1045	6.0943	5.94	6.3448	6.3798
PIP2(37:2e)	PIP2(37:2e)-H	GP	PIP2	phosphatidylinositol	(37:2e)	1021.52	622.844	C46 H88 O18 N0 P3	neg	0.029483	7.2627	7.0794	7.1702	7.3444	7.2917	7.0279	6.9057	7.1294	7.5509	7.0944	7.2259	6.9748	7.0093	7.2977	7.6042	7.4457	7.1793	7.1868
PS(16:0/18:2)	PS(16:0/18:2)-H	GP	PS	phosphatidylserine	(16:0/18:2)	758.498	593.976	C40 H73 O10 N1 P1	neg	0.0799497	6.2533	6.4025	6.6554	6.0573	6.2115	6.2016	6.381	6.5117	5.7811	6.2194	6.7035	6.1328	6.2691	6.2456	5.6679	5.8922	6.5671	5.8811
PS(16:1e/20:3)	PS(16:1e/20:3)-H	GP	PS	phosphatidylserine	(16:1e/20:3)	768.519	741.041	C42 H75 O9 N1 P1	neg	0.00704705	7.0582	6.8737	6.9313	7.1429	6.9006	6.5844	6.9476	6.9752	7.3143	7.1292	6.7596	6.8189	6.8921	7.0813	6.9687	7.1807	6.9832	6.8554
PS(16:1e/20:4)	PS(16:1e/20:4)-H	GP	PS	phosphatidylserine	(16:1e/20:4)	766.503	694.416	C42 H73 O9 N1 P1	neg	0.00310742	7.4247	7.1063	7.2169	7.5018	7.3605	7.2434	7.1675	7.2469	7.6607	7.1447	7.1915	7.106	7.1791	7.4643	7.4456	7.5884	7.2673	7.1951
PS(11:0/16:0)	PS(11:0/16:0)-H	GP	PS	phosphatidylserine	(11:0/16:0)	664.419	194.84	C33 H63 O10 N1 P1	neg	0.00744828	6.1686	6.713	6.4492	6.8378	6.8504	6.4516	6.1629	6.1167	6.8759	6.6389	6.3524	6.759	6.1634	6.1439	7.0276	6.4121	6.6332	6.0709
PS(16:1e/24:2)	PS(16:1e/24:2)-H	GP	PS	phosphatidylserine	(16:1e/24:2)	826.597	702.985	C46 H85 O9 N1 P1	neg	0.0456059	6.8407	6.9406	6.8402	6.3881	6.8364	6.8092	6.8223	6.6084	6.8446	6.7399	6.7916	6.8262	6.7653	6.9399	6.7544	6.7646	6.8537	6.7631
PS(18:0/18:1)	PS(18:0/18:1)-H	GP	PS	phosphatidylserine	(18:0/18:1)	788.545	751.806	C42 H79 O10 N1 P1	neg	0.0810636	6.8101	6.9883	6.8309	7.0824	6.7723	6.9918	7.0473	6.9157	7.1505	7.0462	7.3463	7.1323	7.0213	6.9063	6.8396	6.9421	7.2722	6.9024
PS(18:0/18:2)	PS(18:0/18:2)-H	GP	PS	phosphatidylserine	(18:0/18:2)	786.529	742.343	C42 H77 O10 N1 P1	neg	0.0345429	6.8735	6.8687	6.8181	6.8372	6.8128	6.7083	6.7809	6.9693	6.8425	6.7287	6.6518	6.8901	6.6816	6.7889	6.6481	6.8203	6.8828	6.9564
PS(16:1e/22:5)	PS(16:1e/22:5)-H	GP	PS	phosphatidylserine	(16:1e/22:5)	792.519	613.173	C44 H75 O9 N1 P1	neg	0.0544454	6.0805	6.2609	6.215	6.1292	6.0791	6.2773	6.1599	6.2144	5.9811	6.0993	6.3144	6.0845	6.0836	5.9643	6.0812	5.9469	6.1275	6.0984
PS(18:0/22:4)	PS(18:0/22:4)-H	GP	PS	phosphatidylserine	(18:0/22:4)	838.56	685.881	C46 H81 O10 N1 P1	neg	0.138292	7.1953	7.2679	7.108	7.5479	7.7541	6.841	7.1997	7.1041	6.9027	6.8136	7.1097	7.632	6.8497	7.026	7.6834	6.7851	7.1166	7.2179
PS(18:0/22:6)	PS(18:0/22:6)-H	GP	PS	phosphatidylserine	(18:0/22:6)	834.529	572.042	C46 H77 O10 N1 P1	neg	0.00718209	6.5004	6.4926	6.6649	6.5487	6.4481	6.6537	6.618	6.6873	6.5959	6.413	6.7071	6.619	6.5483	6.4236	6.4482	6.385	6.6207	6.4799
PS(18:1/18:2)	PS(18:1/18:2)-H	GP	PS	phosphatidylserine	(18:1/18:2)	784.513	709.384	C42 H75 O10 N1 P1	neg	0.0473787	6.4876	6.3347	6.4518	6.5333	6.483	6.0589	6.4202	6.4406	6.6009	6.3041	6.409	6.313	6.3984	6.456	6.6394	6.3693	6.4379	6.2978
PS(18:0/20:3)	PS(18:0/20:3)-H	GP	PS	phosphatidylserine	(18:0/20:3)	812.545	767.944	C44 H79 O10 N1 P1	neg	0.0271868	7.2758	7.2889	7.1185	7.3241	7.2436	7.0148	7.3578	7.2659	7.2433	7.3393	6.9126	7.0413	7.1454	7.274	7.009	7.1809	7.3386	7.2293
PS(18:1e/18:1)	PS(18:1e/18:1)-H	GP	PS	phosphatidylserine	(18:1e/18:1)	772.55	728.422	C42 H79 O9 N1 P1	neg	0.0319984	7.1486	7.4044	6.8802	7.051	7.0658	6.7055	7.0045	6.9686	6.9966	6.8431	7.0584	6.4871	6.8162	6.756	6.4074	7.0011	6.8833	6.6582
PS(18:1e/20:4)	PS(18:1e/20:4)-H	GP	PS	phosphatidylserine	(18:1e/20:4)	794.534	704.523	C44 H77 O9 N1 P1	neg	0.0547733	6.4029	6.5376	6.5928	6.5993	6.5933	6.4985	6.393	6.5276	6.8433	6.3759	6.299	6.527	6.0823	6.552	6.3446	6.7591	6.4486	6.4295
PS(20:2/20:3)	PS(20:2/20:3)-H	GP	PS	phosphatidylserine	(20:2/20:3)	836.545	734.943	C46 H79 O10 N1 P1	neg	0.00956314	6.5703	6.4096	6.3794	6.6926	6.52	6.0931	6.3408	6.3548	6.5714	6.5908	6.2382	6.5915	6.2531	6.3697	6.4662	6.5928	6.4072	6.5045
PS(20:3/18:2)	PS(20:3/18:2)-H	GP	PS	phosphatidylserine	(20:3/18:2)	808.513	667.257	C44 H75 O10 N1 P1	neg	0.00986181	7.0973	6.9846	6.9994	7.2477	7.2546	7.2426	7.089	7.0969	7.2571	7.0121	7.0139	7.0977	6.8947	7.102	7.2091	7.2752	7.1252	7.1445
PS(20:3e/16:0)	PS(20:3e/16:0)-H	GP	PS	phosphatidylserine	(20:3e/16:0)	770.534	747.396	C42 H77 O9 N1 P1	neg	0.041754	6.6737	6.5528	6.5914	6.6375	6.4775	6.1379	6.5328	6.7282	6.8486	6.528	6.4208	6.3562	6.4478	6.7074	6.6066	6.713	6.6067	6.503
PS(20:3e/22:6)	PS(20:3e/22:6)-H	GP	PS	phosphatidylserine	(20:3e/22:6)	842.534	720.755	C48 H77 O9 N1 P1	neg	0.014614	6.6003	6.2034	6.1839	6.5301	6.4956	6.1441	6.1059	6.4947	6.3981	6.1958	6.3698	6.3643	6.1444	6.2107	6.2254	6.3857	6.4329	6.3133
PS(20:4e/18:1)	PS(20:4e/18:1)-H	GP	PS	phosphatidylserine	(20:4e/18:1)	794.534	753.376	C44 H77 O9 N1 P1	neg	0.00797731	7.9745	7.8472	7.9036	8.0524	8.0165	7.6094	7.7653	7.8894	8.0211	7.7137	7.5979	7.7011	7.7594	8.0427	7.9335	8.0637	7.946	7.941
PS(38:2e)	PS(38:2e)-H	GP	PS	phosphatidylserine	(38:2e)	800.581	645.792	C44 H83 O9 N1 P1	neg	0.0733676	5.9935	6.7891	5.9421	6.0754	6.1222	6.8345	5.8363	5.9534	6.1082	5.8303	5.8458	6.0275	5.8822	5.9179	6.0662	6.132	5.8493	5.7585
PS(38:3e)	PS(38:3e)-H	GP	PS	phosphatidylserine	(38:3e)	798.565	807.47	C44 H81 O9 N1 P1	neg	0.036393	6.5374	6.6195	6.547	6.4807	6.4806	6.2928	6.4562	6.6248	6.5767	6.6235	6.283	6.1898	6.2139	6.5823	6.3862	6.506	6.5462	6.4076
PS(38:4e)	PS(38:4e)-H	GP	PS	phosphatidylserine	(38:4e)	796.55	802.003	C44 H79 O9 N1 P1	neg	0.0122204	7.3624	7.3869	7.3422	7.4051	7.3247	7.1046	7.3367	7.4494	7.2937	7.5085	7.1601	6.9568	7.19	7.44	7.0316	7.3613	7.4687	7.2834
PS(38:7e)	PS(38:7e)-H	GP	PS	phosphatidylserine	(38:7e)	790.503	680.82	C44 H73 O9 N1 P1	neg	0.0262783	7.4255	7.2285	7.1757	7.4833	7.4264	7.1973	7.1918	7.2462	7.7172	7.3363	7.1643	7.2589	7.3787	7.2698	7.623	7.5745	7.1836	7.3493
PS(40:4e)	PS(40:4e)-H	GP	PS	phosphatidylserine	(40:4e)	824.581	865.977	C46 H83 O9 N1 P1	neg	0.00495556	6.0663	5.9935	5.8354	5.8636	5.619	5.2226	5.8973	5.7755	5.6662	6.6782	5.7557	5.1963	6.004	6.0398	5.3794	5.9179	5.7283	5.8413
PS(40:5e)	PS(40:5e)-H	GP	PS	phosphatidylserine	(40:5e)	822.565	808.242	C46 H81 O9 N1 P1	neg	0.00761915	6.5177	6.409	6.3853	6.4764	6.4471	6.1177	6.3086	6.4074	6.3303	6.6676	6.186	6.2271	6.2644	6.5118	6.2305	6.5399	6.4828	6.4418
PS(40:6)	PS(40:6)-H	GP	PS	phosphatidylserine	(40:6)	834.529	711.238	C46 H77 O10 N1 P1	neg	0.027856	7.3155	7.3099	7.172	7.5006	7.5542	7.1848	7.2551	7.2434	7.4468	7.4901	7.282	7.4325	7.2959	7.4242	7.4897	7.5594	7.3308	7.3776
PS(40:6e)	PS(40:6e)-H	GP	PS	phosphatidylserine	(40:6e)	820.55	786.747	C46 H79 O9 N1 P1	neg	0.0190792	6.4403	6.5215	6.3688	6.4292	6.3965	6.2443	6.2414	6.4302	6.3019	6.4886	6.2025	6.2815	6.3412	6.3382	6.2121	6.3536	6.4394	6.4071
PS(40:7e)	PS(40:7e)-H	GP	PS	phosphatidylserine	(40:7e)	818.534	759.765	C46 H77 O9 N1 P1	neg	0.0464153	6.7625	6.6939	6.6675	6.8022	6.8754	6.3489	6.4987	6.7992	6.7091	6.7158	6.4026	6.6293	6.4905	6.7027	6.5412	6.6847	6.7344	6.9097
PS(40:8e)	PS(40:8e)-H	GP	PS	phosphatidylserine	(40:8e)	816.519	686.049	C46 H75 O9 N1 P1	neg	0.0310949	7.1606	6.9959	6.8509	7.2258	7.153	6.9206	6.8151	6.9745	7.4994	7.0865	7.0569	7.0232	6.9131	7.0075	7.3424	7.3258	6.972	7.1211
PS(42:7e)	PS(42:7e)-H	GP	PS	phosphatidylserine	(42:7e)	846.565	801.429	C48 H81 O9 N1 P1	neg	0.0196305	6.4899	6.2648	6.1895	6.338	6.4329	6.069	6.1542	6.225	6.2187	6.4578	5.9785	5.9993	6.015	6.394	5.6098	6.3545	6.2309	6.3991
PS(42:8e)	PS(42:8e)-H	GP	PS	phosphatidylserine	(42:8e)	844.55	741.001	C48 H79 O9 N1 P1	neg	0.0140764	6.9633	6.8284	6.8942	7.2361	7.0252	6.537	6.9963	6.884	7.176	6.7711	6.7547	6.9978	6.9183	7.0076	6.8119	7.1249	6.8865	6.874
PS(44:9)	PS(44:9)-H	GP	PS	phosphatidylserine	(44:9)	884.545	624.451	C50 H79 O10 N1 P1	neg	0.00713335	6.9913	6.9187	6.9085	6.9894	6.9907	6.8892	6.9365	6.8707	7.1696	6.8948	7.0011	6.8043	6.8309	6.9407	6.9865	7.008	6.9155	6.9118
PS(18:1/20:3)	PS(18:1/20:3)-H	GP	PS	phosphatidylserine	(18:1/20:3)	810.529	720.995	C44 H77 O10 N1 P1	neg	0.00856778	7.7963	7.6478	7.6853	7.968	7.9079	7.599	7.6375	7.6967	8.0132	7.6797	7.547	7.8304	7.6316	7.8534	7.7938	8.0027	7.7509	7.7143
SM(d32:1)	SM(d32:1)+HCOO	SP	SM	sphingomyelin	(d32:1)	719.534	554.277	C38 H76 O8 N2 P1	neg	0.00733438	6.241	6.3027	6.3226	6.1796	6.179	6.3156	6.3707	6.2249	6.3173	6.4663	6.3655	6.4977	6.6477	6.2664	6.4746	6.3037	6.2395	6.2452
SM(d34:2)	SM(d34:2)+HCOO	SP	SM	sphingomyelin	(d34:2)	745.55	565.111	C40 H78 O8 N2 P1	neg	0.00719075	6.423	6.4361	6.4837	6.3968	6.4411	6.4542	6.4323	6.3953	6.4851	6.6348	6.5396	6.6427	6.7205	6.4383	6.2707	6.5402	6.4367	6.4199
SM(d36:1)	SM(d36:1)+HCOO	SP	SM	sphingomyelin	(d36:1)	775.597	689.691	C42 H84 O8 N2 P1	neg	0.0142557	8.6402	8.6597	8.5633	8.6076	8.6251	8.5958	8.5849	8.7011	8.6362	8.6104	8.6464	8.5679	8.6329	8.6106	8.7135	8.5475	8.6551	8.7092
SM(d36:2)	SM(d36:2)+HCOO	SP	SM	sphingomyelin	(d36:2)	773.581	635.403	C42 H82 O8 N2 P1	neg	0.0129057	7.4024	7.3823	7.4293	7.404	7.383	7.3873	7.395	7.5004	7.4506	7.4837	7.4629	7.3981	7.4317	7.4484	7.5005	7.4644	7.4011	7.4267
SM(d38:1)	SM(d38:1)+HCOO	SP	SM	sphingomyelin	(d38:1)	803.628	750.453	C44 H88 O8 N2 P1	neg	0.0141772	7.2862	7.4081	7.3316	7.2662	7.4536	7.1062	7.7613	7.312	7.3345	7.6253	7.3264	7.2545	7.5159	7.3684	7.3119	7.3921	7.3947	7.3153
SM(d36:0)	SM(d36:0)+HCOO	SP	SM	sphingomyelin	(d36:0)	777.613	712.616	C42 H86 O8 N2 P1	neg	0.0327781	6.8996	7.0611	6.8872	6.4228	6.959	6.8276	6.9151	7.1463	6.8422	7.1183	7.0964	7.0313	7.0556	6.9262	6.5998	6.957	6.9535	6.6589
SM(d40:1)	SM(d40:1)+HCOO	SP	SM	sphingomyelin	(d40:1)	831.66	814.19	C46 H92 O8 N2 P1	neg	0.011522	7.6567	7.7743	7.7147	7.6558	7.7286	7.4509	8.0373	7.6839	7.5773	8.1053	7.6129	7.546	7.8057	7.7392	7.4741	7.6761	7.727	7.6676
SM(d40:2)	SM(d40:2)+HCOO	SP	SM	sphingomyelin	(d40:2)	829.644	756.772	C46 H90 O8 N2 P1	neg	0.0842609	6.6705	6.577	6.4801	6.7601	6.5707	6.3783	6.5258	6.5069	6.69	6.9193	6.4883	6.7109	6.5601	6.6553	6.333	6.7352	6.5708	6.5453
SM(d41:1)	SM(d41:1)+HCOO	SP	SM	sphingomyelin	(d41:1)	845.675	848.379	C47 H94 O8 N2 P1	neg	0.00813764	7.0799	7.2445	7.2309	7.0732	7.2149	6.9813	7.4346	7.1885	6.9994	7.3405	7.0844	6.886	7.113	7.2288	6.9332	7.1362	7.194	7.1403
SM(d41:2)	SM(d41:2)+HCOO	SP	SM	sphingomyelin	(d41:2)	843.66	779.702	C47 H92 O8 N2 P1	neg	0.00322903	6.2267	6.5196	6.2769	6.2793	6.41	6.3351	6.2777	6.201	6.2366	6.5525	6.1679	6.1699	6.3577	6.1876	6.1702	6.202	6.4173	6.1242
SM(d42:1)	SM(d42:1)+HCOO	SP	SM	sphingomyelin	(d42:1)	859.691	835.32	C48 H96 O8 N2 P1	neg	0.00452998	6.0405	6.3049	6.0465	6.1354	6.2003	5.8406	6.3875	6.0622	5.7282	6.984	6.1147	6.1821	6.5342	6.0878	5.7708	6.0749	6.0317	6.0297
SM(d42:2)	SM(d42:2)+HCOO	SP	SM	sphingomyelin	(d42:2)	857.675	809.452	C48 H94 O8 N2 P1	neg	0.00985035	7.7895	7.9629	7.7628	7.785	7.8021	7.6039	7.9995	7.7772	7.7275	8.2039	7.6983	7.7402	7.8937	7.7643	7.6149	7.7584	7.7532	7.7352
SM(d42:3)	SM(d42:3)+HCOO	SP	SM	sphingomyelin	(d42:3)	855.66	755.087	C48 H92 O8 N2 P1	neg	0.00589316	7.1592	7.3081	7.1118	7.1141	7.1991	7.0063	7.4091	7.123	7.1127	7.4649	7.0343	7.1937	7.2377	7.1249	7.0419	7.2455	7.0869	7.1382
SM(d43:1)	SM(d43:1)+HCOO	SP	SM	sphingomyelin	(d43:1)	873.707	920.668	C49 H98 O8 N2 P1	neg	0.00806398	6.1939	6.3293	6.2297	5.9924	6.2859	5.992	6.3173	6.136	5.9579	6.3595	6.1051	5.8833	6.0115	6.2816	5.7868	6.1806	6.1551	6.2482
SM(d43:2)	SM(d43:2)+HCOO	SP	SM	sphingomyelin	(d43:2)	871.691	842.82	C49 H96 O8 N2 P1	neg	0.00445187	6.0186	6.3168	6.0362	5.915	6.0885	5.8726	6.2309	6.0104	5.8415	6.2314	5.9128	5.8624	6.132	6.0463	5.7579	5.9761	6.0304	5.9903
SM(d44:2)	SM(d44:2)+HCOO	SP	SM	sphingomyelin	(d44:2)	885.707	877.293	C50 H98 O8 N2 P1	neg	0.0178306	5.8089	6.0355	5.787	5.8691	5.8424	5.4551	6.0539	5.6524	5.51	6.9144	5.9653	5.529	6.2243	5.7813	5.33	5.6812	5.6776	5.6865
SM(d40:0)	SM(d40:0)+HCOO	SP	SM	sphingomyelin	(d40:0)	833.675	839.812	C46 H94 O8 N2 P1	neg	0.00684185	5.9532	6.2543	6.2872	6.1661	6.0748	5.7217	6.5525	6.0179	6.043	7.0929	6.1614	5.6934	6.587	5.9735	5.6671	6.0777	5.9602	6.1379
SQMG(1:0)	SQMG(1:0)-H	SoG1	SQMG	Sulfoquinovosylmonoacylglycerol	(1:0)	345.05	91.9605	C10 H17 O11 S1	neg	0.0634495	6.551	6.2222	6.8527	6.6189	6.0044	6.3829	6.2189	6.8673	7.0089	6.0399	6.9079	6.2888	6.307	6.7256	6.9571	6.476	6.3577	6.3399
SQMG(8:0)	SQMG(8:0)+HCOO	SoG1	SQMG	Sulfoquinovosylmonoacylglycerol	(8:0)	489.165	81.8912	C18 H33 O13 S1	neg	0.0101392	6.6981	6.744	7.0327	6.7279	5.2066	6.3277	6.7095	6.8697	7.9858	6.0249	6.8372	7.033	7.5507	6.7041	7.1746	6.6413	6.3327	5.9067
ST(m39:3)	ST(m39:3)-H	SP	ST	Sulfatide	(m39:3)	828.567	586.04	C45 H82 O10 N1 S1	neg	0.00723911	7.2556	7.1843	7.3434	7.2659	7.2148	7.1535	7.2182	7.204	7.3916	7.1605	7.3114	7.3901	7.1941	7.2922	7.4674	7.005	7.2454	7.289

## Sheet: Table S4
Table S4. DELs of LD muscle in CT vs SeD
Index	CT-1	CT-2	CT-3	CT-4	CT-5	CT-6	SD-1	SD-2	SD-3	SD-4	SD-5	SD-6	VIP	P-value	Type
Cer(m19:0/22:2)	7.127	7.6528	7.2273	7.257	7.2722	7.1278	7.0455	7.0782	7.0854	7.0882	6.8242	7.1963	2.10822	0.0423361	down
Cer(m19:0/21:2)	5.4799	6.1216	5.6985	6.7735	5.5284	5.3275	5.3739	4.9773	5.2453	5.0872	4.9385	5.5698	1.94083	0.0369564	down
Cer(m19:0/24:2)	6.4082	6.7468	6.5559	6.5427	6.5881	6.3624	6.308	6.2992	6.0316	6.3553	6.1316	6.4544	2.43399	0.00950034	down
Cer(d44:5)	6.9142	7.0893	6.957	7.1087	7.0625	6.8863	6.6617	6.9719	6.8506	6.8557	6.7006	7.0099	2.05849	0.045179	down
Co(Q10)	6.9827	6.6072	7.0421	7.1826	6.8315	6.8363	6.5913	6.8957	6.4109	6.5125	6.3302	6.7373	2.13591	0.0181231	down
DG(18:2/18:2)	7.6151	8.3162	7.6925	7.6496	7.6878	7.4856	7.4447	7.5	7.3376	7.3023	7.1776	7.4476	2.17524	0.024504	down
DG(18:0/22:4)	6.5317	6.8047	6.5648	6.8387	6.6293	6.6327	6.6929	6.5732	6.354	6.3437	6.2197	6.5664	2.02505	0.0448218	down
LPC(35:1)	8.272	8.1125	8.349	8.1497	8.3809	8.228	8.1854	8.1517	8.1052	8.0912	7.7378	7.8911	2.15381	0.0284518	down
LPC(36:1)	7.6503	8.0958	7.5612	7.4878	7.7775	7.6006	7.337	7.5827	7.411	7.5556	7.1792	7.5655	2.06161	0.0449339	down
PC(33:0)	7.5284	7.9096	7.6251	7.6848	7.7229	7.4594	7.3012	7.5549	7.43	7.482	7.0963	7.4006	2.31143	0.0132597	down
PC(33:0e)	7.5966	7.6555	7.5099	7.3897	7.7872	7.542	7.2775	7.4082	7.4488	7.4947	7.0201	7.2799	2.28933	0.016905	down
PC(33:1e)	7.9902	8.0964	8.2742	7.9389	8.0273	7.8594	7.9129	7.3725	7.7983	7.9083	7.502	7.2861	2.0869	0.0150452	down
PC(34:3e)	6.5846	5.8695	5.9725	5.3825	5.9409	6.0042	5.3471	5.6378	5.2843	5.6865	5.2093	5.5869	2.07584	0.0234472	down
PC(36:0e)	6.465	6.9422	6.5817	6.8406	6.8689	6.4883	6.335	6.4935	6.4116	6.6304	6.2054	6.4809	2.14254	0.0289609	down
PC(37:5e)	8.0667	8.0404	8.3099	8.1148	8.1962	8.0893	8.0621	8.1718	7.9184	7.9538	7.6381	7.8438	2.1052	0.044582	down
PC(23:0/11:1)	7.7293	8.4621	8.1953	8.3706	8.3266	8.2404	8.0205	7.6023	8.0096	7.5743	7.2301	7.9388	2.37731	0.0150359	down
PC(25:1/11:2)	7.6964	8.0106	7.7656	7.7455	7.7773	7.5798	7.2137	7.7127	7.5679	7.5331	7.2028	7.7433	2.11207	0.0445496	down
PC(30:1e)	7.4887	7.4104	7.4634	7.4484	7.4491	7.3462	7.4247	7.3843	7.3289	7.2569	7.1336	7.3041	2.17799	0.0271049	down
PC(31:0)	7.8006	8.0728	7.8242	7.7966	7.8786	7.6442	7.4804	7.7037	7.6962	7.7809	7.3134	7.4101	2.10356	0.0189255	down
PE(18:0p/16:0)	7.1255	7.1351	7.0846	7.6154	7.2045	7.0401	6.8634	6.9807	6.8309	6.9431	6.5588	7.1602	2.14668	0.0250499	down
PE(39:2e)	7.4438	7.1938	7.4758	7.4598	7.5889	7.4456	7.2026	7.4345	7.186	7.2616	6.9615	7.3858	2.12262	0.049074	down
PS(16:2e/23:0)	6.5845	6.6549	6.7137	6.5228	6.8752	6.6524	6.1142	6.5892	6.4579	6.5435	6.0436	6.4281	2.35055	0.0214882	down
SM(d20:0/23:4)	7.328	7.3786	7.3715	7.4243	7.4244	7.2671	7.2345	7.176	7.088	7.0962	6.8482	7.2739	2.63582	0.00876432	down
SM(d18:1/24:3)	8.0713	8.1404	8.0575	8.5319	8.132	7.9975	7.9727	8.0355	7.7453	7.8072	7.596	8.0009	2.1469	0.0188443	down
SM(d20:1/24:3)	7.9584	7.9926	8.0601	8.3591	8.089	7.9302	7.8677	7.8916	7.7471	7.7879	7.5132	7.9463	2.33295	0.0124461	down
SM(d42:0)	6.8861	7.0265	7.2675	7.7007	7.0043	6.9983	6.9188	6.8295	6.7899	6.8892	6.4891	6.8321	2.02521	0.0338723	down
SM(d44:3)	6.6581	6.9374	6.6873	7.3497	6.69	6.5858	6.6037	6.6755	6.4205	6.4941	6.2625	6.5478	1.86303	0.0441797	down
SM(d34:1)	9.547	9.7936	9.5549	9.4901	9.4677	9.3857	9.3579	9.4603	9.3038	9.0996	8.9361	9.515	2.16319	0.0387251	down
TG(12:1e/6:0/20:5)	7.1844	7.4851	7.0469	7.2519	7.1933	7.0841	6.89	7.23	6.9127	6.9029	6.8284	7.1488	1.98538	0.0362141	down
TG(8:0/18:2/20:5)	5.8695	5.6585	6.281	6.0165	5.6326	5.7225	5.8849	6.206	6.2333	6.1382	6.4397	6.0948	2.01558	0.0397667	up
WE(47:10)	6.902	7.0691	7.0128	6.9725	7.1002	6.9234	6.8187	6.8911	6.8616	6.9197	6.5364	6.8626	2.39678	0.0250793	down
Cer(d18:2/18:0)	6.9165	7.0608	6.9373	7.1553	7.1074	6.9651	7.0241	7.2415	7.2286	7.1911	7.2276	7.0711	2.03711	0.0292599	up
PC(16:1/18:1)	9.4375	9.3122	9.3417	9.3321	9.3052	9.3632	9.4529	9.421	9.4322	9.531	9.3848	9.4132	2.13942	0.00979522	up
PC(18:0e/16:0)	7.0293	7.5302	7.3025	7.1926	7.31	7.2193	6.9134	7.0027	7.0259	7.0454	7.0071	6.9389	2.39773	0.0081632	down
PC(18:2e/22:5)	7.0319	6.742	6.7861	6.8436	6.7643	6.6939	6.6342	6.7353	6.6751	6.6397	6.6472	6.4947	1.69631	0.0167837	down
PE(16:1e/20:3)	7.246	7.0918	7.2253	7.2721	7.2156	7.2937	7.229	7.37	7.2466	7.3695	7.328	7.3367	1.79163	0.0424149	up
PE(18:1e/16:0)	6.6406	6.9803	6.7002	7.3217	6.783	6.7298	6.6547	6.4856	6.5013	6.4264	6.5913	6.6396	1.90804	0.029689	down
PE(22:0/18:2)	5.6873	5.9927	5.9012	6.0886	5.9616	5.9082	5.8419	5.657	5.6845	5.5201	5.809	5.905	1.88747	0.0409861	down
SM(d41:1)	6.9813	7.4346	7.2149	7.3405	7.2288	7.194	7.2309	6.886	6.9994	6.9332	7.1362	7.0732	1.77588	0.0440646	down
SM(d41:2)	6.3351	6.2777	6.41	6.5525	6.1876	6.4173	6.2769	6.1699	6.2366	6.1702	6.202	6.2793	1.80498	0.041039	down
SM(d43:1)	5.992	6.3173	6.2859	6.3595	6.2816	6.1551	6.2297	5.8833	5.9579	5.7868	6.1806	5.9924	1.80478	0.030261	down
SM(d43:2)	5.8726	6.2309	6.0885	6.2314	6.0463	6.0304	6.0362	5.8624	5.8415	5.7579	5.9761	5.915	1.91254	0.0243062	down
SQMG(1:0)	6.3829	6.2189	6.0044	6.0399	6.7256	6.3577	6.8527	6.2888	7.0089	6.9571	6.476	6.6189	1.76485	0.0273095	up
SQMG(8:0)	6.3277	6.7095	5.2066	6.0249	6.7041	6.3327	7.0327	7.033	7.9858	7.1746	6.6413	6.7279	2.03404	0.015329	up

## Sheet: Table S5
Table S5. DELs of LD muscle in CT vs SY3
Index	CT-1	CT-2	CT-3	CT-4	CT-5	CT-6	SY5-1	SY5-2	SY5-3	SY5-4	SY5-5	SY5-6	VIP	P-value	Type
AcCa(20:1)	6.921	6.7458	6.4826	6.7961	6.5321	5.9585	7.7604	6.8931	7.339	7.0635	6.4871	7.127	1.73397	0.0377867	up
Cer(d18:2/26:0)	6.2685	6.2287	6.4687	6.3911	6.4012	6.3775	6.291	6.3515	6.1068	6.0578	6.222	6.198	1.65094	0.0267327	down
Cer(d22:0/18:0)	6.8538	7.2567	7.0574	7.1686	6.946	6.868	6.784	6.9889	6.7996	6.6731	6.8739	6.919	1.58597	0.0490079	down
CL(78:6)	8.127	8.0093	8.4903	8.0215	8.3524	8.3111	8.0559	8.1376	7.9671	7.8178	7.9285	8.0553	1.63913	0.0407165	down
DG(36:4e)	8.1404	7.6487	8.0607	7.9519	8.0213	8.0698	8.1619	8.3014	8.0538	8.128	8.2034	8.19	1.9148	0.0454006	up
DG(38:4e)	6.7515	6.8592	6.7599	6.7761	6.9277	6.7362	6.8958	6.9757	6.8445	6.8198	6.9755	7.0267	1.91166	0.0239736	up
PC(17:1/20:1)	7.5646	7.2993	7.3507	7.4282	7.4864	7.3781	7.5235	7.6874	7.5319	7.6996	7.6112	7.5724	2.3435	0.00434999	up
PC(32:3e)	7.5337	7.4348	7.6293	7.3463	7.4871	7.3511	7.8113	7.8437	7.7267	7.5063	7.6301	7.7039	2.2502	0.00528869	up
PC(42:11)	6.6268	6.6129	6.6623	6.3763	6.4919	6.5679	6.9467	6.8652	6.5894	6.6401	6.7506	6.5802	1.66201	0.0491344	up
PC(22:2/11:1)	6.6361	6.6392	6.4561	6.4256	6.4048	6.3872	6.8839	6.9289	6.832	6.552	6.6421	6.5051	1.95032	0.0275764	up
PC(22:4/14:1)	9.1363	8.9188	9.15	8.811	9.2208	8.994	8.8967	8.9173	8.9954	8.8959	8.6313	8.7557	1.52508	0.0474654	down
PC(23:0/11:2)	7.4376	7.2031	7.3831	7.2786	7.3021	7.2983	7.4989	7.8548	7.8155	7.376	7.5408	7.5395	2.2956	0.0117251	up
PC(33:3)	8.454	8.2106	8.3514	8.389	8.2573	8.2952	8.5868	8.6313	8.2156	8.4718	8.5321	8.5041	1.84029	0.046083	up
PE(14:0p/20:4)	6.822	6.5279	6.7145	6.7174	6.6261	6.4779	6.943	7.0279	6.9584	6.822	6.8134	6.8865	2.46566	0.00274665	up
PE(18:0p/22:4)	8.4762	8.3061	8.5285	8.5935	8.5692	8.4095	8.6094	8.7846	8.5202	8.5371	8.7035	8.6708	2.03689	0.0269003	up
PE(18:1p/22:6)	7.8611	7.4806	7.7522	7.5254	7.3915	7.7216	7.8464	8.1958	7.8427	7.8583	7.7944	7.7935	2.01305	0.0213589	up
PE(18:2e)	7.2224	7.11	7.161	6.9338	7.358	7.1657	7.392	7.3358	7.2778	7.3554	7.274	7.4953	1.9443	0.0173612	up
PE(16:0p/22:4)	8.8075	8.4864	8.7495	8.7774	8.7908	8.6791	8.8998	8.9202	8.8512	8.7929	8.8753	8.9417	2.17931	0.0186603	up
PE(16:0p/22:5)	7.2689	7.0247	7.2804	7.0687	7.1028	7.1443	7.3591	7.6293	7.3073	7.2797	7.2802	7.2333	2.07383	0.0222716	up
PE(16:0p/20:2)	8.2187	8.0643	8.0837	7.8778	8.2556	8.0446	8.2056	8.5267	8.2146	8.1679	8.2277	8.2856	1.94444	0.0407683	up
PE(40:9e)	7.0857	6.7689	6.9736	6.9863	6.7388	6.8236	7.0392	7.4218	7.2779	7.2112	7.0539	7.1481	2.32144	0.00475819	up
PE(39:2e)	7.4438	7.1938	7.4758	7.4598	7.5889	7.4456	7.5818	7.6534	7.4471	7.5243	7.7019	7.6297	1.86046	0.0410242	up
PE(18:0p/20:4)	8.1365	7.9952	8.2404	8.2514	7.7961	8.174	8.2012	8.4746	8.2104	8.3078	8.4595	8.3633	1.90293	0.0228669	up
phSM(t39:7)	6.8906	6.8499	7.3443	6.8788	7.0956	7.0543	7.0049	6.8769	6.4241	6.2345	6.2845	6.9266	1.64721	0.0421531	down
SM(d19:0/21:4)	7.5918	7.9085	7.789	7.821	7.7633	7.7221	7.5935	7.7281	7.5666	7.5023	7.605	7.5433	2.01245	0.00915406	down
SM(t18:0/16:1)	7.3462	7.4361	7.2868	7.4828	7.3508	7.161	7.5412	7.4867	7.5425	7.3647	7.4406	7.492	1.85093	0.0373718	up
SM(d36:5)	6.6397	6.6781	6.7838	6.7724	6.7385	6.6059	6.9337	7.0818	6.7433	6.8154	6.7494	6.8842	1.99704	0.0260237	up
TG(16:0/17:0/18:1)	8.2015	8.2027	8.2225	8.0457	8.1714	8.2554	7.9775	7.935	7.8889	8.0361	8.1641	8.1	2.11558	0.0105665	down
TG(16:0/18:1/20:5)	9.1889	9.2033	9.2912	9.2092	9.346	9.444	8.9763	9.047	8.912	9.209	9.309	8.9602	1.95129	0.0224267	down
TG(18:0/16:0/18:1)	6.7426	6.9268	6.1736	6.2481	6.5356	6.5369	7.1878	6.8155	7.0793	6.6973	6.7881	6.855	1.7809	0.0255527	up
TG(19:1/16:0/18:1)	8.7966	8.8245	8.8525	8.6365	8.8157	8.8855	8.6595	8.5575	8.5969	8.7194	8.8093	8.6867	1.96369	0.0284727	down
TG(20:3e/14:4/19:1)	8.1849	8.0751	8.4071	8.0399	8.3413	8.25	7.9913	8.0632	7.6171	8.014	8.1421	7.905	1.80439	0.0220315	down
TG(22:0/11:2/24:1)	8.686	8.5618	8.69	8.5478	8.6359	8.7691	8.5621	8.4782	8.4041	8.4905	8.6076	8.4718	2.05626	0.0093413	down
TG(27:1/10:1/18:2)	8.4737	8.7193	8.5266	8.6011	8.4447	8.6684	8.4761	8.2819	8.4642	8.496	8.3829	8.4942	2.05986	0.0341983	down
TG(28:1/10:0/18:1)	7.7282	7.7213	7.9913	7.5764	7.8189	7.8285	7.5162	7.5242	7.5568	7.4881	7.6796	7.6645	2.02919	0.0136553	down
TG(41:9)	8.5028	8.3427	8.787	8.5153	8.6238	8.6295	8.4245	8.5153	8.4321	8.1736	8.393	8.3891	1.52682	0.044333	down
TG(18:3e/18:4/19:0)	8.3882	8.3633	8.5862	8.4792	8.4944	8.6081	8.2352	8.4335	8.0927	8.3261	8.3442	8.4849	1.66188	0.0419446	down
Cer(d44:1)	5.5382	5.8064	5.8076	5.9713	5.5686	5.6788	5.6438	5.4248	5.5919	5.4761	5.6314	5.445	1.87997	0.0383754	down
Cer(d46:0)	6.0418	5.9895	6.1512	6.0704	6.1831	6.0224	6.0424	5.7735	5.9231	5.8978	5.9394	5.9963	2.02392	0.0132736	down
Cer(d48:0)	5.7915	5.7959	5.967	5.8769	5.8747	5.7999	5.8153	5.6533	5.783	5.6881	5.7343	5.729	2.05624	0.0106354	down
Cer(m44:0)	5.7435	5.9746	5.8274	5.9606	5.7726	5.7644	5.715	5.6262	5.6024	5.6203	5.6822	5.651	2.32832	0.00437944	down
Cer(m46:0)	5.7312	5.7094	5.7473	5.798	5.783	5.6926	5.6306	5.507	5.5547	5.5339	5.4908	5.5508	2.57925	2.10581e-05	down
Cer(t18:0/24:0)	5.7458	6.2396	6.0875	6.1033	5.9243	5.9719	5.8015	5.9185	5.7504	5.7493	5.8706	5.8454	1.85285	0.0418785	down
Cer(t18:0/26:0)	5.9031	6.0076	6.0844	6.0864	5.9797	5.9307	5.8018	5.645	5.868	5.7687	5.8584	5.7904	2.43115	0.000938976	down
Cer(t44:0)	5.696	5.8385	5.9598	5.9481	5.9407	5.8385	5.7851	5.5845	5.827	5.7766	5.7352	5.739	1.91227	0.0379946	down
Cer(t45:0)	5.7324	5.7498	5.9028	5.8265	5.7696	5.7419	5.6906	5.588	5.6075	5.5887	5.6396	5.629	2.44359	0.000759072	down
Cer(t46:0)	5.8466	5.905	6.0659	5.9384	5.9493	5.8979	5.8454	5.6864	5.7459	5.755	5.7937	5.8055	2.38477	0.0018967	down
Cer(t46:1)	5.7438	5.8641	5.8922	5.9685	5.7979	5.7719	5.7862	5.5368	5.7672	5.4109	5.7175	5.7653	1.76128	0.0409385	down
Cer(t46:1+O)	5.7366	5.8442	5.9875	6.0423	5.9255	5.8708	5.8439	5.6868	5.7993	5.7482	5.7068	5.8218	1.90365	0.0319096	down
Cer(d19:0/25:1)	5.7975	6.3967	6.0119	6.1948	5.9616	5.8571	5.7962	5.7018	5.8231	5.7581	5.8619	5.7811	1.94283	0.0404601	down
CL(76:11)	5.8458	5.9264	5.9284	6.4238	5.9194	6.0791	6.4189	6.2208	6.1685	6.5042	6.4637	6.1057	1.68584	0.0252433	up
DGDG(28:1e)	6.6533	6.6765	6.7792	6.6538	6.9231	6.6952	6.5942	6.5389	6.4985	6.5246	6.4359	6.4691	2.27869	0.00221923	down
GM2(d34:5)	6.9211	6.8933	7.1382	6.9041	7.0303	6.9547	6.8784	6.7709	6.8523	6.8405	6.8656	6.8263	2.0901	0.0156378	down
PC(14:0/18:2)	7.274	7.0794	6.9578	6.9475	6.8559	7.0009	7.1902	7.2244	7.2757	7.2707	7.1113	7.1177	1.90042	0.0286228	up
PC(15:0/18:2)	7.3733	7.301	7.1502	7.1876	7.1889	7.2876	7.3365	7.3965	7.4878	7.3438	7.349	7.3581	2.03925	0.0132577	up
PC(19:3)	5.8053	5.5921	6.0693	5.8884	5.5675	5.9267	5.7777	5.6072	5.5422	5.4079	5.4621	5.5284	1.79939	0.0276525	down
PC(8:0/11:1)	6.52	6.334	6.6948	6.6045	6.5275	6.7236	6.6343	6.3166	6.2768	6.2607	6.2316	6.2431	1.91669	0.0183126	down
PE(18:1e/22:4)	7.0083	6.9858	7.2296	7.2396	7.0357	7.1929	7.0813	7.411	7.1968	7.4212	7.5168	7.5208	1.84844	0.0226163	up
PE(18:3e/20:4)	7.8583	7.7305	7.7907	7.9234	7.754	7.6936	7.7598	7.9662	7.8931	8.0474	7.9301	7.8666	1.78748	0.0487271	up
PG(18:1/18:1)	7.2939	7.1054	7.0807	7.1725	6.9742	7.106	7.3041	7.5596	7.206	7.3255	7.265	7.2187	2.07729	0.0195306	up
PG(18:1/18:2)	6.2753	6.1564	5.9273	6.0833	6.123	6.1059	6.3752	6.4697	6.3348	6.3035	6.1841	6.2955	2.26768	0.00525499	up
PIP2(37:2e)	7.0279	6.9057	7.2917	7.0944	7.2977	7.1793	6.8059	6.7752	6.9344	6.7378	6.968	6.9644	2.07956	0.00653856	down
PS(16:1e/20:4)	7.2434	7.1675	7.3605	7.1447	7.4643	7.2673	7.1787	7.0713	7.1722	7.1047	7.1055	7.1065	1.89486	0.0261775	down
PS(16:1e/24:2)	6.8092	6.8223	6.8364	6.7399	6.9399	6.8537	6.6762	6.7572	6.77	6.5789	6.8021	6.7582	1.64683	0.0292908	down
PS(18:0/18:2)	6.7083	6.7809	6.8128	6.7287	6.7889	6.8828	6.9453	6.9376	6.8868	7.014	6.7661	6.8084	1.52701	0.0403997	up
PS(20:3/18:2)	7.2426	7.089	7.2546	7.0121	7.102	7.1252	7.0748	6.9973	6.8681	7.0315	7.0033	6.9772	1.92907	0.0134783	down
PS(38:7e)	7.1973	7.1918	7.4264	7.3363	7.2698	7.1836	7.1228	7.225	7.1603	7.1089	7.0608	7.054	1.82944	0.0144351	down
PS(44:9)	6.8892	6.9365	6.9907	6.8948	6.9407	6.9155	6.9044	6.8817	6.7779	6.753	6.7833	6.8039	2.1116	0.00511054	down
SQMG(8:0)	6.3277	6.7095	5.2066	6.0249	6.7041	6.3327	7.2959	6.4027	6.744	6.7193	6.9753	7.14	1.65823	0.0363098	up

## Sheet: Table S6
Table S6. DELs of LD muscle in SeD vs SY3
Index	SD-1	SD-2	SD-3	SD-4	SD-5	SD-6	SY3-1	SY3-2	SY3-3	SY3-4	SY3-5	SY3-6	VIP	P-value	Type
Cer(m19:0/22:2)	7.0455	7.0782	7.0854	7.0882	6.8242	7.1963	7.2274	7.3206	7.1508	7.2398	7.2568	7.2741	1.89966	0.0103786	up
Cer(m19:0/21:2)	5.3739	4.9773	5.2453	5.0872	4.9385	5.5698	6.0948	6.6167	5.9562	5.3987	6.2954	6.0143	2.06973	0.00191572	up
Cer(m19:0/24:2)	6.308	6.2992	6.0316	6.3553	6.1316	6.4544	6.4352	6.467	6.4205	6.4431	6.5572	6.3013	1.50194	0.0423231	up
Cer(m20:1/18:1)	7.0107	6.9406	7.0616	7.0042	6.7622	7.0681	7.0436	7.2351	7.0006	7.345	7.139	7.1191	1.55679	0.0325684	up
Cer(m19:0/23:2)	7.6998	7.7365	7.7082	7.6821	7.4344	7.7202	7.8517	7.9027	7.7398	7.8359	7.9117	7.7192	1.7734	0.0185779	up
Co(Q10)	6.5913	6.8957	6.4109	6.5125	6.3302	6.7373	6.8773	7.0086	6.6069	6.8981	6.9097	7.0661	1.68322	0.0161272	up
DG(36:2e)	7.4893	7.4298	6.926	6.8661	7.0231	7.4674	6.6559	6.5977	6.9277	7.1304	6.5864	6.7279	1.54476	0.0172765	down
DG(38:4e)	6.7016	6.7109	6.504	6.5935	6.5473	6.9397	6.8958	6.9757	6.8445	6.8198	6.9755	7.0267	1.85658	0.00834217	up
DG(38:6e)	6.7237	6.6883	6.7002	6.6398	6.4106	6.9861	6.9714	7.1534	6.6793	6.9082	7.0361	6.9375	1.74051	0.0274937	up
DG(25:2)	6.8749	6.5158	6.9586	6.747	6.845	6.6758	6.7922	6.5941	6.5553	6.3145	6.4705	6.4801	1.35037	0.0281577	down
DG(18:2/18:2)	7.4447	7.5	7.3376	7.3023	7.1776	7.4476	7.3771	7.5239	7.6202	7.5762	7.6983	7.4433	1.55887	0.0309048	up
LPC(37:1)	7.5041	7.2666	7.3276	7.2731	7.0921	6.9511	7.4245	7.4122	7.5075	7.3301	7.6948	7.622	1.56256	0.0233749	up
LPC(36:1)	7.337	7.5827	7.411	7.5556	7.1792	7.5655	7.732	7.6226	7.5049	7.714	7.8127	7.7667	1.72554	0.0113479	up
PA(18:1e)	5.9133	6.3748	6.67	6.7356	5.3835	6.6617	6.2961	5.895	5.3635	5.3624	5.5804	5.4326	1.14	0.0419967	down
PC(16:0/13:0)	5.737	5.9147	5.789	6.0227	5.5982	5.5735	6.1563	6.2294	6.1222	6.0264	6.0852	6.0163	1.81832	0.00388467	up
PC(17:1/20:1)	7.3582	7.4909	7.3682	7.2613	7.1973	7.5262	7.5235	7.6874	7.5319	7.6996	7.6112	7.5724	1.90285	0.00420243	up
PC(20:1e/12:1)	7.624	7.5595	7.6469	7.6696	7.2959	7.7479	7.9553	7.8825	7.8282	7.8714	7.8399	7.6826	1.8239	0.00913295	up
PC(32:3e)	7.4838	7.4784	7.4765	7.4506	7.0671	7.5864	7.8113	7.8437	7.7267	7.5063	7.6301	7.7039	1.81785	0.0124195	up
PC(33:0)	7.3012	7.5549	7.43	7.482	7.0963	7.4006	7.8304	7.7753	7.7044	7.4779	7.6814	7.7531	1.88911	0.00317901	up
PC(33:0e)	7.2775	7.4082	7.4488	7.4947	7.0201	7.2799	7.566	7.495	7.6932	7.3753	7.7703	7.5606	1.63798	0.0190571	up
PC(34:4e)	6.5053	7.381	6.947	7.3912	7.0461	7.3732	7.5038	7.783	7.6647	7.48	7.6178	7.6972	1.63859	0.0138429	up
PC(34:5e)	6.8368	7.0142	6.9304	6.7911	6.4039	6.8935	7.0481	7.3545	7.1809	6.9329	7.1156	7.0979	1.78307	0.0165913	up
PC(36:0e)	6.335	6.4935	6.4116	6.6304	6.2054	6.4809	6.7127	6.7397	6.442	6.5535	6.8747	6.8335	1.72493	0.0146826	up
PC(36:2e)	8.738	8.9935	8.4561	8.5277	8.2449	8.7238	8.8831	9.2448	8.9426	8.8418	9.0663	9.0014	1.79133	0.0142038	up
PC(37:1)	6.8019	6.9746	6.9023	6.7881	6.6369	6.9207	7.1144	7.2235	6.805	7.097	7.0727	7.0294	1.74484	0.0158913	up
PC(38:2e)	7.5617	7.7606	7.5937	7.7306	7.437	7.8747	7.8555	7.9043	7.6289	7.8797	7.9901	8.025	1.61021	0.0284302	up
PC(38:4e)	9.0613	9.0744	8.9251	9.0513	8.8034	9.2613	9.2183	9.2337	9.2715	9.1982	9.3743	9.3839	1.84708	0.00860264	up
PC(40:1)	6.1821	6.3665	5.8977	6.0536	5.6935	5.8739	6.4949	6.8369	6.3589	6.2832	6.8062	6.5385	1.9483	0.00250646	up
PC(40:3e)	6.6465	7.0339	6.4691	6.762	6.7846	6.6797	7.0565	7.2914	6.9988	7.0383	7.1726	7.4393	1.78993	0.00178436	up
PC(40:4)	7.5637	7.7288	7.4737	7.5099	7.4178	7.6786	7.7564	7.8981	7.785	7.855	7.8924	8.0357	1.97939	0.000758767	up
PC(40:4e)	7.9773	7.8767	7.7008	7.7802	7.5317	7.8019	7.9701	7.9855	7.8692	7.9618	8.1832	8.3385	1.68723	0.0164359	up
PC(40:8e)	7.246	7.4618	7.4448	7.0179	6.8205	7.3828	7.4563	8.0528	7.498	7.3954	7.4824	7.5178	1.61911	0.0416824	up
PC(8:1e/24:0)	8.5247	8.4736	8.4441	8.4062	8.1614	8.5864	8.7298	8.705	8.8095	8.4545	8.8563	8.7704	1.88675	0.00613812	up
PC(23:0/11:1)	8.0205	7.6023	8.0096	7.5743	7.2301	7.9388	8.3181	8.4116	8.3152	8.3938	8.4808	8.3645	2.08638	0.00342557	up
PC(23:0/11:2)	7.3593	7.6054	7.1988	7.292	6.9464	7.5414	7.4989	7.8548	7.8155	7.376	7.5408	7.5395	1.49797	0.0495431	up
PC(28:0)	6.0345	6.3771	6.2044	5.9611	6.0107	6.3087	6.4971	6.4067	6.3991	6.288	6.2086	6.3885	1.51277	0.0294255	up
PC(30:0e)	7.8918	7.9721	8.0208	8.0377	7.6865	7.995	8.3145	8.1251	8.2034	8.0077	8.0637	8.1034	1.63275	0.0163133	up
PC(30:1e)	7.4247	7.3843	7.3289	7.2569	7.1336	7.3041	7.7238	7.6468	7.669	7.3077	7.4942	7.6486	1.8301	0.00564911	up
PC(31:0)	7.4804	7.7037	7.6962	7.7809	7.3134	7.4101	7.9892	8.0822	7.8741	7.767	7.76	7.8386	1.73032	0.00747418	up
PC(38:7e)	8.1645	8.3819	8.0881	7.9283	7.7257	8.2983	8.4705	8.9287	8.4179	8.355	8.5782	8.3944	1.86767	0.00902863	up
PE(14:0p/20:4)	6.5866	6.7563	6.5038	6.5073	6.204	6.7003	6.943	7.0279	6.9584	6.822	6.8134	6.8865	1.94525	0.00421923	up
PE(18:0p/22:4)	8.3082	8.4436	8.2785	8.2752	8.1193	8.5427	8.6094	8.7846	8.5202	8.5371	8.7035	8.6708	2.02365	0.00225494	up
PE(18:0p/22:5)	8.3932	8.4898	8.3858	8.3033	8.053	8.6091	8.5498	8.7213	8.5885	8.4967	8.637	8.6235	1.76411	0.0290709	up
PE(18:1p/22:5)	7.8675	8.0104	7.7803	7.6884	7.4614	8.254	8.0921	8.4453	8.1713	8.1026	8.1435	8.1196	1.71114	0.0292051	up
PE(18:1p/22:6)	7.4865	7.6291	7.5137	7.3296	7.1654	7.9679	7.8464	8.1958	7.8427	7.8583	7.7944	7.7935	1.75172	0.0199553	up
PE(18:2p/18:2)	8.1054	7.9892	8.1496	8.0339	7.7803	8.2805	8.3042	8.3979	8.1679	8.2113	8.2353	8.3731	1.78606	0.0216743	up
PE(18:2p/20:4)	8.5313	8.4412	8.4348	8.375	8.1772	8.7451	8.6803	8.9395	8.6226	8.634	8.6256	8.5899	1.67666	0.0344471	up
PE(16:0e/22:4)	7.8564	7.9677	8.0792	7.96	7.7441	8.2856	8.1531	8.4031	8.1321	8.1049	8.1492	8.2066	1.61406	0.0450567	up
PE(16:0p/22:4)	8.6796	8.685	8.7066	8.6457	8.41	8.928	8.8998	8.9202	8.8512	8.7929	8.8753	8.9417	1.76986	0.0276647	up
PE(18:0p/16:0)	6.8634	6.9807	6.8309	6.9431	6.5588	7.1602	7.1737	7.5244	7.2155	7.0166	7.6016	7.2276	1.90047	0.0080873	up
PE(18:0p/18:1)	8.2882	8.3499	8.2217	8.2943	7.9489	8.5623	8.5402	8.7453	8.4332	8.3882	8.6386	8.587	1.80294	0.0197302	up
PE(40:9e)	6.9194	7.1754	6.7212	6.4227	6.3045	7.0056	7.0392	7.4218	7.2779	7.2112	7.0539	7.1481	1.67402	0.0249831	up
PE(37:1e)	7.3455	7.4948	7.5728	7.5308	7.1898	7.6859	7.763	7.7949	7.6862	7.5618	7.8578	7.8551	1.85903	0.00980037	up
PE(39:2e)	7.2026	7.4345	7.186	7.2616	6.9615	7.3858	7.5818	7.6534	7.4471	7.5243	7.7019	7.6297	2.01534	0.00220987	up
PE(18:0p/22:2)	6.6723	6.579	6.2209	6.6358	6.2846	6.6361	6.6707	7.0487	6.6953	6.6323	6.9722	6.911	1.73766	0.0155497	up
PI(14:1e/22:1)	6.5283	6.1293	6.5066	6.0599	6.0328	6.5793	6.911	6.9906	6.5411	6.3	6.7381	6.6379	1.73679	0.0271424	up
PIP(17:1/18:0)	7.2745	7.1895	8.2584	8.1259	7.5121	8.1919	7.3422	7.3878	7.1825	7.105	7.208	7.2356	1.27609	0.0486809	down
PS(16:2e/23:0)	6.1142	6.5892	6.4579	6.5435	6.0436	6.4281	6.6622	6.5414	6.5402	6.4952	6.7899	6.6672	1.50733	0.0434114	up
SM(d20:0/23:4)	7.2345	7.176	7.088	7.0962	6.8482	7.2739	7.4562	7.543	7.2459	7.3942	7.5319	7.4956	2.03699	0.00212882	up
SM(d34:0)	7.8383	7.8631	7.3063	7.9736	7.7024	8.0424	8.1897	8.2887	8.1471	7.9957	7.9918	8.1155	1.52935	0.0254803	up
SM(d18:1/24:3)	7.9727	8.0355	7.7453	7.8072	7.596	8.0009	8.3743	8.4052	8.0147	8.2538	8.4141	8.2441	2.03162	0.00113877	up
SM(d20:1/24:3)	7.8677	7.8916	7.7471	7.7879	7.5132	7.9463	8.2174	8.314	7.9952	8.0923	8.2937	7.8984	1.93815	0.00430605	up
SM(d33:1)	7.1679	7.1209	7.2854	7.0178	6.7569	7.1657	7.4026	7.5767	7.2551	7.1898	7.293	7.3447	1.77833	0.0210552	up
SM(d18:2/24:1)	6.1783	6.104	6.125	6.0721	5.7627	6.4099	6.6796	7.1599	6.4306	6.3351	7.0124	6.5361	1.99358	0.00574068	up
SM(d42:0)	6.9188	6.8295	6.7899	6.8892	6.4891	6.8321	7.2308	7.4387	7.0257	6.9782	7.4763	7.0758	1.99317	0.00396487	up
SM(d43:5)	6.3982	6.5629	6.4687	6.2438	6.2863	6.3647	6.9618	6.9466	6.4867	6.4974	6.7678	6.7007	1.85288	0.00847394	up
SM(d44:3)	6.6037	6.6755	6.4205	6.4941	6.2625	6.5478	6.9402	7.334	6.8254	6.764	7.1536	6.8814	2.05554	0.00159004	up
SM(d44:4)	6.2051	6.2481	6.3061	6.0366	6.149	6.4524	6.0742	7.1299	6.4427	6.8342	6.9495	6.5486	1.60983	0.0400851	up
SM(d34:1)	9.3579	9.4603	9.3038	9.0996	8.9361	9.515	9.807	9.8883	9.6179	9.5591	9.542	9.5869	1.89048	0.00623917	up
SM(d35:1)	8.128	8.0026	7.9847	7.9779	7.5778	7.9479	8.2985	8.4211	8.1786	7.9991	8.0576	8.1642	1.64086	0.0307511	up
SM(d18:1/24:4)	6.7179	6.9622	6.7377	6.7158	6.6408	7.0956	7.0824	7.1989	7.0231	7.0956	7.1104	7.1831	1.90065	0.00670203	up
SM(d18:2/22:1)	6.5005	6.0947	5.894	6.02	5.7655	6.6454	6.7593	7.0266	6.3777	6.6356	6.9656	6.7121	1.91482	0.00735181	up
SM(t18:0/16:1)	7.1786	7.3622	7.3709	7.219	6.8199	7.368	7.5412	7.4867	7.5425	7.3647	7.4406	7.492	1.69535	0.0299375	up
SM(d44:5)	7.9142	8.1506	7.8056	7.8939	7.5923	8.1055	8.42	8.5207	8.1059	8.2835	8.4679	8.4003	2.01598	0.0016167	up
SM(d44:6)	7.2945	7.5932	7.4768	7.5028	7.3126	7.7311	7.6675	7.7886	7.6312	7.5956	7.7293	7.7078	1.66437	0.0304577	up
SM(d36:5)	6.5937	6.6524	6.8216	6.5455	6.3343	6.8906	6.9337	7.0818	6.7433	6.8154	6.7494	6.8842	1.61063	0.0448155	up
SM(d38:0)	6.6935	6.7006	6.6852	6.6516	6.4003	6.9906	7.1542	7.578	6.9532	6.9157	7.428	7.0889	2.00306	0.00439178	up
TG(16:0/17:0/18:1)	8.1285	8.1001	8.577	8.3141	8.0972	8.217	7.9775	7.935	7.8889	8.0361	8.1641	8.1	1.27993	0.0341556	down
TG(19:1/16:0/18:1)	8.8097	8.7044	8.8051	8.8473	8.6765	8.9552	8.6595	8.5575	8.5969	8.7194	8.8093	8.6867	1.1616	0.0426599	down
TG(48:9)	6.7296	6.7219	7.0991	6.8484	6.9215	6.4089	6.5914	6.4898	6.3373	6.2691	6.38	6.2765	1.72428	0.0065969	down
Cer(d18:2/18:0)	7.0241	7.2415	7.2286	7.1911	7.2276	7.0711	7.0013	7.0283	7.0171	7.0535	6.8813	7.0689	1.81647	0.00869526	down
Cer(d44:1)	5.6618	5.4562	6.0233	6.2414	5.9991	5.7522	5.6438	5.4248	5.5919	5.4761	5.6314	5.445	1.51033	0.0394087	down
Cer(d46:0)	6.0758	5.9648	6.3933	6.5455	6.2978	6.128	6.0424	5.7735	5.9231	5.8978	5.9394	5.9963	1.68562	0.0163813	down
Cer(d48:0)	5.8644	5.6857	6.1683	6.3765	6.0351	5.9229	5.8153	5.6533	5.783	5.6881	5.7343	5.729	1.52537	0.0382173	down
Cer(d18:1/24:2)	6.7059	6.5776	6.6875	6.5084	6.848	6.6593	6.7355	6.7897	6.8251	6.9336	6.7715	6.7249	1.17353	0.046215	up
Cer(m44:0)	5.7344	5.6534	6.0037	6.2302	5.9644	5.802	5.715	5.6262	5.6024	5.6203	5.6822	5.651	1.56271	0.0334663	down
Cer(m46:0)	5.677	5.5796	6.0498	6.2065	5.9517	5.6423	5.6306	5.507	5.5547	5.5339	5.4908	5.5508	1.63139	0.0311365	down
Cer(t18:0/24:0)	5.9918	5.868	6.3061	6.1965	6.0753	5.9441	5.8015	5.9185	5.7504	5.7493	5.8706	5.8454	1.54853	0.0135599	down
Cer(t18:0/26:0)	6.0231	5.7071	6.2227	6.4737	6.161	5.9327	5.8018	5.645	5.868	5.7687	5.8584	5.7904	1.53501	0.0382252	down
Cer(t20:1/24:0)	6.2719	6.0097	6.5385	6.6109	6.469	6.2707	6.1758	6.1677	6.0949	6.0592	6.1565	6.0714	1.43693	0.0440404	down
Cer(t38:0)	5.9492	5.4387	5.5467	5.3029	5.7811	5.6225	5.7673	5.8702	5.7711	5.9695	5.8954	5.8615	1.40922	0.0471372	up
Cer(t44:0)	5.9627	5.6912	6.2417	6.2137	6.0719	5.9747	5.7851	5.5845	5.827	5.7766	5.7352	5.739	1.67714	0.0160669	down
Cer(t45:0)	5.7353	5.6969	6.0135	6.3474	5.9866	5.8276	5.6906	5.588	5.6075	5.5887	5.6396	5.629	1.65952	0.0240793	down
Cer(t46:0)	5.9557	5.7006	6.2667	6.5072	6.1023	5.91	5.8454	5.6864	5.7459	5.755	5.7937	5.8055	1.47041	0.0481713	down
Cer(t46:1)	5.9022	5.6201	6.1639	6.2962	6.0549	5.8298	5.7862	5.5368	5.7672	5.4109	5.7175	5.7653	1.48302	0.0273123	down
Cer(t46:1+O)	5.9861	5.7358	6.2474	6.3601	6.0553	5.9378	5.8439	5.6868	5.7993	5.7482	5.7068	5.8218	1.61173	0.0246863	down
CL(22:6/22:2/20:0/18:0)	6.7226	6.414	6.5239	6.358	6.4741	6.4086	6.8744	6.8543	6.6878	6.7438	6.7961	6.8408	2.01141	0.000901144	up
CL(76:11)	6.0442	5.791	5.281	4.7987	5.6411	6.2813	6.4189	6.2208	6.1685	6.5042	6.4637	6.1057	1.61733	0.0260137	up
CL(10:3/16:1/14:1/16:1)	6.4553	6.49	6.746	7.0352	6.6413	6.5209	6.3589	6.3722	6.3743	6.3153	6.3925	6.3353	1.65313	0.0221238	down
CL(87:1)	5.8649	5.1189	5.2717	5.518	5.7954	5.6589	5.9041	5.8739	5.7608	5.9021	5.9906	5.8591	1.47903	0.034665	up
DGDG(28:1e)	6.5816	6.6784	7.1425	7.379	7.0781	6.8906	6.5942	6.5389	6.4985	6.5246	6.4359	6.4691	1.77288	0.0139069	down
GM2(d34:5)	6.9388	6.908	7.3905	7.5198	7.2311	7.0968	6.8784	6.7709	6.8523	6.8405	6.8656	6.8263	1.70449	0.0185105	down
GM3(t43:6)	6.9636	7.0718	7.0043	7.3071	6.8116	6.9973	6.7741	6.83	6.736	6.8177	6.8606	6.8052	1.51799	0.0191872	down
LPE(18:0)	4.0897	4.9353	4.4893	5.3869	4.3187	4.6416	3.9604	3.967	4.0758	4.5625	4.2541	4.0007	1.43618	0.0463172	down
MGDG(43:12)	5.4268	5.5726	5.7341	6.0348	5.6867	5.5221	5.3087	5.3516	5.3798	5.354	5.4114	5.3806	1.72532	0.0181205	down
MGDG(38:1e)	6.2485	6.2448	6.1142	6.1407	6.2396	6.2419	6.3596	6.4097	6.3529	6.3851	6.3719	6.3325	1.99579	0.000554667	up
PC(10:0/11:3)	6.1589	6.2371	6.3026	6.4916	6.036	6.2764	6.1168	6.072	5.894	5.7601	5.7693	5.7974	1.64594	0.00296182	down
PC(11:0/12:4)	6.0334	5.8836	6.1283	6.4281	5.9818	5.9761	5.9944	5.7618	5.7019	5.6533	5.6959	5.7546	1.6286	0.0091904	down
PC(15:0/10:0)	6.3893	5.8606	6.3484	6.3111	6.1946	6.0696	6.1448	5.5509	5.7366	5.2874	5.6071	5.7395	1.666	0.005215	down
PC(15:0/18:2)	7.3645	7.264	7.3181	7.3306	7.2179	7.201	7.3365	7.3965	7.4878	7.3438	7.349	7.3581	1.46461	0.0227828	up
PC(10:0/11:4)	6.8674	6.9054	6.9921	7.2236	6.6528	6.8688	6.8984	6.8812	6.6636	6.4885	6.5563	6.6046	1.18009	0.0455191	down
PC(16:1/18:1)	9.4529	9.421	9.4322	9.531	9.3848	9.4132	9.3441	9.3437	9.4378	9.3287	9.3435	9.3718	1.56387	0.0150004	down
PC(16:2e/22:5)	7.0406	6.9777	6.9269	6.8918	7.1129	7.0135	7.0133	7.2067	7.1367	7.1905	7.1454	7.1535	1.60654	0.00666075	up
PC(18:0/18:0)	5.6188	5.822	6.1125	5.6143	5.7614	5.7036	6.5111	6.8	6.1732	5.9963	6.5639	5.9499	1.8451	0.00837184	up
PC(18:0/20:1)	6.005	5.908	6.0013	5.5355	6.0986	6.0588	6.2195	6.418	6.1319	6.3015	6.3205	6.3256	1.80678	0.00661976	up
PC(18:0e/16:0)	6.9134	7.0027	7.0259	7.0454	7.0071	6.9389	7.1593	7.0897	7.2576	7.1112	7.291	7.165	1.83181	0.000985695	up
PC(18:0e/18:1)	7.2454	7.1686	7.2182	7.3031	7.3355	7.2071	7.3978	7.1979	7.2774	7.393	7.4352	7.4044	1.15523	0.0479894	up
PC(18:0e/22:4)	6.7227	6.6634	6.6282	6.6342	6.8186	6.7132	6.7671	6.7108	6.7887	6.8434	6.8847	6.8813	1.3752	0.0170399	up
PC(18:2e/22:4)	6.7208	6.8428	6.7371	6.8452	6.7971	6.6302	6.8123	7.025	6.8829	6.7863	7.0205	6.9586	1.54604	0.0191511	up
PC(18:2e/22:5)	6.6342	6.7353	6.6751	6.6397	6.6472	6.4947	6.6614	6.9389	6.7371	6.7638	7.0921	6.856	1.63253	0.0231705	up
PC(19:3)	5.8776	5.798	5.9681	6.3067	5.5453	5.7661	5.7777	5.6072	5.5422	5.4079	5.4621	5.5284	1.399	0.0258032	down
PC(8:0/11:1)	6.6139	6.5349	6.7513	7.0623	6.4798	6.6637	6.6343	6.3166	6.2768	6.2607	6.2316	6.2431	1.61052	0.00786016	down
PC(8:0/11:2)	7.715	7.5423	7.7667	8.0024	7.4865	7.7228	7.6869	7.5008	7.4121	7.2426	7.2799	7.3292	1.43639	0.0144961	down
PE(16:1e/16:0)	6.4999	6.5205	6.4636	6.3103	6.464	6.4827	6.5511	6.6275	6.7051	6.4407	6.7931	6.5768	1.61864	0.0264018	up
PE(16:1e/20:3)	7.229	7.37	7.2466	7.3695	7.328	7.3367	7.1183	7.1666	7.2961	7.2209	7.2281	7.2864	1.54355	0.0314491	down
PE(16:1e/20:4)	7.163	7.2345	7.119	7.2237	7.2388	7.1175	7.2253	7.2536	7.2141	7.3335	7.2448	7.2606	1.15457	0.0327311	up
PE(16:1e/22:6)	7.484	7.5202	7.318	7.2793	7.3691	7.6084	7.5142	7.6883	7.6571	7.6168	7.5711	7.5235	1.59106	0.0249492	up
PE(18:0/18:1)	7.8528	7.8526	7.8527	7.743	7.8129	7.9673	7.8626	7.9994	7.9466	7.9025	8.0035	8.0279	1.69682	0.0200702	up
PE(18:0e/16:0)	6.4912	6.4342	6.5693	6.4315	6.4023	6.4367	6.5258	6.4748	6.6778	6.5156	6.6939	6.6167	1.5469	0.0232396	up
PE(18:1/22:0)	5.5821	4.946	5.2482	5.4442	5.4777	5.5891	5.8236	6.1435	5.6976	5.4684	5.9665	5.8995	1.78182	0.00850326	up
PE(18:1/22:1)	5.6137	5.2032	5.3649	5.1789	5.5744	5.6659	5.8953	6.0037	5.8207	5.7103	5.8723	5.9455	1.94227	0.00246173	up
PE(18:1/24:0)	5.3227	5.0298	4.8625	4.7961	4.985	5.3665	5.6077	5.9625	5.7003	5.2058	5.9394	5.6637	1.9934	0.00195569	up
PE(18:1e/16:0)	6.6547	6.4856	6.5013	6.4264	6.5913	6.6396	6.7607	6.9813	6.902	6.7536	7.119	6.7859	2.01265	0.00127826	up
PE(18:1e/18:1)	8.0138	7.8189	7.9017	7.8369	7.9749	8.01	8.1099	8.1454	8.0836	8.0725	8.1336	8.1443	1.99235	0.00203377	up
PE(18:1e/18:2)	8.9171	8.7587	8.7224	8.752	8.8767	8.8825	8.9278	8.9083	8.8733	8.9155	8.9272	8.9342	1.49875	0.0354169	up
PE(18:1e/20:1)	6.3749	6.2704	6.4284	6.4212	6.5817	6.5114	6.5252	6.8561	6.4708	6.5345	6.9226	6.6482	1.58775	0.032936	up
PE(18:1e/20:2)	7.0525	7.0301	6.9657	6.9405	7.1655	7.1078	7.1606	7.2729	7.0501	7.2115	7.3267	7.1827	1.63461	0.0133529	up
PE(18:1e/22:2)	6.2323	6.0685	5.9714	6.1236	6.2691	6.2294	6.235	6.3945	6.1758	6.2364	6.3645	6.4011	1.46016	0.0335287	up
PE(18:2e/20:4)	8.5324	8.577	8.5477	8.4637	8.5953	8.6038	8.5629	8.6812	8.6396	8.6279	8.6152	8.6226	1.50393	0.0229497	up
PE(18:2e/22:6)	7.1443	7.2019	7.0244	6.8942	7.1043	7.2911	7.209	7.5061	7.3365	7.4474	7.3053	7.2566	1.67716	0.0101376	up
PE(18:3e/20:4)	7.7544	7.8812	7.5607	7.6195	7.7252	7.6848	7.7598	7.9662	7.8931	8.0474	7.9301	7.8666	1.59999	0.00682013	up
PE(20:1/18:1)	6.3842	6.5092	6.5575	6.2507	6.5394	6.5817	6.7248	6.6773	6.5173	6.7066	6.7677	6.6982	1.71836	0.00875557	up
PE(37:2e)	5.9748	5.7572	5.8196	5.7099	5.99	5.6962	5.9425	6.0799	5.9351	5.8867	6.1036	6.0146	1.49984	0.0269078	up
PE(18:0/20:1)	5.9379	5.792	6.0595	5.6099	6.0186	6.0452	6.1078	6.433	6.0442	6.1345	6.2908	6.1719	1.75379	0.0120366	up
PE(8:0/11:2)	7.7036	7.5902	7.759	8.1101	7.5891	7.845	7.7691	7.3494	7.3614	7.4205	7.2705	7.3703	1.59951	0.00975989	down
PE(9:0/12:4)	7.6034	7.6536	7.7541	8.038	7.4813	7.765	7.7028	7.4994	7.4164	7.3656	7.2459	7.3477	1.45911	0.0178929	down
PE(9:0/14:4)	6.8177	6.8131	7.0083	7.3142	6.8056	6.9516	6.8858	6.5947	6.5984	6.5687	6.5272	6.5983	1.64175	0.00882947	down
PG(18:1/18:1)	7.077	7.27	6.852	6.9162	6.9511	7.1642	7.3041	7.5596	7.206	7.3255	7.265	7.2187	1.73492	0.00894	up
PIP2(37:2e)	7.1702	6.9748	7.5509	7.6042	7.4457	7.3444	6.8059	6.7752	6.9344	6.7378	6.968	6.9644	1.85455	0.00286898	down
PS(16:1e/20:3)	6.9313	6.8189	7.3143	6.9687	7.1807	7.1429	6.9076	6.823	6.8528	6.7609	6.8966	6.8451	1.41091	0.0361402	down
PS(16:1e/20:4)	7.2169	7.106	7.6607	7.4456	7.5884	7.5018	7.1787	7.0713	7.1722	7.1047	7.1055	7.1065	1.66899	0.0192163	down
PS(11:0/16:0)	6.4492	6.759	6.8759	7.0276	6.4121	6.8378	6.6919	6.1815	5.8966	6.0379	6.0176	6.0767	1.6484	0.00369062	down
PS(16:1e/22:5)	6.215	6.0845	5.9811	6.0812	5.9469	6.1292	6.2387	6.2512	6.1522	6.2353	6.2419	6.1736	1.79643	0.0141442	up
PS(18:1/18:2)	6.4518	6.313	6.6009	6.6394	6.3693	6.5333	6.2163	6.2602	6.291	6.1085	6.2685	6.3187	1.62677	0.00424751	down
PS(18:1e/20:4)	6.5928	6.527	6.8433	6.3446	6.7591	6.5993	6.34	6.2996	6.4497	6.5105	6.3466	6.3571	1.59084	0.0236345	down
PS(20:3/18:2)	6.9994	7.0977	7.2571	7.2091	7.2752	7.2477	7.0748	6.9973	6.8681	7.0315	7.0033	6.9772	1.70525	0.00661865	down
PS(38:2e)	5.9421	6.0275	6.1082	6.0662	6.132	6.0754	5.5395	5.7649	5.9522	5.62	5.8364	5.8364	1.8271	0.003285	down
PS(38:7e)	7.1757	7.2589	7.7172	7.623	7.5745	7.4833	7.1228	7.225	7.1603	7.1089	7.0608	7.054	1.76615	0.00867508	down
PS(40:4e)	5.8354	5.1963	5.6662	5.3794	5.9179	5.8636	5.9356	6.2721	5.8973	5.9812	6.3609	6.0531	1.70209	0.0138435	up
PS(40:5e)	6.3853	6.2271	6.3303	6.2305	6.5399	6.4764	6.5097	6.5062	6.3808	6.574	6.6226	6.5051	1.39402	0.0384656	up
PS(40:6)	7.172	7.4325	7.4468	7.4897	7.5594	7.5006	7.2491	7.3696	7.2713	7.3257	7.2888	7.2346	1.45896	0.0488589	down
PS(40:8e)	6.8509	7.0232	7.4994	7.3424	7.3258	7.2258	6.8734	7.0265	6.9455	6.8702	6.8093	6.8251	1.61424	0.0194729	down
PS(42:8e)	6.8942	6.9978	7.176	6.8119	7.1249	7.2361	6.777	6.8004	6.8496	6.7861	6.7772	6.8749	1.57759	0.0188288	down
PS(44:9)	6.9085	6.8043	7.1696	6.9865	7.008	6.9894	6.9044	6.8817	6.7779	6.753	6.7833	6.8039	1.43332	0.0215047	down
PS(18:1/20:3)	7.6853	7.8304	8.0132	7.7938	8.0027	7.968	7.6589	7.6823	7.5809	7.6222	7.5752	7.6135	1.85407	0.00381556	down
SM(d38:1)	7.3316	7.2545	7.3345	7.3119	7.3921	7.2662	7.4258	7.4573	7.3632	7.4799	7.4355	7.434	1.76978	0.00130209	up
SM(d40:1)	7.7147	7.546	7.5773	7.4741	7.6761	7.6558	7.8447	7.8599	7.7482	7.8574	7.8392	7.8435	1.99228	0.000869242	up
SM(d41:1)	7.2309	6.886	6.9994	6.9332	7.1362	7.0732	7.2839	7.2743	7.1556	7.2568	7.2684	7.2528	1.75284	0.00970835	up
SM(d41:2)	6.2769	6.1699	6.2366	6.1702	6.202	6.2793	6.5163	6.3867	6.2658	6.2565	6.3264	6.3607	1.69025	0.0196605	up
SM(d42:1)	6.0465	6.1821	5.7282	5.7708	6.0749	6.1354	5.887	6.7542	6.3174	6.1575	6.6054	6.2821	1.48253	0.0488093	up
SM(d42:2)	7.7628	7.7402	7.7275	7.6149	7.7584	7.785	7.9449	7.9235	7.8884	7.9141	7.9209	7.9242	2.1027	0.000363317	up
SM(d42:3)	7.1118	7.1937	7.1127	7.0419	7.2455	7.1141	7.2758	7.3123	7.278	7.2829	7.2357	7.2573	1.70421	0.00411808	up
SM(d43:1)	6.2297	5.8833	5.9579	5.7868	6.1806	5.9924	6.247	6.2336	6.2685	6.1369	6.3203	6.2891	1.64095	0.015517	up
SM(d43:2)	6.0362	5.8624	5.8415	5.7579	5.9761	5.915	6.1596	6.1382	6.0064	6.0815	6.1761	6.0284	1.84873	0.00302761	up
SM(d44:2)	5.787	5.529	5.51	5.33	5.6812	5.8691	5.9811	6.5083	6.1134	5.7173	6.4654	6.0646	1.89261	0.00648981	up
SM(d40:0)	6.2872	5.6934	6.043	5.6671	6.0777	6.1661	6.3306	6.7904	6.2737	6.0859	6.683	6.2834	1.72615	0.0199675	up

## Sheet: Table S7
Table S7. DEGs of LD muscle in CT vs SeD
Gene name	CT-1	CT-2	CT-3	SD-1	SD-2	SD-3	log2FoldChange	pval	padj	Regulation
THBS2	1.12362	1.71769	0.984065	16.2022	20.3977	14.5424	3.56986	4.17362e-31	6.6348e-27	up
PPARGC1A	3.81161	2.55901	3.18718	0.884735	0.776322	0.783728	-2.10004	2.1268e-16	1.69049e-12	down
RLBP1	7.63464	5.56106	6.42598	1.99024	1.58266	2.01584	-1.9469	8.42424e-15	4.464e-11	down
CHAC1	3.5223	2.59276	4.36962	0.207771	0.377196	1.14654	-2.71484	1.6822e-10	6.68546e-07	down
ARID5B	10.6874	6.14599	11.2339	1.4698	1.30657	2.84641	-2.43781	4.13668e-10	1.31522e-06	down
PLIN2	19.793	14.8992	14.233	9.20491	5.43136	4.71744	-1.48336	1.00351e-09	2.6588e-06	down
NR6A1	1.65206	1.31099	1.55103	0.514535	0.360185	0.611691	-1.73985	1.50712e-08	3.42267e-05	down
ASB5	212.253	185.063	165.689	72.2911	79.151	105.017	-1.27195	4.00779e-08	7.31818e-05	down
ABHD2	1.3063	0.884935	1.00153	0.389763	0.267081	0.357362	-1.78744	4.14315e-08	7.31818e-05	down
GPX1	29.3849	28.4012	28.531	5.80373	16.6564	15.2865	-1.32977	1.11923e-07	0.000177925	down
NT5C2	12.6841	7.27066	9.55127	4.42849	4.71239	4.67512	-1.21765	2.61019e-07	0.000348008	down
ETS2	47.6954	37.4472	42.1146	15.3308	20.9345	25.2418	-1.18049	2.62697e-07	0.000348008	down
ZBTB16	33.2056	23.4098	33.2925	12.091	13.2274	18.3071	-1.17225	2.93364e-07	0.000358739	down
ENAH	16.8345	24.5293	18.6742	3.21161	5.84494	5.05019	-2.25025	3.18216e-07	0.000361334	down
INKA2	2.12886	3.31023	3.98925	7.5458	9.61051	9.98953	1.36239	6.21631e-07	0.000658805	up
HSF2	19.0957	15.8279	19.5393	6.66043	9.41093	10.5117	-1.16989	8.66425e-07	0.000812512	down
TINAGL1	6.7072	5.28922	6.91956	3.65314	1.99374	3.41221	-1.20364	8.68887e-07	0.000812512	down
TRIM54	104.101	98.6184	99.2918	54.722	48.8248	53.0799	-1.09482	2.23805e-06	0.00197657	down
PISD	7.65516	6.70775	9.57102	4.58441	3.10652	4.19567	-1.15614	3.37993e-06	0.00282793	down
TRIM63	433.21	467.605	382.133	220.059	197.676	268.267	-1.05368	6.20411e-06	0.00493134	down
CDO1	1.31054	1.09138	0.969347	3.23154	2.90033	1.97097	1.11883	2.29128e-05	0.0167216	Up
ANKRD1	156.55	329.175	215.133	6.6855	35.1528	34.2585	-3.37005	2.31412e-05	0.0167216	down
-	1.81619	2.09665	1.74221	4.09468	4.6129	4.30797	1.04738	3.04099e-05	0.0208837	up
FRAS1	1.35476	1.2325	1.42242	3.57834	2.58315	2.77532	1.00678	3.15285e-05	0.0208837	up
SEMA6D	0.582972	0.34673	0.370228	1.15795	1.19084	1.00699	1.24278	4.60064e-05	0.0261201	up
HABP2	2.8288	2.35288	3.51521	0.669393	1.06334	1.90707	-1.38541	5.27397e-05	0.0289104	down
FLNC	629.171	922.5	812.286	173.949	256.497	413.51	-1.6412	6.05248e-05	0.0307395	down
C4orf46	4.79722	3.45924	3.48072	1.47463	2.52837	1.90944	-1.11866	6.18773e-05	0.0307395	down
GPA33	2.43309	1.37042	1.47784	0.359788	0.901254	0.879171	-1.41336	7.6156e-05	0.0366864	down
OSMR	2.66368	2.32396	2.5723	1.55316	1.14075	1.32418	-1.05797	7.91953e-05	0.0370285	down
NRAP	158.755	216.378	200.324	76.9009	111.213	90.953	-1.20467	8.46014e-05	0.038426	down
HBEGF	34.8785	53.0551	48.6381	8.4807	18.1571	21.6691	-1.65561	9.03318e-05	0.0396192	down
CPM	1.01989	0.453102	0.911049	0.282522	0.346434	0.1965	-1.65004	0.000101536	0.0424768	down
ANKRD2	27.4951	19.4169	11.4675	6.74813	4.10052	5.06211	-2.00997	0.000112676	0.0459112	down
-	3.16203	1.50326	1.9039	0.750414	0.875634	0.953522	-1.45913	0.000115522	0.0459112	down
TNFSF18	0.0739098	0.0517162	0.0866545	0.356409	0.521226	0.483067	2.54928	0.00014142	0.0545802	up
MAP3K8	0.209437	0.146547	0.293297	0.0681315	0.0594191	0.0937016	-1.68575	0.000144201	0.0545802	down
BICDL2	0.323535	0.495888	0.162567	0	0.0224791	0	-5.61484	0.000163554	0.0590915	down
NFIL3	8.42794	13.3583	13.7027	2.28814	2.55904	6.23881	-1.83391	0.000185695	0.0641738	down
PLPPR5	0.0943453	0.303182	0.139291	0.70289	0.601611	0.440451	1.49277	0.00021275	0.0719591	up
BAG3	292.667	343.674	230.678	57.2038	73.0995	178.668	-1.63066	0.000248757	0.0790899	down
KLHL34	15.9686	11.8421	8.34096	6.79309	5.77505	3.96641	-1.26843	0.000287734	0.089005	down
MYF6	306.694	373.629	229.435	120.155	117.735	140.835	-1.42143	0.00029114	0.089005	down
BACH1	5.46436	3.57078	5.62869	1.58127	2.9604	3.37985	-1.01048	0.00037834	0.108842	down
ST8SIA4	0.962604	0.416631	0.527452	1.2032	1.51552	1.65858	1.09441	0.000380151	0.108842	up
ARID5A	1.63427	1.75705	2.54261	1.01503	1.07493	0.973682	-1.10696	0.000383415	0.108842	down
ABCA1	0.240489	0.246804	0.293236	0.609665	0.575462	0.687106	1.11287	0.000437813	0.119999	up
STC2	2.30789	4.75676	4.0772	0.259572	0.973565	1.38528	-2.25097	0.000455874	0.12046	down
SOCS3	7.36575	4.08253	4.02388	1.05485	2.61938	2.62524	-1.4047	0.000471178	0.12046	down
SC5D	0.662516	0.2649	0.443861	0.977997	1.35793	1.10463	1.22053	0.000473377	0.12046	up
GCNT3	0.21985	0.090249	0.0412416	0.403871	0.419149	0.312016	1.59261	0.000482431	0.12046	up
ARC	0.440867	0.50623	0.225311	0.0155748	0.0659752	0.14249	-2.52125	0.000505423	0.121738	down
POMP	0.550636	0.256861	0.307422	0.97541	0.816171	1.15067	1.28966	0.00052187	0.123635	up
TMCC3	0.790174	0.698401	0.630621	0.420193	0.315536	0.279582	-1.21076	0.00053233	0.123635	down
TRAFD1	16.3165	24.8975	34.009	7.67666	8.87031	8.19289	-1.76903	0.000568879	0.127373	down
-	4.23169	4.50188	5.58999	0.995497	1.34298	3.59017	-1.40819	0.000587512	0.127941	down
LURAP1L	0.182875	0.134055	0.193989	0.635899	0.635304	0.439071	1.60228	0.000629341	0.13164	up
RUNX1	1.15288	1.44276	2.10623	0.391255	0.657543	0.76086	-1.52745	0.000662467	0.134882	down
-	1.31228	1.06498	1.51046	0.875118	0.58578	0.688169	-1.00035	0.000670295	0.134882	down
KERA	0.851909	0.171848	0.287945	1.12087	1.27659	1.33288	1.43506	0.000716647	0.140649	up
CD200	0.155266	0.144857	0.224049	0.691132	0.580884	0.412612	1.53039	0.000728853	0.1413	up
NXPH2	0.21338	0.116127	0.0972901	0.489983	0.74375	0.415069	1.83216	0.000803257	0.151816	up
LRRC17	0.185084	0.140867	0.224613	0.541324	0.611168	0.322887	1.2781	0.000836117	0.151816	up
SPRY4	0.716204	0.502675	0.662518	1.58124	2.10277	1.13498	1.22039	0.000836737	0.151816	up
-	0.206719	0.137757	0.100023	0.415915	0.497908	0.431981	1.47189	0.000925213	0.161628	up
-	4.35264	3.5194	3.40213	0.999494	1.48186	2.43844	-1.32371	0.00108484	0.183465	down
MPV17	11.3734	5.34166	4.18412	1.32543	0.950853	2.30351	-2.29079	0.00115063	0.190362	down
DNAJA4	12.8358	8.92563	7.49069	4.25345	4.14312	7.26022	-1.02496	0.00131013	0.208272	down
CDHR3	0.0434886	0.175817	0.0453223	0.50597	0.239712	0.365448	1.84751	0.00137795	0.214758	up
PDLIM3	176.59	250.199	166.235	91.1049	87.5815	98.3892	-1.2631	0.00147744	0.22422	down
RERG	1.47599	0.898072	1.60511	0.766279	0.665842	0.53927	-1.14758	0.00181964	0.260602	down
GPM6A	0.250793	0.440434	0.311336	0.853679	0.918403	0.854016	1.21417	0.00183954	0.2611	up
-	0.257783	0.424414	0.865219	0.0696406	0.0442499	0.0566334	-3.35125	0.00191844	0.26419	down
LONRF3	3.07951	5.3557	7.03654	1.5572	1.84739	1.90353	-1.71087	0.0020571	0.277133	down
WNT5A	0.285786	0.166642	0.178702	0.505311	0.674122	0.360232	1.16099	0.00223482	0.293611	up
KLHL40	52.6304	88.5843	62.0427	27.0451	30.9279	26.3841	-1.44224	0.00226538	0.294912	down
FKBP5	15.0243	4.44182	12.5139	1.75484	2.11856	4.55237	-2.01483	0.00228183	0.294912	down
SLC25A25	25.7295	21.2244	15.2751	46.9982	55.2013	90.5902	1.50127	0.00251473	0.314777	up
AP3M2	0.308429	0.119897	0.381703	0.849891	0.925042	0.491965	1.36122	0.00274818	0.336061	up
ARRDC1	4.248	3.82902	3.15544	1.14501	1.56702	3.18741	-1.05951	0.00289567	0.343775	down
TNMD	0.166435	0.0388194	0	0.573276	0.68805	0.271951	2.83545	0.00289777	0.343775	up
NOX5	0.317476	0.25388	0.289505	0.562385	0.727919	0.656375	1.04035	0.00305142	0.35668	up
ZKSCAN2	0.103667	0.0371991	0.012466	0.263687	0.302517	0.111686	2.04959	0.00331159	0.380636	up
PAPPA	0.293912	0.232022	0.265071	0.124598	0.12462	0.0844385	-1.38846	0.00334814	0.380636	down
SMCHD1	0.263014	0.105164	0.143905	0.307156	0.456854	0.340299	1.00487	0.0033693	0.380636	up
SDS	1.21945	1.21896	0.930455	0.720053	0.282423	0.460861	-1.36082	0.00359182	0.392598	down
-	0.875095	0.381	0.592796	0	0.0567479	0.217887	-2.83203	0.00372232	0.400029	down
MAST4	3.3954	5.4669	6.58974	1.54563	2.42618	2.85525	-1.33877	0.00376998	0.400029	down
ARG2	0.690896	0.580121	1.40405	2.09418	3.46103	4.80591	1.81944	0.00381214	0.400029	up
CCDC88A	0.163329	0.0582626	0.0938688	0.216205	0.322417	0.242206	1.20729	0.00388951	0.400029	up
EPHB2	0.353499	0.494701	0.396034	1.12561	0.916943	0.759142	1.00064	0.00389088	0.400029	up
RWDD2A	0.289099	0.244031	0.161405	0.720757	0.575813	0.527009	1.24825	0.00390648	0.400029	up
MED12L	0.649002	0.2685	0.307579	0.151053	0.168536	0.128872	-1.55678	0.00397588	0.400029	down
RERGL	0.123594	0.0849638	0.157617	0.394342	0.385974	0.194357	1.26922	0.00409018	0.400744	up
LXN	2.18602	1.16541	1.46455	6.35151	3.51503	3.24908	1.31529	0.0040915	0.400744	up
CDKL1	0.181634	0.105911	0.207039	0.43794	0.353357	0.452245	1.20152	0.00416058	0.400744	up
THOC6	2.90778	2.43187	1.89941	0.667712	0.94955	2.01685	-1.11965	0.00422886	0.400744	down
NEMP1	0.246497	0.061326	0.154135	0.347165	0.495529	0.345232	1.27046	0.00423836	0.400744	up
RHNO1	0.414195	0.328463	0.161872	1.16036	1.18854	0.502753	1.51253	0.00431651	0.400744	up
PRKAG2	2.13331	2.35085	1.38148	1.22112	0.681676	1.06329	-1.14096	0.00434265	0.400744	down
-	0.659887	0.347002	0.740852	0.429792	0.128376	0.0896198	-1.58004	0.00444214	0.401602	down
CTH	0.652443	0.779141	0.407972	1.96564	2.48779	1.07217	1.42302	0.0044715	0.401602	up
CD163	1.82842	0.752038	2.04894	0.523694	0.841456	0.348781	-1.55369	0.00471091	0.407007	down
-	0.161469	0.10043	0.0841387	1.08762	0.418836	0.603054	2.47275	0.00494434	0.420321	up
-	0.0354221	0.00367194	0	0.0542264	0.0803966	0.047773	2.19124	0.00505957	0.423327	up
NDEL1	9.49996	3.08147	9.17445	1.76338	1.64253	3.61974	-1.72948	0.00516003	0.427466	down
-	0.0267033	0.0622829	0.135668	0.355648	0.168836	0.361527	1.80573	0.00540907	0.443237	up
HHATL	2.57377	2.65716	1.08469	0.444649	0.596457	1.00193	-1.76779	0.005498	0.44575	down
LRRN1	0.638941	0.638185	0.634547	2.7894	1.11871	1.83887	1.43036	0.0055519	0.44575	up
KRT80	2.61338	2.70122	1.72907	0.786863	1.87755	0.455622	-1.32705	0.005896	0.463981	down
GADD45A	7.01772	8.10324	14.0855	1.90989	1.81191	6.28954	-1.68375	0.0059249	0.463981	down
YOD1	0.719144	0.475244	0.28105	0.178898	0.145734	0.265788	-1.44173	0.00619522	0.478609	down
ABRA	241.788	173.831	133.903	95.1908	56.5283	141.446	-1.03313	0.00620992	0.478609	down
MAP3K14	5.62611	11.0386	10.6555	3.76928	3.45797	4.73356	-1.36569	0.00657797	0.496719	down
IDNK	0.709548	0.36108	0.504182	0.0888725	0.0627444	0.301139	-1.89963	0.00665542	0.496719	down
SERPINE1	48.5502	46.8714	21.5165	8.18764	14.7061	21.6429	-1.52694	0.00670317	0.497945	down
RCAN1	134.019	119.818	41.8356	24.2655	18.9349	38.9473	-1.98309	0.006824	0.504563	down
NR5A2	0	0.00838265	0.0210687	0.11554	0.0873985	0.0671143	2.99893	0.00714209	0.523215	up
CHGB	0.156098	0.210359	0.0677833	0.446067	0.421775	0.469634	1.45789	0.00733432	0.532391	up
TMC7	2.10046	0.763799	0.820884	0.372189	0.321756	0.332014	-1.9443	0.00781022	0.559024	down
PHIP	0.239648	0.201945	0.181272	0.355033	0.63165	0.411427	1.02855	0.00808418	0.566516	up
NRIP2	0.547164	0.756271	0.316798	1.86141	1.2616	0.927166	1.14566	0.00820033	0.566516	up
CASP8AP2	0.0461387	0.0143485	0.0320561	0.0753408	0.16456	0.0909461	1.74033	0.00820753	0.566516	up
HBB	0.0523045	0.0487981	0.0817649	0.240213	0.610529	0.683714	2.93389	0.00834903	0.570086	up
-	2.04283	2.18782	2.84387	1.45447	0.164611	1.7381	-1.22747	0.00835567	0.570086	down
ZFAND2A	29.5184	37.529	15.6178	3.95008	6.37434	15.324	-1.8331	0.00877277	0.593202	down
DCLRE1B	0.404543	0.369035	0.428627	0.148632	0.183636	0.293783	-1.07772	0.00883362	0.593202	down
USP43	0.411039	0.223699	0.303429	0.125849	0.133275	0.13859	-1.35829	0.00884821	0.593202	down
SRRM3	0.302967	0.344103	0.463317	0.290379	0.0896915	0.110692	-1.34967	0.00897559	0.597008	down
ZDHHC22	0.0485347	0.0603746	0.0126453	0.297199	0.173105	0.151056	2.18204	0.00904279	0.598517	up
-	0.121258	0.158381	0.13269	0.568026	0.318465	0.260403	1.30246	0.00911981	0.598517	up
ATF3	187.39	159.394	208.736	17.7831	39.1906	172.793	-1.39054	0.009167	0.598517	down
ACKR1	8.56096	13.1216	12.5977	9.02684	5.31083	3.18103	-1.15048	0.00919033	0.598517	down
CNKSR2	4.5468	2.55733	2.1425	2.02465	1.35293	1.49612	-1.04772	0.00931466	0.600589	down
ZNF518A	0.109232	0.0407635	0.0512269	0.150497	0.212503	0.173382	1.31572	0.00951141	0.602698	up
CSF3R	0.353862	0.270114	0.377164	0.22161	0.0625831	0.0901093	-1.57366	0.00961175	0.604126	down
CD300C	0.475121	0.599717	0.611662	0.282381	0.244672	0.104381	-1.58819	0.00967378	0.605449	down
PGGHG	0.266775	0.327488	0.42801	0.915666	0.846777	0.589944	1.0388	0.0100552	0.614796	up
SLC38A11	0	0.0367329	0	0.156711	0.114894	0.0612699	2.88844	0.0107323	0.638818	up
CEP162	0.084042	0.0548855	0.0459825	0.108072	0.253422	0.219716	1.53417	0.0108097	0.638818	up
CHRNA9	1.55355	1.56535	2.98716	0.0856177	1.02759	1.16044	-1.55536	0.0110022	0.641733	down
FOSL1	0.669735	1.22251	2.13944	0.0802386	0.481515	0.48939	-2.09166	0.0115956	0.666241	down
SLC25A45	1.19085	2.16648	2.09429	0.820362	0.830157	1.13043	-1.14115	0.011609	0.666241	down
MRC1	1.16861	0.629	0.960254	0.330273	0.83797	0.321743	-1.00838	0.0121305	0.680089	down
GNAT1	0.305115	0.115403	0.264268	0.151488	0.0481282	0.100095	-1.31184	0.0123203	0.680089	down
CCDC170	0.0408699	0.0857925	0.0958347	0.234623	0.258406	0.219421	1.50079	0.0123928	0.680089	up
KIRREL2	0.0167353	0.0624537	0.0392422	0.122974	0.179066	0.343767	2.25864	0.0126126	0.684307	up
-	3.63181	12.2861	9.59288	0.172545	0.215524	4.80769	-2.45823	0.0130357	0.692977	down
CCL21	6.45282	6.79425	5.18778	29.4657	16.8576	10.7589	1.46499	0.0132955	0.692977	up
RASSF10	0.292256	0.347026	0.664535	0.0976151	0.20675	0.17365	-1.59634	0.0134429	0.69822	down
MADD	0.0611476	0.0494419	0.0573533	0.157262	0.126889	0.140831	1.19767	0.0135432	0.69822	up
ZNF346	0.420076	0.453796	0.432029	1.2997	1.11831	0.598659	1.04572	0.0136569	0.69822	up
ABHD3	2.58326	1.18758	1.43388	0.790924	0.746551	1.22347	-1.02041	0.014184	0.707742	down
-	56.0698	35.4773	101.602	259.287	123.045	368.822	1.8279	0.0142058	0.707742	up
-	0.334108	0.453396	0.759699	0.306884	0.206813	0.0567193	-1.61838	0.0142222	0.707742	down
-	0.262463	0.66464	0.644748	0.241076	0.0364717	0.227557	-1.82639	0.0142466	0.707742	down
IYD	0.0322522	0.33099	0.252091	0.0296242	0.0156861	0	-4.00591	0.0143343	0.708414	down
GPR85	0.0284244	0.0662972	0.0444344	0.221921	0.179718	0.199049	1.92149	0.0143818	0.708414	up
ETV1	0.204625	0.0526639	0.110303	0.220356	0.370629	0.270116	1.14051	0.0144829	0.708414	up
HOXC5	1.14113	0.690569	1.06068	3.34273	1.31999	2.85085	1.24501	0.0146383	0.709429	up
SRARP	0.547652	0.306563	1.02734	0.100606	0.213084	0.153403	-2.13713	0.0147627	0.709429	down
SCLT1	0.126537	0.0533146	0.14038	0.198709	0.273961	0.228672	1.01524	0.0148607	0.709429	up
DYNC1I1	1.24941	1.49026	0.877675	0.842544	0.753806	0.398702	-1.02531	0.016613	0.770817	down
-	0.869841	0.147551	0.618081	2.39689	1.69222	0.959838	1.52723	0.0167483	0.770817	up
COL11A2	0.0220735	0.0549166	0.0287553	0.114891	0.164613	0.0961802	1.63654	0.0170146	0.770817	up
SLC12A5	0	0.0126712	0	0.155938	0.0858725	0.0126812	4.02502	0.0171648	0.770817	up
TUFT1	0.0143962	0.0335776	0.11815	0.257851	0.252061	0.107533	1.7173	0.0174435	0.776747	up
SLC25A16	0.104017	0.150957	0.0993696	0.307856	0.415959	0.226615	1.25364	0.0176494	0.77937	up
FAM13A	2.96167	0.92492	2.69992	1.01369	0.891553	1.05373	-1.26069	0.0178367	0.780872	down
MID1	0.548393	0.511629	0.437757	0.300081	0.226992	0.294147	-1.01366	0.0181599	0.784477	down
TNFRSF17	0.850319	0.528876	0.841864	0.41655	0.165424	0.105859	-1.84031	0.0182193	0.78491	down
STX3	0.156932	0.202724	0.155687	0.0997927	0.0469694	0.101442	-1.21669	0.018407	0.788483	down
-	0.44199	0.154635	0.518205	0.0507469	0	0.103172	-2.96015	0.0185972	0.790479	down
SCD	5.9382	18.6559	2.40766	31.9086	20.2083	54.3584	1.77481	0.0186774	0.791774	up
VAV2	4.21359	2.33972	1.8729	1.60406	1.10613	1.77277	-1.02747	0.0187628	0.792232	down
TIPARP	9.81848	11.9923	12.0352	2.28826	5.48803	10.4381	-1.03438	0.0188377	0.792232	down
-	0.102783	0.159821	0.241013	0.0314694	0	0	-4.21134	0.0192248	0.803307	down
CCR1	0.198698	0.401652	0.556518	0.197717	0.144958	0.108223	-1.54199	0.0192527	0.803307	down
FPGS	1.22214	1.23794	0.723264	3.41578	2.70027	1.38564	1.07627	0.0194208	0.805091	up
FOS	20.6841	28.6279	11.7095	30.8881	221.912	158.41	2.60074	0.0198639	0.815326	up
GDNF	9.49398	23.586	16.7768	0.301569	5.94815	9.93746	-1.78635	0.0203691	0.823939	down
FNDC1	1.83091	2.19833	1.44975	5.43268	5.50547	2.28183	1.10348	0.0209487	0.837233	up
ARNTL2	0.0163065	0.0101422	0.00849702	0.0748888	0.0475847	0.0507511	2.17881	0.0210138	0.837233	up
-	0.393422	0.423516	0.21289	0.138986	0.0883126	0.0565136	-2.02435	0.02118	0.841745	down
LMOD2	456.119	174.229	259.208	190.418	162.528	77.858	-1.16108	0.0216036	0.853606	down
TET2	1.81998	1.31564	2.765	0.658708	1.21343	1.34482	-1.00435	0.0220812	0.858105	down
SMC2	0.0998114	0.0322339	0.0720138	0.137518	0.182974	0.139791	1.07136	0.0222394	0.858105	up
TNIP3	0.0305154	0.0284697	0.0397526	0.177516	0.168203	0.0569844	1.86958	0.0234788	0.878989	up
KLF5	5.05673	15.0649	9.67504	2.83526	2.59517	3.89593	-1.86675	0.02361	0.878989	down
MMRN1	0.111142	0.103691	0.103159	0.389201	0.135137	0.311319	1.24219	0.023764	0.882656	up
-	0.121074	0.145231	0.157724	0.100617	0.0560812	0.0484486	-1.21612	0.0246275	0.888996	down
NTSR2	1.40495	1.0669	0.178767	0.180066	0.0953453	0.213549	-2.56727	0.0257002	0.912058	down
ZNF658	0.119038	0.0777403	0.102347	0.240544	0.289475	0.288978	1.32547	0.0257605	0.912058	up
ELOVL4	0.18208	0.0463291	0.038814	0.319283	0.354224	0.154553	1.54816	0.0258401	0.912845	up
GPAT3	3.16124	3.36864	8.04506	1.61008	1.95283	1.69265	-1.62321	0.0260707	0.912878	down
FLT4	0.114968	0.140264	0.158987	0.617355	0.473133	0.181662	1.44691	0.0263505	0.916217	up
TECRL	2.41231	0.989843	1.23082	1.09761	0.619213	0.604804	-1.11218	0.0268914	0.925307	down
TOPAZ1	0.0102636	0	0.00802225	0.0282818	0.109819	0.0574985	3.35721	0.0269905	0.925391	up
TRPM3	0	0.00367396	0.00615601	0.0397879	0.0229831	0.0220612	2.89826	0.0270684	0.925391	up
MMP25	1.39362	0.415526	0.145987	0.0791792	0.0139752	0.040244	-3.96483	0.0285401	0.957176	down
TLR3	0.0764789	0.0927573	0.0478222	0.196692	0.18598	0.17138	1.19097	0.0288549	0.96367	up
-	0.823422	0.889519	0.880725	2.9457	1.47545	1.45673	1.01602	0.029107	0.963986	up
TMPO	1.32512	0.229752	0.444545	1.30331	2.07032	1.36318	1.17495	0.0297018	0.971543	up
PRRT1	0.481302	0.267511	0.176092	0.799513	0.896496	0.392022	1.05143	0.0298046	0.972903	up
-	0.0585443	0.207554	0.219646	0.0430192	0.056947	0.0546628	-1.83985	0.0302159	0.976306	down
HSPB8	610.923	1032.21	761.006	266.324	338.135	650.437	-1.09944	0.0303776	0.977709	down
-	0.115468	0.0718181	0.0902526	0.424237	0.187196	0.2875	1.5605	0.0306278	0.980553	up
SAMD13	0.190084	0.118227	0.0495247	0.494686	0.338979	0.414123	1.67847	0.0312184	0.993307	up
TVP23A	0.0441017	0.0411451	0.0517064	0.202541	0.0857968	0.11667	1.40758	0.0314878	0.997931	up
IL1RAP	1.04718	0.332898	0.654804	0.427492	0.27163	0.296948	-1.13665	0.0321946	1	down
RNF122	2.88089	1.92668	2.59643	4.5565	4.17483	8.28237	1.07679	0.0327451	1	up
-	0.0187544	0.0174971	0	0.206714	0.0182427	0.140088	3.17885	0.0328209	1	up
-	0.010342	0.00643247	0.00269453	0.0253315	0.0435927	0.0257503	2.16301	0.0334669	1	up
LYVE1	0.402989	0.118728	0.530502	0.974083	1.50608	0.594111	1.4307	0.0335117	1	up
DAPK3	3.03346	6.81051	8.74986	2.6245	2.38594	3.52672	-1.29724	0.0345702	1	down
SERPINB7	0.0254605	0.0237537	0	0.163701	0.0990635	0.19018	3.06073	0.0346288	1	up
PDK4	458.339	63.4557	156.507	77.9542	2.87507	3.80256	-3.10823	0.034923	1	down
LONRF2	0.277219	0.387952	0.433363	0.254631	0.151681	0.12942	-1.20981	0.0349435	1	down
RINL	0.391303	0.248248	0.171277	0.100637	0.137025	0.1023	-1.37723	0.0357544	1	down
NOG	0.451968	0.105417	0.176634	0.882172	0.6045	0.896754	1.61651	0.0358396	1	up
PON3	0.246926	0.131641	0.220575	6.28575	2.23032	0.526982	3.76574	0.036357	1	up
CTTNBP2	0.0838705	0.064021	0.125151	0.196093	0.296662	0.163739	1.12475	0.0382824	1	up
CD2AP	0.297252	0.0882396	0.158413	0.322673	0.315427	0.525651	1.00882	0.0382996	1	up
-	0.14416	0.194271	0.162758	0.456089	0.467421	0.299115	1.11862	0.0383252	1	up
LHFPL3	0.30245	0.156763	0.144468	0.0926017	0.0326886	0.0784436	-1.68684	0.0386931	1	down
SPRED3	0.355985	0.16606	0.185497	0.127158	0.057712	0.0553971	-1.68288	0.0390232	1	down
PROM1	0.614752	0.456888	0.643388	2.00981	1.21623	0.768568	1.0698	0.0398311	1	up
FSTL4	0.0343646	0.0577094	0.0805805	0.145196	0.106966	0.263107	1.41677	0.0399498	1	up
GNA15	0.1354	0.152918	0.133683	0.0523653	0.0901147	0.0598847	-1.2127	0.0400724	1	down
RPL26	0.133481	0.207554	0.173887	0.245209	0.692476	0.830875	1.62506	0.0405858	1	up
SPIN3	0.166492	0.0091371	0	0.170917	0.266741	0.137165	1.69168	0.0408431	1	up
-	0.318824	0.297451	0.0415335	0.878536	0.465188	0.744215	1.5192	0.0409435	1	up
TMPRSS15	0.0142183	0.0132651	0.0111133	0.0783583	0.082982	0.0265512	2.12733	0.0410676	1	up
-	0.0964459	0.0337426	0.146057	0.0498303	0.0175902	0.0225129	-1.75184	0.0413872	1	down
RHOH	0.120638	0.164497	0.13056	0.102284	0.0361066	0.0346583	-1.44562	0.0422566	1	down
-	0.0748585	0.02328	0.0585112	0.252116	0.218448	0.232985	2.06233	0.0425889	1	up
GRIN3A	0.0617206	0.0633412	0.0820119	0.232435	0.144088	0.115257	1.08675	0.0426263	1	up
SRSF12	0.224968	0	0.0439601	0.413274	0.820613	0.210053	2.3935	0.0427202	1	up
-	0.143471	0.0297451	0.0373801	0.0146423	0	0	-3.96328	0.043099	1	down
-	0.0431141	0.764251	1.24686	2.17805	1.17426	2.69712	1.36161	0.0435922	1	up
DOCK3	0.00462705	0.00431686	0.0144664	0.0807504	0.0315056	0.0216014	2.34694	0.0439895	1	up
PDE4D	14.4451	4.1039	9.6802	3.55031	4.27325	5.98319	-1.12277	0.0441456	1	down
C5AR2	0	0.0134041	0	0.0791792	0.0559009	0.0670734	3.63197	0.0442696	1	up
KCNJ16	0.0120412	0	0	0.0442403	0.0409944	0.0168643	3.07158	0.0443343	1	up
IL1R2	0.185489	0.12361	0.144982	0.0243392	0.0257754	0.0247415	-2.73082	0.044629	1	down
C1QTNF6	0.971695	1.05356	1.20425	3.56203	2.529	1.27508	1.02371	0.044722	1	up
-	0.211056	0.155885	0.206208	0.694659	0.410595	0.254539	1.0965	0.0453094	1	up
RAB19	0.10858	0.162082	0.0169738	0.279251	0.316853	0.283867	1.44034	0.0453767	1	up
BCAS1	0.111892	0.036844	0.133759	0.253915	0.179265	0.196657	1.03944	0.0455973	1	up
PCDHB7	0.0279483	0.078224	0.0436901	0.359394	0.0543715	0.417525	2.27701	0.0458141	1	up
-	34.3698	13.8158	37.6059	7.01173	7.03362	24.9063	-1.23848	0.0460104	1	down
S100A8	0.496582	0.0926582	0.621024	0	0	0.0927316	-3.77252	0.0463683	1	down
-	0.480148	0	0.0938238	0.55128	1.16762	1.12078	2.28787	0.0468826	1	up
ADAMTS4	1.0473	0.526124	0.367317	0.0863297	0.509361	0.18805	-1.4106	0.0478692	1	down
-	0.240583	0.118829	0.176984	0.480955	0.371677	0.343555	1.03442	0.048231	1	up
GPX2	0.89217	4.33703	4.29415	1.72521	0.319726	0.833018	-1.94076	0.0488329	1	down
PHLDB2	4.10915	0.759118	1.89093	0.72237	0.566467	0.752097	-1.8065	0.0496543	1	down
CHGA	0.117066	0.218436	0.0686261	0.0448029	0.00948932	0.0546522	-2.07279	0.0499303	1	down
-	0.758415	1.88686	1.97599	5.34073	3.44271	4.24879	1.30823	0.0499668	1	up

## Sheet: Table S8
Table S8. DEGs of LD muscle in CT vs SY3
Gene name	CT-1	CT-2	CT-3	SY3-1	SY3-2	SY3-3	log2FoldChange	pvalue	padj	Regulation
THBS2	16.2022	20.3977	14.5424	1.50384	1.15327	1.28132	-3.43525	5.36842e-30	8.5213e-26	down
ENAH	3.21161	5.84494	5.05019	29.4	33.7961	42.5692	3.15461	2.41744e-27	1.9186e-23	up
RLBP1	1.99024	1.58266	2.01584	4.71934	6.93574	5.99354	1.9112	4.09487e-15	2.16659e-11	up
MAST4	1.54563	2.42618	2.85525	4.65444	6.58534	5.23585	1.51525	7.21323e-11	2.86239e-07	up
RCAN1	24.2655	18.9349	38.9473	78.1735	133.589	113.82	2.22954	1.65442e-10	5.25212e-07	up
ZDHHC14	3.282	3.58237	2.70704	6.60344	8.47537	8.27198	1.54269	5.19886e-10	1.37536e-06	up
NT5C2	4.42849	4.71239	4.67512	11.4501	9.1643	10.7895	1.44541	7.11561e-10	1.61352e-06	up
ANKRD1	6.6855	35.1528	34.2585	117.479	226.474	236.246	3.16095	2.21478e-09	4.3944e-06	up
-	8.04554	11.7795	7.28921	20.1806	16.3059	18.2275	1.27479	5.54196e-08	9.77418e-05	up
ABHD2	0.389763	0.267081	0.357362	0.780856	1.1073	0.933349	1.73084	1.17944e-07	0.000187212	up
MAP3K8	0.0681315	0.0594191	0.0937016	0.254884	0.244106	0.32339	2.14741	1.90972e-07	0.000266838	up
MYBPH	56.3018	58.9155	116.062	161.709	165.457	212.064	1.46753	2.0173e-07	0.000266838	up
RNF115	3.76899	3.90038	4.09336	9.08781	7.93084	12.3829	1.57881	2.99653e-07	0.000365877	up
HBEGF	8.4807	18.1571	21.6691	41.2516	31.6739	39.298	1.46594	4.49389e-07	0.00050951	up
NRAP	76.9009	111.213	90.953	181.87	171.749	138.731	1.07662	9.20019e-07	0.000973564	up
TMC7	0.372189	0.321756	0.332014	1.31459	0.911267	0.869666	1.86098	1.16513e-06	0.00115588	up
BICDL2	0	0.0224791	0	0.420482	0.293837	0.277752	5.72247	1.83858e-06	0.0017167	up
FLNC	173.949	256.497	413.51	541.783	566.513	499.549	1.17593	2.38385e-06	0.00210216	up
ST8SIA2	12.7439	9.62976	14.3164	4.75771	2.51906	4.56512	-1.36611	3.08672e-06	0.00257871	down
SLC7A5	3.09942	3.39254	3.88542	7.76509	6.33969	5.50461	1.1779	4.2054e-06	0.00333761	up
ADORA1	13.0912	12.3253	34.8168	43.7747	48.7937	60.974	1.59103	5.34931e-06	0.00404331	up
NMRK2	13.2518	8.28582	18.1817	20.7492	24.4591	27.2216	1.11749	6.51777e-06	0.00470257	up
MAP3K14	3.76928	3.45797	4.73356	6.56451	6.47226	7.47717	1.03308	1.13014e-05	0.00779943	up
NFIL3	2.28814	2.55904	6.23881	12.6638	23.7411	12.9416	2.38855	1.32579e-05	0.00876846	up
DAPK3	2.6245	2.38594	3.52672	6.31595	6.17123	9.93797	1.64548	1.54222e-05	0.00979187	up
ENHO	52.2385	43.6027	32.6983	94.126	65.3074	94.3757	1.25115	1.72043e-05	0.0104295	up
ABCA1	0.609665	0.575462	0.687106	0.31321	0.175314	0.120434	-1.34948	2.45509e-05	0.0139177	down
GPX1	5.80373	16.6564	15.2865	20.8071	33.9878	32.5366	1.44806	2.79853e-05	0.0153176	up
GPAT3	1.61008	1.95283	1.69265	3.87382	2.95905	2.83608	1.14226	3.12753e-05	0.0165477	up
TIAM2	1.06166	1.69056	2.32384	2.5854	3.90473	3.16877	1.169	4.04458e-05	0.0194544	up
CDO1	3.23154	2.90033	1.97097	1.0276	1.23763	0.889747	-1.09818	4.36792e-05	0.0203918	down
PKIB	1.37058	2.00125	1.89987	0.714478	0.383288	0.498171	-1.45973	0.000105668	0.0453314	down
CDC25B	3.36039	2.67156	3.09294	1.14442	1.14628	1.5224	-1.00032	0.000137004	0.0567584	down
ARID5B	1.4698	1.30657	2.84641	2.84668	4.13855	4.39281	1.25885	0.000139455	0.0567584	up
NANOS1	1.2368	1.19589	1.9132	2.3547	4.91295	4.57364	1.68634	0.000161763	0.0614532	up
NOCT	1.9461	2.26131	3.15974	3.15621	5.02625	4.93679	1.0759	0.000165665	0.0614532	up
-	1.10787	0.537738	0.703866	0.0481275	0	0.100671	-3.7055	0.000183106	0.0645875	down
GEM	1.14862	1.52613	0.913544	0.310474	0.476025	0.492876	-1.23527	0.0001903	0.065666	down
STC2	0.259572	0.973565	1.38528	4.62323	4.51149	2.00489	2.33208	0.00020118	0.0674833	up
MED12L	0.151053	0.168536	0.128872	0.534329	0.567559	0.264715	1.86936	0.00020407	0.0674833	up
HOXD1	1.24398	1.26397	1.99934	4.20636	4.91785	2.4563	1.61254	0.000221558	0.0717713	up
ABAT	0.326172	0.532521	0.448993	0.162948	0.0752527	0.140785	-1.52279	0.000250423	0.0762267	down
SEMA6D	1.15795	1.19084	1.00699	0.390793	0.549755	0.357632	-1.11496	0.000324928	0.0920285	down
ASB5	72.2911	79.151	105.017	130.729	216.661	136.596	1.16154	0.000405149	0.108999	up
KLF2	20.2963	27.1399	18.1903	11.5297	7.35583	8.23098	-1.00803	0.000443949	0.116002	down
CASP10	0.893068	1.0148	1.31205	2.12727	1.48592	2.46655	1.17346	0.000445796	0.116002	up
TRAFD1	7.67666	8.87031	8.19289	11.337	23.2205	17.1593	1.30951	0.000491878	0.122664	up
MMP25	0.0791792	0.0139752	0.040244	0.247655	0.243571	0.187068	2.6212	0.000829202	0.190753	up
FAM167B	4.05058	2.72974	2.99457	6.03301	5.43725	5.73617	1.08107	0.000907311	0.205739	up
LRP2	0.169277	0.163259	0.14442	0.0819401	0.0418442	0.0197768	-1.45375	0.00118298	0.247071	down
PDE4D	3.55031	4.27325	5.98319	9.55003	6.1824	8.56698	1.07287	0.00120142	0.247665	up
CHAC1	0.207771	0.377196	1.14654	5.8178	2.57484	2.58924	2.91779	0.00153748	0.297615	up
PLPPR5	0.70289	0.601611	0.440451	0.130504	0.266576	0.178488	-1.34667	0.00189401	0.334039	down
HTATIP2	3.60468	2.16078	4.90874	5.85714	4.90832	7.17897	1.00494	0.00205144	0.340165	up
ALCAM	0.639479	0.518985	0.607523	0.311549	0.226132	0.162921	-1.0661	0.00207875	0.340165	down
BICD1	0.100449	0.111441	0.111834	0.024935	0.0264856	0.00521579	-2.25443	0.00210343	0.340692	down
MANEA	0.413722	0.657201	0.404984	0.151769	0.190903	0.167086	-1.28005	0.00218268	0.346456	down
AKIP1	2.42706	1.93983	1.58272	3.72403	3.33862	3.49541	1.09388	0.00239574	0.359848	up
HSPB8	266.324	338.135	650.437	565.017	923.696	765.53	1.08274	0.00252814	0.371566	up
PPP1R14C	24.5767	24.7392	21.8414	29.0145	45.1558	59.9013	1.16526	0.00266488	0.374333	up
MMRN1	0.389201	0.135137	0.311319	0.0598688	0.0235526	0.0904446	-1.9945	0.00288394	0.391255	down
RASSF10	0.0976151	0.20675	0.17365	0.941398	0.630595	0.345936	2.26607	0.00292231	0.3931	up
ETNPPL	3.67643	0	2.04242	0	0.0197257	0.0233074	-6.80731	0.0031632	0.411554	down
PAPLN	2.86347	1.29766	1.84875	0.295853	0.827293	0.639951	-1.51799	0.00357069	0.440469	down
TMCC3	0.420193	0.315536	0.279582	0.477916	0.712102	0.533165	1.02149	0.00362599	0.440469	up
DUSP16	2.00927	3.37167	5.6844	7.21643	5.81504	5.80764	1.01613	0.00371844	0.440469	up
IDNK	0.0888725	0.0627444	0.301139	0.586833	0.574117	0.419938	2.04589	0.00381609	0.443563	up
ADAM32	0.058223	0	0	0.121406	0.125374	0.296276	3.52252	0.00405381	0.459615	up
SLC39A10	0.6879	0.860944	0.902695	1.81256	1.00419	1.58204	1.10621	0.00411684	0.463451	up
TNFSF18	0.356409	0.521226	0.483067	0.0353894	0.172289	0.111039	-1.86206	0.00450016	0.499518	down
SRPK2	0.553797	0.62313	0.873748	0.805933	1.9751	1.69211	1.36302	0.00454785	0.501306	up
METTL24	0.467258	0.56552	0.444824	0.162387	0.157427	0.250711	-1.11636	0.00473143	0.514398	down
-	0.197156	0.125274	0.13361	0	0.0121298	0.0286645	-3.24071	0.00505695	0.538718	down
ARID5A	1.01503	1.07493	0.973682	1.43089	2.03178	3.21133	1.37428	0.00538331	0.558492	up
DCLRE1A	0.387444	0.62072	0.585724	0.176079	0.201698	0.19499	-1.22661	0.0056397	0.580518	down
NXPH2	0.489983	0.74375	0.415069	0.204341	0.195947	0.0712386	-1.54215	0.00588436	0.588526	down
CCL4	0.504961	0.641709	0.923955	0.157941	0.186403	0.192718	-1.70033	0.00601643	0.59364	down
MLC1	0.0317081	0.335791	0.612412	0.859524	0.907124	0.622355	1.51894	0.00625685	0.608841	up
CNN1	13.1585	9.73132	17.2999	25.1406	18.0998	36.2118	1.23976	0.00635833	0.611671	up
NUF2	1.02933	0.960298	0.24913	0.102207	0.180938	0.026724	-2.5877	0.00714561	0.644445	down
NR6A1	0.514535	0.360185	0.611691	1.34567	1.37624	0.58008	1.41089	0.00794284	0.660262	up
PRSS12	0.541892	0.484819	0.25643	0.155854	0.129333	0.173193	-1.21566	0.00794497	0.660262	down
KLF5	2.83526	2.59517	3.89593	6.55077	15.0024	6.15219	1.81196	0.00800172	0.660262	up
GIPC2	0.0793957	0.189181	0.127788	0.172453	0.286978	0.396802	1.35314	0.0081017	0.660262	up
CEP170	1.36296	2.0084	2.26805	1.09736	0.658003	0.571209	-1.01503	0.00812775	0.660262	down
DNAJC6	0.41	0.521031	0.365481	0.0789161	0.273592	0.165073	-1.08417	0.0090755	0.690905	down
NR4A2	12.4015	13.0866	28.2452	5.77548	3.25446	2.30723	-1.98451	0.00921624	0.693314	down
LRMDA	1.05867	1.40143	0.653392	2.12869	1.67487	1.69038	1.08666	0.00948518	0.706846	up
-	19.2004	9.64699	19.5178	18.1315	29.834	36.5555	1.05571	0.00963617	0.708504	up
GTSE1	#N/A	0.610401	0.292959	1.06166	1.7199	0.60756	1.62909	0.00964133	0.708504	up
EPHA3	0.205348	0.224964	0.259129	0.0442954	0.0588126	0.115819	-1.40758	0.0097805	0.711953	down
EGFL6	0.361452	0.0765561	0.293942	0.904434	0.511473	0.472964	1.64451	0.00986597	0.711953	up
TMEFF2	4.10109	5.52043	2.66206	1.64849	1.89236	1.29309	-1.08438	0.010094	0.711953	down
GCNT3	0.403871	0.419149	0.312016	0.0589503	0.163995	0.193772	-1.19962	0.0101368	0.711953	down
DKK2	6.85629	4.00744	3.69926	2.44692	2.0199	1.03518	-1.12893	0.0104199	0.725415	down
CDHR3	0.50597	0.239712	0.365448	0.0416464	0.184318	0.0871141	-1.58392	0.010958	0.752658	down
TLR2	0.117288	0.129177	0.114457	0.0244566	0.0389663	0.0358101	-1.6123	0.0110009	0.752658	down
-	0.415915	0.497908	0.431981	0.169681	0.150195	0.197185	-1.12187	0.0112136	0.760657	down
DOCK11	0.325307	0.330148	0.310017	0.169581	0.0813075	0.118241	-1.11615	0.0113339	0.765543	down
TRPC6	0.383219	0.365249	0.399293	0.189782	0.132621	0.0835743	-1.23179	0.0121522	0.79054	down
SGMS2	0.691559	1.14906	1.36962	1.16854	2.7399	2.05425	1.12879	0.0124526	0.796881	up
CCL21	29.4657	16.8576	10.7589	4.23735	3.59444	8.2172	-1.55946	0.0128977	0.796881	down
GPA33	0.359788	0.901254	0.879171	4.24165	1.96666	1.6221	2.13522	0.0131675	0.800798	up
CCN5	2.34127	1.95255	0.446245	0.274612	0.243074	0.255298	-2.33939	0.0133542	0.805538	down
IFIH1	0.22263	0.220556	0.401518	0.127288	0.086159	0.0783102	-1.27544	0.013587	0.805538	down
-	0.186226	0.206179	0.150583	0.097079	0.0312474	0.0784572	-1.11746	0.0136007	0.805538	down
CHRNA2	0	0	0.00787211	0.258366	0	0.151998	5.95298	0.0144686	0.832101	up
TIAM1	0.269691	0.267755	0.137075	0.0702945	0.124443	0.0428864	-1.24699	0.0149063	0.839113	down
-	0.424237	0.187196	0.2875	0.0552883	0.0652518	0.0770998	-1.92283	0.0151696	0.841913	down
FNDC1	5.43268	5.50547	2.28183	1.92106	1.22135	1.69825	-1.17489	0.0153575	0.846421	down
SLC4A3	2.10771	1.28629	0.980491	0.558683	0.52749	0.714162	-1.01142	0.0164313	0.886209	down
GDNF	0.301569	5.94815	9.93746	10.4674	17.5564	8.74162	1.40829	0.0166377	0.886209	up
CCDC88A	0.216205	0.322417	0.242206	0.0920057	0.142519	0.0914155	-1.01095	0.0179369	0.914749	down
KRT80	0.786863	1.87755	0.455622	1.93152	2.75758	1.3902	1.21793	0.0183843	0.923462	up
-	0.995497	1.34298	3.59017	2.58483	4.45307	3.74053	1.09396	0.01932	0.932118	up
RAB19	0.279251	0.316853	0.283867	0.0623883	0.0184078	0.108751	-1.95089	0.0198478	0.946077	down
MPHOSPH9	0.468629	0.415071	0.329132	0.151018	0.204444	0.130074	-1.06156	0.0206526	0.966594	down
ALDH1A2	0.461867	0.311258	0.768275	0.196993	0.135621	0.1488	-1.42101	0.0210789	0.966594	down
-	0.172545	0.215524	4.80769	6.1118	15.1641	4.009	2.49191	0.022035	0.981289	up
USP43	0.125849	0.133275	0.13859	0.196813	0.241959	0.365943	1.26819	0.0223081	0.981289	up
SYT1	0.187612	0.310442	0.178794	0.0122252	0.0757485	0.0895025	-1.69531	0.0223501	0.981289	down
LONRF3	1.5572	1.84739	1.90353	4.44927	8.0949	2.21386	1.72225	0.0225323	0.981289	up
LRRN1	2.7894	1.11871	1.83887	0.669463	0.949402	0.391497	-1.25226	0.0227512	0.985517	down
FKBP5	1.75484	2.11856	4.55237	5.98638	4.17822	10.7463	1.55651	0.0230026	0.988993	up
ID4	3.5826	4.85898	2.49177	0.851886	2.14615	1.54206	-1.02083	0.0242924	1	down
EXPH5	0.0401154	0.118007	0.086088	0.0185885	0.028794	0.0145809	-1.73613	0.0244696	1	down
-	0.68972	1.24902	1.47936	2.79009	3.50083	1.12813	1.36518	0.024699	1	up
-	0.0314694	0	0	0.0328097	0.203292	0.377465	4.57123	0.0247772	1	up
BMP2	0.826717	0.736215	0.668486	0.293839	0.312113	0.266344	-1.09409	0.0249326	1	down
GJA9	0.653416	0	0.7246	0	0.0548191	0	-4.4351	0.0250247	1	down
EREG	0.142174	0.0579088	0.155641	0.273654	0.29269	0.166955	1.30311	0.0253651	1	up
TRIQK	0.556661	0.736885	0.406714	0.235776	0.224752	0.151749	-1.20969	0.0254605	1	down
CTHRC1	3.62642	3.03893	1.34633	0.690421	0.96035	1.30665	-1.17445	0.0254666	1	down
PROM1	2.00981	1.21623	0.768568	0.439038	0.485772	0.553104	-1.16479	0.025528	1	down
-	1.71231	1.05553	0.649482	0.532907	0.377365	0.222942	-1.31057	0.0258503	1	down
EXOC3L2	0.3133	0.132715	0.0318478	0.310312	0.361414	0.34163	1.36661	0.0258883	1	up
ARNT2	0.121922	0.0645581	0.0309843	0.0190672	0.0168775	0	-2.30971	0.0262241	1	down
MGST2	1.91775	0.653728	0.870143	1.12415	4.00297	3.44639	1.57166	0.0263104	1	up
TTC38	#N/A	2.2372	0.819942	0.420482	0.779833	0.544481	-1.49453	0.0271859	1	down
TLCD2	0.133238	0.312436	0.251533	0.605265	0.439143	0.269817	1.17329	0.027975	1	up
RHBDL3	0.326462	0.238715	0.28445	0.113456	0.107599	0.110185	-1.09707	0.028248	1	down
NOVA1	0.511702	0.934304	0.382647	0.25755	0.189977	0.14751	-1.3528	0.0283495	1	down
LYVE1	0.974083	1.50608	0.594111	0.446851	0.323619	0.339893	-1.20114	0.0299549	1	down
DOCK3	0.0807504	0.0315056	0.0216014	0.00443104	0.0117665	0	-2.78343	0.0299906	1	down
SRXN1	1.16608	1.15648	2.01322	2.47008	1.93019	4.48059	1.28421	0.0300396	1	up
-	1.82805	1.56465	0.305469	0.182759	0.27732	0.273062	-2.06658	0.030385	1	down
GADD45A	1.90989	1.81191	6.28954	5.18552	7.98661	4.94617	1.09044	0.0308343	1	up
-	0.122304	0.099631	0.0573809	0.313877	0.112869	0.482158	1.97705	0.0314524	1	up
ROS1	0.150234	0.169706	0.106902	0.0783166	0.0415935	0.0327639	-1.2068	0.0316308	1	down
CCDC197	0.164244	0.037272	0.321993	0.379174	0.822832	0.281437	1.73893	0.0316349	1	up
-	0.11211	0.137471	0.0899706	0.190706	0.185141	0.20589	1.03712	0.0319803	1	up
CNTLN	0.0588439	0.0467371	0.0448625	0.010225	0.00452538	0.0106941	-2.29205	0.0329113	1	down
KCNJ15	0.0760574	0.0302045	0.0676503	0	0	0.0103669	-3.82083	0.0335482	1	down
CCDC126	0.886061	2.07363	1.80142	0.638677	0.736947	0.596409	-1.02454	0.0348081	1	down
MOGAT2	0.0124261	0	0.0378946	0.0129554	0.309624	0.176147	3.51874	0.034811	1	up
C4BPA	4.35941	5.192	1.92962	1.11921	1.92699	1.26335	-1.15584	0.0350417	1	down
IRF4	0.0577452	0.0611526	0.0704397	0.0120409	0.00532906	0.01889	-2.12396	0.0355148	1	down
WWOX	0.518813	0.261632	0.477162	0.87576	0.615588	0.727363	1.08601	0.0357116	1	up
ZWINT	0.0454091	0.0160295	0.0923194	0.110467	0.125719	0.123788	1.47239	0.0361827	1	up
RMDN2	0.0775838	0.0997679	0.0704163	0.0259998	0.025571	0.0422997	-1.14378	0.0366601	1	down
-	0.41281	0.765046	1.2589	0.322794	0.0952413	0.225069	-1.6613	0.0374183	1	down
-	0.694997	0.660519	0.65214	1.05903	0.77295	1.82659	1.12528	0.0378315	1	up
BICC1	0.609373	0.664035	0.269324	0.184153	0.285257	0.0963007	-1.1858	0.0386063	1	down
HSPB1	29.4608	72.7194	137.601	94.3962	196.908	137.342	1.06558	0.039002	1	up
KIRREL2	0.122974	0.179066	0.343767	0.0961584	0.0283718	0.0335233	-1.76291	0.0406904	1	down
-	0.137127	0.207455	0.278787	0.0816957	0	0.0427219	-2.0445	0.0409263	1	down
DISC1	0.311807	0.243724	0.166027	0.123843	0.0822154	0.0809529	-1.05468	0.0413117	1	down
RASGEF1A	0.139436	0.0295328	0.0850446	0.164758	0.231624	0.121636	1.29379	0.0417115	1	up
CA10	0.377453	0.199863	0.265633	0.0908146	0.0803852	0.094981	-1.39652	0.0424143	1	down
CHL1	0.222954	0.102102	0.165385	0.0502595	0.0778532	0.0525653	-1.18259	0.0433883	1	down
SLC35F1	0.675008	0.230593	0.553359	0.215668	0.200947	0.130589	-1.14762	0.0437628	1	down
WDHD1	0.268543	0.379185	0.329853	0.13999	0.134239	0.0976085	-1.13725	0.0440755	1	down
-	0.0571435	0.0453866	0.0919728	0.258169	0.105471	0.119429	1.58144	0.0442893	1	up
ISM1	0.673891	0.667613	0.213611	0.219088	0.18724	0.134323	-1.24931	0.0444284	1	down
KIF5A	0.0392852	0.0231129	0.0399345	0.00910187	0.00402829	0	-2.67699	0.0444726	1	down
TESC	0.236722	0.176412	0.178248	0.0639864	0.0242735	0.124284	-1.2096	0.0447327	1	down
KCTD4	0.223822	0.98762	0.758405	1.73072	1.91064	0.589814	1.34985	0.0447678	1	up
SAMD13	0.494686	0.338979	0.414123	0.242709	0.0805633	0	-1.65504	0.0448281	1	down
PPARGC1A	0.884735	0.776322	0.783728	4.3705	3.22706	0.661534	2.02885	0.0450127	1	up
PLEKHH2	0.109917	0.174604	0.123705	0.0532065	0.0869467	0.0214029	-1.0875	0.046107	1	down
-	0.0448116	0.142368	0.0455524	0.163521	0.186096	0.342046	1.82145	0.0468964	1	up
DUSP2	0.720889	0.452401	0.56996	0.139184	0.27104	0.174683	-1.32311	0.0470549	1	down
GLYATL2	0.207102	0.0783296	0.0601502	0	0.0409556	0	-2.84177	0.047123	1	down
RETREG1	3.09819	3.15285	24.8754	29.2733	20.5058	18.3698	1.36889	0.0474448	1	up
-	0.221508	0.175934	0.0351827	0.0144339	0.044717	0.0301922	-2.01634	0.0474859	1	down
PARP9	0.310025	0.251711	0.325655	0.0969689	0.114444	0.135224	-1.10184	0.0484707	1	down
C5AR1	0.323008	0.616944	0.269714	0.18041	0.154368	0.125791	-1.13069	0.048795	1	down
CTTNBP2	0.196093	0.296662	0.163739	0.0876191	0.0840198	0.091639	-1.05867	0.0489095	1	down
-	0.0454701	0.0963062	0.0594279	0	0.0179839	0.0212493	-2.1323	0.0496093	1	down

## Sheet: Table S9
Table S9. DEGs of LD mucle in SeD vs SY3
Gene name	SeD-1	SeD-2	SeD-3	SY3-1	SY3-2	SY3-3	log2FoldChange	pvalue	padj	Regulation
PON3	0.246926	0.131641	0.220575	1.72282	1.01665	1.80186	3.06982	1.48805e-08	0.000234739	up
PNPO	22.8065	22.2015	26.9382	43.9381	54.5186	69.2498	1.33111	6.69425e-07	0.00528009	up
TLR2	0.240062	0.214438	0.167676	0.0244566	0.0389663	0.0358101	-2.53589	1.92342e-06	0.010114	down
TRIM63	433.21	467.605	382.133	172.284	226.613	173.727	-1.05716	7.84068e-06	0.0309217	down
-	6.92959	4.9853	6.61176	3.10104	2.84094	2.241	-1.04723	1.84166e-05	0.0484191	down
RHNO1	0.414195	0.328463	0.161872	1.01145	0.842631	1.09934	1.83826	2.2618e-05	0.0484191	up
MYH3	2.78988	3.52555	4.07283	6.47426	7.26353	5.82508	1.01575	2.38555e-05	0.0484191	up
CSF1R	3.12974	2.50961	3.6934	1.37125	1.42185	1.16782	-1.1133	2.45548e-05	0.0484191	down
MRC1	1.16861	0.629	0.960254	0.45912	0.298445	0.225086	-1.33655	3.05666e-05	0.0535764	down
PRRG1	4.99511	3.48302	2.86913	1.71767	1.72372	1.29513	-1.1255	4.47456e-05	0.0597162	down
-	2.04283	2.18782	2.84387	0.99551	0.768474	1.22278	-1.13096	4.64242e-05	0.0597162	down
C5AR1	0.678207	0.386675	0.397577	0.18041	0.154368	0.125791	-1.51979	4.92115e-05	0.0597162	down
ARG2	0.690896	0.580121	1.40405	6.48396	3.71885	3.63291	2.50075	7.97914e-05	0.0808387	up
SERPINE1	48.5502	46.8714	21.5165	5.73362	7.20162	7.80572	-2.38207	8.19917e-05	0.0808387	down
MYOM3	22.3548	20.3066	14.3537	8.80712	9.69311	7.08722	-1.03644	0.000106097	0.0984517	down
ARID5B	10.6874	6.14599	11.2339	2.84668	4.13855	4.39281	-1.17316	0.000131235	0.115013	down
C1QC	13.1369	7.5065	13.1343	4.94351	5.79414	4.45716	-1.01729	0.000158132	0.125402	down
-	56.0698	35.4773	101.602	181.707	142.42	136.8	1.38741	0.000158989	0.125402	up
SOCS3	7.36575	4.08253	4.02388	0.986004	1.84624	2.30046	-1.45804	0.000203492	0.147021	down
-	2.58068	4.5882	4.73833	8.64975	6.62453	7.90052	1.05539	0.000205037	0.147021	up
TTC38	2.13269	1.42401	1.38913	0.420482	0.779833	0.544481	-1.37838	0.000244104	0.160447	down
INKA2	2.12886	3.31023	3.98925	6.32512	10.1795	6.15059	1.35343	0.000273205	0.172392	up
MLC1	0.241647	0.0966201	0.215859	0.859524	0.907124	0.622355	2.25939	0.000287538	0.174458	up
ARNTL	0.267411	0.452768	0.541891	0.758765	0.990649	0.99197	1.20723	0.000318108	0.185857	up
ARC	0.440867	0.50623	0.225311	0.0162381	0.0574932	0.101899	-2.6484	0.000336549	0.189609	down
SCD	5.9382	18.6559	2.40766	19.8131	51.9532	52.7823	2.24251	0.000825151	0.406774	up
EDN1	1.60196	1.71117	1.30657	0.555832	0.669119	0.511573	-1.30267	0.000883985	0.4171	down
MPV17	11.3734	5.34166	4.18412	1.02527	1.42047	1.46082	-2.26913	0.00101491	0.449557	down
MYOG	19.6866	24.2123	21.6764	29.0167	57.2892	43.7902	1.08182	0.00171311	0.675609	up
CACNG8	0.196923	0.195204	0.5291	0.589316	0.698994	0.776605	1.27317	0.00194687	0.714228	up
HOXA10	0.731531	2.26529	1.50853	3.1897	2.95532	2.71248	1.04471	0.00220938	0.792113	up
-	0.130807	0.135597	0.124962	0.313164	0.289519	0.305696	1.32875	0.00227391	0.797133	up
MAFF	27.7565	11.5821	24.954	9.86963	8.02139	3.70669	-1.41668	0.00260173	0.837599	down
SLC35F1	0.97195	0.309636	0.852345	0.215668	0.200947	0.130589	-1.80235	0.00298509	0.912339	down
ELOVL6	0.926043	1.38757	1.03637	1.54521	3.78807	3.65379	1.50469	0.00320352	0.912339	up
TLCD2	0.207226	0.135334	0.129578	0.605265	0.439143	0.269817	1.62232	0.00341224	0.912339	up
THBS1	14.3704	10.7898	6.84696	3.30444	3.89507	5.87786	-1.16501	0.00355111	0.933647	down
FUT1	2.14183	1.77622	1.87562	4.61498	3.05953	2.95958	1.00798	0.00373308	0.93489	up
CCR2	0.561761	0.328541	0.543942	0.264967	0.213216	0.117568	-1.12347	0.0039088	0.940014	down
-	0.262463	0.66464	0.644748	0	0.190697	0.0751074	-2.52183	0.00396468	0.940014	down
SDK1	0.56547	0.344673	0.453771	0.209386	0.255641	0.098169	-1.13983	0.00403494	0.940014	down
THRSP	0.277501	1.91941	0.34405	1.76858	5.31288	3.64194	2.08866	0.00405204	0.940014	up
ADAMTS4	1.0473	0.526124	0.367317	0.0514324	0.147959	0.228616	-2.04316	0.00429381	0.981665	down
ABHD6	1.38166	0.939151	1.06451	0.529251	0.585588	0.276766	-1.14896	0.00439454	0.990341	down
FOSB	13.9607	13.652	5.5848	1.57805	4.53689	1.99375	-1.93338	0.0046169	0.997694	down
RERG	1.47599	0.898072	1.60511	0.573581	0.562107	0.664171	-1.01096	0.00594376	1	down
PLD4	0.516723	0.60649	0.416911	0.0798118	0.254326	0.183642	-1.48372	0.00629399	1	down
LRP2	0.154675	0.128954	0.097747	0.0819401	0.0418442	0.0197768	-1.26679	0.00650797	1	down
CYP1A1	0.129603	0.0268698	0.0675337	0.441289	0.366197	0.129807	-1.41807	0.00668813	1	down
PIK3CG	0.504083	0.529076	0.443254	0.144819	0.224328	0.214572	2.25322	0.00817112	1	up
WWOX	0.268971	0.276033	0.378421	0.87576	0.615588	0.727363	-1.23424	0.00845135	1	down
CSF2RB	0.307915	0.350113	0.308363	0.184294	0.154973	0.019275	1.38328	0.00907209	1	up
ACKR2	0.63394	0.971654	0.808984	0.501775	0.268683	0.323948	-1.31207	0.00920582	1	down
EVA1C	2.33452	0.843735	1.61101	0.725067	0.356555	0.737267	-1.03509	0.00992836	1	down
MMP28	0.846395	1.10184	1.2462	1.39488	2.81977	1.81374	-1.22955	0.0104188	1	down
ICA1	1.13986	0.487747	0.951234	0.4473	0.432255	0.141634	1.0074	0.0105403	1	up
SIM1	0.204308	0.381222	0.757396	1.13479	0.920348	0.754205	-1.18194	0.0106897	1	down
HOXC5	1.14113	0.690569	1.06068	1.56534	3.1633	1.57538	1.16405	0.011276	1	up
-	0.481552	0.291418	0.345875	1.43331	0.772257	2.67226	1.24863	0.0114945	1	up
CD163	1.82842	0.752038	2.04894	0.577379	0.722166	0.367572	2.26507	0.0118078	1	up
CD300C	0.475121	0.599717	0.611662	0.0802931	0.189525	0.25193	-1.32945	0.0118365	1	down
CD48	0.736437	0.916089	1.04658	0.384677	0.397249	0.379974	-1.60281	0.0118885	1	down
EGFL6	0.183641	0.367136	0.164044	0.904434	0.511473	0.472964	-1.11189	0.0121148	1	down
MROH5	0.504044	0.470253	0.303056	0.173274	0.0876427	0.245946	1.49405	0.0121197	1	up
NLRP3	0.154274	0.185911	0.180876	0.0615577	0.0871812	0.0386291	-1.20919	0.0125514	1	down
ARMCX6	1.83004	1.37069	2.13553	2.12276	4.34787	5.49875	-1.3742	0.0133467	1	down
SLC23A1	0.119607	0.0929903	0.109069	0.26726	0.439339	0.219624	1.27894	0.0137544	1	up
ACLY	4.01399	5.82421	3.69736	5.16156	14.4293	11.2751	1.64412	0.0149715	1	up
PDK4	458.339	63.4557	156.507	3.05738	14.3442	33.1629	1.2694	0.0152975	1	up
CSRNP1	21.6017	25.92	10.2722	5.72469	8.81147	3.67369	-3.56518	0.0168509	1	down
CCR1	0.198698	0.401652	0.556518	0.174424	0.112286	0.066337	-1.56681	0.0191188	1	down
ABTB1	3.84466	2.47037	3.32079	1.89104	2.1177	0.149833	-1.61158	0.0203238	1	down
KLF11	6.86	2.00443	7.53225	1.72056	1.85312	1.67366	-1.07462	0.0212322	1	down
IER5	56.1276	67.874	39.8644	17.7545	36.6565	19.3784	-1.48971	0.0219542	1	down
ADAM32	0.063388	0.0197128	0.0330304	0.121406	0.125374	0.296276	-1.05757	0.0221473	1	down
ANKRD2	27.4951	19.4169	11.4675	5.31904	10.223	10.0734	2.3887	0.0221771	1	up
NDEL1	9.49996	3.08147	9.17445	2.84668	3.29319	2.13372	-1.06457	0.0224268	1	down
BMP2	0.429572	0.629788	0.927348	0.293839	0.312113	0.266344	-1.24076	0.0227865	1	down
GTSE1	0.313761	0.72206	0.277943	1.06166	1.7199	0.60756	-1.0889	0.0228046	1	down
OTULINL	0.897453	0.418644	0.806691	0.300802	0.399386	0.179773	1.43312	0.0231321	1	up
-	0.393422	0.423516	0.21289	0	0.128265	0.0909326	-1.12779	0.0232014	1	down
ZFAND2A	29.5184	37.529	15.6178	8.40473	13.3663	6.44624	-2.15278	0.0233468	1	down
ZKSCAN2	0.103667	0.0371991	0.012466	0.137459	0.16223	0.0718827	-1.45537	0.0234802	1	down
STARD4	0.0754731	0.0234711	0.0327731	0.176674	0.0995175	0.0839909	1.45502	0.0237861	1	up
-	2.94444	4.45123	0.937624	0.182759	0.27732	0.273062	1.63558	0.0240967	1	up
TGM1	0.106247	0.0743429	0.0726643	0.152619	0.118205	0.252733	-2.47929	0.0252494	1	down
FERMT3	0.955733	0.349998	0.314169	0.102644	0.181713	0.125246	1.18038	0.0253847	1	up
RWDD2A	0.289099	0.244031	0.161405	0.303219	0.455107	0.537743	-1.82417	0.0262036	1	down
-	0.0495038	0.0593808	0.088442	0	0.0179839	0.0212493	1.01658	0.0262123	1	up
-	0.0790311	0.033515	0.0112314	0	0.00609014	0	-2.25232	0.026282	1	down
MACIR	0.0906548	0.0845774	0.26708	0.2738	0.266	0.293346	-4.22116	0.0267431	1	down
-	0.230316	0.175808	0.0600069	0.0267345	0.0709928	0.0139805	1.02731	0.0270953	1	up
AP1S3	0.0712279	0	0.0556734	0.119368	0.21132	0.160515	-1.9444	0.0277489	1	down
MYLK3	0.141685	0.0188838	0.142386	0.029075	0.00857865	0.0101363	2.13694	0.0279049	1	up
-	0.157596	0.0518934	0.148542	0.0488272	0.0550069	0.0417823	-2.46931	0.0287769	1	down
SLC16A6	0.0644546	0.0240534	0.201517	0.259241	0.262251	0.193668	-1.14379	0.0299176	1	down
HHATL	2.57377	2.65716	1.08469	0.37087	1.17633	0.662637	1.4337	0.0305047	1	up
SELP	0.333937	0.434531	0.467076	0.185142	0.312862	0.0704131	-1.41914	0.0305918	1	down
ADA2	0.435609	0.406406	0.448818	0.170655	0.16784	0.158652	-1.02467	0.0311112	1	down
UNC13D	0.176086	0.142377	0.220213	0.0337254	0.0597045	0.0823028	-1.25865	0.0320526	1	down
MOGAT2	0.027057	0.0252431	0	0.0129554	0.309624	0.176147	-1.50415	0.0329961	1	down
-	3.08675	1.32316	1.26068	0.932069	0.612878	0.72416	-1.15448	0.0364757	1	down
-	0.0777661	0.0483685	0.048627	0.258169	0.105471	0.119429	1.62321	0.0369659	1	up
CSF3R	0.353862	0.270114	0.377164	0.0462098	0.218149	0.11277	-1.30572	0.0377001	1	down
DUSP2	0.261614	0.705106	0.863375	0.139184	0.27104	0.174683	-1.57688	0.0379992	1	down
SLC25A34	9.50085	1.72354	7.08229	1.2426	2.08794	1.96043	-1.62544	0.0385375	1	down
MLYCD	6.28709	0.876879	2.44218	0.413547	0.49525	0.483405	-2.59401	0.0385902	1	down
SYTL3	0.072178	0.286192	0.296184	0.0518403	0.0611824	0.0542186	-1.90295	0.0387222	1	down
DGAT2	0.945155	2.55132	1.04411	1.59301	4.41178	4.35455	1.24078	0.0389554	1	up
-	0.558832	0.361766	0.855765	0.27304	0.348025	0.148495	-1.08037	0.0391033	1	down
ROS1	0.179918	0.0559522	0.183243	0.0783166	0.0415935	0.0327639	-1.28694	0.0402576	1	down
MYOD1	1.35656	1.50059	1.49877	6.35844	2.12029	3.54866	1.59359	0.0403486	1	up
ZNF26	0.137731	0.0550704	0.246066	0.358005	0.233498	0.453257	1.39399	0.0408825	1	up
CCDC34	0.0384253	0.0477991	0.0300342	0.134924	0.0651433	0.1796	1.81761	0.0417516	1	up
-	0.0267033	0.0622829	0.135668	0.166219	0.158448	0.267454	1.48627	0.0417552	1	up
STAP1	0.0725967	0.169325	0.255345	0	0.0307687	0	-3.97359	0.041982	1	down
CES3	0.132874	0.0442735	0.059347	0.118156	0.168948	0.218636	1.25766	0.0432325	1	up
PLA2G4E	0.415757	0.597989	0.616081	0.0995362	0.205579	0.451112	-1.02227	0.0444023	1	down
GNAT1	0.305115	0.115403	0.264268	0.0710733	0.118832	0.115631	-1.02031	0.0446633	1	down
CIDEC	1.75499	5.23236	2.29618	3.28822	12.2568	8.36843	1.40907	0.0450526	1	up
KLF8	0.120268	0.0785435	0.197409	0.218829	0.254865	0.337279	1.15686	0.0456685	1	up
WAS	0.426004	0.419525	0.332975	0.203979	0.19345	0.152383	-1.06448	0.0468255	1	down
RNF180	0.385124	0.159691	0.309384	0.143426	0.172295	0.0535736	-1.0585	0.0468426	1	down
TMEM35A	0.755829	0.341206	0.304916	0.18679	0.186006	0.14652	-1.27434	0.0468669	1	down
FAM124B	0.137941	0.0643469	0.0808636	0.280708	0.160775	0.259047	1.46632	0.0473003	1	up
-	0.135652	0.253115	0.0765761	0.0144339	0.044717	0.0301922	-1.60933	0.0483409	1	down
STX3	0.156932	0.202724	0.155687	0.0635819	0.122793	0.0423175	-1.08007	0.0485629	1	down
RDH5	0.172724	0.0966868	0.0810031	0.0661628	0.819903	0.691983	2.28992	0.0486879	1	up
MS4A2	0.462131	0.25869	0.681144	0.151733	0.190269	0.290939	-1.01984	0.0495007	1	down
ADORA3	0.267891	0.106221	0.340259	0.134685	0.0851552	0.0670781	-1.16025	0.0495502	1	down

[truncated: 6 more sheets: Table S10, Table S11, Table S12, Table S13., Table S14, Table S15]
